# Supplementary material for: Analyzing the ER stress response in ALS patient derived motor neurons identifies druggable neuroprotective targets
Source: Front Cell Neurosci. 2024 Jan 19;17:1327361. doi: 10.3389/fncel.2023.1327361 (PMC10834640; doi:10.3389/fncel.2023.1327361)
Supplement: Supplementary file 1 [file Table_1.XLSX]

## Sheet: Protein
											Kenp_DMSO vs DMSO_DMSO				MAP4K4_DMSO vs DMSO_DMSO				DMSO_Thap_d1 vsDMSO_DMSO				DMSO_Thap_d2 vs DMSO_DMSO				Kenp_Thap_d1 vs DMSO_Thap_d1				MAP4K4_Thap_d1 vs DMSO_Thap_d1				Kenp_Thap_d2 vs DMSO_Thap_d2				MAP4K4_Thap_d2 vs DMSO_Thap_d2
Rank	UniProt ID	Gene Symbol	Description	Gene (Pep Set1)	Gene (Pep Set2)	Gene (Pep Set1;2)	Found in Set	Compartment	Quant Peptide Set1	Quant Peptide Set2	Significant	-Log10(p-value)	q-value	Log2 FC	Significant	-Log10(p-value)	q-value	Log2 FC	Significant	-Log10(p-value)	q-value	Log2 FC	Significant	-Log10(p-value)	q-value	Log2 FC	Significant	-Log10(p-value)	q-value	Log2 FC	Significant	-Log10(p-value)	q-value	Log2 FC	Significant	-Log10(p-value)	q-value	Log2 FC	Significant	-Log10(p-value)	q-value	Log2 FC			Sample1_ratio_Set1	Sample2_ratio_Set1	Sample3_ratio_Set1	Sample4_ratio_Set1	Sample5_ratio_Set1
6401	Q8IZJ1	UNC5B	Netrin receptor UNC5B OS=Homo sapiens GN=UNC5B PE=1 SV=2	UNC5B (3)	UNC5B (1)	UNC5B (3;1)	Both		3	1		0.115181	0.897699	0.0217842		0.0781272	0.920235	0.0211874	+	1.16648	0	2.63936	+	1.28616	0	3.22255		0.208622	1	-0.262717		0.0143864	1	-0.0200915		0.0703426	0.961624	-0.0793384		0.131673	1	-0.138535			-0.0310943	0.0304191	0.0776807	-0.0588912	2.35055
3020	Q9Y561	LRP12	Low-density lipoprotein receptor-related protein 12 OS=Homo sapiens GN=LRP12 PE=1 SV=1	LRP12 (5)	LRP12 (4)	LRP12 (5;4)	Both		5	4		3.16299	0.416773	0.126264		1.05102	0.416605	0.191805	+	7.30606	0	1.22232	+	4.69563	0	1.89236		0.987855	1	-0.237283		0.10207	1	0.028588		0.654987	0.973836	-0.109669		0.472116	1	0.0734094			-0.0242	0.0237857	0.128505	0.157961	1.21623
3478	P13995	MTHFD2	Bifunctional methylenetetrahydrofolate dehydrogenase/cyclohydrolase, mitochondrial OS=Homo sapiens GN=MTHFD2 PE=1 SV=2	MTHFD2 (9)	MTHFD2 (8)	MTHFD2 (9;8)	Both	Mitochondrion-Mtx	9	8		1.02271	0.252598	0.2522		0.646587	0.541938	0.132114	+	1.55657	0.00448	1.18231	+	1.06777	0.00254545	1.82851		1.02945	1	-0.496326		0.701128	1	0.242556		0.381215	1	-0.348153		0.170937	1	0.182092			0.0602958	-0.0628856	0.185451	0.0681918	1.08343
211	Q3SY69	ALDH1L2	Mitochondrial 10-formyltetrahydrofolate dehydrogenase OS=Homo sapiens GN=ALDH1L2 PE=1 SV=2	ALDH1L2 (10)	ALDH1L2 (9)	ALDH1L2 (10;9)	Both		10	9		0.208797	0.746774	-0.0538779		0.35322	0.896033	0.0246939	+	1.45564	0.00713514	1.16902	+	1.59777	0.00373333	1.73473		1.13081	1	-0.355032		0.0419331	1	0.0162526		1.028	1	-0.371706		0.219368	1	0.0645919			0.00969384	-0.00975335	0.0250077	0.046319	1.09821
580	Q9BXH1	BBC3	Bcl-2-binding component 3 OS=Homo sapiens GN=BBC3 PE=1 SV=1	BBC3 (2)	BBC3 (1)	BBC3 (2;1)	Both		2	1		0.479679	0.130444	-1.20817		0.20101	0.638789	-0.103675	+	1.24878	0.00509091	1.36996	+	1.53979	0.00329412	1.71805		1.22838	1	-1.12699		0.109296	1	-0.0466751		1.5678	1	-1.1716		0.271227	1	-0.0806169			-0.0322838	0.0315573	-1.90127	-0.26161	1.4977
2471	Q15011	HERPUD1	Homocysteine-responsive endoplasmic reticulum-resident ubiquitin-like domain member 1 protein OS=Homo sapiens GN=HERPUD1 PE=1 SV=1	HERPUD1 (1)	HERPUD1 (1)	HERPUD1 (1;1)	Both		1	1		1.16054	0.13683	-0.603347		0.524457	0.266702	-0.424873	+	0.880881	0.0056	1.69386	+	1.21455	0.00186667	1.58949		0.0511514	1	0.0712339		0.179402	1	0.281918		0.221143	1	0.173615		0.291799	1	0.281454			-0.00664141	0.0066067	-0.53618	-0.640591	1.33854
5751	P53999	SUB1	Activated RNA polymerase II transcriptional coactivator p15 OS=Homo sapiens GN=SUB1 PE=1 SV=3	SUB1 (7)	SUB1 (7)	SUB1 (7;7)	Both		7	7		0.616167	0.356866	0.180049		0.21718	0.731264	0.0637646		2.76487	0.0262703	0.712755	+	0.877664	0.00224	1.5772		0.322295	1	-0.265698		1.59724	1	-0.49455		0.714733	1	-1.03386		0.0963525	1	0.165703			-0.12426	0.114331	0.266211	-0.0277627	0.758865
1920	Q9BZQ8	FAM129A	Protein Niban OS=Homo sapiens GN=FAM129A PE=1 SV=1	FAM129A (4)	FAM129A (6)	FAM129A (4;6)	Both		4	6		0.622808	0.312539	0.217448		1.29554	0.616809	0.0866136		1.05876	0.0373474	0.854521	+	1.54152	0.00294737	1.56478		0.618612	1	-0.27456		0.251201	1	0.107332		0.711318	1	-0.245729		0.136791	1	0.0438514			0.0581596	-0.0605639	0.124206	0.0678095	0.723045
786	Q9P1Z2	CALCOCO1	Calcium-binding and coiled-coil domain-containing protein 1 OS=Homo sapiens GN=CALCOCO1 PE=1 SV=2	CALCOCO1 (4)	CALCOCO1 (3)	CALCOCO1 (4;3)	Both		4	3		0.606288	0.198047	-0.405824		1.51573	0.22048	0.392192	+	3.01965	0.00606452	0.905492	+	1.7084	0.0035	1.5007		0.557734	1	-0.566134		0.22439	1	-0.0562182		1.19715	1	-0.660112		0.118336	1	0.0647596			-0.0824921	0.0779812	-0.599208	0.31622	0.90033
3704	Q92832	NELL1	Protein kinase C-binding protein NELL1 OS=Homo sapiens GN=NELL1 PE=1 SV=4	NELL1 (4)	NELL1 (4)	NELL1 (4;4)	Both		4	4		0.699406	0.586839	0.0810966		0.740021	0.593482	-0.104148	+	1.36643	0.00876596	1.06285	+	1.07977	0.00273171	1.48387		0.697472	1	-0.225892		0.0295791	1	0.0113212		0.120592	0.972532	-0.106596		0.0256687	1	0.0241853			-0.0153529	0.0151816	0.0461741	-0.0648125	1.15064
3705	Q99435	NELL2	Protein kinase C-binding protein NELL2 OS=Homo sapiens GN=NELL2 PE=1 SV=1	NELL2 (2)	NELL2 (3)	NELL2 (2;3)	Both		2	3		0.894059	0.604443	-0.0722447		0.103149	0.935835	0.0153138	+	4.25628	0.00628571	0.817248	+	3.77139	0	1.48325		0.927045	1	-0.382063		0.0215288	1	-0.00352386		1.01736	1	-0.201902		0.0552587	1	-0.00743973			0.0398782	-0.0409856	-0.0818709	-0.0242311	0.827976
2268	P63215	GNG3	Guanine nucleotide-binding protein G(I)/G(S)/G(O) subunit gamma-3 OS=Homo sapiens GN=GNG3 PE=1 SV=1	GNG3 (2)	GNG3 (3)	GNG3 (2;3)	Both		2	3		0.40869	0.266925	0.28409		0.895884	0.398519	0.207177		0.647957	0.0657548	0.791664	+	0.818806	0.00954839	1.47801		0.0177135	1	-0.0361064		0.425749	1	-0.421711		0.640652	1	-0.85978		0.126251	1	0.306942			-0.0320619	0.031345	0.0835517	0.158115	0.498656
5434	P30825	SLC7A1	High affinity cationic amino acid transporter 1 OS=Homo sapiens GN=SLC7A1 PE=1 SV=1	SLC7A1 (3)	SLC7A1 (4)	SLC7A1 (3;4)	Both	Plasma membrane	3	4		0.577491	0.562499	0.091548		2.38946	0.416662	0.166884		1.32945	0.0307179	0.86125	+	1.23759	0.00260465	1.36705		0.0943101	1	-0.0258608		0.306837	1	0.0871825		0.206939	0.97326	-0.0972552		0.0656113	1	-0.0418462			-0.0454797	0.0440624	0.137306	0.150559	0.939968
5425	P08195	SLC3A2	4F2 cell-surface antigen heavy chain OS=Homo sapiens GN=SLC3A2 PE=1 SV=3	SLC3A2 (21)	SLC3A2 (20)	SLC3A2 (21;20)	Both	Plasma membrane	21	20		0.510436	0.45619	0.138791		0.193349	0.890825	0.0272874		1.22235	0.0584538	0.717889	+	2.86251	0.004	1.36107		0.34909	1	-0.095211		0.336819	1	0.0893123		0.923651	0.980143	-0.102432		1.24058	1	0.189126			-0.00306661	0.00305805	0.0641668	-0.0160983	0.644487
5574	Q8IXZ3	SP8	Transcription factor Sp8 OS=Homo sapiens GN=SP8 PE=1 SV=3	SP8 (1)	SP8 (2)	SP8 (1;2)	Both		1	2		1.24273	0.178598	-0.452881		0.779624	0.275036	-0.362763		1.443	0.0580615	0.664033	+	0.943556	0.0102857	1.34492		0.114584	1	-0.10532		0.275072	1	0.184824		0.331732	1	-0.284437		0.103639	1	-0.0921147			0.00077062	-0.000770516	-0.50635	-0.463885	0.611151
3642	O43678	NDUFA2	NADH dehydrogenase [ubiquinone] 1 alpha subcomplex subunit 2 OS=Homo sapiens GN=NDUFA2 PE=1 SV=3	NDUFA2 (1)	NDUFA2 (2)	NDUFA2 (1;2)	Both	Mitochondrion-Mtx	1	2		0.194058	0.807049	-0.035358		0.0720221	0.724996	0.0868764		0.45805	0.206674	0.34125		0.385789	0.0685279	1.34187		0.0305297	1	0.0414411		0.28747	1	-0.242728		0.273273	1	-0.909612		0.0677547	1	0.348724			-0.0211106	0.020793	-0.0867194	-0.269699	0.12442
5276	P58004	SESN2	Sestrin-2 OS=Homo sapiens GN=SESN2 PE=1 SV=1	SESN2 (4)	SESN2 (1)	SESN2 (4;1)	Both		4	1		0.882404	0.348552	0.169405		0.179486	0.663818	-0.0874684	+	1.33165	0.00643902	1.08452	+	1.36951	0.00243478	1.22458		0.16296	1	0.179185		0.203949	1	0.184472		0.204853	1	0.253584		0.00911951	1	0.0073548			-0.0210923	0.0207752	0.149022	0.0512104	0.91656
6543	P23381	WARS	Tryptophan--tRNA ligase, cytoplasmic OS=Homo sapiens GN=WARS PE=1 SV=2	WARS (24)	WARS (24)	WARS (24;24)	Both		24	24		1.26775	0.511634	0.0954248		1.62931	0.386868	0.190133		4.00714	0.0288312	0.670575	+	2.29337	0.00207407	1.17885		0.0497866	1	-0.0154059		0.433799	1	-0.0640993		0.944846	1	-0.196109		0.424372	1	0.0745163			-0.0244795	0.024056	0.089833	0.157765	0.66056
6060	Q6PI78	TMEM65	Transmembrane protein 65 OS=Homo sapiens GN=TMEM65 PE=1 SV=2	TMEM65 (2)	TMEM65 (1)	TMEM65 (2;1)	Both		2	1		0.579651	0.24751	-0.284016		0.251827	0.712344	0.0654758		0.0115356	0.962942	0.0106554		0.486425	0.061076	1.16388		0.0197682	1	-0.0179679		0.0735864	1	0.0785061		0.391935	1	-0.891671		0.311452	1	-0.671116			-0.156523	0.141106	-0.143991	-0.0134417	0.26317
2542	Q5T6W2	HNRNPK	Heterogeneous nuclear ribonucleoprotein K (Fragment) OS=Homo sapiens GN=HNRNPK PE=1 SV=1	HNRNPK (2)	HNRNPK (3)	HNRNPK (2;3)	Both		2	3		0.162036	0.782077	-0.0452894		0.312196	0.587106	0.124769		0.278324	0.308052	0.252194		0.337969	0.102652	1.14472		0.0573279	1	0.0869853		0.26037	1	-0.232812		0.287546	1	-0.945774		0.0459485	1	0.238759			-0.0579889	0.0557132	-0.131034	0.00146266	-0.024248
5435	Q01650	SLC7A5	Large neutral amino acids transporter small subunit 1 OS=Homo sapiens GN=SLC7A5 PE=1 SV=2	SLC7A5 (5)	SLC7A5 (3)	SLC7A5 (5;3)	Both	Plasma membrane	5	3		0.145653	0.794407	-0.0438166		1.16546	0.581832	-0.106138		1.24945	0.0752784	0.584107	+	1.89291	0.00254545	1.13712		0.128663	1	-0.0338002		0.466813	1	0.178716		0.116109	0.982953	0.0211288		0.34611	1	0.152119			0.03808	-0.0390875	0.0468687	-0.133023	0.655275
453	P08243	ASNS	Asparagine synthetase [glutamine-hydrolyzing] OS=Homo sapiens GN=ASNS PE=1 SV=4	ASNS (31)	ASNS (25)	ASNS (31;25)	Both		31	25		0.137091	0.938439	0.0115951		2.53905	0.388571	0.18048		1.79766	0.0198	0.869955		1.25444	0.0131765	1.11963		0.568483	1	-0.0899404		0.844753	1	0.152048		0.412512	1	0.148676		0.605746	1	0.25991			-0.0408859	0.039734	-0.0121618	0.195648	0.916094
2736	Q9Y4H2	IRS2	Insulin receptor substrate 2 OS=Homo sapiens GN=IRS2 PE=1 SV=2	IRS2 (3)	IRS2 (2)	IRS2 (3;2)	Both		3	2		1.12424	0.12648	-0.603874		1.50396	0.457637	-0.152023		1.1483	0.0324045	0.858334	+	2.82943	0.00193103	1.08977		1.21221	1	-0.664803		0.0114177	1	0.0073112		1.83718	1	-0.663973		0.246753	1	0.0840324			-0.0990944	0.0926662	-0.709575	-0.155429	0.729114
5496	Q6GMV2	SMYD5	SET and MYND domain-containing protein 5 OS=Homo sapiens GN=SMYD5 PE=1 SV=2	SMYD5 (1)	SMYD5 (3)	SMYD5 (1;3)	Both		1	3		0.720651	0.247565	0.284708		0.363638	0.209111	0.682568		0.36991	0.120613	0.600076		0.508304	0.0697705	1.06418		0.10973	1	-0.194806		0.359472	1	-0.563057		0.424794	1	-0.790545		0.063522	1	-0.214471			0.00519397	-0.00520963	0.185146	0.12914	0.122807
2573	P02790	HPX	Hemopexin OS=Homo sapiens GN=HPX PE=1 SV=2	HPX (6)	HPX (7)	HPX (6;7)	Both		6	7		1.83037	0.0746667	0.908484		0.100746	0.780916	0.052549		0.0665839	0.604407	0.126339		1.28056	0.0126197	1.04278		0.359107	1	0.750293		0.290775	1	0.518533		0.673155	1	-0.529901		1.09992	1	-1.16998			0.351109	-0.464677	0.753348	0.0339279	-0.457298
5852	H7C3L5	TAX1BP1	Tax1-binding protein 1 (Fragment) OS=Homo sapiens GN=TAX1BP1 PE=1 SV=1	TAX1BP1 (2)	TAX1BP1 (1)	TAX1BP1 (2;1)	Both		2	1		0.0140788	0.937329	-0.0182192		1.37272	0.281201	0.308889		1.00284	0.0455094	0.805646		1.01412	0.0210753	1.03995		0.0792155	1	-0.0365734		0.0211771	1	0.00953317		0.129051	0.960923	0.0686367		0.379485	1	0.197869			-0.00214579	0.00214131	0.345097	0.329684	0.932422
6080	Q71RG4	TMUB2	Transmembrane and ubiquitin-like domain-containing protein 2 OS=Homo sapiens GN=TMUB2 PE=1 SV=2	TMUB2 (1)	TMUB2 (1)	TMUB2 (1;1)	Both		1	1		0.15526	0.683203	0.0625106		0.640848	0.497574	0.144333		0.241646	0.539547	0.101782	+	2.77669	0.00329412	1.02147		0.304421	1	0.132311		0.437676	1	0.277565		1.63747	1	-0.305256		0.0307477	1	0.0244252			-0.169914	0.151903	-0.0561343	0.133439	-0.030996
3593	Q14596	NBR1	Next to BRCA1 gene 1 protein OS=Homo sapiens GN=NBR1 PE=1 SV=3	NBR1 (2)	NBR1 (1)	NBR1 (2;1)	Both	Endosome	2	1		0.609851	0.165512	-0.58757		0.299724	0.285655	0.435643		0.0716527	0.66701	0.0884879	+	1.806	0.00847458	0.996579		0.0773841	1	-0.118584		0.176546	1	-0.288726		0.604272	1	-0.395637		0.317639	1	-0.0509259			-0.423943	0.32706	-0.92815	-0.0572438	-0.297833
2332	Q8TD30	GPT2	Alanine aminotransferase 2 OS=Homo sapiens GN=GPT2 PE=1 SV=1	GPT2 (7)	GPT2 (5)	GPT2 (7;5)	Both	Mitochondrion-Mtx	7	5		0.597771	0.312059	-0.2222		0.0292084	0.989533	0.00337799		1.06943	0.0624427	0.709989		0.977774	0.0277736	0.990332		0.178056	1	-0.0594447		0.017722	1	-0.00632557		0.191194	0.976775	-0.127879		0.00951806	1	0.0062483			0.0159685	-0.0161368	-0.31731	-0.029027	0.609639
5603	Q92563	SPOCK2	Testican-2 OS=Homo sapiens GN=SPOCK2 PE=1 SV=1	SPOCK2 (6)	SPOCK2 (6)	SPOCK2 (6;6)	Both		6	6		0.569488	0.254822	-0.291171		0.347129	0.423761	0.226528		1.07286	0.0789495	0.601406		1.16697	0.0216	0.977029		0.796204	1	-0.322104		0.455299	1	-0.134721		0.904444	1	-0.363863		0.184143	1	-0.0770897			-0.0197759	0.0194962	-0.42298	0.0330512	0.51857
2513	P09429	HMGB1	High mobility group protein B1 OS=Homo sapiens GN=HMGB1 PE=1 SV=3	HMGB1 (27)	HMGB1 (22)	HMGB1 (27;22)	Both		27	22		0.522793	0.564283	0.0838593		0.0441668	0.936305	0.0171683		0.749664	0.0738202	0.69903	+	2.26627	0.00510345	0.968474		0.178435	1	-0.139975		0.550318	1	-0.421688		1.57496	1	-0.554601		0.19485	1	0.0961743			-0.0592724	0.0568976	0.127114	-0.0939977	0.915396
5987	O76062	TM7SF2	Delta(14)-sterol reductase OS=Homo sapiens GN=TM7SF2 PE=2 SV=3	TM7SF2 (2)	TM7SF2 (1)	TM7SF2 (2;1)	Both		2	1		0.0250785	0.897547	0.0278428		0.594602	0.271668	0.396077		0.112888	0.380019	0.267906		0.355846	0.104244	0.964456		0.0284414	1	-0.0805446		0.0271137	1	0.0858602		0.0473673	0.964917	-0.155249		0.0405793	1	0.148277			-0.151935	0.137365	-0.289724	0.206739	-0.448508
851	Q13185	CBX3	Chromobox protein homolog 3 OS=Homo sapiens GN=CBX3 PE=1 SV=4	CBX3 (4)	CBX3 (2)	CBX3 (4;2)	Both		4	2		0.0434178	0.787548	0.0571887		0.415698	0.359656	0.245563		0.256093	0.320591	0.232682		0.583435	0.0695249	0.960341		0.0447123	1	-0.0757366		0.269799	1	-0.400395		0.436455	1	-0.695169		0.0556117	1	0.162392			-0.329448	0.267871	-0.333222	0.0460684	-0.0639888
2934	Q9BRS8	LARP6	La-related protein 6 OS=Homo sapiens GN=LARP6 PE=1 SV=1	LARP6 (5)	LARP6 (3)	LARP6 (5;3)	Both		5	3		0.401081	0.433666	-0.152692		0.241074	0.689293	-0.0796001		1.48636	0.080724	0.525658	+	3.1305	0.00238298	0.956133		1.09215	1	-0.248797		0.833205	1	0.19828		1.35095	1	-0.205756		0.0687079	1	0.0416676			0.0170367	-0.0172294	-0.040306	0.0213092	0.581754
3911	Q8N543	OGFOD1	Prolyl 3-hydroxylase OGFOD1 OS=Homo sapiens GN=OGFOD1 PE=1 SV=1	OGFOD1 (2)	OGFOD1 (1)	OGFOD1 (2;1)	Both		2	1		0.366073	0.226957	0.405521		0.277503	0.446996	0.213989		0.516818	0.0989041	0.645832		0.444093	0.0925259	0.954052		0.0635313	1	0.103904		0.0530339	1	0.0786273		0.248433	1	-0.492846		0.0306545	1	0.0944066			0.0133622	-0.0134789	0.0754503	-0.0234375	0.304176
4882	P49796	RGS3	Regulator of G-protein signaling 3 OS=Homo sapiens GN=RGS3 PE=1 SV=2	RGS3 (7)	RGS3 (5)	RGS3 (7;5)	Both		7	5		0.785443	0.440834	-0.13558		0.614784	0.75614	-0.0533083		1.88798	0.084944	0.4836		1.14625	0.0260594	0.952219		1.72392	1	-0.345321		0.0362905	1	0.00563863		0.629881	1	-0.250372		0.0115619	1	0.00632027			-0.0265369	0.0260411	-0.181137	-0.0268061	0.448987
4542	Q9Y617	PSAT1	Phosphoserine aminotransferase OS=Homo sapiens GN=PSAT1 PE=1 SV=2	PSAT1 (24)	PSAT1 (21)	PSAT1 (24;21)	Both		24	21		0.931846	0.462861	0.128344		0.881305	0.580211	0.119406		1.1537	0.0621314	0.689767	+	4.18694	0.00528571	0.922359		0.146425	1	-0.0504139		0.0300392	1	0.0117018		1.49959	0.966243	-0.070904		0.534363	1	0.0528537			0.0086078	-0.0086541	0.153933	0.14596	0.766986
5046	P62273	RPS29	40S ribosomal protein S29 OS=Homo sapiens GN=RPS29 PE=1 SV=2	RPS29 (1)	RPS29 (1)	RPS29 (1;1)	Both	Ribosome	1	1		0.126866	0.465233	0.175213		0.50956	0.207733	1.07355		0.593521	0.0674601	0.800188		0.283008	0.129376	0.909652		0.0606111	1	0.0775322		0.348428	1	-0.418473		0.196123	1	-0.624965		0.095563	1	-0.328495			0.124283	-0.135917	-0.248352	0.48861	0.433766
2602	P11021	HSPA5	78 kDa glucose-regulated protein OS=Homo sapiens GN=HSPA5 PE=1 SV=2	HSPA5 (100)	HSPA5 (97)	HSPA5 (100;97)	Both	ER-Lumen	100	97		0.0232749	0.990281	-0.00163902		1.91616	0.548557	0.11355		3.73213	0.0619697	0.538962		2.11578	0.0135584	0.908117		1.26654	1	-0.115658		0.0332671	1	-0.00272724		0.942507	1	-0.212945		0.518551	1	0.179138			-0.0411742	0.0400067	-0.00787141	0.0999272	0.558356
1736	Q13541	EIF4EBP1	Eukaryotic translation initiation factor 4E-binding protein 1 OS=Homo sapiens GN=EIF4EBP1 PE=1 SV=3	EIF4EBP1 (7)	EIF4EBP1 (5)	EIF4EBP1 (7;5)	Both		7	5		0.0471365	0.946168	0.0108674		2.16782	0.310785	-0.245554		0.639103	0.13846	0.434559		1.38554	0.0218298	0.902058		0.361742	1	0.20471		0.102646	1	0.0598823		0.0911473	0.963789	-0.0461347		0.0907563	1	0.036284			-0.0926159	0.0869739	0.0725088	-0.245924	0.606585
40	Q8IZP0	ABI1	Abl interactor 1 OS=Homo sapiens GN=ABI1 PE=1 SV=4	ABI1 (6)	ABI1 (7)	ABI1 (6;7)	Both		6	7		0.645776	0.287393	0.235601		0.0805844	0.814401	0.0515377		1.71971	0.0898415	0.471015		0.990878	0.0387576	0.900286		0.1326	1	-0.1719		0.327368	1	-0.236994		0.978633	1	-0.679382		0.0670486	1	0.115885			0.01956	-0.0198163	0.134318	-0.138425	0.416507
4618	Q12923	PTPN13	Tyrosine-protein phosphatase non-receptor type 13 OS=Homo sapiens GN=PTPN13 PE=1 SV=2	PTPN13 (11)	PTPN13 (6)	PTPN13 (11;6)	Both		11	6		0.354878	0.702764	0.0595986		0.624336	0.904326	-0.0206663		1.07772	0.0691636	0.646118		1.02776	0.0408633	0.885187		0.730131	1	-0.249604		0.07348	1	0.0382488		0.317544	0.987095	-0.141		0.00429746	1	0.00227496			-0.0219255	0.0215836	0.00837784	-0.0211318	0.554162
3894	Q96E22	NUS1	Dehydrodolichyl diphosphate synthase complex subunit NUS1 OS=Homo sapiens GN=NUS1 PE=1 SV=1	NUS1 (2)	NUS1 (1)	NUS1 (2;1)	Both		2	1		3.11398	0.200459	-0.344475		0.319585	0.614541	-0.106839		3.51734	0.0733626	0.489572		1.17653	0.036595	0.873214		2.04296	1	-0.508153		0.118591	1	-0.0240327		0.83706	1	-0.425167		0.235194	1	-0.086769			-0.0584175	0.056109	-0.35282	-0.00534047	0.511306
2775	Q9BX67	JAM3	Junctional adhesion molecule C OS=Homo sapiens GN=JAM3 PE=1 SV=1	JAM3 (1)	JAM3 (1)	JAM3 (1;1)	Both		1	1		1.31907	0.234711	0.277642		0.33862	0.275023	0.469419		0.309097	0.250072	0.31402		0.364158	0.111689	0.871822		0.28466	1	-0.286689		0.474171	1	-0.493704		0.252819	1	-0.583992		0.115347	1	-0.284417			0.0628075	-0.0656241	0.334407	0.0508328	0.00218888
5853	Q86VP1	TAX1BP1	Tax1-binding protein 1 OS=Homo sapiens GN=TAX1BP1 PE=1 SV=2	TAX1BP1 (10)	TAX1BP1 (8)	TAX1BP1 (10;8)	Both	Endosome	10	8		0.298499	0.281581	0.291806		4.3018	0.326373	0.22107		1.61958	0.0641074	0.620188		1.5995	0.0264762	0.866942		0.104856	1	0.0444006		0.761646	1	0.0949929		0.440544	0.967353	-0.0703417		0.428132	1	0.124831			-0.0174228	0.0172041	-0.00292098	0.227254	0.654845
2137	P51570	GALK1	Galactokinase OS=Homo sapiens GN=GALK1 PE=1 SV=1	GALK1 (5)	GALK1 (4)	GALK1 (5;4)	Both		5	4		0.40133	0.479203	0.126613		0.00125154	0.997071	0.00134299		3.84413	0.0317647	0.65468		1.1417	0.0371077	0.862605		0.0910721	1	-0.0695869		0.628666	1	-0.326571		0.692154	1	-0.293585		0.0265966	1	0.0381206			-0.0819004	0.0774519	0.0296458	-0.296472	0.678448
6230	Q9H2G4	TSPYL2	Testis-specific Y-encoded-like protein 2 OS=Homo sapiens GN=TSPYL2 PE=1 SV=1	TSPYL2 (2)	TSPYL2 (1)	TSPYL2 (2;1)	Both	Nuclear (100% filter)	2	1		1.01434	0.262301	-0.232593		2.1629	0.342168	0.215254		1.44115	0.0151852	0.939615		1.11081	0.0391407	0.856089		1.04749	1	-0.400784		0.223257	1	0.0707479		0.499263	1	-0.217446		0.017605	1	-0.0095036			-0.056558	0.0543902	-0.17263	0.195549	0.843929
6499	P98155	VLDLR	Very low-density lipoprotein receptor OS=Homo sapiens GN=VLDLR PE=1 SV=1	VLDLR (4)	VLDLR (7)	VLDLR (4;7)	Both	Endosome	4	7		0.183353	0.642844	-0.0798875		0.561711	0.308082	0.316894		1.37365	0.0991565	0.473606		1.27752	0.0367395	0.852436		0.350214	1	0.242883		0.233014	1	0.100973		0.176593	0.964454	-0.0673256		0.0487039	1	-0.0222416			0.072048	-0.0757868	-0.214139	0.467889	0.535995
10	P49588	AARS	Alanine--tRNA ligase, cytoplasmic OS=Homo sapiens GN=AARS PE=1 SV=2	AARS (64)	AARS (57)	AARS (64;57)	Both		64	57		1.27372	0.789177	-0.0389871		0.881192	0.638792	0.0903105		1.57377	0.106325	0.456696	+	7.66243	0.00370909	0.849739		1.1155	1	-0.142903		0.106704	1	0.0111506		1.74527	1	-0.245441		1.01803	1	0.0375889			-0.00938009	0.00931352	-0.0320811	0.110845	0.4792
2535	Q14103	HNRNPD	Heterogeneous nuclear ribonucleoprotein D0 OS=Homo sapiens GN=HNRNPD PE=1 SV=1	HNRNPD (21)	HNRNPD (21)	HNRNPD (21;21)	Both		21	21		0.491441	0.472049	-0.115491		0.354382	0.633846	0.0871245		1.71569	0.139451	0.341517		1.12909	0.0373953	0.847746		0.319634	1	-0.231951		0.621728	1	-0.320019		0.841254	1	-0.686466		0.200129	1	0.217597			-0.139963	0.1275	-0.187547	0.014483	0.336513
4854	P78509	RELN	Reelin OS=Homo sapiens GN=RELN PE=1 SV=3	RELN (4)	RELN (5)	RELN (4;5)	Both		4	5		0.949016	0.538083	0.0869116		0.64012	0.531192	0.139517		4.07024	0.0239403	0.694969		1.33416	0.0362951	0.834232		0.798717	1	-0.243746		0.418636	1	0.066775		1.01133	1	-0.351686		0.0366952	1	0.0204598			0.0713211	-0.0749824	0.113121	0.0751287	0.686255
1845	Q86YB8	ERO1B	ERO1-like protein beta OS=Homo sapiens GN=ERO1B PE=1 SV=2	ERO1B (1)	ERO1B (1)	ERO1B (1;1)	Both		1	1		0.467135	0.658072	-0.0693709		0.496445	0.440866	-0.196941		1.15416	0.0605926	0.6929		2.0067	0.02632	0.822602		1.02519	1	-0.395066		0.0149362	1	0.00459844		1.25917	1	-0.565664		0.556064	1	0.209293			-0.0216449	0.0213116	-0.0264824	-0.305792	0.774194
5374	Q15758	SLC1A5	Neutral amino acid transporter B(0) OS=Homo sapiens GN=SLC1A5 PE=1 SV=2	SLC1A5 (7)	SLC1A5 (6)	SLC1A5 (7;6)	Both	Plasma membrane	7	6		0.174169	0.776025	0.0416393		0.242626	0.537759	0.160493		2.10274	0.110877	0.386843		0.713656	0.0726763	0.815314		0.745206	1	-0.0634102		0.694408	1	0.127496		0.0191391	0.987326	-0.0223161		0.0926066	1	0.114181			-0.173792	0.154996	-0.0211737	0.359646	0.358692
4389	P23284	PPIB	Peptidyl-prolyl cis-trans isomerase B OS=Homo sapiens GN=PPIB PE=1 SV=2	PPIB (14)	PPIB (17)	PPIB (14;17)	Both	ER-Lumen	14	17		0.130873	0.82587	0.0319704		0.750391	0.211071	0.455499		0.685276	0.188571	0.324257		0.589261	0.0909917	0.807456		0.18289	1	-0.0839517		0.47891	1	-0.240802		0.267933	1	-0.320557		0.0737348	1	-0.101189			-0.116712	0.107907	-0.0192048	0.281831	0.177805
90	K7EM38	ACTG1	Actin, cytoplasmic 2 (Fragment) OS=Homo sapiens GN=ACTG1 PE=1 SV=1	ACTG1 (2)	ACTG1 (1)	ACTG1 (2;1)	Both		2	1		0.247634	0.268137	-0.329033		0.173128	0.571588	-0.150511		0.263691	0.771247	0.0441738		0.333752	0.124817	0.806635		0.656924	1	-0.20693		0.029493	1	-0.00855477		0.317128	1	-0.758994		0.137361	1	-0.337532			-0.162025	0.145564	-0.740022	-0.420357	0.0432147
4888	P08134	RHOC	Rho-related GTP-binding protein RhoC OS=Homo sapiens GN=RHOC PE=1 SV=1	RHOC (8)	RHOC (5)	RHOC (8;5)	Both		8	5		0.124912	0.674364	0.0742608		0.740661	0.210492	0.558889		0.694472	0.106064	0.530051		0.365706	0.122255	0.788525		0.0611091	1	0.0963017		0.07027	1	-0.148654		0.304567	1	-0.631588		0.00806131	1	0.0209982			0.105797	-0.114098	-0.106684	0.737806	0.717016
3732	Q14112	NID2	Nidogen-2 OS=Homo sapiens GN=NID2 PE=1 SV=3	NID2 (4)	NID2 (3)	NID2 (4;3)	Both		4	3		0.273581	0.595486	0.0870578		0.631333	0.463812	0.168076		0.115946	0.625421	0.0977278		1.19002	0.0474702	0.782181		0.337213	1	0.277258		0.305052	1	0.258195		0.254571	0.974494	-0.113409		1.00779	1	-0.45902			-0.013063	0.0129373	0.183736	0.0863497	-0.157235
4133	Q8IYB4	PEX5L	PEX5-related protein OS=Homo sapiens GN=PEX5L PE=1 SV=2	PEX5L (2)	PEX5L (3)	PEX5L (2;3)	Both		2	3		0.0844308	0.930119	0.0132599		0.28187	0.586806	-0.129204		4.15746	0.0287467	0.669881		0.862338	0.0718	0.768605		0.036388	1	-0.00666606		0.278886	1	-0.036961		0.227476	0.978335	0.136214		0.115435	1	0.071968			-0.0579628	0.0556891	-0.0289298	0.0101827	0.651037
5373	P43007	SLC1A4	Neutral amino acid transporter A OS=Homo sapiens GN=SLC1A4 PE=1 SV=1	SLC1A4 (5)	SLC1A4 (4)	SLC1A4 (5;4)	Both	Plasma membrane	5	4		0.983202	0.277471	0.221594		0.803193	0.289814	0.340253		2.26982	0.0905147	0.445383		2.27277	0.022449	0.767949		0.640379	1	0.19634		1.15197	1	0.285015		0.582423	1	0.174767		0.792447	1	0.296912			0.0740578	-0.0780154	0.158749	0.443398	0.403371
592	P54687	BCAT1	Branched-chain-amino-acid aminotransferase, cytosolic OS=Homo sapiens GN=BCAT1 PE=1 SV=3	BCAT1 (7)	BCAT1 (9)	BCAT1 (7;9)	Both		7	9		0.333428	0.739634	0.0535109		0.160055	0.814764	0.0478788		1.03144	0.0969756	0.5244		0.961013	0.0679149	0.766886		0.611047	1	-0.193946		0.0814871	1	-0.0220933		0.564762	1	-0.267675		0.140511	1	-0.0633828			0.0192412	-0.0194887	0.00510452	-0.0432395	0.444541
5926	P02787	TF	Serotransferrin OS=Homo sapiens GN=TF PE=1 SV=3	TF (21)	TF (27)	TF (21;27)	Both		21	27		0.305619	0.136772	1.21486		0.172654	0.678659	0.07823		0.133202	0.402518	0.215841		1.80772	0.0296577	0.763252		0.584388	1	1.08702		0.376503	1	0.600374		0.997321	1	-0.476996		0.478711	1	-0.764814			0.252234	-0.305662	0.00247941	-0.0554282	-0.287011
2621	Q9Y4L1	HYOU1	Hypoxia up-regulated protein 1 OS=Homo sapiens GN=HYOU1 PE=1 SV=1	HYOU1 (50)	HYOU1 (52)	HYOU1 (50;52)	Both	ER-Lumen	50	52		1.06061	0.473439	0.115296		0.498919	0.837847	0.0347224		1.99599	0.154719	0.320932		1.73221	0.0406176	0.759535		0.15502	1	-0.0238501		0.409439	1	0.0427576		0.483392	0.97072	-0.0747246		0.618729	1	0.101308			-0.0226766	0.0223114	0.143243	0.0129048	0.346166
5201	Q9HCN8	SDF2L1	Stromal cell-derived factor 2-like protein 1 OS=Homo sapiens GN=SDF2L1 PE=1 SV=2	SDF2L1 (3)	SDF2L1 (3)	SDF2L1 (3;3)	Both	ER-Lumen	3	3		0.207821	0.897781	0.0187457		0.485438	0.670414	0.0758985		3.00394	0.120527	0.351839		1.11826	0.0621667	0.755677		0.19536	1	-0.039625		0.140762	1	0.0578015		0.209613	0.964337	-0.0796753		0.276857	1	-0.130083			-0.0578218	0.0555588	0.0319993	0.026033	0.359136
4184	O43175	PHGDH	D-3-phosphoglycerate dehydrogenase OS=Homo sapiens GN=PHGDH PE=1 SV=4	PHGDH (33)	PHGDH (24)	PHGDH (33;24)	Both		33	24		0.26407	0.832079	-0.0335668		1.14455	0.724641	0.0581879		2.41717	0.0915522	0.456474		1.03225	0.0692308	0.738067		0.207012	1	0.0168821		0.73829	1	0.0488762		0.257322	0.967758	-0.093398		0.071195	1	0.0319066			-0.00480528	0.00478607	-0.0728312	0.0725257	0.437664
2593	P14625	HSP90B1	Endoplasmin OS=Homo sapiens GN=HSP90B1 PE=1 SV=1	HSP90B1 (92)	HSP90B1 (81)	HSP90B1 (92;81)	Both	ER-Lumen	92	81		0.855127	0.601488	0.0797233		1.13941	0.75226	0.0530691		1.57542	0.109267	0.436807		1.71132	0.0492987	0.735286		0.490347	1	-0.0641873		0.139133	1	-0.0142675		0.906625	1	-0.14717		0.141165	1	0.0564301			0.0121178	-0.0122128	0.103008	0.0399557	0.466322
5228	Q99442	SEC62	Translocation protein SEC62 OS=Homo sapiens GN=SEC62 PE=1 SV=1	SEC62 (8)	SEC62 (7)	SEC62 (8;7)	Both	ER-Membrane	8	7		1.35051	0.4027	-0.137702		0.419022	0.670677	0.0758987		2.03286	0.228854	0.229013		1.10422	0.0693034	0.730428		0.999389	1	0.0999637		0.144776	1	0.0325774		0.412138	1	-0.170521		0.287992	1	-0.115491			-0.105051	0.0978585	-0.162699	0.0182319	0.202085
787	Q13137	CALCOCO2	Calcium-binding and coiled-coil domain-containing protein 2 OS=Homo sapiens GN=CALCOCO2 PE=1 SV=1	CALCOCO2 (3)	CALCOCO2 (3)	CALCOCO2 (3;3)	Both		3	3		0.238525	0.631657	-0.0756689		0.805091	0.325801	0.264216		1.95523	0.0578211	0.602767		2.97212	0.021375	0.73024		0.282046	1	-0.121242		0.10021	1	-0.0645477		0.712807	0.984191	-0.126074		0.45411	1	0.0778852			-0.0508962	0.0491311	-0.175425	0.166896	0.533796
2355	Q8TAA5	GRPEL2	GrpE protein homolog 2, mitochondrial OS=Homo sapiens GN=GRPEL2 PE=1 SV=1	GRPEL2 (1)	GRPEL2 (1)	GRPEL2 (1;1)	Both	Mitochondrion-Mtx	1	1		0.333441	0.564228	-0.0857681		0.412251	0.43554	-0.192984		0.368865	0.202967	0.36854		2.67816	0.0265859	0.728778		0.0217446	1	0.0305071		0.0304594	1	-0.0356477		0.0186934	0.995827	-0.0115808		0.0199094	1	-0.0118752			-0.106501	0.0991157	-0.149968	-0.347529	0.0565474
720	Q9BQ61	C19orf43	Uncharacterized protein C19orf43 OS=Homo sapiens GN=C19orf43 PE=1 SV=1	C19orf43 (3)	C19orf43 (4)	C19orf43 (3;4)	Both		3	4		0.15863	0.686966	0.0672081		0.0134511	0.963969	-0.0104246		0.552258	0.150361	0.424915		0.820495	0.0823057	0.724669		0.239309	1	-0.165074		0.569229	1	-0.487625		0.733655	1	-0.513859		0.169221	1	0.108424			-0.118567	0.109491	-0.0634708	-0.228908	0.632737
1703	O14602	EIF1AY	Eukaryotic translation initiation factor 1A, Y-chromosomal OS=Homo sapiens GN=EIF1AY PE=1 SV=4	EIF1AY (8)	EIF1AY (3)	EIF1AY (8;3)	Both		8	3		0.727124	0.247387	0.290493		0.302059	0.363342	0.286186		0.347578	0.220384	0.347828		0.409945	0.121688	0.724445		0.249903	1	-0.243563		0.314731	1	-0.311994		0.20092	1	-0.334352		0.106931	1	-0.196346			-0.061159	0.0586352	0.386849	-0.000251891	0.0500014
2495	P10412	HIST1H1E	Histone H1.4 OS=Homo sapiens GN=HIST1H1E PE=1 SV=2	HIST1H1E (2)	HIST1H1E (1)	HIST1H1E (2;1)	Both	Nuclear (100% filter)	2	1		0.357118	0.245514	0.337238		0.656755	0.46203	-0.159087		0.0982057	0.508694	0.157417		2.64322	0.0267308	0.723579		0.269435	1	-0.42166		0.0536521	1	0.0993446		0.40002	1	-0.458231		0.377484	1	-0.507642			-0.199561	0.175177	0.0438498	-0.235362	-0.326757
4053	Q16822	PCK2	Phosphoenolpyruvate carboxykinase [GTP], mitochondrial OS=Homo sapiens GN=PCK2 PE=1 SV=3	PCK2 (13)	PCK2 (14)	PCK2 (13;14)	Both	Mitochondrion-Mtx	13	14		0.0896494	0.922701	0.0155292		0.321554	0.86882	-0.027682		3.68385	0.0720229	0.49151		3.90096	0.0198242	0.722524		0.81843	1	0.0766411		0.440274	1	0.0501886		0.473798	0.965492	0.0693594		0.0474533	0.999729	0.00190219			-0.0662057	0.0632609	-0.0331997	-0.0175711	0.509222
3832	Q9NXX6	NSMCE4A	Non-structural maintenance of chromosomes element 4 homolog A OS=Homo sapiens GN=NSMCE4A PE=1 SV=2	NSMCE4A (2)	NSMCE4A (1)	NSMCE4A (2;1)	Both		2	1		1.62034	0.254048	-0.230327		0.119731	0.917837	-0.0188365		1.69503	0.228417	0.233018		1.96919	0.0369524	0.721844		0.0784967	1	0.0456714		0.175191	1	-0.179082		1.00179	1	-0.299996		0.010792	1	0.0120554			-0.0685883	0.0654345	-0.22354	-0.0149201	0.207645
4766	P61224	RAP1B	Ras-related protein Rap-1b OS=Homo sapiens GN=RAP1B PE=1 SV=1	RAP1B (9)	RAP1B (8)	RAP1B (9;8)	Both	Plasma membrane	9	8		0.0995435	0.937056	0.0118231		0.945978	0.54751	0.119577		0.921685	0.274214	0.217398		1.12497	0.0676842	0.715172		0.253229	1	-0.0536447		0.821668	1	-0.200222		1.0481	1	-0.470425		0.0315393	1	-0.0275984			-0.00178164	0.00177824	0.0307153	0.0800024	0.280718
1704	O60739	EIF1B	Eukaryotic translation initiation factor 1b OS=Homo sapiens GN=EIF1B PE=1 SV=2	EIF1B (4)	EIF1B (2)	EIF1B (4;2)	Both		4	2		1.04371	0.198378	-0.342461		0.582054	0.406497	0.193208		0.488944	0.348665	0.16751		1.83239	0.0405714	0.710487		0.738799	1	-0.152194		0.50816	1	-0.08787		0.355562	0.963228	-0.0489631		0.871258	1	-0.1693			-0.206507	0.180508	-0.30361	0.19653	0.104415
2267	P59768	GNG2	Guanine nucleotide-binding protein G(I)/G(S)/G(O) subunit gamma-2 OS=Homo sapiens GN=GNG2 PE=1 SV=2	GNG2 (2)	GNG2 (2)	GNG2 (2;2)	Both		2	2		0.71004	0.246347	-0.276097		0.935127	0.222743	0.582536		0.525471	0.288191	0.218353		0.548332	0.105389	0.705574		0.11055	1	-0.100966		0.334488	1	-0.245026		0.540736	1	-0.706732		0.093757	1	-0.129077			0.0114013	-0.0114849	-0.40558	0.404883	0.0798122
6227	O43657	TSPAN6	Tetraspanin-6 OS=Homo sapiens GN=TSPAN6 PE=1 SV=1	TSPAN6 (5)	TSPAN6 (1)	TSPAN6 (5;1)	Both		5	1		0.262515	0.564292	-0.0988014		0.659606	0.284309	0.336808		1.00339	0.22901	0.256016		0.289978	0.162837	0.700191		0.257818	1	0.109592		0.082898	1	-0.0472737		0.172471	1	-0.416729		0.0780482	1	-0.225111			0.0797021	-0.0843091	0.0157621	0.200999	0.186641
4709	Q86YS6	RAB43	Ras-related protein Rab-43 OS=Homo sapiens GN=RAB43 PE=1 SV=1	RAB43 (2)	RAB43 (3)	RAB43 (2;3)	Both		2	3		0.686206	0.662571	-0.0632175		0.323475	0.784816	-0.0511913		3.56848	0.144991	0.317696		2.58486	0.0394328	0.69446		0.701257	1	-0.15804		1.82485	1	0.115645		0.587213	1	-0.224011		0.121953	1	0.0503219			-0.0212976	0.0209743	-0.0359316	-0.00276788	0.317538
6643	P54577	YARS	Tyrosine--tRNA ligase, cytoplasmic OS=Homo sapiens GN=YARS PE=1 SV=4	YARS (29)	YARS (29)	YARS (29;29)	Both		29	29		0.690089	0.3869	0.170091		0.538317	0.670666	0.0812763		1.5954	0.112584	0.424854		2.43893	0.044028	0.693418		0.183678	1	0.0219685		0.61757	1	0.075058		0.00150208	1	-0.000182211		0.9124	1	0.101203			0.0174249	-0.0176267	0.110774	0.123162	0.454206
2494	P16402	HIST1H1D	Histone H1.3 OS=Homo sapiens GN=HIST1H1D PE=1 SV=2	HIST1H1D (7)	HIST1H1D (7)	HIST1H1D (7;7)	Both		7	7		0.647716	0.296693	0.218409		0.310478	0.60737	-0.105991		0.150404	0.41258	0.198168		2.97939	0.0308421	0.692531		0.201017	1	-0.26247		0.0516925	1	0.0769204		0.374279	1	-0.43169		0.427306	1	-0.398146			-0.13586	0.124085	0.112793	-0.215349	-0.205708
2156	P41250	GARS	Glycine--tRNA ligase OS=Homo sapiens GN=GARS PE=1 SV=3	GARS (30)	GARS (27)	GARS (30;27)	Both	Golgi	30	27		0.288596	0.80693	0.039601		1.21924	0.872251	0.0269505		2.75837	0.117124	0.378161		1.72566	0.0675682	0.690311		1.17189	1	-0.0469051		0.507056	1	0.0357798		0.0834748	0.994764	-0.0125971		0.387094	1	0.0711495			-0.0133818	0.0132504	0.081238	0.0205253	0.387726
2927	O43813	LANCL1	LanC-like protein 1 OS=Homo sapiens GN=LANCL1 PE=1 SV=1	LANCL1 (1)	LANCL1 (1)	LANCL1 (1;1)	Both		1	1		1.4084	0.164938	-0.467282		0.111657	0.489733	0.272124		0.112972	0.418337	0.217801		0.947729	0.0805899	0.687295		0.33552	1	0.794338		0.0349141	1	-0.0771883		0.433198	1	-0.453426		0.432599	1	-0.292242			-0.295613	0.245078	-0.502376	0.983616	0.776214
1925	Q9H6L5	FAM134B	Reticulophagy receptor FAM134B OS=Homo sapiens GN=FAM134B PE=1 SV=1	FAM134B (4)	FAM134B (1)	FAM134B (4;1)	Both		4	1		0.696712	0.388316	0.154193		0.585741	0.285293	0.357644		1.13082	0.153296	0.341796		2.8922	0.0370508	0.686005		0.75147	1	-0.248686		0.0993041	1	-0.0528661		2.17994	1	-0.124397		0.375093	1	0.0929954			-0.140559	0.127995	0.218945	0.18227	0.255446
1478	Q02127	DHODH	Dihydroorotate dehydrogenase (quinone), mitochondrial OS=Homo sapiens GN=DHODH PE=1 SV=3	DHODH (4)	DHODH (3)	DHODH (4;3)	Both	Mitochondrion-IM	4	3		0.389242	0.761385	0.0465403		0.420158	0.795872	-0.0468715		1.5291	0.14361	0.357438		1.48832	0.0696484	0.683398		0.0199921	1	-0.00694184		0.471696	1	0.147047		0.00957441	0.998114	0.00194317		0.64066	1	0.136254			0.0386093	-0.0396456	0.00935726	-0.0815816	0.322104
2667	P01834	IGKC	Immunoglobulin kappa constant OS=Homo sapiens GN=IGKC PE=1 SV=2	IGKC (1)	IGKC (3)	IGKC (1;3)	Both		1	3		0.894797	0.343589	0.17617		0.335379	0.731823	-0.0587697		0.0306483	0.871546	0.036175		0.962772	0.0832727	0.680633		0.290673	1	0.328877		0.223732	1	0.255363		0.284663	0.99417	-0.138632		0.944743	1	-0.529964			0.0710464	-0.0746787	0.23327	-0.0104186	-0.302136
369	Q9P227	ARHGAP23	Rho GTPase-activating protein 23 OS=Homo sapiens GN=ARHGAP23 PE=1 SV=2	ARHGAP23 (5)	ARHGAP23 (1)	ARHGAP23 (5;1)	Both		5	1		0.720048	0.658373	-0.0622069		0.00817138	0.996929	-0.000827437		1.02427	0.154164	0.362132		1.12385	0.0809908	0.67802		0.555422	1	-0.133842		0.275815	1	0.0680807		0.102323	0.962115	-0.0439353		0.0921894	1	0.0521488			-0.0473375	0.0458048	-0.0359966	-0.0259657	0.293797
4592	P78330	PSPH	Phosphoserine phosphatase OS=Homo sapiens GN=PSPH PE=1 SV=2	PSPH (7)	PSPH (5)	PSPH (7;5)	Both		7	5		0.0909681	0.94922	0.00907701		0.884655	0.555759	-0.119728		0.897424	0.113516	0.465245		0.738783	0.101097	0.677425		0.211518	1	-0.0736506		0.44723	1	0.157061		0.17197	0.979874	-0.1289		0.151609	1	0.131477			-0.00338903	0.00337894	-0.0152496	-0.0811231	0.571021
2492	P16401	HIST1H1B	Histone H1.5 OS=Homo sapiens GN=HIST1H1B PE=1 SV=3	HIST1H1B (11)	HIST1H1B (13)	HIST1H1B (11;13)	Both		11	13		0.520984	0.284992	0.243315		0.258514	0.595664	-0.118663		0.152146	0.447146	0.171235		3.52197	0.0305739	0.677358		0.211071	1	-0.235506		0.0353309	1	0.0462257		0.377135	1	-0.425532		0.460297	1	-0.424443			-0.103041	0.0961109	0.106509	-0.262153	-0.172755
1022	Q9BSY4	CHCHD5	Coiled-coil-helix-coiled-coil-helix domain-containing protein 5 OS=Homo sapiens GN=CHCHD5 PE=1 SV=1	CHCHD5 (1)	CHCHD5 (1)	CHCHD5 (1;1)	Both		1	1		0.0227734	0.929499	-0.0174549		0.376591	0.285466	0.419801		0.403056	0.34126	0.199013		0.389613	0.135371	0.67101		0.346364	1	0.373798		0.147037	1	0.0783259		0.297742	1	-0.484699		0.145774	1	-0.257268			0.0475503	-0.0491394	-0.235135	0.746424	0.344808
2664	P01859	IGHG2	Immunoglobulin heavy constant gamma 2 OS=Homo sapiens GN=IGHG2 PE=1 SV=2	IGHG2 (1)	IGHG2 (1)	IGHG2 (1;1)	Both		1	1		1.44469	0.168909	0.452922		0.66302	0.3791	-0.206787		0.0568176	0.871333	0.0271058		1.98535	0.0471579	0.668249		0.705204	1	0.628765		0.493815	1	0.289084		1.28965	1	-0.221436		1.56096	1	-0.575714			0.157187	-0.176313	0.41647	-0.284902	-0.0931531
2184	Q99988	GDF15	Growth/differentiation factor 15 OS=Homo sapiens GN=GDF15 PE=1 SV=3	GDF15 (2)	GDF15 (3)	GDF15 (2;3)	Both		2	3		0.427362	0.530935	-0.098762		0.513166	0.757894	-0.0505911		0.582865	0.284183	-0.229845		3.28912	0.036672	0.664445		0.153752	1	-0.0633411		0.0544427	1	0.0210783		0.283033	0.970075	-0.0980794		1.44924	1	-0.151555			-0.0890724	0.0838398	-0.0284658	-0.0468996	-0.343967
1555	Q13217	DNAJC3	DnaJ homolog subfamily C member 3 OS=Homo sapiens GN=DNAJC3 PE=1 SV=1	DNAJC3 (10)	DNAJC3 (11)	DNAJC3 (10;11)	Both	ER-Lumen	10	11		0.152321	0.947776	-0.00939032		0.254847	0.751282	0.0614916		0.483971	0.256713	0.274197		0.486789	0.122316	0.655913		0.0223736	1	-0.0135099		0.000947019	1	0.000540499		0.220101	1	-0.265005		0.12989	1	0.207185			0.00582549	-0.00584574	-0.0115037	-0.0133611	0.115804
1389	P43146	DCC	Netrin receptor DCC OS=Homo sapiens GN=DCC PE=1 SV=2	DCC (8)	DCC (5)	DCC (8;5)	Both		8	5		0.49349	0.658436	0.0681959		0.26753	0.731076	-0.0670716		1.19014	0.342661	0.169234		1.649	0.0727573	0.642723		1.08159	1	-0.128334		0.386571	1	-0.037575		1.0989	1	-0.314081		0.779732	1	-0.138485			-0.0243753	0.0239551	0.0273308	-0.143941	0.139519
611	Q9BUT1	BDH2	3-hydroxybutyrate dehydrogenase type 2 OS=Homo sapiens GN=BDH2 PE=1 SV=2	BDH2 (2)	BDH2 (5)	BDH2 (2;5)	Both		2	5		0.00788888	0.985931	0.00258132		0.681505	0.396376	0.193881		0.74132	0.166756	0.345465		1.84245	0.0607209	0.637173		0.0140462	1	-0.00890933		0.196001	1	-0.148213		0.335326	0.973875	-0.100535		0.387192	1	-0.162411			-0.252832	0.214934	-0.0184339	0.108616	0.191069
2373	P09211	GSTP1	Glutathione S-transferase P OS=Homo sapiens GN=GSTP1 PE=1 SV=2	GSTP1 (21)	GSTP1 (25)	GSTP1 (21;25)	Both		21	25		0.120148	0.768682	-0.0498284		0.0746219	0.952629	-0.0106239		0.609491	0.110016	0.532251		1.53823	0.0709749	0.636806		0.0929908	1	0.108619		0.0193913	1	-0.0178824		0.388446	1	-0.184954		0.171341	1	0.0716857			-0.109501	0.101711	0.0719616	-0.0369809	0.756395
4233	O00625	PIR	Pirin OS=Homo sapiens GN=PIR PE=1 SV=1	PIR (2)	PIR (1)	PIR (2;1)	Both		2	1		0.75766	0.194132	0.444357		0.400102	0.685329	0.0775306		1.54732	0.0820721	0.529984		0.84661	0.104098	0.635087		0.0717357	1	0.0236491		0.837196	1	-0.196556		0.0948471	0.960222	0.0527444		0.0131316	1	0.0111496			-0.0237112	0.0233131	0.316358	0.134917	0.569257
931	Q7L3B6	CDC37L1	Hsp90 co-chaperone Cdc37-like 1 OS=Homo sapiens GN=CDC37L1 PE=1 SV=1	CDC37L1 (2)	CDC37L1 (2)	CDC37L1 (2;2)	Both		2	2		0.254139	0.579601	-0.0911565		0.299086	0.773786	0.0479172		0.373829	0.412121	0.15308		0.455431	0.132434	0.62983		0.110721	1	-0.0848223		0.508693	1	-0.23304		0.359513	1	-0.477754		0.083868	1	0.180229			-0.141096	0.12844	-0.204839	0.0101688	0.0232134
3421	P82912	MRPS11	28S ribosomal protein S11, mitochondrial OS=Homo sapiens GN=MRPS11 PE=1 SV=2	MRPS11 (3)	MRPS11 (3)	MRPS11 (3;3)	Both	Mitochondrion-Mtx	3	3		0.373186	0.493852	0.11526		0.0700919	0.906684	0.0230171		1.169	0.167773	0.31851		0.50522	0.124019	0.629488		0.0772539	1	-0.0473971		0.574823	1	-0.174364		0.334011	1	-0.3824		0.0572528	1	0.0935832			-0.0366322	0.0357027	0.0156992	-0.0702241	0.238326
5636	P09132	SRP19	Signal recognition particle 19 kDa protein OS=Homo sapiens GN=SRP19 PE=1 SV=3	SRP19 (3)	SRP19 (2)	SRP19 (3;2)	Both		3	2		0.170243	0.793206	-0.0392106		2.5646	0.206957	0.410758		1.06078	0.129549	0.3913		0.615236	0.115335	0.623905		0.0848248	1	-0.140926		0.13177	1	-0.0733637		0.40052	1	-0.364483		0.230126	1	-0.200834			0.0907526	-0.0967836	-0.105734	0.428484	0.482387
2515	O15347	HMGB3	High mobility group protein B3 OS=Homo sapiens GN=HMGB3 PE=1 SV=4	HMGB3 (8)	HMGB3 (6)	HMGB3 (8;6)	Both		8	6		0.681065	0.462356	0.117856		0.211705	0.735711	-0.0595593		1.5286	0.177886	0.290164		0.317402	0.168525	0.623885		0.837945	1	0.152904		0.103912	1	0.0420795		0.200398	1	-0.387673		0.0749082	1	0.246499			0.0819789	-0.0868628	0.106214	-0.141293	0.237677
1939	Q6UWZ7	FAM175A	BRCA1-A complex subunit Abraxas OS=Homo sapiens GN=FAM175A PE=1 SV=2	FAM175A (1)	FAM175A (2)	FAM175A (1;2)	Both	Nuclear (100% filter)	1	2		0.196597	0.344465	-0.23851		0.0817487	0.71243	0.0783573		0.166846	0.484517	0.125666		1.12871	0.0835365	0.623643		0.0876907	1	-0.056959		0.456056	1	-0.243787		0.00880874	0.998059	0.00380409		1.40405	1	-0.35464			-0.567376	0.405939	0.0638216	-0.211831	0.22762
2499	Q8N257	HIST3H2BB	Histone H2B type 3-B OS=Homo sapiens GN=HIST3H2BB PE=1 SV=3	HIST3H2BB (10)	HIST3H2BB (13)	HIST3H2BB (10;13)	Both		10	13		0.494198	0.381777	-0.180306		0.0831512	0.927385	-0.0198556		0.0769234	0.845626	0.0375696		0.457671	0.135516	0.620432		0.101046	1	0.0643788		0.00353522	1	0.00248199		0.28631	1	-0.353789		0.189	1	0.428004			-0.0175385	0.017317	-0.080544	0.0507484	0.18162
4278	Q9HBL7	PLGRKT	Plasminogen receptor (KT) OS=Homo sapiens GN=PLGRKT PE=1 SV=1	PLGRKT (3)	PLGRKT (5)	PLGRKT (3;5)	Both		3	5		1.28427	0.361037	0.157974		0.160292	0.841402	0.0356328		0.878204	0.150205	0.37184		2.91485	0.0532405	0.6182		0.367749	1	-0.136221		0.72229	1	-0.317468		1.14488	1	-0.319374		0.0105955	1	-0.00779878			-0.0282113	0.0276529	0.14126	-0.0279647	0.478795
3672	O43920	NDUFS5	NADH dehydrogenase [ubiquinone] iron-sulfur protein 5 OS=Homo sapiens GN=NDUFS5 PE=1 SV=3	NDUFS5 (1)	NDUFS5 (1)	NDUFS5 (1;1)	Both		1	1		0.0821481	0.841445	0.0301865		0.0250026	0.936472	-0.0183709		0.0861381	0.851557	-0.0301663		1.40012	0.0795472	0.618088		0.0450713	1	0.0124253		0.346458	1	0.12558		0.220988	0.974894	-0.0997011		0.641186	1	-0.282974			-0.0596026	0.057202	-0.0339063	-0.228645	-0.0196617
6075	P62328	TMSB4X	Thymosin beta-4 OS=Homo sapiens GN=TMSB4X PE=1 SV=2	TMSB4X (3)	TMSB4X (5)	TMSB4X (3;5)	Both		3	5		0.253081	0.428046	-0.1577		0.0415611	0.920531	0.0199776		0.112129	0.351982	0.309454		0.163025	0.229347	0.614108		0.015228	1	-0.0539633		0.0386397	1	0.112567		0.0879893	1	-0.374164		0.0460908	1	0.264004			0.0157327	-0.0158961	-0.360997	-0.103837	1.12319
3070	Q9NQ48	LZTFL1	Leucine zipper transcription factor-like protein 1 OS=Homo sapiens GN=LZTFL1 PE=1 SV=1	LZTFL1 (2)	LZTFL1 (3)	LZTFL1 (2;3)	Both		2	3		0.0867499	0.837609	-0.0350114		0.482154	0.791262	0.0434389		2.00836	0.106487	0.410005		1.12746	0.100613	0.603583		0.442294	1	-0.0611966		0.479543	1	-0.0733308		0.848433	1	-0.307014		0.160808	1	0.148513			0.0655989	-0.0686797	0.0826438	0.0237295	0.451014
6672	P63104	YWHAZ	14-3-3 protein zeta/delta OS=Homo sapiens GN=YWHAZ PE=1 SV=1	YWHAZ (47)	YWHAZ (37)	YWHAZ (47;37)	Both		47	37		0.0851754	0.928936	0.0131785		0.660104	0.286423	0.340976		1.34248	0.32275	0.167814		0.445876	0.140165	0.60213		0.149511	1	0.0185888		1.21708	1	-0.175047		0.368617	1	-0.475801		0.108167	1	0.223396			-0.00992054	0.00984655	-0.0182702	0.200169	0.131978
6134	P06753	TPM3	Tropomyosin alpha-3 chain OS=Homo sapiens GN=TPM3 PE=1 SV=2	TPM3 (17)	TPM3 (16)	TPM3 (17;16)	Both		17	16		0.574351	0.515784	0.09696		0.156069	0.698717	0.0775746		1.17643	0.279573	0.200485		0.648605	0.116515	0.601975		0.017147	1	-0.00687066		0.515553	1	-0.181506		0.410244	1	-0.349615		0.0936661	1	0.136498			-0.0793724	0.075186	0.0851463	-0.0764449	0.19941
1109	Q9BQT9	CLSTN3	Calsyntenin-3 OS=Homo sapiens GN=CLSTN3 PE=1 SV=1	CLSTN3 (2)	CLSTN3 (2)	CLSTN3 (2;2)	Both		2	2		0.336927	0.626657	-0.0697872		0.592536	0.496362	0.146306		0.301036	0.308437	0.240738		0.580035	0.12231	0.598282		0.219219	1	0.176472		0.0428244	1	-0.0365529		0.111352	0.963865	0.10461		0.101857	1	0.1036			-0.0153257	0.0151549	-0.118551	0.0670104	-0.01065
826	P49589	CARS	Cysteine--tRNA ligase, cytoplasmic OS=Homo sapiens GN=CARS PE=1 SV=3	CARS (31)	CARS (25)	CARS (31;25)	Both		31	25		0.587623	0.737183	0.0498609		0.951342	0.630659	0.0889163		0.826255	0.186565	0.330752		1.4996	0.09224	0.596021		0.30191	1	-0.0902176		0.0869196	1	0.0276541		0.546427	0.974877	-0.0915181		0.440975	1	0.0888613			0.030921	-0.031578	0.0751491	0.113007	0.413461
6132	P09493	TPM1	Tropomyosin alpha-1 chain OS=Homo sapiens GN=TPM1 PE=1 SV=2	TPM1 (3)	TPM1 (5)	TPM1 (3;5)	Both		3	5		0.347002	0.491683	-0.110706		0.0790206	0.86036	-0.0328978		0.352546	0.206122	0.366699		0.842902	0.106508	0.594502		0.103368	1	-0.12442		0.314713	1	-0.324645		0.490663	1	-0.329718		0.00978281	1	-0.00761488			-0.110568	0.102632	-0.0372331	-0.145807	0.674367
781	F1T0E5	CADPS	Calcium-dependent secretion activator 1 OS=Homo sapiens GN=CADPS PE=1 SV=1	CADPS (1)	CADPS (1)	CADPS (1;1)	Both		1	1		0.573913	0.285109	-0.217416		0.230378	0.595617	0.107415		0.275474	0.504558	0.106541		0.832588	0.106238	0.591361		0.376958	1	0.201068		0.370688	1	0.11099		0.136021	0.966767	0.0981399		0.135926	1	-0.0997687			-0.367402	0.292405	-0.326611	0.197196	0.0294525
2270	P63218	GNG5	Guanine nucleotide-binding protein G(I)/G(S)/G(O) subunit gamma-5 OS=Homo sapiens GN=GNG5 PE=1 SV=3	GNG5 (1)	GNG5 (1)	GNG5 (1;1)	Both	Plasma membrane	1	1		0.637987	0.247746	0.298721		0.264768	0.898575	-0.0221011		1.1885	0.0882481	0.51854		2.08517	0.0723269	0.591183		0.573885	1	0.240607		0.542358	1	0.144884		0.858595	1	0.155352		0.0139215	1	0.00641353			0.0619835	-0.0647249	0.175704	-0.0113446	0.437536
1299	Q05D32	CTDSPL2	CTD small phosphatase-like protein 2 OS=Homo sapiens GN=CTDSPL2 PE=1 SV=2	CTDSPL2 (4)	CTDSPL2 (6)	CTDSPL2 (4;6)	Both	Nuclear (100% filter)	4	6		0.0912505	0.865401	0.0286299		0.172915	0.748276	-0.0651022		0.201408	0.443524	0.161475		0.322482	0.175551	0.590799		0.0429386	1	0.0383367		0.028898	1	-0.0251235		0.129207	1	-0.234986		0.0229094	1	0.0686077			-0.0503259	0.0485991	-0.0646821	-0.180877	-0.084611
1300	P32929	CTH	Cystathionine gamma-lyase OS=Homo sapiens GN=CTH PE=1 SV=3	CTH (7)	CTH (6)	CTH (7;6)	Both		7	6		0.00508975	0.995207	0.000954675		0.60695	0.699136	-0.0638271		1.87893	0.105337	0.419788		1.89737	0.0794742	0.590767		0.160319	1	0.023921		0.220824	1	-0.0345325		0.112522	0.984228	0.0202788		0.167751	1	-0.0373788			0.0418768	-0.0431012	0.047282	-0.0344576	0.463695
1360	O00622	CYR61	Protein CYR61 OS=Homo sapiens GN=CYR61 PE=1 SV=1	CYR61 (4)	CYR61 (5)	CYR61 (4;5)	Both		4	5		0.0121156	0.985836	0.00262971		0.000697669	0.999938	6.53578e-05		0.96292	0.219553	0.272225		0.993844	0.105298	0.59032		0.373662	1	0.143395		0.0372446	1	-0.00891067		0.498941	1	-0.205966		0.280365	1	-0.165175			-0.053488	0.0515435	0.0600443	-0.00532226	0.204095
2354	Q9HAV7	GRPEL1	GrpE protein homolog 1, mitochondrial OS=Homo sapiens GN=GRPEL1 PE=1 SV=2	GRPEL1 (5)	GRPEL1 (5)	GRPEL1 (5;5)	Both	Mitochondrion-Mtx	5	5		0.451893	0.322356	0.223539		0.623541	0.513799	0.15335		0.407344	0.274296	0.262865		0.342166	0.17114	0.589982		0.122425	1	0.110968		0.352132	1	-0.217163		0.265659	1	-0.443946		0.0718352	1	0.20069			0.00145802	-0.00145863	0.0835963	0.0890109	0.076304
3965	O15460	P4HA2	Prolyl 4-hydroxylase subunit alpha-2 OS=Homo sapiens GN=P4HA2 PE=1 SV=1	P4HA2 (1)	P4HA2 (1)	P4HA2 (1;1)	Both	ER-Lumen	1	1		0.0575766	0.743028	-0.0682617		0.435014	0.35066	0.272097		0.261732	0.37647	0.19103		0.311524	0.18024	0.588981		0.00297408	0.998743	-0.00258811		0.25805	1	-0.188535		0.447029	1	-0.852775		0.131304	1	-0.254448			-0.0181008	0.0178652	-0.415171	0.087672	-0.0341101
1053	Q9UHD1	CHORDC1	Cysteine and histidine-rich domain-containing protein 1 OS=Homo sapiens GN=CHORDC1 PE=1 SV=2	CHORDC1 (13)	CHORDC1 (11)	CHORDC1 (13;11)	Both		13	11		0.150277	0.765553	-0.0492165		0.296057	0.634521	0.0971139		1.58077	0.133946	0.356538		3.38873	0.0614353	0.586327		0.954466	1	-0.208692		1.28642	1	-0.305337		1.81916	1	-0.40409		1.33726	1	-0.0444357			-0.0660848	0.0631506	-0.14946	-0.00576484	0.40676
5485	Q16637	SMN1	Survival motor neuron protein OS=Homo sapiens GN=SMN1 PE=1 SV=1	SMN1 (3)	SMN1 (3)	SMN1 (3;3)	Both		3	3		0.0804235	0.865459	0.0290583		0.039964	0.953714	0.0110335		0.353093	0.317332	0.226457		0.289948	0.190626	0.585611		0.0308112	1	-0.0382797		0.221178	1	-0.151894		0.273064	1	-0.542096		0.0618805	1	0.190583			-0.0250599	0.0246165	-0.0778479	-0.0676668	0.0342092
2325	Q13585	GPR50	Melatonin-related receptor OS=Homo sapiens GN=GPR50 PE=1 SV=3	GPR50 (1)	GPR50 (1)	GPR50 (1;1)	Both		1	1		0.397393	0.395469	-0.177593		0.49984	0.686066	0.0714877		0.863219	0.143346	0.395927		0.905422	0.10696	0.582529		0.873787	1	-0.44314		0.441819	1	-0.154868		0.706778	1	-0.34463		0.207581	1	-0.0934627			0.0245263	-0.0249346	-0.310555	0.0261583	0.295093
1215	Q14019	COTL1	Coactosin-like protein OS=Homo sapiens GN=COTL1 PE=1 SV=3	COTL1 (27)	COTL1 (21)	COTL1 (27;21)	Both	Plasma membrane	27	21		0.751918	0.647519	-0.0619609		0.808779	0.70192	0.0619419		0.478986	0.249238	0.279622		0.821154	0.111409	0.580951		0.154603	1	-0.0840334		0.46504	1	-0.270957		0.612657	1	-0.377631		0.0900883	1	0.0462743			-0.0667151	0.0637264	-0.0833671	0.0760831	0.443845
1538	Q96EY1	DNAJA3	DnaJ homolog subfamily A member 3, mitochondrial OS=Homo sapiens GN=DNAJA3 PE=1 SV=2	DNAJA3 (7)	DNAJA3 (5)	DNAJA3 (7;5)	Both	Mitochondrion-Mtx	7	5		2.3305	0.246502	0.236942		0.195617	0.759223	0.0600228		0.380152	0.310908	0.228703		0.575326	0.129463	0.579694		0.0861415	1	0.0635246		0.0725057	1	0.0463604		0.446644	1	-0.382262		0.0350475	1	0.0486828			0.0541508	-0.0562268	0.213917	-0.0345965	0.0510431
5922	Q9UGI8	TES	Testin OS=Homo sapiens GN=TES PE=1 SV=1	TES (7)	TES (11)	TES (7;11)	Both		7	11		1.07977	0.378286	-0.152005		0.699922	0.694464	0.0648751		0.897172	0.421868	0.127162		0.90302	0.10639	0.575645		0.211811	1	-0.0382178		0.0116545	1	0.00189971		0.139308	0.968292	-0.0788678		0.100174	1	0.0473927			0.06259	-0.065387	-0.111552	0.0661018	0.082445
2514	P26583	HMGB2	High mobility group protein B2 OS=Homo sapiens GN=HMGB2 PE=1 SV=2	HMGB2 (17)	HMGB2 (18)	HMGB2 (17;18)	Both		17	18		0.706247	0.498124	0.106449		0.216385	0.68547	-0.0817593		1.1291	0.105936	0.466476		2.4104	0.0716381	0.574388		0.15558	1	-0.0417321		0.245626	1	-0.0644648		1.22593	1	-0.222031		0.175635	1	0.0986272			0.0339887	-0.0347865	0.151618	-0.198863	0.546165
6066	Q5BJF2	TMEM97	Transmembrane protein 97 OS=Homo sapiens GN=TMEM97 PE=1 SV=1	TMEM97 (5)	TMEM97 (2)	TMEM97 (5;2)	Both	ER-Membrane	5	2		1.5535	0.187817	0.401865		1.20886	0.217434	0.416991		1.315	0.11598	0.415873		0.616355	0.127254	0.572663		0.129178	1	-0.0799829		0.449397	1	-0.161006		0.326102	1	-0.249844		0.0237759	1	-0.0207849			0.0218279	-0.0221492	0.351101	0.34863	0.354033
6372	Q92575	UBXN4	UBX domain-containing protein 4 OS=Homo sapiens GN=UBXN4 PE=1 SV=2	UBXN4 (10)	UBXN4 (11)	UBXN4 (10;11)	Both	ER-Membrane	10	11		0.373712	0.873354	0.0223691		0.188005	0.753528	-0.0637111		1.0598	0.109157	0.463986		1.18522	0.105397	0.572126		0.755286	1	-0.221887		0.911063	1	-0.292839		1.35193	1	-0.459116		0.312814	1	0.113844			-0.0316979	0.0309969	0.00672379	-0.167843	0.540113
3867	Q9UKK9	NUDT5	ADP-sugar pyrophosphatase OS=Homo sapiens GN=NUDT5 PE=1 SV=1	NUDT5 (6)	NUDT5 (4)	NUDT5 (6;4)	Both		6	4		0.239433	0.413387	0.176202		0.319164	0.531958	-0.14635		0.104497	0.775059	0.0476833		0.364833	0.168507	0.571564		0.197634	1	0.130255		0.256281	1	0.353753		0.133813	1	0.209872		0.0985245	1	-0.206278			-0.223464	0.193333	0.39311	-0.0163394	0.160733
5777	Q15527	SURF2	Surfeit locus protein 2 OS=Homo sapiens GN=SURF2 PE=1 SV=3	SURF2 (1)	SURF2 (4)	SURF2 (1;4)	Both		1	4		0.323495	0.667901	0.0606372		1.04625	0.406622	0.18204		0.827172	0.131559	0.410232		0.973392	0.106158	0.57148		0.514829	1	-0.235881		0.441762	1	-0.236055		0.766062	1	-0.430964		0.33875	1	-0.27354			-0.191946	0.16928	0.0429395	0.184444	0.542542
2665	P01871	IGHM	Immunoglobulin heavy constant mu OS=Homo sapiens GN=IGHM PE=1 SV=4	IGHM (8)	IGHM (7)	IGHM (8;7)	Both		8	7		0.595224	0.402295	0.153093		0.395601	0.630372	-0.0900213		0.132542	0.693697	0.0715622		3.01057	0.0677083	0.566716		0.487253	1	0.287283		0.414528	1	0.232924		0.350562	0.980989	-0.126105		0.824605	1	-0.287337			0.127933	-0.140299	0.229804	-0.162354	-0.0938203
4902	Q9UJD0	RIMS3	Regulating synaptic membrane exocytosis protein 3 OS=Homo sapiens GN=RIMS3 PE=1 SV=1	RIMS3 (5)	RIMS3 (2)	RIMS3 (5;2)	Both		5	2		0.362449	0.746549	0.0497069		0.418349	0.670248	0.0815634		0.20522	0.755717	0.0539565		1.98804	0.0891814	0.565257		0.138992	1	0.10172		0.241713	1	0.160711		0.382123	0.962904	-0.0619105		0.228263	1	0.146219			-0.0296795	0.0290627	0.00692372	0.0227254	0.134288
497	P16615	ATP2A2	Sarcoplasmic/endoplasmic reticulum calcium ATPase 2 OS=Homo sapiens GN=ATP2A2 PE=1 SV=1	ATP2A2 (46)	ATP2A2 (43)	ATP2A2 (46;43)	Both	ER-Membrane	46	43		1.55722	0.353942	0.161985		0.531808	0.391476	0.225017		1.56951	0.150263	0.337472		1.30494	0.104286	0.564841		0.132206	1	0.0972252		0.162292	1	0.0702959		0.306978	0.962976	-0.0698091		0.182091	1	-0.0409222			0.0603902	-0.0629883	0.133592	0.341188	0.378571
6081	Q9H3N1	TMX1	Thioredoxin-related transmembrane protein 1 OS=Homo sapiens GN=TMX1 PE=1 SV=1	TMX1 (10)	TMX1 (8)	TMX1 (10;8)	Both	ER-Membrane	10	8		1.08165	0.39518	-0.154109		0.531673	0.42393	0.206606		0.535614	0.317206	0.210325		0.660765	0.125353	0.562517		0.188469	1	0.149582		0.0280825	1	-0.0133972		0.539753	1	-0.379709		0.360069	1	-0.248102			0.0354739	-0.0363449	-0.187223	0.311532	0.316025
6003	Q9Y3A6	TMED5	Transmembrane emp24 domain-containing protein 5 OS=Homo sapiens GN=TMED5 PE=1 SV=1	TMED5 (3)	TMED5 (2)	TMED5 (3;2)	Both	Ergic/cisGolgi	3	2		0.00409711	0.992268	-0.00138502		0.0501362	0.930217	0.0178101		0.592301	0.545795	0.0891443		1.89973	0.0835043	0.560506		1.06307	1	-0.0526473		0.53501	1	-0.321695		0.860859	1	-0.221077		0.156545	1	-0.0602082			-0.115176	0.106592	0.0787859	0.10904	0.0970061
809	Q5T0R9	CAP1	Adenylyl cyclase-associated protein 1 (Fragment) OS=Homo sapiens GN=CAP1 PE=1 SV=8	CAP1 (1)	CAP1 (1)	CAP1 (1;1)	Both		1	1		0.442091	0.190703	0.510039		0.403961	0.433029	0.2074		0.25479	0.497715	0.124459		3.36886	0.0688776	0.556255		0.160241	1	0.0791968		0.0349231	1	0.0360947		1.67345	1	-0.217448		0.31885	1	-0.259262			0.0701504	-0.0736889	0.179322	0.0520546	-0.0277349
5441	Q08AF3	SLFN5	Schlafen family member 5 OS=Homo sapiens GN=SLFN5 PE=1 SV=1	SLFN5 (3)	SLFN5 (4)	SLFN5 (3;4)	Both		3	4		0.120432	0.935818	-0.0121849		0.217813	0.927065	0.0163561		1.36378	0.173098	0.312305		0.9841	0.109376	0.555132		0.141876	1	-0.106049		0.210249	1	0.0579402		0.0948625	0.970119	0.0335338		0.353031	1	0.129945			-0.0625899	0.0599499	0.0128525	0.0304573	0.358066
5340	P34897	SHMT2	Serine hydroxymethyltransferase, mitochondrial OS=Homo sapiens GN=SHMT2 PE=1 SV=3	SHMT2 (25)	SHMT2 (19)	SHMT2 (25;19)	Both	Mitochondrion-Mtx	25	19		2.5538	0.380564	0.142355		0.19703	0.927488	-0.0168842		1.04866	0.166999	0.342196		4.73582	0.0689162	0.555079		0.792888	1	0.199578		0.0781392	1	-0.0164114		1.02598	1	0.17203		0.375997	1	-0.0381508			0.0118981	-0.0119895	0.131843	0.00733222	0.403525
2493	P16403	HIST1H1C	Histone H1.2 OS=Homo sapiens GN=HIST1H1C PE=1 SV=2	HIST1H1C (1)	HIST1H1C (1)	HIST1H1C (1;1)	Both	Nuclear (100% filter)	1	1		0.517049	0.448071	0.131874		0.597225	0.590527	-0.102637		0.0899408	0.739417	0.0648409		3.05968	0.0721756	0.553757		0.27094	1	-0.220318		0.247944	1	0.213249		0.344073	1	-0.262568		0.414803	1	-0.480046			-0.120506	0.111144	0.0495367	-0.156713	-0.151268
1744	P55010	EIF5	Eukaryotic translation initiation factor 5 OS=Homo sapiens GN=EIF5 PE=1 SV=2	EIF5 (11)	EIF5 (13)	EIF5 (11;13)	Both		11	13		1.08213	0.667717	-0.058064		1.40945	0.635273	0.0793909		1.12184	0.151813	0.357539		1.06271	0.107012	0.553081		0.201515	1	-0.0401115		0.209056	1	-0.0416929		0.643905	1	-0.210136		0.0237114	1	0.00889407			-0.0335176	0.032736	-0.0589298	0.0921735	0.417974
5116	P06703	S100A6	Protein S100-A6 OS=Homo sapiens GN=S100A6 PE=1 SV=1	S100A6 (1)	S100A6 (1)	S100A6 (1;1)	Both		1	1		0.587639	0.245452	-0.277491		0.0678189	0.852224	-0.0355766		0.275476	0.487303	-0.11335		1.49798	0.0977077	0.546764		0.305586	1	-0.0963086		0.663531	1	-0.221135		0.64818	1	-0.26399		0.718504	1	-0.258454			-0.195224	0.171825	-0.43924	-0.175879	-0.0342346
6497	Q9BQB6	VKORC1	Vitamin K epoxide reductase complex subunit 1 OS=Homo sapiens GN=VKORC1 PE=1 SV=1	VKORC1 (1)	VKORC1 (2)	VKORC1 (1;2)	Both	ER-Membrane	1	2		0.147274	0.623485	0.0878267		0.180887	0.672888	0.0865993		0.349132	0.269529	0.275866		0.279459	0.202762	0.544472		0.0456979	1	0.0638247		0.174779	1	-0.174887		0.23099	1	-0.453521		0.0331675	1	0.106241			-0.0191932	0.0189294	-0.0959505	-0.0626093	0.033324
4853	Q04206	RELA	Transcription factor p65 OS=Homo sapiens GN=RELA PE=1 SV=2	RELA (4)	RELA (1)	RELA (4;1)	Both		4	1		0.274635	0.785254	-0.0385689		0.0796179	0.946937	0.0120717		0.526186	0.507361	-0.102075		0.308198	0.194548	0.541095		0.331738	1	0.0664399		0.0828553	1	0.0220069		0.230956	1	-0.397429		0.212334	1	-0.367801			0.055108	-0.0572598	-0.0133499	-0.0114835	-0.0447967
2279	Q96EK6	GNPNAT1	Glucosamine 6-phosphate N-acetyltransferase OS=Homo sapiens GN=GNPNAT1 PE=1 SV=1	GNPNAT1 (3)	GNPNAT1 (3)	GNPNAT1 (3;3)	Both		3	3		0.00133598	0.996752	-0.000854588		0.790677	0.215061	0.445597		1.08462	0.085	0.526325		0.756236	0.122005	0.540252		0.12005	1	0.0891547		0.425038	1	-0.264858		0.354632	1	-0.222013		0.176012	1	-0.121562			-0.17997	0.159893	-0.178793	0.592312	0.399383
1405	Q96GG9	DCUN1D1	DCN1-like protein 1 OS=Homo sapiens GN=DCUN1D1 PE=1 SV=1	DCUN1D1 (6)	DCUN1D1 (8)	DCUN1D1 (6;8)	Both		6	8		0.0418524	0.928168	0.0165337		3.65145	0.384224	0.18246		0.458162	0.442057	0.141246		0.410994	0.170562	0.538321		0.351536	1	0.100652		0.226759	1	-0.0646751		0.302767	1	-0.370338		0.041525	1	0.0868306			-0.00898876	0.00892746	-0.0972342	0.178725	0.054051
5689	Q96DR4	STARD4	StAR-related lipid transfer protein 4 OS=Homo sapiens GN=STARD4 PE=2 SV=1	STARD4 (3)	STARD4 (3)	STARD4 (3;3)	Both		3	3		1.07109	0.167	0.512687		2.17689	0.215931	0.436264	+	1.25553	0.00895652	1.07937		0.383454	0.175796	0.537548		0.0424864	1	0.0466709		0.361369	1	-0.228687		0.0981154	0.976592	0.134998		0.0404974	1	-0.0814985			-0.0750999	0.0713391	0.411112	0.391296	0.947972
5178	O75880	SCO1	Protein SCO1 homolog, mitochondrial OS=Homo sapiens GN=SCO1 PE=1 SV=1	SCO1 (3)	SCO1 (2)	SCO1 (3;2)	Both	Mitochondrion-Mtx	3	2		2.02017	0.257658	0.221994		0.0650877	0.900427	-0.0267088		1.03604	0.158082	0.343149		0.783479	0.123729	0.532865		0.484467	1	-0.137363		0.616747	1	-0.177839		0.567411	1	-0.336908		0.095575	1	-0.0507128			-0.0944594	0.0885985	0.214106	-0.14701	0.420533
5142	P49591	SARS	Serine--tRNA ligase, cytoplasmic OS=Homo sapiens GN=SARS PE=1 SV=3	SARS (40)	SARS (33)	SARS (40;33)	Both		40	33		0.731731	0.741852	0.0453429		0.814032	0.72078	0.057836		0.74739	0.219423	0.286427		4.15975	0.0772512	0.531872		0.00679154	1	0.00285774		0.0206122	1	-0.00730571		1.188	0.975872	-0.112168		0.156895	1	0.0130215			-0.0100618	0.00998559	0.0480972	0.0760986	0.379218
377	P52565	ARHGDIA	Rho GDP-dissociation inhibitor 1 OS=Homo sapiens GN=ARHGDIA PE=1 SV=3	ARHGDIA (14)	ARHGDIA (7)	ARHGDIA (14;7)	Both		14	7		0.666193	0.33433	0.186023		0.293037	0.495478	0.176026		1.46435	0.208331	0.258315		1.12141	0.107372	0.531474		0.206289	1	-0.0816713		1.80139	1	-0.292385		0.666121	1	-0.272439		0.135201	1	0.135172			-0.00990028	0.00982674	0.0945212	-0.0148548	0.260832
53	Q709F0	ACAD11	Acyl-CoA dehydrogenase family member 11 OS=Homo sapiens GN=ACAD11 PE=1 SV=2	ACAD11 (1)	ACAD11 (2)	ACAD11 (1;2)	Both		1	2		0.552872	0.356884	0.194563		0.609402	0.559613	0.131185		1.04067	0.108674	0.478333		1.12158	0.115901	0.530919		0.262196	1	-0.196916		0.575574	1	0.14708		0.090463	0.973295	-0.027373		0.91576	1	0.330879			-0.0101245	0.0100476	0.102684	0.185071	0.548267
3196	Q07820	MCL1	Induced myeloid leukemia cell differentiation protein Mcl-1 OS=Homo sapiens GN=MCL1 PE=1 SV=3	MCL1 (3)	MCL1 (1)	MCL1 (3;1)	Both		3	1		3.74889	0.135143	0.621948		0.149078	0.936092	-0.0146121		0.605788	0.120725	0.488015		1.03071	0.11434	0.530501		0.466544	1	-0.323216		0.213293	1	0.154894		0.0540282	0.984303	-0.0205489		0.128195	1	0.0614593			0.0368373	-0.0377784	0.631316	-0.00877306	0.279391
2745	Q96AB3	ISOC2	Isochorismatase domain-containing protein 2 OS=Homo sapiens GN=ISOC2 PE=1 SV=1	ISOC2 (1)	ISOC2 (2)	ISOC2 (1;2)	Both		1	2		0.594776	0.324619	-0.198751		0.209012	0.429714	0.253331		0.861681	0.121288	0.430514		0.291363	0.202344	0.529438		0.613789	1	-0.272523		0.401939	1	-0.198341		0.10559	0.985043	-0.194427		0.0556846	1	0.110312			-0.127246	0.116856	-0.305451	-0.121957	0.295734
852	O00257	CBX4	E3 SUMO-protein ligase CBX4 OS=Homo sapiens GN=CBX4 PE=1 SV=3	CBX4 (8)	CBX4 (2)	CBX4 (8;2)	Both		8	2		0.332147	0.79386	0.0374446		0.118219	0.947641	-0.0117635		1.51015	0.0850622	0.505319		3.37998	0.0817244	0.527687		0.138036	1	0.0314483		0.518038	1	0.151289		0.293565	0.963869	0.0877481		0.0834353	1	-0.036427			-0.0747265	0.0710019	0.0692519	-0.0332314	0.446661
4510	Q99633	PRPF18	Pre-mRNA-splicing factor 18 OS=Homo sapiens GN=PRPF18 PE=1 SV=1	PRPF18 (3)	PRPF18 (2)	PRPF18 (3;2)	Both		3	2		0.381288	0.237	-0.36347		0.822258	0.288645	0.315129		0.214234	0.58796	-0.0872927		1.41458	0.103467	0.527656		1.64964	1	-0.286975		0.718483	1	-0.197023		0.347791	0.97585	-0.0947597		0.503342	1	-0.143496			-0.213756	0.186023	-0.0907378	0.201447	-0.089938
1888	Q15910	EZH2	Histone-lysine N-methyltransferase EZH2 OS=Homo sapiens GN=EZH2 PE=1 SV=2	EZH2 (3)	EZH2 (1)	EZH2 (3;1)	Both		3	1		0.426373	0.548036	0.0951344		0.13261	0.605708	0.134542		0.584003	0.161445	0.393172		0.365953	0.183012	0.527031		0.340268	1	-0.223506		0.188378	1	-0.117455		0.0922392	0.976082	-0.134946		0.0288779	1	-0.0513151			0.0421784	-0.0434209	0.0244916	-0.173537	0.21358
295	Q06278	AOX1	Aldehyde oxidase OS=Homo sapiens GN=AOX1 PE=1 SV=2	AOX1 (5)	AOX1 (7)	AOX1 (5;7)	Both		5	7		0.0523406	0.9761	-0.0040796		0.115535	0.817726	-0.047828		0.0707145	0.737553	0.0707794		0.570814	0.144542	0.526968		0.227823	1	0.271522		0.120461	1	0.123424		0.204109	1	-0.174807		0.0341313	1	-0.0746672			0.0246715	-0.0250847	-0.0239618	-0.172454	-0.223692
1968	Q9UBU6	FAM8A1	Protein FAM8A1 OS=Homo sapiens GN=FAM8A1 PE=1 SV=1	FAM8A1 (2)	FAM8A1 (1)	FAM8A1 (2;1)	Both		2	1		0.403809	0.686415	-0.0596276		1.22041	0.650505	0.0753553		0.180358	0.419884	0.181432		0.469727	0.165582	0.526065		0.191365	1	-0.226533		0.196275	1	-0.197153		0.397996	1	-0.417797		0.054299	1	-0.0907311			-0.0474002	0.0458636	-0.106312	0.0893732	-0.126343
3687	P46934	NEDD4	E3 ubiquitin-protein ligase NEDD4 OS=Homo sapiens GN=NEDD4 PE=1 SV=4	NEDD4 (3)	NEDD4 (5)	NEDD4 (3;5)	Both		3	5		0.0334178	0.949197	-0.0111364		0.852966	0.556507	-0.128075		1.81844	0.1255	0.38733		0.823594	0.127477	0.524726		1.21594	1	-0.158397		0.533708	1	-0.0370064		0.326829	1	-0.180176		0.0171818	1	0.00787354			0.0154681	-0.0156258	0.0840579	-0.0963661	0.406228
742	P01031	C5	Complement C5 OS=Homo sapiens GN=C5 PE=1 SV=4	C5 (4)	C5 (3)	C5 (4;3)	Both		4	3		0.663016	0.35513	0.169619		0.0309443	0.957192	-0.00930493		0.151565	0.580572	0.103413		2.21381	0.0928254	0.523869		0.469031	1	0.339671		0.400064	1	0.268118		0.828348	0.994874	-0.128803		1.49516	1	-0.444145			0.173158	-0.196678	0.233714	-0.0686307	-0.10975
5237	Q9BQE4	SELENOS	Selenoprotein S OS=Homo sapiens GN=SELENOS PE=1 SV=3	SELENOS (4)	SELENOS (3)	SELENOS (4;3)	Both		4	3		0.0306822	0.976243	-0.00473847		0.186331	0.94375	-0.0138297		0.965575	0.149816	0.381428		1.50096	0.107335	0.522278		0.301169	1	-0.0692516		0.306992	1	-0.0694942		0.422335	0.970857	0.0700807		0.109984	1	-0.0211639			-0.00561626	0.0055908	0.0389083	-0.0365222	0.450521
3303	Q9NPA3	MID1IP1	Mid1-interacting protein 1 OS=Homo sapiens GN=MID1IP1 PE=1 SV=1	MID1IP1 (4)	MID1IP1 (1)	MID1IP1 (4;1)	Both		4	1		2.42268	0.044	0.976841		2.76295	0.235667	0.608583		0.737124	0.116165	0.466466		2.46377	0.0912097	0.519442		0.138211	1	0.101712		0.328063	1	0.181404		0.444367	1	0.348399		0.222032	1	0.156889			0.0708059	-0.0744126	1.04852	0.577088	0.631289
21	Q9NUT2	ABCB8	ATP-binding cassette sub-family B member 8, mitochondrial OS=Homo sapiens GN=ABCB8 PE=1 SV=3	ABCB8 (3)	ABCB8 (3)	ABCB8 (3;3)	Both		3	3		0.146713	0.554323	0.112636		0.708769	0.537934	0.125447		0.0468733	0.955755	-0.00949155		0.476726	0.164951	0.518216		1.14247	1	-0.106128		0.172091	1	-0.0395532		0.0134051	0.992907	-0.023195		0.258821	1	-0.260818			0.0512421	-0.0530952	0.340679	0.0759087	0.0014161
1356	Q6UW02	CYP20A1	Cytochrome P450 20A1 OS=Homo sapiens GN=CYP20A1 PE=1 SV=1	CYP20A1 (7)	CYP20A1 (6)	CYP20A1 (7;6)	Both	ER-Membrane	7	6		0.460454	0.627627	-0.0689522		0.238475	0.808463	0.041304		1.13155	0.336056	0.164671		1.77874	0.102475	0.517521		0.608892	1	-0.0933883		0.362907	1	-0.0836998		0.718831	1	-0.189274		0.337914	1	-0.0774387			-0.129004	0.118338	-0.0872607	0.00768449	0.155169
427	O15145	ARPC3	Actin-related protein 2/3 complex subunit 3 OS=Homo sapiens GN=ARPC3 PE=1 SV=3	ARPC3 (6)	ARPC3 (4)	ARPC3 (6;4)	Both		6	4		0.28496	0.870126	0.0241847		0.282199	0.783675	-0.0519691		0.87768	0.259751	0.241873		0.868574	0.128271	0.512392		0.141848	1	-0.113028		1.32808	1	-0.39389		0.941508	1	-0.498435		0.0618482	1	0.0783396			-0.00088951	0.000888361	-0.00182124	-0.109143	0.180756
2071	P02751	FN1	Fibronectin OS=Homo sapiens GN=FN1 PE=1 SV=4	FN1 (302)	FN1 (285)	FN1 (302;285)	Both		302	285		0.262	0.569164	0.0954889		0.158597	0.896536	0.023049		0.128778	0.549288	0.123638		1.10649	0.116699	0.509179		0.427332	1	0.430737		0.315918	1	0.302854		0.231114	0.972644	-0.0766376		0.872719	1	-0.352005			0.112444	-0.121874	0.205853	-0.00532969	-0.168466
3477	Q6UB35	MTHFD1L	Monofunctional C1-tetrahydrofolate synthase, mitochondrial OS=Homo sapiens GN=MTHFD1L PE=1 SV=1	MTHFD1L (18)	MTHFD1L (18)	MTHFD1L (18;18)	Both	Mitochondrion-Mtx	18	18		0.540674	0.80736	0.0336597		0.3023	0.858382	0.0303343		2.98178	0.134342	0.332769		1.33793	0.112419	0.506081		0.61913	1	0.0392122		0.547783	1	0.0972005		0.0562403	0.99158	-0.0155545		0.027879	1	0.00651069			-0.0310124	0.0303406	0.0314887	0.0584626	0.332088
5644	Q9Y5M8	SRPRB	Signal recognition particle receptor subunit beta OS=Homo sapiens GN=SRPRB PE=1 SV=3	SRPRB (8)	SRPRB (10)	SRPRB (8;10)	Both	ER-Membrane	8	10		0.0212763	0.993408	-0.00110523		2.55607	0.500008	0.131168		1.07141	0.219563	0.271102		1.14265	0.122646	0.503243		0.242513	1	0.0995531		0.0139212	1	0.00676279		0.154795	0.969004	-0.0350475		0.604279	1	-0.158095			0.0266058	-0.0270886	-0.00397311	0.12036	0.319757
2085	O43524	FOXO3	Forkhead box protein O3 OS=Homo sapiens GN=FOXO3 PE=1 SV=1	FOXO3 (5)	FOXO3 (4)	FOXO3 (5;4)	Both		5	4		1.24551	0.140667	-0.79455		0.382501	0.536999	-0.144587		1.18784	0.18139	0.302256		1.19215	0.116381	0.495499		0.573252	1	-0.324039		0.0965269	1	0.0573444		0.887244	1	-0.358111		0.0315637	1	-0.0112865			-0.133011	0.121703	-0.67114	-0.0306736	0.22588
3010	E9PEM5	LRBA	Lipopolysaccharide-responsive and beige-like anchor protein OS=Homo sapiens GN=LRBA PE=1 SV=1	LRBA (2)	LRBA (1)	LRBA (2;1)	Both		2	1		0.106387	0.626415	-0.0964141		0.309028	0.548703	0.149091		0.253513	0.580615	-0.0997966		0.543021	0.16663	0.494484		0.574834	1	0.232016		0.57299	1	0.232326		0.322474	1	-0.254118		0.0628958	1	0.0691967			0.014866	-0.0150113	0.174821	0.00364675	0.0200847
6731	O75844	ZMPSTE24	CAAX prenyl protease 1 homolog OS=Homo sapiens GN=ZMPSTE24 PE=1 SV=2	ZMPSTE24 (9)	ZMPSTE24 (7)	ZMPSTE24 (9;7)	Both		9	7		0.0225876	0.971752	0.00529432		0.318476	0.786733	0.0448843		0.512794	0.454584	0.12171		2.58799	0.102204	0.492902		0.0907517	1	0.0289391		0.444604	1	-0.117499		1.55873	0.968212	-0.0728308		0.739081	1	-0.0735313			-0.129261	0.118554	-0.0524377	0.0214316	0.0448505
2663	P01857	IGHG1	Immunoglobulin heavy constant gamma 1 OS=Homo sapiens GN=IGHG1 PE=1 SV=1	IGHG1 (5)	IGHG1 (9)	IGHG1 (5;9)	Both		5	9		1.72004	0.163746	0.483783		0.384626	0.587323	-0.109214		0.142195	0.511847	0.130922		1.02335	0.122435	0.490609		0.453233	1	0.412841		0.431543	1	0.393192		0.389483	1	-0.184095		0.804788	1	-0.450002			0.207774	-0.242647	0.415083	-0.0927025	-0.158665
3415	Q86TS9	MRPL52	39S ribosomal protein L52, mitochondrial OS=Homo sapiens GN=MRPL52 PE=1 SV=2	MRPL52 (4)	MRPL52 (2)	MRPL52 (4;2)	Both		4	2		1.00462	0.361204	0.168454		0.700948	0.605713	-0.0991857		0.886541	0.282176	0.216705		0.494495	0.173537	0.488552		0.0710283	1	0.0275873		0.0888071	1	0.0446834		0.412667	1	-0.387173		0.103136	1	0.134791			0.0632502	-0.066108	0.122941	-0.142663	0.154969
5225	O94855	SEC24D	Protein transport protein Sec24D OS=Homo sapiens GN=SEC24D PE=1 SV=2	SEC24D (6)	SEC24D (4)	SEC24D (6;4)	Both		6	4		0.226876	0.642779	0.0784069		0.200202	0.847106	-0.0375447		0.513588	0.235335	0.291542		0.598107	0.163708	0.487384		0.317027	1	-0.158818		0.115607	1	-0.0707518		0.127386	0.965493	-0.0875425		0.108141	1	0.107208			-0.0333692	0.0325945	0.183987	-0.0953217	0.137502
5422	Q15043	SLC39A14	Zinc transporter ZIP14 OS=Homo sapiens GN=SLC39A14 PE=1 SV=3	SLC39A14 (1)	SLC39A14 (1)	SLC39A14 (1;1)	Both	Plasma membrane	1	1		1.03191	0.164745	0.460579		0.0668136	0.879725	0.0290416		0.681699	0.0632877	0.777822		1.3653	0.111166	0.486182		0.0908082	1	0.10884		0.199225	1	0.238206		0.725339	1	0.265089		1.65068	1	0.39628			0.1336	-0.147148	0.306685	-0.00231321	0.430642
3801	P15559	NQO1	NAD(P)H dehydrogenase [quinone] 1 OS=Homo sapiens GN=NQO1 PE=1 SV=1	NQO1 (1)	NQO1 (1)	NQO1 (1;1)	Both		1	1		0.0106599	0.964033	0.00872389		0.676433	0.530173	-0.130195		1.70247	0.130634	-0.354146		2.10718	0.105133	0.485287		0.550182	1	0.253805		0.868262	1	-0.148163		0.447917	1	-0.134379		0.953409	1	-0.348849			-0.194992	0.171645	-0.222821	-0.121088	-0.340373
5023	O75818	RPP40	Ribonuclease P protein subunit p40 OS=Homo sapiens GN=RPP40 PE=1 SV=3	RPP40 (3)	RPP40 (1)	RPP40 (3;1)	Both		3	1		0.0837627	0.774481	-0.0520666		0.684266	0.291257	0.354097		0.887857	0.238178	0.248727		0.260183	0.218638	0.484871		0.0839034	1	0.0580358		0.109558	1	-0.053115		0.228349	1	-0.424691		0.12097	1	-0.244895			0.0989715	-0.106195	-0.237607	0.212403	0.165949
4117	Q9H792	PEAK1	Pseudopodium-enriched atypical kinase 1 OS=Homo sapiens GN=PEAK1 PE=1 SV=4	PEAK1 (1)	PEAK1 (1)	PEAK1 (1;1)	Both		1	1		0.213315	0.629348	0.0730419		1.14647	0.310173	-0.259543		0.134997	0.702498	0.0644677		1.90144	0.10526	0.4847		0.464747	1	0.22561		0.623937	1	0.297533		0.205832	0.963278	-0.0626733		0.364277	1	-0.211363			0.194038	-0.224098	0.15263	-0.260007	-0.0799811
6649	O95619	YEATS4	YEATS domain-containing protein 4 OS=Homo sapiens GN=YEATS4 PE=1 SV=1	YEATS4 (4)	YEATS4 (5)	YEATS4 (4;5)	Both		4	5		0.0107332	0.979121	-0.0037977		0.0438183	0.913386	-0.0236167		0.689994	0.300084	0.198859		0.526456	0.169201	0.482688		0.618355	1	-0.289282		0.705639	1	-0.243123		0.274943	1	-0.234479		0.0587179	1	0.07932			-0.0606792	0.0581938	-0.0933901	-0.178756	0.103959
2444	Q9UQL6	HDAC5	Histone deacetylase 5 OS=Homo sapiens GN=HDAC5 PE=1 SV=2	HDAC5 (3)	HDAC5 (3)	HDAC5 (3;3)	Both		3	3		4.59638	0.028	-0.976926		1.0313	0.31407	-0.274962		3.00406	0.164901	0.289049		3.44689	0.101748	0.482054		0.852301	1	-0.386031		0.0542559	1	0.0251634		1.03754	1	-0.701447		0.300617	1	-0.0480684			-0.0539656	0.0519874	-0.955883	-0.21554	0.269877
6617	Q9NZC7	WWOX	WW domain-containing oxidoreductase OS=Homo sapiens GN=WWOX PE=1 SV=1	WWOX (3)	WWOX (3)	WWOX (3;3)	Both		3	3		0.42363	0.669461	0.0616043		1.18048	0.614657	-0.0884457		0.640822	0.446389	0.126597		1.18661	0.123605	0.481774		0.0802167	1	-0.024288		0.378364	1	-0.0763762		0.552341	1	-0.161922		0.460565	1	-0.126338			0.0416932	-0.0429065	0.0155032	-0.0944176	0.066645
3130	Q9Y2U5	MAP3K2	Mitogen-activated protein kinase kinase kinase 2 OS=Homo sapiens GN=MAP3K2 PE=1 SV=2	MAP3K2 (1)	MAP3K2 (2)	MAP3K2 (1;2)	Both		1	2		0.626908	0.212068	0.378231		1.14587	0.387958	0.191615		0.0362254	0.850925	0.0411654		2.50771	0.105536	0.481017		0.203091	1	0.21551		0.00211859	1	0.00251407		0.883398	0.993495	0.123409		0.897273	1	-0.126594			-0.168996	0.151168	0.204025	0.144176	-0.287508
6767	Q969S3	ZNF622	Zinc finger protein 622 OS=Homo sapiens GN=ZNF622 PE=1 SV=1	ZNF622 (9)	ZNF622 (3)	ZNF622 (9;3)	Both		9	3		1.07545	0.253927	0.250114		0.0252925	0.973753	0.00706585		2.65839	0.102946	0.407687		3.25575	0.101574	0.480853		0.514697	1	0.192114		0.0883629	1	0.0289515		0.171267	0.963942	0.0393279		0.250672	1	-0.0211786			0.00466025	-0.0046725	0.191503	-0.0714282	0.376323
1377	P07108	DBI	Acyl-CoA-binding protein OS=Homo sapiens GN=DBI PE=1 SV=2	DBI (9)	DBI (9)	DBI (9;9)	Both		9	9		0.272811	0.598399	0.0882996		0.12771	0.725187	-0.0750892		0.425584	0.217309	0.330873		0.391027	0.194808	0.479748		0.135745	1	-0.11753		0.27309	1	-0.19953		0.0544811	0.963981	-0.0799017		0.119926	1	0.189161			0.0754003	-0.0795077	-0.0126599	-0.25349	0.554135
5002	P83881	RPL36A	60S ribosomal protein L36a OS=Homo sapiens GN=RPL36A PE=1 SV=2	RPL36A (2)	RPL36A (1)	RPL36A (2;1)	Both	Ribosome	2	1		0.163146	0.37692	-0.233379		1.06157	0.217978	0.424578		0.333018	0.265578	0.269569		0.472694	0.173365	0.47874		0.215213	1	-0.180461		0.661345	1	-0.623515		0.75104	1	-0.823015		0.0285475	1	0.0317326			-0.36147	0.28864	-0.691657	0.50835	-0.00496827
3905	Q16625	OCLN	Occludin OS=Homo sapiens GN=OCLN PE=1 SV=1	OCLN (1)	OCLN (1)	OCLN (1;1)	Both		1	1		2.46822	0.247501	0.231842		0.0385006	0.833462	-0.0552408		0.313438	0.413525	0.162031		3.94411	0.100684	0.478579		0.0753623	1	0.0400397		0.0807093	1	-0.0456891		1.43352	1	-0.15809		0.219692	1	-0.10507			0.0616906	-0.0644052	0.228529	-0.467893	0.00466453
3934	Q9H1P3	OSBPL2	Oxysterol-binding protein-related protein 2 OS=Homo sapiens GN=OSBPL2 PE=1 SV=1	OSBPL2 (3)	OSBPL2 (3)	OSBPL2 (3;3)	Both		3	3		0.0716945	0.865292	0.0269083		1.00363	0.387022	0.189682		0.0743248	0.804774	0.0460517		0.352071	0.202625	0.477184		0.267483	1	0.237676		0.239532	1	-0.139285		0.101514	0.973692	-0.138192		0.0840193	1	0.163111			-0.201976	0.177035	-0.0777636	0.223175	-0.138392
4096	Q15084	PDIA6	Protein disulfide-isomerase A6 OS=Homo sapiens GN=PDIA6 PE=1 SV=1	PDIA6 (27)	PDIA6 (25)	PDIA6 (27;25)	Both	ER-Lumen	27	25		1.41396	0.456558	0.114277		0.834158	0.635644	0.0810652		3.09747	0.120594	0.349871		1.01475	0.133384	0.47599		0.329786	1	-0.0590606		0.280704	1	-0.0624972		0.0663111	0.982486	-0.0224823		0.0568779	1	0.0184782			-0.0638246	0.0610821	0.0931385	0.0512702	0.369459
3162	I3L170	MAPT	Microtubule-associated protein OS=Homo sapiens GN=MAPT PE=1 SV=1	MAPT (2)	MAPT (3)	MAPT (2;3)	Both		2	3		0.147923	0.631778	0.0837479		0.189257	0.607481	0.119201		0.506585	0.313032	-0.204477		2.57381	0.1045	0.475549		0.339325	1	-0.200491		0.678301	1	-0.289438		0.711322	1	-0.410086		0.0846939	1	0.05488			-0.0679672	0.0648686	-0.0910924	-0.0776267	-0.0846893
3122	P36507	MAP2K2	Dual specificity mitogen-activated protein kinase kinase 2 OS=Homo sapiens GN=MAP2K2 PE=1 SV=1	MAP2K2 (15)	MAP2K2 (16)	MAP2K2 (15;16)	Both		15	16		0.131859	0.805183	0.0388243		0.679361	0.634961	0.083151		0.304056	0.616374	0.0793668		1.66839	0.111266	0.475035		0.131112	1	-0.0346911		0.0928406	1	-0.0273097		0.997763	1	-0.260375		0.234601	1	0.177336			-0.0883046	0.0831587	0.121105	0.0751008	0.156573
2299	P17174	GOT1	Aspartate aminotransferase, cytoplasmic OS=Homo sapiens GN=GOT1 PE=1 SV=3	GOT1 (21)	GOT1 (20)	GOT1 (21;20)	Both		21	20		1.17305	0.620133	0.06735		0.711094	0.671022	0.0735918		1.83386	0.423622	0.119815		1.25079	0.125118	0.473236		0.0546796	1	0.00349653		0.0589981	1	0.00814879		0.00710718	0.998022	0.00232515		0.288797	1	0.0883265			-0.0581543	0.0558659	0.078451	0.104914	0.135031
1070	Q8N5K1	CISD2	CDGSH iron-sulfur domain-containing protein 2 OS=Homo sapiens GN=CISD2 PE=1 SV=1	CISD2 (2)	CISD2 (1)	CISD2 (2;1)	Both	ER-Membrane	2	1		0.409002	0.631223	-0.0687285		0.055322	0.916204	-0.0224796		1.33149	0.319547	0.170479		1.36012	0.121058	0.472695		0.55394	1	-0.126369		0.299285	1	-0.0926194		0.00334511	1	0.001046		0.0213604	1	-0.010562			-0.118086	0.109081	-0.0224048	-0.14037	0.133896
6540	P04275	VWF	von Willebrand factor OS=Homo sapiens GN=VWF PE=1 SV=4	VWF (2)	VWF (3)	VWF (2;3)	Both		2	3		1.72558	0.241902	0.257923		0.320152	0.765036	-0.0496906		0.17215	0.753185	-0.0507195		0.548651	0.171942	0.470784		0.956168	1	0.376913		0.898672	1	0.317659		0.201167	0.988093	-0.156351		0.442928	1	-0.345175			0.138696	-0.153359	0.274149	-0.0724364	-0.139522
2035	P02679	FGG	Fibrinogen gamma chain OS=Homo sapiens GN=FGG PE=1 SV=3	FGG (15)	FGG (21)	FGG (15;21)	Both		15	21		0.478342	0.524231	0.0943285		0.118117	0.872264	0.0286383		0.0132262	0.968434	-0.0083451		2.35351	0.104705	0.470467		0.667473	1	0.426708		0.507869	1	0.32347		0.799685	0.977787	-0.104314		0.400508	1	-0.347089			0.144487	-0.160478	0.145462	0.0844633	-0.186149
813	P17655	CAPN2	Calpain-2 catalytic subunit OS=Homo sapiens GN=CAPN2 PE=1 SV=6	CAPN2 (19)	CAPN2 (17)	CAPN2 (19;17)	Both		19	17		0.156006	0.798722	-0.0423339		1.29546	0.316716	0.263058		1.61002	0.240119	0.231194		0.750714	0.154105	0.469707		0.0273348	1	0.013715		0.516296	1	-0.219197		0.622314	1	-0.337699		0.267612	1	-0.122516			-0.0211293	0.0208111	-0.125261	0.220731	0.261965
1288	P67870	CSNK2B	Casein kinase II subunit beta OS=Homo sapiens GN=CSNK2B PE=1 SV=1	CSNK2B (9)	CSNK2B (9)	CSNK2B (9;9)	Both		9	9		0.150544	0.76424	0.0516536		0.660684	0.229	0.451981		0.589866	0.192186	0.345351		0.594925	0.171201	0.466904		0.0154217	1	0.0143027		0.622356	1	-0.314428		0.525567	1	-0.368322		0.305134	1	-0.205101			-0.00865687	0.00859976	-0.0525819	0.290327	0.197586
4840	Q8TC12	RDH11	Retinol dehydrogenase 11 OS=Homo sapiens GN=RDH11 PE=1 SV=2	RDH11 (11)	RDH11 (9)	RDH11 (11;9)	Both	ER-Membrane	11	9		0.401252	0.568995	0.0960365		0.974135	0.608825	0.100559		1.11972	0.428318	0.135445		0.720623	0.161147	0.46531		0.395452	1	0.0695701		0.0551673	1	0.00905393		0.15775	0.971865	-0.0774895		0.161849	1	0.131324			-0.0121047	0.0119965	0.0267179	0.0807692	0.115738
2361	Q9P0R6	GSKIP	GSK3-beta interaction protein OS=Homo sapiens GN=GSKIP PE=1 SV=2	GSKIP (3)	GSKIP (3)	GSKIP (3;3)	Both		3	3		0.467904	0.167551	0.642979		1.62999	0.0851429	0.85473		0.370801	0.158354	0.46959		0.30113	0.216753	0.464693		0.157563	1	0.26923		0.0606917	1	-0.0897552		0.0774986	0.964939	0.122443		0.00711466	1	0.015802			0.106542	-0.114967	0.253961	0.760792	0.0922127
72	Q9NPJ3	ACOT13	Acyl-coenzyme A thioesterase 13 OS=Homo sapiens GN=ACOT13 PE=1 SV=1	ACOT13 (2)	ACOT13 (2)	ACOT13 (2;2)	Both	Mitochondrion-Mtx	2	2		0.0597786	0.921432	0.0156543		0.018325	0.952278	0.0129964		0.792471	0.342508	0.164178		1.8919	0.111116	0.464378		0.199575	1	-0.0713056		0.327064	1	-0.131781		0.435355	0.966361	-0.0781705		1.20124	1	-0.104561			-0.2123	0.184919	0.00915887	-0.18867	0.169748
1759	Q8IZ81	ELMOD2	ELMO domain-containing protein 2 OS=Homo sapiens GN=ELMOD2 PE=1 SV=1	ELMOD2 (11)	ELMOD2 (4)	ELMOD2 (11;4)	Both		11	4		0.774656	0.503651	0.100249		0.209598	0.847072	-0.0338282		0.516643	0.433175	0.135801		0.843065	0.144559	0.464345		0.00446761	0.999148	-0.00274974		0.0337272	1	-0.014998		0.533983	1	-0.240938		0.305483	1	-0.133314			-0.0975033	0.0912728	0.0593799	0.0101255	0.0542925
232	Q6P6C2	ALKBH5	RNA demethylase ALKBH5 OS=Homo sapiens GN=ALKBH5 PE=1 SV=2	ALKBH5 (4)	ALKBH5 (3)	ALKBH5 (4;3)	Both		4	3		0.562006	0.274173	0.251244		0.319873	0.630224	0.0977045		0.387094	0.212992	0.349017		0.322395	0.211694	0.463947		0.0720975	1	0.0941509		0.0827176	1	-0.0798547		0.134782	1	-0.202837		0.0636619	1	0.13531			0.0523654	-0.0543028	0.123514	0.00140287	0.0821135
1542	P25686	DNAJB2	DnaJ homolog subfamily B member 2 OS=Homo sapiens GN=DNAJB2 PE=1 SV=3	DNAJB2 (2)	DNAJB2 (3)	DNAJB2 (2;3)	Both		2	3		0.104594	0.857867	-0.0268214		0.328247	0.619544	-0.095359		0.686491	0.191679	0.321517		0.609396	0.166727	0.463767		0.0982286	1	-0.093235		0.00961459	1	0.0082886		0.411444	1	-0.288869		0.259024	1	0.251361			-0.0152482	0.0150793	-0.0944407	-0.0116935	0.182417
2738	Q9BUE6	ISCA1	Iron-sulfur cluster assembly 1 homolog, mitochondrial OS=Homo sapiens GN=ISCA1 PE=1 SV=1	ISCA1 (5)	ISCA1 (4)	ISCA1 (5;4)	Both		5	4		0.0365328	0.922663	0.0184596		0.0104633	0.98307	0.00558921		0.548216	0.410801	0.150801		0.460577	0.190863	0.462272		0.393537	1	-0.290937		0.748387	1	-0.214099		0.543714	1	-0.570056		0.0354773	1	0.062514			0.0101055	-0.0101704	-0.126559	-0.143943	0.0743973
1407	Q9BTE7	DCUN1D5	DCN1-like protein 5 OS=Homo sapiens GN=DCUN1D5 PE=1 SV=1	DCUN1D5 (5)	DCUN1D5 (2)	DCUN1D5 (5;2)	Both		5	2		0.367517	0.642795	-0.0717855		0.081434	0.952673	-0.0109933		0.137897	0.599698	0.102699		0.401973	0.200412	0.460649		0.114861	1	0.134326		0.027931	1	-0.0272467		0.258063	1	-0.279956		0.101388	1	0.210023			-0.0639213	0.0611708	-0.012019	-0.0478021	-0.123633
2404	P46976	GYG1	Glycogenin-1 OS=Homo sapiens GN=GYG1 PE=1 SV=4	GYG1 (6)	GYG1 (5)	GYG1 (6;5)	Both		6	5		1.04148	0.200089	-0.353407		0.710159	0.669362	-0.071086		2.54656	0.115275	0.367846		1.71493	0.119278	0.458586		1.29172	1	-0.400342		0.288098	1	-0.0932532		0.954133	1	-0.54781		0.530493	1	-0.105747			-0.0195568	0.0192831	-0.276282	-0.0990304	0.335116
442	O43150	ASAP2	Arf-GAP with SH3 domain, ANK repeat and PH domain-containing protein 2 OS=Homo sapiens GN=ASAP2 PE=1 SV=3	ASAP2 (7)	ASAP2 (4)	ASAP2 (7;4)	Both		7	4		0.112848	0.916634	-0.0175026		1.79404	0.568377	0.106186		0.911969	0.232121	0.263336		0.617201	0.172294	0.458051		0.165513	1	-0.0400831		0.461381	1	-0.10393		0.274954	1	-0.165961		0.0449745	1	-0.0326042			-0.0206541	0.0203498	-0.0635972	0.0905247	0.19934
50	P42765	ACAA2	3-ketoacyl-CoA thiolase, mitochondrial OS=Homo sapiens GN=ACAA2 PE=1 SV=2	ACAA2 (7)	ACAA2 (4)	ACAA2 (7;4)	Both	Mitochondrion-Mtx	7	4		0.249699	0.686563	-0.059367		0.704359	0.274098	0.361333		2.20486	0.105964	0.405775		0.470391	0.191309	0.457704		0.12138	1	0.176208		0.00909524	1	-0.00741587		0.413906	1	-0.374324		0.18125	1	-0.191072			0.112904	-0.122415	-0.13242	0.496492	0.447126
3292	Q96PC5	MIA2	Melanoma inhibitory activity protein 2 OS=Homo sapiens GN=MIA2 PE=1 SV=4	MIA2 (11)	MIA2 (6)	MIA2 (11;6)	Both		11	6		0.568834	0.270877	-0.252397		0.16729	0.889657	0.0240856		0.505919	0.453825	0.123856		2.34069	0.107198	0.457364		0.0504855	1	-0.0166176		0.17232	1	-0.0434267		0.734322	1	-0.186251		0.299091	1	-0.0645664			-0.0301041	0.0294701	-0.126475	0.0439324	0.197734
4828	Q5TC82	RC3H1	Roquin-1 OS=Homo sapiens GN=RC3H1 PE=1 SV=1	RC3H1 (6)	RC3H1 (4)	RC3H1 (6;4)	Both		6	4		0.128214	0.828861	-0.0311477		0.431927	0.624822	-0.0875453		0.10227	0.848963	0.0304886		0.427256	0.195484	0.456579		0.18571	1	0.0432765		0.0441754	1	-0.0109206		0.29011	1	-0.297624		0.115126	1	0.213142			-0.00158165	0.00157897	0.00593819	-0.131187	0.095628
5442	Q9GZT3	SLIRP	SRA stem-loop-interacting RNA-binding protein, mitochondrial OS=Homo sapiens GN=SLIRP PE=1 SV=1	SLIRP (9)	SLIRP (6)	SLIRP (9;6)	Both	Mitochondrion-Mtx	9	6		1.65192	0.407549	0.134606		0.0595023	0.937273	-0.0162786		0.652021	0.730622	0.049238		0.397126	0.202521	0.455699		0.104972	1	0.0713345		0.0924304	1	0.058413		0.228074	1	-0.247499		0.0515865	1	0.0789236			0.0369371	-0.0378834	0.153398	-0.0955467	0.0611597
3142	Q14244	MAP7	Ensconsin OS=Homo sapiens GN=MAP7 PE=1 SV=1	MAP7 (1)	MAP7 (1)	MAP7 (1;1)	Both		1	1		0.139899	0.723353	-0.0602681		0.996617	0.609427	-0.0888872		0.595255	0.234404	0.279568		0.27244	0.219665	0.455492		0.093861	1	0.0501409		0.122499	1	0.0520245		0.0986106	0.978642	-0.167705		0.0832342	1	0.206605			-0.041168	0.0400007	-0.191755	-0.0689668	0.150392
596	P21953	BCKDHB	2-oxoisovalerate dehydrogenase subunit beta, mitochondrial OS=Homo sapiens GN=BCKDHB PE=1 SV=2	BCKDHB (2)	BCKDHB (1)	BCKDHB (2;1)	Both	Mitochondrion-Mtx	2	1		0.345177	0.274494	-0.284458		1.39974	0.376132	0.195107		0.469047	0.260985	0.266297		0.342783	0.210146	0.455002		0.35793	1	0.199333		0.157433	1	0.0880808		0.21879	1	-0.285069		0.100412	1	-0.163804			-0.105023	0.0978338	-0.533747	0.232801	0.0995071
2098	P02794	FTH1	Ferritin heavy chain OS=Homo sapiens GN=FTH1 PE=1 SV=2	FTH1 (6)	FTH1 (5)	FTH1 (6;5)	Both	Endosome	6	5		0.54556	0.476984	0.127192		0.966647	0.212958	0.463339		1.61531	0.082917	0.522279		0.428509	0.198756	0.454391		0.265646	1	-0.0516758		0.450161	1	-0.0931778		0.317017	1	-0.318995		0.07355	1	0.082937			-0.0230695	0.0226921	0.0637594	0.379309	0.487483
6431	P54578	USP14	Ubiquitin carboxyl-terminal hydrolase 14 OS=Homo sapiens GN=USP14 PE=1 SV=3	USP14 (15)	USP14 (23)	USP14 (15;23)	Both		15	23		0.333769	0.616064	0.083166		0.918159	0.633978	0.0876057		0.613221	0.355411	0.179211		0.562032	0.180078	0.454017		0.151184	1	0.0450368		0.304087	1	-0.0965494		0.297824	1	-0.205653		0.0254328	1	0.02812			-0.0253486	0.024895	0.00795972	0.0623038	0.104139
3057	A0A0A6YYJ8	LUC7L2	Putative RNA-binding protein Luc7-like 2 OS=Homo sapiens GN=LUC7L2 PE=4 SV=1	LUC7L2 (8)	LUC7L2 (2)	LUC7L2 (8;2)	Both		8	2		1.19709	0.25987	-0.230946		0.012686	0.984268	-0.00431269		0.112231	0.609288	0.10151		0.410358	0.200384	0.452083		0.0393187	1	-0.0397757		0.158238	1	-0.140476		0.172586	1	-0.191516		0.109692	1	-0.138582			-0.196073	0.172483	-0.278289	0.0645305	0.364563
1419	Q96HY6	DDRGK1	DDRGK domain-containing protein 1 OS=Homo sapiens GN=DDRGK1 PE=1 SV=2	DDRGK1 (5)	DDRGK1 (3)	DDRGK1 (5;3)	Both	ER-Membrane	5	3		0.548	0.763192	-0.0450808		0.310075	0.881583	-0.0280051		1.56423	0.227727	0.249716		0.937696	0.152335	0.451734		0.0697949	1	-0.0141883		0.113225	1	-0.0274645		0.384045	0.978024	-0.121507		0.299252	1	-0.0974426			-0.0296235	0.0290091	-0.0203723	-0.0561909	0.224641
2263	P62873	GNB1	Guanine nucleotide-binding protein G(I)/G(S)/G(T) subunit beta-1 OS=Homo sapiens GN=GNB1 PE=1 SV=3	GNB1 (10)	GNB1 (10)	GNB1 (10;10)	Both	Plasma membrane	10	10		0.199775	0.39368	-0.211235		0.806919	0.2064	0.702854		0.651733	0.248667	0.259193		0.309717	0.216032	0.451609		0.213695	1	0.290118		0.0375177	1	0.0332954		0.224567	1	-0.322356		0.0651013	1	-0.112533			0.0878191	-0.0934522	-0.536232	0.891619	0.148763
1424	Q9NUU7	DDX19A	ATP-dependent RNA helicase DDX19A OS=Homo sapiens GN=DDX19A PE=1 SV=1	DDX19A (2)	DDX19A (1)	DDX19A (2;1)	Both		2	1		0.139829	0.813487	-0.0386046		0.439492	0.840347	0.0330002		0.805088	0.235137	0.263564		1.21941	0.135713	0.451555		0.204885	1	0.208995		0.149816	1	-0.155798		1.13996	1	-0.4097		0.586509	1	-0.231559			-0.0685347	0.0653856	-0.122637	0.0492094	0.342589
4094	P13667	PDIA4	Protein disulfide-isomerase A4 OS=Homo sapiens GN=PDIA4 PE=1 SV=2	PDIA4 (62)	PDIA4 (47)	PDIA4 (62;47)	Both	ER-Lumen	62	47		0.547463	0.554742	0.0976787		0.541155	0.952284	0.0111825		1.59297	0.190872	0.305932		1.63086	0.1371	0.45078		0.367852	1	-0.0185918		0.163118	1	-0.0119778		0.697899	0.9594	-0.0485242		0.170453	1	0.0137924			0.0033357	-0.00334136	0.144372	0.00531701	0.319416
2669	Q13123	IK	Protein Red OS=Homo sapiens GN=IK PE=1 SV=3	IK (13)	IK (15)	IK (13;15)	Both		13	15		0.952413	0.60149	-0.0731905		0.0445888	0.935777	-0.0176509		0.446937	0.468893	0.124545		0.364607	0.209059	0.450591		0.162695	1	-0.0598942		0.0106028	1	0.00320103		0.255652	1	-0.306321		0.0905048	1	0.174967			-0.0723957	0.0688931	-0.0776602	-0.131837	0.0390502
5529	P55769	SNU13	NHP2-like protein 1 OS=Homo sapiens GN=SNU13 PE=1 SV=3	SNU13 (6)	SNU13 (5)	SNU13 (6;5)	Both		6	5		0.588692	0.246761	-0.304714		3.54483	0.606085	0.0883055		0.786463	0.267295	0.242171		0.474414	0.194211	0.450558		0.0834972	1	0.0519153		0.0079612	1	-0.00184559		0.180073	0.994581	-0.157641		0.0258458	1	-0.0293898			-0.00513947	0.00511789	-0.435541	0.0885683	0.177926
3113	P55145	MANF	Mesencephalic astrocyte-derived neurotrophic factor OS=Homo sapiens GN=MANF PE=1 SV=3	MANF (8)	MANF (8)	MANF (8;8)	Both	ER-Lumen	8	8		0.800611	0.268653	0.227439		0.541479	0.485824	0.157102		2.20638	0.0848584	0.467124		1.01649	0.139614	0.447286		0.231526	1	0.072095		1.17496	1	0.192868		0.106751	0.966216	-0.0437549		0.0209491	1	0.00959505			0.121585	-0.132694	0.133802	0.239193	0.4269
618	Q93088	BHMT	Betaine--homocysteine S-methyltransferase 1 OS=Homo sapiens GN=BHMT PE=1 SV=2	BHMT (3)	BHMT (2)	BHMT (3;2)	Both		3	2		0.432124	0.402632	-0.165693		0.423098	0.433963	0.201957		0.141434	0.726257	-0.0619443		2.8	0.108812	0.446984		0.61925	1	0.28112		0.466904	1	0.206133		1.25657	1	-0.122477		0.306546	1	-0.210932			-0.112627	0.104404	-0.285327	0.343402	-0.196174
1526	O00548	DLL1	Delta-like protein 1 OS=Homo sapiens GN=DLL1 PE=1 SV=2	DLL1 (1)	DLL1 (1)	DLL1 (1;1)	Both		1	1		2.4859	0.217488	0.285671		0.0594824	0.832771	0.0482557		0.577532	0.115289	0.516951		0.573076	0.181872	0.446914		0.00172094	0.999331	0.00193372		0.351623	1	-0.275557		0.727697	1	-0.564668		0.565356	1	-0.448038			-0.0753524	0.0715671	0.289078	-0.189229	0.282079
4611	P06454	PTMA	Prothymosin alpha OS=Homo sapiens GN=PTMA PE=1 SV=2	PTMA (4)	PTMA (1)	PTMA (4;1)	Both		4	1		0.167384	0.838815	-0.028833		0.0488738	0.851876	0.043496		2.09668	0.13233	0.343981		0.537565	0.183931	0.445697		0.124403	1	-0.0680393		0.585731	1	-0.226051		0.449139	1	-0.362126		0.0674631	1	0.0701075			0.0288669	-0.0294375	-0.0637241	-0.216056	0.350445
3529	O14950	MYL12B	Myosin regulatory light chain 12B OS=Homo sapiens GN=MYL12B PE=1 SV=2	MYL12B (21)	MYL12B (23)	MYL12B (21;23)	Both	Actin binding proteins	21	23		0.89207	0.742689	0.0443811		0.926535	0.779655	-0.0457476		0.469062	0.278062	0.250873		0.943093	0.153981	0.445553		0.168945	1	-0.0833352		0.32619	1	-0.163743		0.830622	1	-0.274554		0.0254957	1	-0.00870204			-0.00823814	0.00818632	0.0528839	-0.0456169	0.400867
807	P27824	CANX	Calnexin OS=Homo sapiens GN=CANX PE=1 SV=2	CANX (62)	CANX (67)	CANX (62;67)	Both	ER-Membrane	62	67		0.814375	0.475932	0.117887		0.196142	0.896385	0.0250131		1.39181	0.413489	0.128631		1.4023	0.136514	0.444153		0.122576	1	-0.0202997		0.417499	1	-0.058219		0.528196	0.970747	-0.090816		0.00570869	0.999244	-0.00264016			-0.033686	0.0328966	0.0778468	-0.0139906	0.152841
5618	Q14534	SQLE	Squalene monooxygenase OS=Homo sapiens GN=SQLE PE=1 SV=3	SQLE (15)	SQLE (15)	SQLE (15;15)	Both	ER-Membrane	15	15		0.0896786	0.952654	-0.00826985		0.788229	0.359141	0.236013		3.99621	0.0843621	0.436481		0.754096	0.167925	0.443896		0.816432	1	-0.090156		0.309368	1	0.0683835		0.00410041	0.997888	-0.00198269		0.4485	1	0.282674			0.04813	-0.0497593	0.0128131	0.162281	0.421334
3118	A6NCE7	MAP1LC3B2	Microtubule-associated proteins 1A/1B light chain 3 beta 2 OS=Homo sapiens GN=MAP1LC3B2 PE=2 SV=1	MAP1LC3B2 (8)	MAP1LC3B2 (7)	MAP1LC3B2 (8;7)	Both		8	7		0.137478	0.917975	0.0155222		1.41547	0.502603	0.1352		0.231627	0.807868	0.03783		1.48317	0.127144	0.44386		0.418969	1	-0.0655664		0.0313818	1	0.00519832		0.355936	0.96595	-0.073687		0.211215	1	0.0455351			-0.0699236	0.0666494	-0.00209842	0.13574	-0.0106673
3209	Q96AQ8	MCUR1	Mitochondrial calcium uniporter regulator 1 OS=Homo sapiens GN=MCUR1 PE=1 SV=1	MCUR1 (1)	MCUR1 (1)	MCUR1 (1;1)	Both	Mitochondrion-Mtx	1	1		0.99162	0.187907	-0.420663		0.365881	0.510345	0.145392		0.0998782	0.776708	-0.045628		0.969352	0.138235	0.443764		0.558681	1	-0.165534		0.359175	1	-0.12109		0.423011	1	-0.328398		0.233514	1	-0.13366			-0.381888	0.301494	-0.318169	0.207297	0.0119534
4378	Q15181	PPA1	Inorganic pyrophosphatase OS=Homo sapiens GN=PPA1 PE=1 SV=2	PPA1 (21)	PPA1 (15)	PPA1 (21;15)	Both		21	15		0.0329695	0.971509	-0.00537147		0.671567	0.287621	0.342219		2.3484	0.20103	0.255954		0.542047	0.189428	0.442435		0.106041	1	0.0750939		0.375982	1	-0.158376		0.495563	1	-0.369015		0.00300669	0.999773	-0.00330292			0.0557943	-0.0580017	-0.048509	0.469767	0.280326
384	Q92974	ARHGEF2	Rho guanine nucleotide exchange factor 2 OS=Homo sapiens GN=ARHGEF2 PE=1 SV=4	ARHGEF2 (18)	ARHGEF2 (18)	ARHGEF2 (18;18)	Both		18	18		3.62515	0.239016	0.252682		0.804103	0.546431	0.133849		2.52163	0.155173	0.312307		0.665214	0.175863	0.442013		0.204974	1	0.0300002		0.397416	1	0.0414447		0.217965	0.979954	0.136327		0.130599	1	0.0693911			-0.0094972	0.00942903	0.263172	0.1737	0.329324
5925	Q9Y6I9	TEX264	Testis-expressed protein 264 OS=Homo sapiens GN=TEX264 PE=1 SV=1	TEX264 (5)	TEX264 (6)	TEX264 (5;6)	Both	ER-Membrane	5	6		0.796961	0.418176	0.149136		0.0117808	0.984296	-0.00519785		1.11888	0.300854	0.203475		4.96412	0.104439	0.441909		0.0498068	1	0.0154512		0.0259368	1	0.00588966		1.35876	0.964801	-0.0350922		0.131867	1	0.022013			-0.0163511	0.0161578	0.107534	-0.128773	0.172453
131	P55263	ADK	Adenosine kinase OS=Homo sapiens GN=ADK PE=1 SV=2	ADK (10)	ADK (11)	ADK (10;11)	Both		10	11		0.470661	0.421583	0.145683		1.45537	0.279337	0.270727		0.65884	0.155584	0.389024		0.317552	0.217129	0.440159		0.113749	1	0.0794892		0.128591	1	-0.0695552		0.233575	1	-0.318886		0.108093	1	-0.174044			0.101739	-0.10939	0.0456085	0.214666	0.224182
5283	Q8WTS6	SETD7	Histone-lysine N-methyltransferase SETD7 OS=Homo sapiens GN=SETD7 PE=1 SV=1	SETD7 (1)	SETD7 (2)	SETD7 (1;2)	Both		1	2		0.582347	0.490685	0.112774		0.595191	0.275761	-0.386278		0.150144	0.522584	0.130371		0.869734	0.159676	0.43962		0.0156722	1	-0.0256123		0.194765	1	0.168171		0.0427055	0.98092	-0.0245847		0.539902	1	-0.323993			0.0395769	-0.0406671	0.0522624	-0.557815	-0.134636
933	P60953	CDC42	Cell division control protein 42 homolog OS=Homo sapiens GN=CDC42 PE=1 SV=2	CDC42 (7)	CDC42 (9)	CDC42 (7;9)	Both	Plasma membrane	7	9		0.0866718	0.841267	0.0306585		1.01447	0.375092	0.200515		0.14138	0.834778	-0.0330445		1.77151	0.122332	0.43878		1.23162	1	0.0259813		0.586214	1	-0.151034		0.59069	1	-0.145189		0.285926	1	-0.0642352			-0.21243	0.185017	-0.0652143	0.159937	-0.0364826
3657	O75438	NDUFB1	NADH dehydrogenase [ubiquinone] 1 beta subcomplex subunit 1 OS=Homo sapiens GN=NDUFB1 PE=1 SV=1	NDUFB1 (2)	NDUFB1 (1)	NDUFB1 (2;1)	Both		2	1		0.351003	0.378822	0.184684		0.277356	0.443942	0.2139		0.60577	0.476631	-0.107592		0.371532	0.210678	0.438102		0.104936	1	0.0156468		0.35688	1	-0.0839205		0.233835	1	-0.268917		0.0496101	1	0.0808615			-0.136196	0.124365	0.0176016	-0.0277458	-0.0677186
1702	Q8N9N8	EIF1AD	Probable RNA-binding protein EIF1AD OS=Homo sapiens GN=EIF1AD PE=1 SV=1	EIF1AD (6)	EIF1AD (5)	EIF1AD (6;5)	Both		6	5		0.453729	0.473138	-0.1218		1.21507	0.455207	0.154641		0.0995459	0.900738	0.0189279		1.82337	0.122303	0.43802		0.00743423	0.99858	-0.00122607		0.339481	1	0.0742243		0.0390021	0.995744	0.0113344		0.745901	1	0.194625			-0.0974182	0.0911982	-0.0409405	0.158499	0.058089
894	O95273	CCNDBP1	Cyclin-D1-binding protein 1 OS=Homo sapiens GN=CCNDBP1 PE=1 SV=2	CCNDBP1 (1)	CCNDBP1 (1)	CCNDBP1 (1;1)	Both		1	1		0.382767	0.287174	-0.266735		0.0975878	0.614566	-0.142892		0.668432	0.173751	0.365331		6.22695	0.107043	0.436905		0.80562	1	-0.369843		0.16889	1	0.0709811		1.22162	1	-0.180448		0.104118	1	0.0143995			-0.00376238	0.00375019	-0.0636657	0.293965	0.493447
3966	P07237	P4HB	Protein disulfide-isomerase OS=Homo sapiens GN=P4HB PE=1 SV=3	P4HB (47)	P4HB (36)	P4HB (47;36)	Both	ER-Lumen	47	36		2.39182	0.348427	0.159332		0.524354	0.631062	0.0932684		2.65699	0.249166	0.211904		3.99404	0.107382	0.436868		0.0364766	1	-0.00945546		0.464754	1	-0.0595662		0.853153	0.965981	-0.0362904		0.706487	1	0.0284692			-0.0389053	0.0378598	0.168008	0.0393572	0.216375
5137	Q9NR31	SAR1A	GTP-binding protein SAR1a OS=Homo sapiens GN=SAR1A PE=1 SV=1	SAR1A (3)	SAR1A (4)	SAR1A (3;4)	Both		3	4		0.530042	0.490793	0.11819		2.23073	0.350238	0.205683		1.19094	0.185846	0.308311		0.552026	0.190537	0.4362		0.0208281	1	0.00577796		0.0184842	1	0.00489363		0.0561238	0.969111	0.0402322		0.11001	1	-0.0765284			-0.0147384	0.01458	0.0527571	0.226654	0.255905
2915	P25391	LAMA1	Laminin subunit alpha-1 OS=Homo sapiens GN=LAMA1 PE=1 SV=2	LAMA1 (36)	LAMA1 (43)	LAMA1 (36;43)	Both		36	43		0.259063	0.508292	0.122044		0.453257	0.769191	-0.0477715		0.0513793	0.810499	0.0510793		0.949887	0.154734	0.434931		0.443103	1	0.447373		0.387658	1	0.383921		0.256212	0.967833	-0.0858919		0.787982	1	-0.393356			0.0890198	-0.094814	0.265458	-0.0242113	-0.238354
67	Q8N6N7	ACBD7	Acyl-CoA-binding domain-containing protein 7 OS=Homo sapiens GN=ACBD7 PE=1 SV=1	ACBD7 (2)	ACBD7 (1)	ACBD7 (2;1)	Both		2	1		2.12422	0.219392	-0.285975		1.08717	0.363425	-0.217263		4.10608	0.0790142	0.454789		0.723669	0.173741	0.434905		0.440458	1	0.0913186		0.187534	1	-0.0789187		0.234756	1	-0.149623		0.240225	1	-0.132695			-0.0570009	0.0548	-0.314288	-0.264749	0.443049
3847	Q9BSD7	NTPCR	Cancer-related nucleoside-triphosphatase OS=Homo sapiens GN=NTPCR PE=1 SV=1	NTPCR (3)	NTPCR (3)	NTPCR (3;3)	Both		3	3		0.601156	0.491101	0.120219		0.0863003	0.821591	-0.0488583		0.443208	0.347343	0.193719		1.30398	0.150518	0.434674		0.117788	1	-0.055874		0.120232	1	-0.0588283		1.15976	1	-0.253304		0.884247	1	-0.113804			0.0067885	-0.00681627	0.0700962	-0.21682	0.316873
6656	Q96EC8	YIPF6	Protein YIPF6 OS=Homo sapiens GN=YIPF6 PE=1 SV=2	YIPF6 (1)	YIPF6 (1)	YIPF6 (1;1)	Both		1	1		0.0706321	0.688603	0.0796983		0.445325	0.378166	0.239721		0.00607008	0.976992	-0.00749106		0.849594	0.157791	0.434442		0.158094	1	0.242027		0.0544947	1	0.0783745		0.700228	1	-0.331177		0.143545	1	-0.173671			0.122034	-0.133231	0.405918	0.0719234	0.330195
834	P42574	CASP3	Caspase-3 OS=Homo sapiens GN=CASP3 PE=1 SV=2	CASP3 (3)	CASP3 (4)	CASP3 (3;4)	Both		3	4		1.23309	0.382091	-0.147074		0.209324	0.731812	-0.0656054		2.03191	0.219011	0.240712		2.85904	0.115525	0.43273		0.650518	1	-0.235914		0.560431	1	-0.225021		0.641035	1	-0.353113		0.00456144	0.999501	-0.00202718			-0.101354	0.0946405	-0.18276	-0.163392	0.245024
3647	O95182	NDUFA7	NADH dehydrogenase [ubiquinone] 1 alpha subcomplex subunit 7 OS=Homo sapiens GN=NDUFA7 PE=1 SV=3	NDUFA7 (6)	NDUFA7 (5)	NDUFA7 (6;5)	Both	Mitochondrion-Mtx	6	5		0.225292	0.755264	-0.0453648		0.0971644	0.924207	-0.0173358		0.242533	0.538265	0.109128		2.66948	0.11622	0.432668		0.06066	1	-0.0292964		0.0932334	1	-0.0434959		1.01463	0.972238	-0.100904		0.00586504	1	-0.000739932			-0.0684082	0.0652703	0.00654164	-0.0554652	0.245153
905	P78371	CCT2	T-complex protein 1 subunit beta OS=Homo sapiens GN=CCT2 PE=1 SV=4	CCT2 (56)	CCT2 (55)	CCT2 (56;55)	Both		56	55		0.455669	0.805871	0.0357984		0.0178044	0.98927	-0.00347715		0.865146	0.458519	0.121098		0.926568	0.164472	0.429897		0.0289436	1	-0.0108799		0.657562	1	-0.111404		0.678365	1	-0.247487		0.156011	1	0.131282			-0.0298065	0.0291846	0.0110508	-0.0581305	0.156656
1376	Q96EP5	DAZAP1	DAZ-associated protein 1 OS=Homo sapiens GN=DAZAP1 PE=1 SV=1	DAZAP1 (3)	DAZAP1 (3)	DAZAP1 (3;3)	Both		3	3		2.42114	0.219932	-0.283232		0.0075279	0.989995	-0.00369192		1.81678	0.511082	0.093175		0.274678	0.227841	0.429777		0.210406	1	-0.0693075		0.511536	1	-0.0745594		0.222307	1	-0.344473		0.0908221	1	-0.148982			0.0202282	-0.0205029	-0.305718	-0.140534	0.0874387
4092	H7BZJ3	PDIA3	Protein disulfide-isomerase A3 (Fragment) OS=Homo sapiens GN=PDIA3 PE=1 SV=1	PDIA3 (3)	PDIA3 (3)	PDIA3 (3;3)	Both		3	3		0.789666	0.64387	-0.062737		0.47818	0.592726	-0.109241		1.02287	0.358605	0.157194		1.34716	0.140115	0.427788		0.504767	1	0.0776966		0.441487	1	0.0701493		0.101732	0.984124	-0.020926		0.12342	1	-0.0248529			-0.0415808	0.0403906	-0.0841925	-0.0407849	0.199738
6332	P63279	UBE2I	SUMO-conjugating enzyme UBC9 OS=Homo sapiens GN=UBE2I PE=1 SV=1	UBE2I (10)	UBE2I (5)	UBE2I (10;5)	Both		10	5		0.238557	0.498158	0.130677		2.89809	0.346053	0.208727		0.896911	0.129105	0.42561		0.57099	0.192551	0.42692		0.0663692	1	0.0331092		0.515641	1	-0.158915		0.353811	1	-0.223302		0.0619458	1	-0.0636686			-0.00170957	0.00170661	-0.0369129	0.222583	0.33272
3653	Q9BU61	NDUFAF3	NADH dehydrogenase [ubiquinone] 1 alpha subcomplex assembly factor 3 OS=Homo sapiens GN=NDUFAF3 PE=1 SV=1	NDUFAF3 (2)	NDUFAF3 (4)	NDUFAF3 (2;4)	Both	Mitochondrion-IM	2	4		0.0079353	0.976144	-0.00526872		0.160546	0.566441	0.155976		0.18542	0.412485	0.182467		0.911244	0.157554	0.426014		0.152549	1	-0.159143		0.0788732	1	-0.0889749		0.453616	1	-0.193541		0.262883	1	-0.123017			0.0236265	-0.0240045	-0.191386	-0.145329	-0.124296
3567	Q9UJ70	NAGK	N-acetyl-D-glucosamine kinase OS=Homo sapiens GN=NAGK PE=1 SV=4	NAGK (16)	NAGK (10)	NAGK (16;10)	Both		16	10		0.977348	0.766838	0.0399424		0.325701	0.527273	0.161443		0.293595	0.465998	0.137233		0.50374	0.200647	0.423724		0.236286	1	-0.12535		0.3298	1	-0.152795		0.340065	1	-0.261367		0.0782678	1	-0.0688268			-0.0235367	0.0231444	0.0490961	0.0124614	-0.00461953
3991	Q9ULE6	PALD1	Paladin OS=Homo sapiens GN=PALD1 PE=1 SV=3	PALD1 (3)	PALD1 (7)	PALD1 (3;7)	Both		3	7		0.121877	0.807171	-0.0375436		0.705639	0.587318	0.104874		0.952678	0.213634	0.268516		0.772848	0.170284	0.42354		0.230365	1	0.104427		0.225327	1	-0.0614409		0.0518267	0.9732	-0.0287874		0.19462	1	-0.0932733			-0.163577	0.146816	-0.127117	0.0919941	0.18079
617	Q9NYM9	BET1L	BET1-like protein OS=Homo sapiens GN=BET1L PE=1 SV=1	BET1L (1)	BET1L (1)	BET1L (1;1)	Both		1	1		0.128217	0.432911	0.180701		0.285274	0.208337	0.831398		0.530458	0.116385	0.48842		0.298121	0.216635	0.422223		0.197296	1	-0.282608		0.236104	1	-0.331534		0.189873	1	-0.247334		0.0280592	1	0.0395818			0.232522	-0.277143	0.376025	-0.212196	0.399084
1683	P26641	EEF1G	Elongation factor 1-gamma OS=Homo sapiens GN=EEF1G PE=1 SV=3	EEF1G (28)	EEF1G (25)	EEF1G (28;25)	Both		28	25		0.396829	0.743181	-0.0465856		1.44296	0.55615	0.114098		0.193876	0.911652	0.0164565		0.374044	0.216222	0.4218		0.386081	1	0.0998015		0.0114789	1	0.00272041		0.277249	1	-0.302198		0.176165	1	0.389855			-0.00636638	0.00633447	-0.0128846	0.116548	0.0146054
3583	Q8WUY8	NAT14	N-acetyltransferase 14 OS=Homo sapiens GN=NAT14 PE=1 SV=1	NAT14 (1)	NAT14 (2)	NAT14 (1;2)	Both		1	2		0.220476	0.564114	0.10236		0.0448401	0.942721	0.0153035		2.71656	0.128775	0.340545		0.480399	0.203646	0.420769		0.384539	1	0.0825899		0.035309	1	0.00590901		0.0657082	0.961622	0.0585497		0.106691	1	-0.0967468			0.0712054	-0.0748543	0.243584	-0.0827184	0.329193
695	Q9H0W9	C11orf54	Ester hydrolase C11orf54 OS=Homo sapiens GN=C11orf54 PE=1 SV=1	C11orf54 (3)	C11orf54 (7)	C11orf54 (3;7)	Both		3	7		1.40392	0.607646	-0.070981		0.0375982	0.935548	0.0190241		2.18615	0.186735	0.278479		0.707822	0.18185	0.420553		0.901988	1	-0.117332		0.68634	1	-0.231565		0.463081	1	-0.212751		0.134834	1	-0.0628181			-0.0482549	0.0466638	-0.0686946	-0.126299	0.302682
2177	P48507	GCLM	Glutamate--cysteine ligase regulatory subunit OS=Homo sapiens GN=GCLM PE=1 SV=1	GCLM (3)	GCLM (2)	GCLM (3;2)	Both		3	2		0.564871	0.397998	0.159591		0.146233	0.713074	0.0762599		2.04233	0.171635	0.290017		2.63319	0.122488	0.420453		0.118789	1	-0.0950877		0.553987	1	-0.0859301		0.0726071	0.9987	0.00298697		0.161962	1	-0.027703			-0.0189716	0.0187135	0.0706754	0.231699	0.322214
1725	O75822	EIF3J	Eukaryotic translation initiation factor 3 subunit J OS=Homo sapiens GN=EIF3J PE=1 SV=2	EIF3J (11)	EIF3J (10)	EIF3J (11;10)	Both		11	10		0.960002	0.34457	0.185658		0.182139	0.900344	0.024635		0.204235	0.611903	0.0918253		0.457344	0.207526	0.419684		0.00244423	0.998622	-0.00127195		0.0526224	1	-0.0288231		0.302706	1	-0.255873		0.0321423	1	0.0362476			-0.0145341	0.0143801	0.143563	-0.016917	-0.0459479
957	Q96JB5	CDK5RAP3	CDK5 regulatory subunit-associated protein 3 OS=Homo sapiens GN=CDK5RAP3 PE=1 SV=2	CDK5RAP3 (6)	CDK5RAP3 (7)	CDK5RAP3 (6;7)	Both	ER-Membrane	6	7		0.520635	0.574061	0.0840924		0.754422	0.586552	-0.107024		1.34648	0.308538	0.180099		0.843714	0.171089	0.419679		0.25465	1	0.0447571		0.0305907	1	0.00792342		0.200176	0.96857	-0.0751447		0.148507	1	-0.0702743			-0.0795924	0.0753837	0.133026	-0.152128	0.140596
5200	Q99470	SDF2	Stromal cell-derived factor 2 OS=Homo sapiens GN=SDF2 PE=1 SV=2	SDF2 (7)	SDF2 (1)	SDF2 (7;1)	Both	ER-Lumen	7	1		0.734584	0.533573	0.0958192		0.458704	0.696545	0.0721089		0.313921	0.588387	0.0942171		0.561982	0.194976	0.419508		0.1453	1	0.162063		0.0496714	1	-0.0218527		0.204215	0.980179	-0.1297		0.0246799	1	0.0248339			-0.0309007	0.0302335	0.132068	0.0246145	0.00288213
4164	O15173	PGRMC2	Membrane-associated progesterone receptor component 2 OS=Homo sapiens GN=PGRMC2 PE=1 SV=1	PGRMC2 (8)	PGRMC2 (9)	PGRMC2 (8;9)	Both	ER-Membrane	8	9		1.30547	0.359554	0.158344		0.579489	0.688487	0.0666824		2.06483	0.151655	0.315262		2.78988	0.122381	0.417078		0.410726	1	-0.0516706		0.326287	1	-0.041581		1.03568	1	-0.144303		0.0854081	1	0.0217987			0.0392472	-0.0403189	0.126305	0.0583522	0.274844
6756	Q96ME7	ZNF512	Zinc finger protein 512 OS=Homo sapiens GN=ZNF512 PE=1 SV=2	ZNF512 (4)	ZNF512 (4)	ZNF512 (4;4)	Both	Nuclear (100% filter)	4	4		0.562088	0.268388	0.2609		0.0345655	0.936095	0.0186604		0.156499	0.393245	0.213804		0.269043	0.229694	0.416197		0.228132	1	-0.308387		0.23521	1	0.317932		0.251614	1	-0.387541		0.298638	1	-0.462911			-0.0249735	0.0245332	0.131906	0.171138	-0.202937
1523	O14490	DLGAP1	Disks large-associated protein 1 OS=Homo sapiens GN=DLGAP1 PE=1 SV=1	DLGAP1 (4)	DLGAP1 (3)	DLGAP1 (4;3)	Both		4	3		0.384756	0.479501	-0.129456		0.348277	0.608111	0.108646		0.926591	0.287886	0.212458		1.65426	0.14064	0.415584		1.0531	1	-0.262522		0.450562	1	0.0798263		0.459813	0.975381	-0.10784		0.124757	1	-0.0253337			-0.0399256	0.0388261	-0.0297204	0.202424	0.265881
5148	Q9Y3A5	SBDS	Ribosome maturation protein SBDS OS=Homo sapiens GN=SBDS PE=1 SV=4	SBDS (8)	SBDS (10)	SBDS (8;10)	Both		8	10		0.623748	0.534105	0.0949493		0.801101	0.536152	0.133912		0.980449	0.219832	0.272306		0.730223	0.183051	0.413953		0.189217	1	0.0434901		0.403791	1	-0.084195		0.298906	0.979118	-0.13156		0.224784	1	-0.100422			-0.0388727	0.0378291	0.0481665	0.180689	0.334886
6056	Q86T03	TMEM55B	Type 1 phosphatidylinositol 4,5-bisphosphate 4-phosphatase OS=Homo sapiens GN=TMEM55B PE=1 SV=1	TMEM55B (5)	TMEM55B (4)	TMEM55B (5;4)	Both		5	4		0.225232	0.674491	-0.0699414		0.343142	0.649547	0.0931664		0.915791	0.353466	0.171174		3.47376	0.121995	0.41379		0.172266	1	0.0663761		0.889512	1	0.129525		1.12898	1	-0.225252		0.218317	1	-0.0422102			-0.0274216	0.0268933	0.0249141	0.0118648	0.131843
1093	Q9Y696	CLIC4	Chloride intracellular channel protein 4 OS=Homo sapiens GN=CLIC4 PE=1 SV=4	CLIC4 (19)	CLIC4 (17)	CLIC4 (19;17)	Both	Plasma membrane	19	17		0.0945561	0.936239	-0.0131307		0.863424	0.806079	0.0406033		1.87884	0.154158	0.323428		1.05171	0.167313	0.413698		0.0495338	1	-0.00941484		0.168778	1	-0.0173673		0.0314603	0.99567	0.00957943		0.197163	1	-0.0959462			-0.0435935	0.0422884	-0.0536002	0.0436204	0.35328
2211	Q9H3K2	GHITM	Growth hormone-inducible transmembrane protein OS=Homo sapiens GN=GHITM PE=1 SV=2	GHITM (3)	GHITM (3)	GHITM (3;3)	Both	Mitochondrion-Mtx	3	3		1.45769	0.24452	-0.254202		0.364477	0.593053	0.106233		0.0923898	0.896973	-0.0196859		1.60364	0.135663	0.412972		0.223677	1	0.115583		0.360024	1	0.117767		0.168985	0.962983	0.0493649		0.163916	1	0.0557052			-0.113323	0.105002	-0.270156	0.0131236	-0.05249
2221	Q14161	GIT2	ARF GTPase-activating protein GIT2 OS=Homo sapiens GN=GIT2 PE=1 SV=2	GIT2 (1)	GIT2 (3)	GIT2 (1;3)	Both		1	3		0.114577	0.652905	-0.0829257		0.06877	0.814458	0.05382		0.237261	0.426328	0.162863		0.241319	0.242031	0.412915		0.144874	1	-0.164255		0.2341	1	-0.160586		0.218625	1	-0.379606		0.0178811	1	0.0535868			0.00445418	-0.00446521	-0.301962	-0.177165	-0.0498572
4352	P36954	POLR2I	DNA-directed RNA polymerase II subunit RPB9 OS=Homo sapiens GN=POLR2I PE=1 SV=1	POLR2I (1)	POLR2I (1)	POLR2I (1;1)	Both		1	1		0.169687	0.729935	0.0544688		0.125934	0.64341	0.111006		0.342979	0.324215	0.21744		1.56389	0.138819	0.412256		0.398273	1	-0.255829		0.212046	1	-0.14171		0.93517	1	-0.258128		0.244191	1	0.0645082			-0.069928	0.0666534	-0.0439509	-0.157902	0.0206368
5067	Q9HB90	RRAGC	Ras-related GTP-binding protein C OS=Homo sapiens GN=RRAGC PE=1 SV=1	RRAGC (4)	RRAGC (1)	RRAGC (4;1)	Both		4	1		0.599212	0.488905	0.120475		0.84669	0.54697	-0.133368		3.61777	0.286752	0.184915		4.58863	0.121207	0.41154		0.286613	1	0.0611919		0.918454	1	-0.187898		0.225296	0.963999	0.0469775		0.610832	1	-0.131639			-0.0069171	0.00687973	0.0681408	-0.168341	0.183553
1261	Q9H336	CRISPLD1	Cysteine-rich secretory protein LCCL domain-containing 1 OS=Homo sapiens GN=CRISPLD1 PE=2 SV=1	CRISPLD1 (4)	CRISPLD1 (2)	CRISPLD1 (4;2)	Both		4	2		0.428758	0.411005	-0.155427		1.60265	0.287331	-0.284898		1.25681	0.260806	0.212399		0.927491	0.167561	0.40855		0.0105686	1	0.00661829		0.152649	1	-0.10022		0.0047351	0.998288	0.00543007		0.279962	1	-0.189001			-0.0758842	0.0720469	-0.0476092	-0.309305	0.17708
2917	P07942	LAMB1	Laminin subunit beta-1 OS=Homo sapiens GN=LAMB1 PE=1 SV=2	LAMB1 (36)	LAMB1 (36)	LAMB1 (36;36)	Both	ER-Membrane	36	36		0.0434255	0.93736	0.0141416		0.828859	0.891963	-0.0227503		0.010322	0.964466	-0.0106254		0.9455	0.175525	0.408436		0.423237	1	0.41805		0.334639	1	0.314852		0.354179	0.96825	-0.0905168		0.754548	1	-0.357237			0.0151116	-0.0152619	0.107819	-0.0161705	-0.29855
2165	Q9H227	GBA3	Cytosolic beta-glucosidase OS=Homo sapiens GN=GBA3 PE=1 SV=2	GBA3 (3)	GBA3 (1)	GBA3 (3;1)	Both		3	1		0.368353	0.474102	0.13054		1.83361	0.279838	-0.269653		0.411831	0.460283	-0.129353		0.613271	0.195408	0.407733		0.792748	1	0.328437		0.880203	1	0.324258		0.00474508	0.998491	-0.00298583		0.609106	1	-0.395744			0.0545591	-0.0566675	0.237508	-0.233596	-0.226981
5353	Q9P2F8	SIPA1L2	Signal-induced proliferation-associated 1-like protein 2 OS=Homo sapiens GN=SIPA1L2 PE=1 SV=2	SIPA1L2 (10)	SIPA1L2 (10)	SIPA1L2 (10;10)	Both		10	10		3.00062	0.297544	-0.186027		3.32423	0.337802	-0.220695		0.486073	0.232599	0.298476		0.922606	0.176183	0.406939		0.201611	1	-0.121727		0.189709	1	-0.12151		0.245613	0.968247	-0.0736421		0.305872	1	-0.0994272			-0.0126163	0.0124987	-0.183586	-0.224633	0.467565
3984	Q9ULR5	PAIP2B	Polyadenylate-binding protein-interacting protein 2B OS=Homo sapiens GN=PAIP2B PE=1 SV=2	PAIP2B (2)	PAIP2B (1)	PAIP2B (2;1)	Both		2	1		0.691423	0.255363	-0.261453		0.510023	0.528168	0.135012		1.01341	0.308902	0.181413		0.359525	0.219697	0.406836		0.414095	1	-0.203687		0.242004	1	0.127479		0.0651049	0.960191	-0.0835492		0.00546077	1	0.00794452			-0.196097	0.172501	-0.383298	0.207438	0.196446
4036	P57723	PCBP4	Poly(rC)-binding protein 4 OS=Homo sapiens GN=PCBP4 PE=2 SV=1	PCBP4 (5)	PCBP4 (3)	PCBP4 (5;3)	Both		5	3		0.976547	0.459237	-0.115945		0.469666	0.411531	0.212581		1.11881	0.104146	0.467911		0.334507	0.222474	0.406833		0.103441	1	0.103554		0.16571	1	0.109152		0.235116	1	-0.286781		0.140941	1	-0.1801			0.118049	-0.12849	-0.133148	0.345624	0.563004
2487	Q9BX68	HINT2	Histidine triad nucleotide-binding protein 2, mitochondrial OS=Homo sapiens GN=HINT2 PE=1 SV=1	HINT2 (1)	HINT2 (3)	HINT2 (1;3)	Both	Mitochondrion-Mtx	1	3		0.167503	0.563172	-0.0987495		0.157519	0.758859	0.0544014		0.130901	0.730741	-0.054844		0.474715	0.204105	0.40672		0.0350088	1	0.0326645		0.36609	1	-0.195943		0.0259296	0.979308	0.0299462		0.0290034	1	-0.0307709			-0.315769	0.258763	-0.282742	0.0621213	-0.160257
5429	Q8IWA5	SLC44A2	Choline transporter-like protein 2 OS=Homo sapiens GN=SLC44A2 PE=1 SV=3	SLC44A2 (5)	SLC44A2 (7)	SLC44A2 (5;7)	Both	Plasma membrane	5	7		0.223395	0.843212	-0.0302916		1.29352	0.689202	0.0647715		1.30704	0.452481	0.11428		0.736788	0.189975	0.406456		0.299883	1	-0.0984064		0.713951	1	-0.202096		0.672735	1	-0.363158		0.0327069	1	-0.0185863			-0.0412485	0.0400768	0.0107825	0.0658727	0.0895193
1786	P09104	ENO2	Gamma-enolase OS=Homo sapiens GN=ENO2 PE=1 SV=3	ENO2 (52)	ENO2 (50)	ENO2 (52;50)	Both		52	50		0.030229	0.972946	0.00535417		2.21912	0.388829	0.182536		0.201208	0.577584	0.103243		0.573936	0.2004	0.40622		0.0227494	1	-0.0175616		0.0516687	1	-0.0325368		0.33096	1	-0.229679		0.137224	1	0.101359			-0.0395944	0.0385126	0.0525414	0.201192	0.259681
2481	Q6NVY1	HIBCH	3-hydroxyisobutyryl-CoA hydrolase, mitochondrial OS=Homo sapiens GN=HIBCH PE=1 SV=2	HIBCH (12)	HIBCH (13)	HIBCH (12;13)	Both		12	13		0.307104	0.863076	-0.0241671		0.156507	0.864401	-0.0321938		2.34405	0.260245	0.204306		3.39914	0.122637	0.405853		0.248969	1	-0.0749873		0.580723	1	-0.164512		0.810931	1	-0.184005		0.309838	1	-0.0619274			-0.0488902	0.0472579	-0.0133798	-0.0946713	0.222482
4790	Q9BYM8	RBCK1	RanBP-type and C3HC4-type zinc finger-containing protein 1 OS=Homo sapiens GN=RBCK1 PE=1 SV=2	RBCK1 (3)	RBCK1 (4)	RBCK1 (3;4)	Both		3	4		0.415424	0.437368	0.15138		0.00905112	0.990611	0.00314155		0.343022	0.440591	0.147218		0.806111	0.184407	0.404536		0.334875	1	-0.142676		0.617925	1	-0.269495		0.381799	0.980892	-0.133525		0.244143	1	-0.112695			-0.00681169	0.00677532	0.256838	-0.093715	0.275072
3807	P01111	NRAS	GTPase NRas OS=Homo sapiens GN=NRAS PE=1 SV=1	NRAS (3)	NRAS (5)	NRAS (3;5)	Both	Plasma membrane	3	5		1.00987	0.864566	0.0235327		3.62903	0.408152	0.169356		0.550457	0.331631	0.198573		0.542265	0.205493	0.403487		0.090717	1	0.0290619		0.155212	1	-0.0611442		0.252137	1	-0.190429		0.281725	1	0.402092			0.00814442	-0.00818556	0.0207864	0.166488	0.293591
1092	O00299	CLIC1	Chloride intracellular channel protein 1 OS=Homo sapiens GN=CLIC1 PE=1 SV=4	CLIC1 (18)	CLIC1 (17)	CLIC1 (18;17)	Both		18	17		0.455919	0.528696	-0.102379		1.23446	0.288767	0.315392		2.82094	0.188446	0.267197		0.355414	0.21945	0.403216		0.107113	1	0.111093		0.0777947	1	-0.0373195		0.221114	1	-0.241977		0.136792	1	-0.164651			0.044834	-0.0462423	-0.17076	0.367232	0.261841
2027	P02675	FGB	Fibrinogen beta chain OS=Homo sapiens GN=FGB PE=1 SV=2	FGB (13)	FGB (11)	FGB (13;11)	Both		13	11		0.321814	0.553396	0.0950683		0.0709247	0.943076	-0.0130851		0.00631861	0.986266	-0.00360783		1.17727	0.158076	0.403063		0.588579	1	0.353446		0.526389	1	0.31015		0.140538	0.96271	-0.0432708		1.01584	1	-0.365635			0.121662	-0.132786	0.183844	-0.0536222	-0.162974
4163	O00264	PGRMC1	Membrane-associated progesterone receptor component 1 OS=Homo sapiens GN=PGRMC1 PE=1 SV=3	PGRMC1 (10)	PGRMC1 (9)	PGRMC1 (10;9)	Both	ER-Membrane	10	9		0.0153328	0.975569	0.00519727		0.387987	0.72616	0.0615833		0.000942895	0.999302	-0.000101519		1.01226	0.171936	0.401692		0.3267	1	0.0269211		0.167172	1	0.0561604		0.11385	0.970296	-0.0321845		0.0930566	1	0.0617348			-0.075514	0.0717128	0.0979466	0.109876	0.0137392
2920	H0YCG2	LAMP2	Lysosome-associated membrane glycoprotein 2 (Fragment) OS=Homo sapiens GN=LAMP2 PE=1 SV=1	LAMP2 (1)	LAMP2 (1)	LAMP2 (1;1)	Both		1	1		1.17536	0.214549	-0.315717		0.0159848	0.973377	0.00670205		0.572207	0.37383	0.152662		1.42601	0.143507	0.401487		1.96344	1	0.0377094		2.09294	1	-0.146895		0.256038	0.963513	-0.0615301		1.05137	1	-0.260826			-0.238907	0.204787	-0.317843	-0.0873635	0.136855
2459	Q9NRV9	HEBP1	Heme-binding protein 1 OS=Homo sapiens GN=HEBP1 PE=1 SV=1	HEBP1 (2)	HEBP1 (2)	HEBP1 (2;2)	Both		2	2		0.0460791	0.922669	-0.0177316		0.113665	0.653436	0.109683		1.10302	0.285228	0.207054		0.672031	0.194815	0.401211		0.364027	1	-0.141595		0.506564	1	-0.173336		0.707089	1	-0.395395		0.093806	1	-0.0605331			-0.0375126	0.036539	-0.128903	-0.180735	0.25202
6381	Q9Y3C8	UFC1	Ubiquitin-fold modifier-conjugating enzyme 1 OS=Homo sapiens GN=UFC1 PE=1 SV=3	UFC1 (1)	UFC1 (4)	UFC1 (1;4)	Both		1	4		0.444731	0.478511	-0.113934		1.39738	0.28575	0.286837		0.282569	0.527981	0.103439		0.565963	0.200832	0.399989		0.471154	1	-0.180259		0.454978	1	-0.178822		0.388558	1	-0.277309		0.202987	1	-0.136162			-0.19872	0.174528	-0.192208	0.228221	-0.0131382
457	P00966	ASS1	Argininosuccinate synthase OS=Homo sapiens GN=ASS1 PE=1 SV=2	ASS1 (9)	ASS1 (11)	ASS1 (9;11)	Both		9	11		0.678684	0.638254	0.0661658		0.411953	0.871608	-0.0273708		1.7917	0.106529	0.421797		0.488438	0.209828	0.398902		0.387531	1	-0.0653326		0.78768	1	-0.140009		0.111182	0.967432	-0.0837366		0.153864	1	0.167645			-0.0551911	0.0531241	0.0953536	-0.0284944	0.378999
2264	Q9BYB4	GNB1L	Guanine nucleotide-binding protein subunit beta-like protein 1 OS=Homo sapiens GN=GNB1L PE=1 SV=2	GNB1L (2)	GNB1L (1)	GNB1L (2;1)	Both		2	1		0.166367	0.463308	-0.159934		0.520636	0.253042	0.437937		0.679449	0.102803	0.544075		0.247461	0.245311	0.398803		0.135912	1	0.138607		0.0808164	1	0.0678095		0.168268	1	-0.308331		0.103913	1	-0.192507			0.140612	-0.155707	-0.460894	0.676302	0.314257
4665	P09417	QDPR	Dihydropteridine reductase OS=Homo sapiens GN=QDPR PE=1 SV=2	QDPR (17)	QDPR (11)	QDPR (17;11)	Both		17	11		0.339453	0.369983	0.195819		0.188789	0.605233	0.123373		0.44181	0.182051	0.395856		0.443098	0.214471	0.398588		0.155835	1	-0.14225		0.290687	1	-0.242863		0.307367	1	-0.260049		0.0881095	1	-0.0925261			0.0134769	-0.0135953	0.0197141	-0.0782465	0.137681
5594	Q8N0X7	SPG20	Spartin OS=Homo sapiens GN=SPG20 PE=1 SV=1	SPG20 (2)	SPG20 (4)	SPG20 (2;4)	Both		2	4		0.605494	0.394924	0.164394		0.638546	0.48651	-0.16232		0.877701	0.273121	0.224245		0.433237	0.215364	0.396521		0.314501	1	-0.0688851		0.364547	1	-0.0819944		0.237448	1	-0.203721		0.0670917	1	-0.0947985			0.0541056	-0.0561781	0.0854778	-0.23613	0.156973
2269	P50150	GNG4	Guanine nucleotide-binding protein G(I)/G(S)/G(O) subunit gamma-4 OS=Homo sapiens GN=GNG4 PE=1 SV=1	GNG4 (2)	GNG4 (1)	GNG4 (2;1)	Both		2	1		0.105182	0.604323	0.103645		0.190072	0.60524	0.119882		0.133216	0.666119	-0.0784609		0.411567	0.216384	0.396174		0.188956	1	-0.108879		0.133476	1	-0.118711		0.511835	1	-0.498981		0.274984	1	-0.254792			-0.0241404	0.0237283	-0.195249	-0.0780249	-0.259603
1658	O00559	EBAG9	Receptor-binding cancer antigen expressed on SiSo cells OS=Homo sapiens GN=EBAG9 PE=1 SV=1	EBAG9 (3)	EBAG9 (3)	EBAG9 (3;3)	Both		3	3		1.16522	0.566933	0.0795119		0.729773	0.757042	-0.0499806		0.920641	0.139678	0.395277		3.07645	0.131755	0.39358		0.0654166	1	-0.0366052		0.0143595	1	0.00701591		0.838757	0.99048	0.130887		0.453418	1	0.107759			-0.0709654	0.0675959	0.0655816	-0.0401797	0.302083
1895	Q01469	FABP5	Fatty acid-binding protein, epidermal OS=Homo sapiens GN=FABP5 PE=1 SV=3	FABP5 (5)	FABP5 (6)	FABP5 (5;6)	Both		5	6		0.660344	0.419468	-0.14504		1.83829	0.483826	-0.143589		0.282548	0.366695	0.195081		0.410047	0.219064	0.392787		0.0225293	1	-0.0225481		0.122461	1	0.112198		0.219537	1	-0.19907		0.195041	1	0.272004			0.0676359	-0.0709174	-0.083007	-0.14174	-0.0156556
3621	Q14686	NCOA6	Nuclear receptor coactivator 6 OS=Homo sapiens GN=NCOA6 PE=1 SV=3	NCOA6 (5)	NCOA6 (2)	NCOA6 (5;2)	Both	Nuclear (100% filter)	5	2		0.133131	0.707236	0.0636768		0.252055	0.632915	-0.100526		0.921252	0.23405	-0.251673		0.217837	0.261637	0.392456		0.234056	1	0.182622		0.276382	1	0.265973		0.1655	1	-0.29914		0.00734261	1	0.0191744			-0.109449	0.101666	-0.0824475	-0.225916	-0.329794
790	P27797	CALR	Calreticulin OS=Homo sapiens GN=CALR PE=1 SV=1	CALR (62)	CALR (51)	CALR (62;51)	Both	ER-Lumen	62	51		1.13472	0.455477	0.120774		0.819313	0.814734	0.0388062		3.76995	0.138704	0.318966		2.19522	0.141085	0.391663		1.49154	1	-0.0690874		0.471672	1	0.0479514		0.754923	0.963473	-0.0775512		0.0313375	1	0.00801706			0.0344477	-0.035268	0.149327	0.043854	0.309177
5262	Q14141	SEPT6	Septin-6 OS=Homo sapiens GN=SEPT6 PE=1 SV=4	SEPT6 (20)	SEPT6 (12)	SEPT6 (20;12)	Both		20	12		0.422677	0.817179	-0.0342362		0.170365	0.916639	-0.0208279		0.114818	0.717192	0.069128		0.71913	0.20063	0.388933		0.131525	1	-0.0787356		0.273677	1	-0.163227		0.719228	1	-0.393958		0.162113	1	0.0730429			0.0219512	-0.0222764	-0.00918519	0.0161557	0.24986
1689	P52799	EFNB2	Ephrin-B2 OS=Homo sapiens GN=EFNB2 PE=1 SV=1	EFNB2 (3)	EFNB2 (2)	EFNB2 (3;2)	Both		3	2		0.783015	0.305497	-0.211698		0.543875	0.219394	0.531341		0.829225	0.274667	0.225085		0.739442	0.195321	0.388454		0.0135231	1	0.0160637		0.0969631	1	-0.10869		0.89257	1	-0.628199		0.632919	1	-0.273338			0.0323475	-0.0330683	-0.285589	0.79055	0.295647
2536	O14979	HNRNPDL	Heterogeneous nuclear ribonucleoprotein D-like OS=Homo sapiens GN=HNRNPDL PE=1 SV=3	HNRNPDL (27)	HNRNPDL (25)	HNRNPDL (27;25)	Both		27	25		2.10978	0.212076	-0.295964		0.964838	0.28794	0.320898		1.05092	0.240524	0.244098		0.588899	0.207497	0.387655		0.0998202	1	0.0916466		0.578232	1	-0.149572		0.461414	1	-0.277067		0.245251	1	-0.146498			-0.0347288	0.0338913	-0.32965	0.397112	0.301579
3616	P19338	NCL	Nucleolin OS=Homo sapiens GN=NCL PE=1 SV=3	NCL (35)	NCL (28)	NCL (35;28)	Both		35	28		0.347913	0.734178	0.0540309		1.01466	0.507668	-0.146175		1.13512	0.210848	0.282238		0.819806	0.194838	0.386759		0.774085	1	-0.14375		0.932736	1	-0.196329		0.704112	1	-0.295288		0.0514756	1	-0.0172139			-0.0242159	0.023801	0.100956	-0.177367	0.240386
5571	Q9Y651	SOX21	Transcription factor SOX-21 OS=Homo sapiens GN=SOX21 PE=2 SV=1	SOX21 (2)	SOX21 (2)	SOX21 (2;2)	Both		2	2		1.75121	0.312283	-0.182333		1.0656	0.336621	-0.240925		0.546684	0.187372	0.358019		0.814833	0.19086	0.386536		0.529582	1	-0.316807		0.0575734	1	-0.0371003		0.838913	1	-0.392875		0.0447245	1	0.0294591			0.0224621	-0.0228031	-0.172916	-0.18102	0.176404
4702	Q96DA2	RAB39B	Ras-related protein Rab-39B OS=Homo sapiens GN=RAB39B PE=1 SV=1	RAB39B (8)	RAB39B (9)	RAB39B (8;9)	Both		8	9		2.52673	0.538362	-0.0839913		0.255583	0.842666	-0.0381662		2.15732	0.41807	0.123657		2.9485	0.140745	0.385415		0.245573	1	-0.0554912		0.0895885	1	0.0168899		0.153009	0.983051	0.0203788		0.452144	1	-0.0440073			-0.01829	0.0180495	-0.0880708	-0.0842017	0.111243
4614	A2A3K4	PTPDC1	Protein tyrosine phosphatase domain-containing protein 1 OS=Homo sapiens GN=PTPDC1 PE=1 SV=1	PTPDC1 (6)	PTPDC1 (4)	PTPDC1 (6;4)	Both		6	4		0.408319	0.514011	-0.10707		0.490444	0.715063	-0.0598201		1.59666	0.30422	0.178463		0.923685	0.182382	0.385363		0.68004	1	-0.140004		0.0967401	1	-0.0258511		0.11162	0.967238	-0.038365		0.07362	1	-0.0433738			-0.0921225	0.0865381	-0.0274861	-0.035014	0.192362
5462	Q92922	SMARCC1	SWI/SNF complex subunit SMARCC1 OS=Homo sapiens GN=SMARCC1 PE=1 SV=3	SMARCC1 (19)	SMARCC1 (21)	SMARCC1 (19;21)	Both		19	21		0.522679	0.680276	-0.0598025		0.519189	0.848979	0.0311345		3.17788	0.157059	0.298148		0.499901	0.214615	0.385349		0.111914	1	0.0273941		0.419621	1	-0.110007		0.413129	1	-0.303915		0.066439	1	0.116242			-0.04903	0.0473889	-0.0958473	0.0161307	0.28055
730	P02746	C1QB	Complement C1q subcomponent subunit B OS=Homo sapiens GN=C1QB PE=1 SV=3	C1QB (1)	C1QB (3)	C1QB (1;3)	Both		1	3		0.0377735	0.879241	0.0300406		0.198119	0.783463	0.0527518		0.289803	0.833576	0.0321687		0.436637	0.218622	0.384978		1.7666	1	0.366273		0.495118	1	0.236349		0.0743568	0.960248	0.0640405		0.245819	1	-0.203012			0.0674353	-0.0706968	0.256935	0.133386	4.3167e-05
4754	Q2PPJ7	RALGAPA2	Ral GTPase-activating protein subunit alpha-2 OS=Homo sapiens GN=RALGAPA2 PE=1 SV=2	RALGAPA2 (3)	RALGAPA2 (1)	RALGAPA2 (3;1)	Both		3	1		0.166615	0.588852	0.0998052		0.495866	0.285826	0.371448		0.54052	0.12012	0.510566		0.282711	0.241362	0.383814		0.00874315	1	-0.00866127		0.209961	1	-0.171899		0.262234	1	-0.3541		0.0122686	1	-0.0209835			-0.0298092	0.0291873	-0.0831212	0.165807	0.260418
4746	P78406	RAE1	mRNA export factor OS=Homo sapiens GN=RAE1 PE=1 SV=1	RAE1 (10)	RAE1 (12)	RAE1 (10;12)	Both		10	12		0.344383	0.804233	0.0373598		0.0859725	0.842098	0.0427336		0.199731	0.86975	0.0271804		0.334678	0.229488	0.383412		0.31807	1	0.0441108		0.148438	1	-0.0224638		0.151887	1	-0.172087		0.0220169	1	-0.0352939			0.0266661	-0.027151	0.0707782	-0.10486	-0.0146802
4088	Q9HBH1	PDF	Peptide deformylase, mitochondrial OS=Homo sapiens GN=PDF PE=1 SV=1	PDF (1)	PDF (1)	PDF (1;1)	Both	Mitochondrion-IM	1	1		0.576669	0.35695	-0.171478		0.0535704	0.814757	0.0548148		0.0750313	0.787266	-0.0482061		0.69957	0.190425	0.383182		0.164232	1	0.13554		0.408572	1	-0.23405		0.615898	1	0.356341		0.134924	1	-0.0755219			-0.172698	0.154125	-0.228852	-0.250748	-0.237622
822	Q9Y2V2	CARHSP1	Calcium-regulated heat-stable protein 1 OS=Homo sapiens GN=CARHSP1 PE=1 SV=2	CARHSP1 (3)	CARHSP1 (4)	CARHSP1 (3;4)	Both		3	4		0.45159	0.782467	0.0389232		0.0516307	0.934003	0.0181293		1.30825	0.283608	0.198377		2.95727	0.137567	0.382691		0.147625	1	0.0346595		0.679116	1	-0.124216		0.793539	0.993919	-0.124019		0.64239	1	-0.0554407			-0.0662353	0.0632881	0.0343369	-0.0834227	0.15496
3545	Q86UW6	N4BP2	NEDD4-binding protein 2 OS=Homo sapiens GN=N4BP2 PE=1 SV=2	N4BP2 (18)	N4BP2 (12)	N4BP2 (18;12)	Both		18	12		1.97857	0.172582	-0.420161		1.16206	0.619435	0.0881334		1.95505	0.206637	0.261552		2.02509	0.157845	0.380135		2.00494	1	-0.320085		0.237138	1	-0.0204139		1.09753	1	-0.440764		0.536594	1	-0.0508176			-0.0267989	0.0262936	-0.447599	0.108786	0.283994
6091	O14787	TNPO2	Transportin-2 OS=Homo sapiens GN=TNPO2 PE=1 SV=3	TNPO2 (8)	TNPO2 (6)	TNPO2 (8;6)	Both		8	6		2.0958	0.23402	0.268543		0.363486	0.670748	0.077032		0.176242	0.715821	-0.0624023		0.203098	0.280346	0.380121		0.496396	1	0.332405		0.458171	1	0.167468		0.00655119	0.995237	-0.0137003		0.127374	1	0.367465			0.00670856	-0.00673566	0.270733	0.00942185	-0.172096
4964	P35244	RPA3	Replication protein A 14 kDa subunit OS=Homo sapiens GN=RPA3 PE=1 SV=1	RPA3 (5)	RPA3 (4)	RPA3 (5;4)	Both		5	4		0.328168	0.614587	-0.0731247		0.707293	0.546575	0.121513		0.921167	0.350299	0.157503		1.95326	0.145898	0.379854		0.947174	1	0.0584176		0.571703	1	-0.100887		0.0450696	0.994888	-0.00674328		0.220363	1	-0.0385588			-0.141096	0.12844	-0.13277	0.100704	0.141412
820	B1AK88	CAPZB	Capping protein (Actin filament) muscle Z-line, beta, isoform CRA_d OS=Homo sapiens GN=CAPZB PE=1 SV=1	CAPZB (16)	CAPZB (15)	CAPZB (16;15)	Both		16	15		0.616577	0.413551	0.143833		0.0404196	0.943756	-0.0145327		1.25984	0.290011	0.190341		0.319005	0.233986	0.379408		0.0159263	0.999598	0.00241919		0.583644	1	-0.137978		0.260812	1	-0.304226		0.0935307	1	0.170543			0.133715	-0.147288	0.212581	-0.115238	0.2255
1844	Q96HE7	ERO1A	ERO1-like protein alpha OS=Homo sapiens GN=ERO1A PE=1 SV=2	ERO1A (12)	ERO1A (15)	ERO1A (12;15)	Both	ER-Lumen	12	15		0.975375	0.551867	0.0895382		0.301961	0.754396	0.0605317		0.445575	0.390307	0.167738		0.765274	0.20127	0.379322		0.0385391	1	-0.0190429		0.0630766	1	-0.0296958		0.422418	1	-0.15564		0.033191	1	0.016945			-0.0261252	0.0256443	0.0657036	-0.000695063	0.0606422
1406	Q8IWE4	DCUN1D3	DCN1-like protein 3 OS=Homo sapiens GN=DCUN1D3 PE=1 SV=1	DCUN1D3 (4)	DCUN1D3 (2)	DCUN1D3 (4;2)	Both		4	2		0.387526	0.245541	-0.358421		0.568866	0.205647	0.601684		1.23772	0.311216	0.182537		0.380642	0.226905	0.378844		0.133032	1	0.178343		0.121927	1	-0.0853135		0.435293	1	-0.416966		0.144094	1	-0.162469			0.0170864	-0.0172802	-0.629472	0.875496	0.220449
6498	Q8N0U8	VKORC1L1	Vitamin K epoxide reductase complex subunit 1-like protein 1 OS=Homo sapiens GN=VKORC1L1 PE=1 SV=2	VKORC1L1 (2)	VKORC1L1 (2)	VKORC1L1 (2;2)	Both	ER-Membrane	2	2		0.331854	0.397408	0.183997		1.20019	0.290442	0.294067		0.63812	0.208443	0.315848		0.365292	0.22787	0.377733		0.215659	1	0.0845433		0.0713815	1	-0.0291326		0.241791	1	-0.243208		0.0339378	1	-0.0424024			0.00423573	-0.00424553	0.0186311	0.32834	0.195772
227	Q9H553	ALG2	Alpha-1,3/1,6-mannosyltransferase ALG2 OS=Homo sapiens GN=ALG2 PE=1 SV=1	ALG2 (5)	ALG2 (4)	ALG2 (5;4)	Both	ER-Membrane	5	4		0.902712	0.354753	-0.164662		0.00819304	0.991931	-0.00238603		0.103093	0.885039	0.0226877		1.90697	0.152191	0.375986		0.328791	1	0.0884587		0.393406	1	-0.0594828		0.755382	0.978511	0.119342		0.326202	1	-0.09087			-0.186886	0.165331	-0.138443	0.0473195	0.0133337
3979	Q99487	PAFAH2	Platelet-activating factor acetylhydrolase 2, cytoplasmic OS=Homo sapiens GN=PAFAH2 PE=1 SV=1	PAFAH2 (3)	PAFAH2 (3)	PAFAH2 (3;3)	Both		3	3		1.27286	0.244392	0.27753		0.623444	0.5791	0.122797		3.14633	0.273486	0.194736		1.34914	0.181243	0.375265		0.181996	1	0.0671438		0.50366	1	0.148945		0.531237	0.977736	0.108505		0.0966993	1	0.0211064			-0.020367	0.020071	0.245747	0.17303	0.204122
5658	Q13247	SRSF6	Serine/arginine-rich splicing factor 6 OS=Homo sapiens GN=SRSF6 PE=1 SV=2	SRSF6 (2)	SRSF6 (5)	SRSF6 (2;5)	Both		2	5		0.581999	0.246551	-0.307676		0.0385677	0.930435	-0.0183395		0.199817	0.680149	0.0645323		0.414575	0.219699	0.375258		0.188353	1	-0.054072		0.53357	1	-0.165982		0.24694	1	-0.250707		0.0898922	1	-0.109129			-0.02057	0.0202682	-0.1549	-0.151881	0.144899
4093	P30101	PDIA3	Protein disulfide-isomerase A3 OS=Homo sapiens GN=PDIA3 PE=1 SV=4	PDIA3 (61)	PDIA3 (43)	PDIA3 (61;43)	Both	ER-Lumen	61	43		0.61599	0.566865	0.0873789		0.0137905	0.989481	0.00350126		1.23867	0.185679	0.304927		1.62364	0.167959	0.374378		0.172764	1	-0.0436247		0.173242	1	0.0510673		0.121544	0.981153	-0.0213081		0.254424	1	0.078053			0.0604139	-0.0630142	0.0434914	-0.0671086	0.253302
2918	P11047	LAMC1	Laminin subunit gamma-1 OS=Homo sapiens GN=LAMC1 PE=1 SV=3	LAMC1 (59)	LAMC1 (54)	LAMC1 (59;54)	Both	ER-Membrane	59	54		0.240766	0.615659	0.0855752		0.437194	0.685666	-0.0742111		0.0325567	0.887646	-0.0297538		1.0804	0.18734	0.374085		0.379117	1	0.328069		0.318	1	0.271539		0.570618	1	-0.144864		0.87103	1	-0.363796			0.0587539	-0.0612092	0.19412	-0.127147	-0.29126
5427	Q8WWI5	SLC44A1	Choline transporter-like protein 1 OS=Homo sapiens GN=SLC44A1 PE=1 SV=1	SLC44A1 (3)	SLC44A1 (2)	SLC44A1 (3;2)	Both		3	2		0.51704	0.25863	-0.289736		0.21981	0.539417	0.16873		0.118755	0.893766	0.02319		0.800283	0.203099	0.373668		0.212098	1	0.153374		0.129486	1	-0.0620915		0.836582	1	-0.368625		0.707126	1	-0.270165			-0.00794862	0.00790002	-0.139548	0.403114	0.0818811
2375	G3V4T6	GSTZ1	Maleylacetoacetate isomerase OS=Homo sapiens GN=GSTZ1 PE=1 SV=1	GSTZ1 (4)	GSTZ1 (8)	GSTZ1 (4;8)	Both		4	8		0.533365	0.871163	-0.0243711		1.14869	0.756383	-0.0524982		0.543728	0.413106	0.151577		0.529457	0.216165	0.372747		0.119701	1	-0.0358518		0.431751	1	-0.104527		0.492861	1	-0.317472		0.130908	1	0.130794			0.0181061	-0.0183246	-0.0103568	-0.0405879	0.225437
3305	Q9NQG6	MIEF1	Mitochondrial dynamics protein MID51 OS=Homo sapiens GN=MIEF1 PE=1 SV=1	MIEF1 (1)	MIEF1 (3)	MIEF1 (1;3)	Both		1	3		0.200224	0.59028	-0.0881998		0.490565	0.592744	0.101485		1.18646	0.102348	-0.462256		1.70973	0.157094	0.372595		1.07922	1	0.470048		0.450928	1	0.36537		0.217895	1	-0.251449		0.742112	1	-0.166488			-0.110381	0.10247	0.0349428	0.0734131	-0.578796
5587	Q15005	SPCS2	Signal peptidase complex subunit 2 OS=Homo sapiens GN=SPCS2 PE=1 SV=3	SPCS2 (12)	SPCS2 (12)	SPCS2 (12;12)	Both	ER-Membrane	12	12		1.06283	0.688727	0.0532188		0.122269	0.959461	-0.00822793		0.734981	0.259979	0.249147		0.960801	0.194899	0.372522		0.0525506	1	-0.0149127		0.426706	1	-0.123144		0.472606	0.98534	-0.125274		0.228123	1	0.0655928			-0.0435384	0.0422365	0.0579063	-0.0206694	0.330914
2334	P36969	GPX4	Phospholipid hydroperoxide glutathione peroxidase, mitochondrial OS=Homo sapiens GN=GPX4 PE=1 SV=3	GPX4 (8)	GPX4 (8)	GPX4 (8;8)	Both		8	8		0.183174	0.633973	-0.0824794		2.90045	0.232763	0.33898		0.57444	0.200638	0.331289		0.406097	0.226547	0.371891		0.0953538	1	0.0632262		0.364878	1	-0.185813		0.32298	1	-0.28669		0.120831	1	-0.111431			-0.0801583	0.0758912	-0.221297	0.330224	0.175963
6161	A5PLN9	TRAPPC13	Trafficking protein particle complex subunit 13 OS=Homo sapiens GN=TRAPPC13 PE=1 SV=2	TRAPPC13 (1)	TRAPPC13 (1)	TRAPPC13 (1;1)	Both		1	1		0.230507	0.487951	-0.135047		0.411618	0.273292	-0.42998		0.0081931	0.990942	-0.0020644		1.02478	0.184953	0.371673		0.0575653	1	-0.0132672		0.523015	1	-0.140797		0.999682	1	-0.408812		0.641141	1	-0.209619			0.00282669	-0.00283051	-0.317459	-0.128393	-0.0682018
279	Q4KMQ2	ANO6	Anoctamin-6 OS=Homo sapiens GN=ANO6 PE=1 SV=2	ANO6 (4)	ANO6 (3)	ANO6 (4;3)	Both	Plasma membrane	4	3		0.368218	0.650889	-0.0735542		0.336784	0.669123	0.0864931		2.11587	0.27448	0.207451		0.715536	0.208608	0.371331		0.266311	1	-0.0602196		1.37033	1	-0.100627		0.49008	1	-0.236961		0.326173	1	-0.123252			-0.0130762	0.0129505	-0.0147002	0.00991402	0.217913
4149	P18669	PGAM1	Phosphoglycerate mutase 1 OS=Homo sapiens GN=PGAM1 PE=1 SV=2	PGAM1 (48)	PGAM1 (39)	PGAM1 (48;39)	Both		48	39		0.210826	0.700394	-0.0552273		0.753556	0.437301	0.170446		0.133322	0.773348	0.0453111		1.56205	0.163416	0.370955		0.262856	1	0.0665232		0.134271	1	-0.0346578		0.323238	0.96799	-0.0862712		0.270864	1	0.0438021			-0.190054	0.167806	-0.0395071	0.15454	0.113564
3182	O95983	MBD3	Methyl-CpG-binding domain protein 3 OS=Homo sapiens GN=MBD3 PE=1 SV=1	MBD3 (1)	MBD3 (7)	MBD3 (1;7)	Both		1	7		1.2458	0.247829	-0.250235		0.0732392	0.885575	-0.0289891		0.225904	0.421921	-0.166312		0.389652	0.228106	0.370155		0.042645	1	-0.0377502		0.0612813	1	0.0505901		0.368469	1	-0.354889		0.038274	1	0.084396			-0.142895	0.12993	-0.312773	-0.144143	-0.396832
5972	Q9Y5J7	TIMM9	Mitochondrial import inner membrane translocase subunit Tim9 OS=Homo sapiens GN=TIMM9 PE=1 SV=1	TIMM9 (3)	TIMM9 (2)	TIMM9 (3;2)	Both	Mitochondrion-Mtx	3	2		0.140188	0.798843	-0.0421299		0.17962	0.761885	0.0593813		0.231224	0.810872	0.0381824		1.0117	0.19104	0.370116		0.699318	1	-0.121975		0.596564	1	-0.105325		0.500952	0.999564	-0.136984		0.50093	1	-0.13979			-0.0674489	0.0643959	0.0473739	-0.0426312	0.0868588
5025	Q9NQG5	RPRD1B	Regulation of nuclear pre-mRNA domain-containing protein 1B OS=Homo sapiens GN=RPRD1B PE=1 SV=1	RPRD1B (4)	RPRD1B (2)	RPRD1B (4;2)	Both		4	2		1.00104	0.242185	-0.277151		0.131553	0.799584	0.0456329		0.581373	0.355513	-0.162188		1.31899	0.168453	0.368362		0.116866	1	0.0529349		0.845696	1	-0.0987661		0.0778424	0.99466	0.0138007		0.42825	1	-0.100297			-0.210347	0.183435	-0.297888	0.0790676	-0.181377
5741	Q12846	STX4	Syntaxin-4 OS=Homo sapiens GN=STX4 PE=1 SV=2	STX4 (5)	STX4 (2)	STX4 (5;2)	Both	Plasma membrane	5	2		0.102947	0.910988	-0.0181392		0.881507	0.455741	0.165795		1.82867	0.213757	0.248771		1.00526	0.192643	0.367959		0.846517	1	-0.143246		0.272947	1	0.0907175		0.739786	1	-0.213119		0.315927	1	0.0820942			0.0212194	-0.0215227	-0.06949	0.113067	0.215259
5452	O00193	SMAP	Small acidic protein OS=Homo sapiens GN=SMAP PE=1 SV=1	SMAP (8)	SMAP (3)	SMAP (8;3)	Both		8	3		0.234964	0.835573	0.0290547		1.076	0.398835	-0.190205		0.36817	0.213932	0.352384		0.520358	0.21707	0.367827		0.211172	1	-0.195089		0.306302	1	-0.28884		0.429992	1	-0.287174		0.197914	1	0.136119			-0.0605859	0.0581077	-0.000977364	-0.242641	0.634284
1593	Q92782	DPF1	Zinc finger protein neuro-d4 OS=Homo sapiens GN=DPF1 PE=1 SV=2	DPF1 (2)	DPF1 (1)	DPF1 (2;1)	Both	Nuclear (100% filter)	2	1		0.219954	0.463058	0.152723		0.156828	0.585097	0.143089		0.00323798	0.9894	0.00346342		0.191174	0.296405	0.366439		0.0374897	1	-0.0437915		0.0385931	1	0.0723493		0.0414051	0.961859	-0.0950547		0.0267548	1	-0.0630209			-0.05867	0.056342	-0.0610136	-0.13557	-0.294058
4292	O75051	PLXNA2	Plexin-A2 OS=Homo sapiens GN=PLXNA2 PE=1 SV=4	PLXNA2 (15)	PLXNA2 (14)	PLXNA2 (15;14)	Both	Plasma membrane	15	14		0.727068	0.692316	0.0559104		0.0145501	0.992342	-0.00244246		0.918782	0.288214	0.216267		0.993929	0.198236	0.366149		0.130922	1	-0.0369571		0.125171	1	0.058206		0.0784298	0.993078	-0.0176597		0.102029	1	-0.0265912			-0.0324923	0.0317566	0.032563	0.0438582	0.166403
507	P56385	ATP5I	ATP synthase subunit e, mitochondrial OS=Homo sapiens GN=ATP5I PE=1 SV=2	ATP5I (4)	ATP5I (4)	ATP5I (4;4)	Both	Mitochondrion-IM	4	4		0.374161	0.462136	0.139852		0.270096	0.721369	0.0693276		0.465409	0.87234	0.0234324		0.402651	0.228276	0.364947		0.14491	1	0.0281205		0.0292552	1	-0.0143391		0.194241	1	-0.166572		0.0606174	1	0.094374			-0.0384733	0.0374503	0.0287333	-0.00971907	0.0351468
907	P50991	CCT4	T-complex protein 1 subunit delta OS=Homo sapiens GN=CCT4 PE=1 SV=4	CCT4 (43)	CCT4 (48)	CCT4 (43;48)	Both		43	48		0.167807	0.853353	-0.0307605		0.524772	0.562045	0.131134		0.962286	0.374871	0.160723		0.497117	0.21966	0.364472		0.379238	1	0.100033		0.601731	1	-0.0690844		0.283708	1	-0.186487		0.0704752	1	-0.06636			0.0104057	-0.0104748	-0.0866897	0.198354	0.128962
6141	Q9BW30	TPPP3	Tubulin polymerization-promoting protein family member 3 OS=Homo sapiens GN=TPPP3 PE=1 SV=1	TPPP3 (2)	TPPP3 (3)	TPPP3 (2;3)	Both		2	3		0.44846	0.764815	-0.0466121		0.792499	0.304851	0.303917		0.656218	0.320625	0.2028		0.357413	0.233864	0.36434		0.242977	1	-0.0654641		0.875411	1	-0.257331		0.326133	1	-0.322994		0.131474	1	-0.163368			-0.0221698	0.0218206	-0.0776204	0.222865	0.127641
4843	P35241	RDX	Radixin OS=Homo sapiens GN=RDX PE=1 SV=1	RDX (24)	RDX (16)	RDX (24;16)	Both		24	16		0.461749	0.688323	0.0574525		0.380437	0.679704	-0.0776903		2.54966	0.276085	0.191168		0.645196	0.211456	0.364104		0.095131	1	0.0133278		0.0790402	1	-0.0116517		0.454306	1	-0.223627		0.158832	1	0.164083			-0.0179515	0.0177197	0.0179148	-0.0155035	0.176555
2638	Q13907	IDI1	Isopentenyl-diphosphate Delta-isomerase 1 OS=Homo sapiens GN=IDI1 PE=1 SV=2	IDI1 (4)	IDI1 (9)	IDI1 (4;9)	Both		4	9		1.14693	0.227245	0.306548		0.984324	0.24438	0.383115		0.792178	0.260042	0.242248		0.750454	0.208808	0.361882		0.541604	1	-0.15922		0.0189354	1	0.0053149		0.720376	1	-0.294399		0.337631	1	0.23751			-0.0259386	0.0254644	0.366343	0.466438	0.162402
1690	Q15768	EFNB3	Ephrin-B3 OS=Homo sapiens GN=EFNB3 PE=1 SV=1	EFNB3 (3)	EFNB3 (3)	EFNB3 (3;3)	Both		3	3		0.0825392	0.92512	0.0143779		1.07175	0.273152	0.339575		1.40037	0.27346	0.202817		0.649298	0.210848	0.361869		0.110048	1	-0.0317449		0.742144	1	-0.0787871		0.208939	1	0.579643		0.266891	1	0.832373			0.105927	-0.11425	0.00557692	0.248094	0.214521
3678	P56181	NDUFV3	NADH dehydrogenase [ubiquinone] flavoprotein 3, mitochondrial OS=Homo sapiens GN=NDUFV3 PE=1 SV=2	NDUFV3 (2)	NDUFV3 (2)	NDUFV3 (2;2)	Both	Mitochondrion-Mtx	2	2		0.813354	0.667419	0.0575913		0.552337	0.445415	0.186297		1.54856	0.347389	0.154332		0.655015	0.21211	0.361355		0.136309	1	0.0643205		0.0248714	1	0.0144989		0.424898	1	-0.206256		0.318488	1	-0.153031			0.0629567	-0.0657872	0.0746204	0.280093	0.180931
2333	P07203	GPX1	Glutathione peroxidase 1 OS=Homo sapiens GN=GPX1 PE=1 SV=4	GPX1 (8)	GPX1 (5)	GPX1 (8;5)	Both		8	5		0.305049	0.772307	0.0429322		0.529444	0.605771	0.102709		0.324886	0.42582	0.154448		0.545669	0.219212	0.359827		0.328731	1	0.204952		0.0546033	1	0.030741		0.0298183	0.991198	-0.0185316		0.191993	1	-0.11439			0.00690866	-0.00693758	-0.000893641	0.160803	0.297596
587	Q9UHQ4	BCAP29	B-cell receptor-associated protein 29 OS=Homo sapiens GN=BCAP29 PE=1 SV=2	BCAP29 (4)	BCAP29 (3)	BCAP29 (4;3)	Both	ER-Membrane	4	3		0.14592	0.899846	0.0187039		0.0685508	0.935642	-0.0161834		1.70417	0.350792	0.14973		0.726182	0.211144	0.359389		0.107901	1	-0.0548821		0.671503	1	-0.120455		0.288452	0.978595	-0.12084		0.0305065	1	-0.0210796			0.00782716	-0.00786484	-0.0141231	-0.0840059	0.128829
4582	O00233	PSMD9	26S proteasome non-ATPase regulatory subunit 9 OS=Homo sapiens GN=PSMD9 PE=1 SV=3	PSMD9 (4)	PSMD9 (8)	PSMD9 (4;8)	Both		4	8		0.298993	0.519317	-0.109182		0.533708	0.242182	0.453879		0.951717	0.208948	0.280208		0.243685	0.270399	0.358646		0.160819	1	0.189252		0.0873782	1	0.0558059		0.21088	1	-0.313147		0.0167433	1	-0.0310392			0.0961801	-0.102986	-0.225101	0.685506	0.3591
95	Q08043	ACTN3	Alpha-actinin-3 OS=Homo sapiens GN=ACTN3 PE=1 SV=2	ACTN3 (10)	ACTN3 (5)	ACTN3 (10;5)	Both		10	5		0.0820417	0.848697	0.0313706		0.555066	0.662389	-0.0748242		0.0471556	0.878438	0.0298455		1.20527	0.183183	0.358439		0.407624	1	0.256173		0.401353	1	0.238482		0.122999	0.969741	-0.0341969		0.894194	1	-0.266705			0.121567	-0.132673	0.137108	-0.068037	-0.154348
4699	Q9H082	RAB33B	Ras-related protein Rab-33B OS=Homo sapiens GN=RAB33B PE=1 SV=1	RAB33B (3)	RAB33B (1)	RAB33B (3;1)	Both		3	1		0.420438	0.498666	0.120606		1.3209	0.61923	-0.0930678		0.177011	0.60715	0.0961316		0.43934	0.22729	0.358274		0.145294	1	-0.0831115		0.127045	1	0.0767303		0.392617	1	-0.296925		0.127314	1	-0.0988355			0.00303951	-0.00304412	0.0384664	-0.105234	-0.0695516
5269	P30740	SERPINB1	Leukocyte elastase inhibitor OS=Homo sapiens GN=SERPINB1 PE=1 SV=1	SERPINB1 (5)	SERPINB1 (4)	SERPINB1 (5;4)	Both		5	4		0.0488765	0.95321	-0.00834438		0.081735	0.845885	-0.0406859		1.52569	0.206343	0.260324		0.724426	0.209516	0.358238		0.143248	1	-0.0410745		0.753815	1	-0.149221		0.275007	0.976809	-0.118107		0.0394409	1	0.019062			-0.0931125	0.0874119	-0.0450102	-0.188686	0.210932
5980	P29401	TKT	Transketolase OS=Homo sapiens GN=TKT PE=1 SV=3	TKT (60)	TKT (50)	TKT (60;50)	Both		60	50		0.188905	0.955953	0.00757141		0.171058	0.872407	0.0317636		1.2085	0.330493	0.177592		0.531833	0.219499	0.357434		0.0829944	1	-0.0167407		0.69898	1	-0.0796985		0.351476	1	-0.209106		0.172743	1	0.219071			0.0265467	-0.0270272	0.0157933	-0.0250596	0.148535
65	Q5T8D3	ACBD5	Acyl-CoA-binding domain-containing protein 5 OS=Homo sapiens GN=ACBD5 PE=1 SV=1	ACBD5 (3)	ACBD5 (4)	ACBD5 (3;4)	Both	Peroxisome	3	4		0.675561	0.586374	-0.0833899		0.512386	0.744398	0.0590673		0.402553	0.423714	0.151895		0.485479	0.225415	0.356249		0.757132	1	-0.296072		0.0443319	1	-0.0181556		0.394598	1	-0.265073		0.0466281	1	0.038745			0.0152491	-0.0154022	-0.0489233	0.0241566	0.261637
4935	Q8NCN4	RNF169	E3 ubiquitin-protein ligase RNF169 OS=Homo sapiens GN=RNF169 PE=1 SV=2	RNF169 (3)	RNF169 (2)	RNF169 (3;2)	Both		3	2		0.422221	0.300494	0.238649		0.0768645	0.812795	0.0519582		0.397838	0.222694	0.324271		0.782531	0.203772	0.356199		0.416001	1	-0.343188		0.0534079	1	-0.047015		0.0534637	0.966526	-0.0479792		0.0248547	1	-0.0169338			-0.122186	0.112572	0.0608321	-0.149914	0.0743943
3588	Q8NCW5	NAXE	NAD(P)H-hydrate epimerase OS=Homo sapiens GN=NAXE PE=1 SV=2	NAXE (6)	NAXE (7)	NAXE (6;7)	Both	Mitochondrion-Mtx	6	7		0.0529685	0.961509	-0.00779556		0.186617	0.895769	0.0256801		0.291756	0.443748	0.149388		0.302901	0.251024	0.355521		0.155668	1	-0.079423		0.240548	1	-0.122123		0.277689	1	-0.323992		0.0295125	1	0.0445573			0.0171299	-0.0173247	-0.0497803	-0.0165244	-0.00603699
3446	Q96H12	MSANTD3	Myb/SANT-like DNA-binding domain-containing protein 3 OS=Homo sapiens GN=MSANTD3 PE=1 SV=1	MSANTD3 (2)	MSANTD3 (1)	MSANTD3 (2;1)	Both		2	1		0.642368	0.653366	0.0617303		0.0751694	0.839694	-0.0437844		0.106738	0.530275	0.141566		0.24437	0.273586	0.355201		0.292302	1	-0.42658		0.166142	1	-0.216628		0.20143	1	-0.294813		0.0883601	1	0.143718			-0.0483219	0.0467265	0.089085	-0.215957	0.537867
3741	Q86X76	NIT1	Nitrilase homolog 1 OS=Homo sapiens GN=NIT1 PE=1 SV=2	NIT1 (7)	NIT1 (5)	NIT1 (7;5)	Both		7	5		1.0689	0.664543	-0.0584878		0.0535883	0.922957	0.0213336		1.53903	0.465719	0.106181		0.455872	0.228228	0.355102		0.706362	1	0.0570992		0.34878	1	-0.0635866		0.210952	0.9835	-0.15155		0.044161	1	-0.0369242			-0.0199546	0.0196701	-0.0556314	-0.0943847	0.124616
2326	B7ZAQ6	GPR89A	Golgi pH regulator A OS=Homo sapiens GN=GPR89A PE=1 SV=2	GPR89A (3)	GPR89A (2)	GPR89A (3;2)	Both		3	2		0.235193	0.687074	-0.0663808		1.30058	0.747961	0.0524241		2.49411	0.287487	0.188082		1.26429	0.195096	0.354966		0.756972	1	0.060453		0.17299	1	0.05842		0.135352	0.987733	0.0182078		0.773896	1	-0.115326			-0.0226822	0.022317	-0.152864	0.0406334	0.174574
4162	A6NDG6	PGP	Glycerol-3-phosphate phosphatase OS=Homo sapiens GN=PGP PE=1 SV=1	PGP (7)	PGP (7)	PGP (7;7)	Both		7	7		0.532283	0.460825	0.132722		0.627155	0.501022	0.155972		2.30474	0.306915	0.175223		0.498387	0.224326	0.353718		0.118859	1	0.00878285		1.63271	1	-0.147182		0.248109	1	-0.157731		0.0409488	1	-0.0366416			0.0144244	-0.0145607	0.0604505	0.086959	0.175822
3165	P29966	MARCKS	Myristoylated alanine-rich C-kinase substrate OS=Homo sapiens GN=MARCKS PE=1 SV=4	MARCKS (42)	MARCKS (27)	MARCKS (42;27)	Both		42	27		0.28001	0.7575	0.0486915		0.259108	0.872092	-0.0290119		0.550747	0.388778	0.161971		1.23111	0.194682	0.353363		0.16613	1	-0.0442744		0.382373	1	-0.10638		0.857038	1	-0.164268		0.0123814	1	0.00274953			0.0453762	-0.0468201	0.102089	-0.0636374	0.242778
5772	P63272	SUPT4H1	Transcription elongation factor SPT4 OS=Homo sapiens GN=SUPT4H1 PE=1 SV=1	SUPT4H1 (3)	SUPT4H1 (2)	SUPT4H1 (3;2)	Both		3	2		0.19131	0.487586	0.140454		0.0526864	0.81455	-0.0572972		0.578055	0.213461	0.304298		1.71733	0.172006	0.353348		0.259139	1	-0.224235		0.546824	1	-0.280574		0.376651	0.964525	-0.0666192		0.113112	1	0.121429			-0.0532268	0.0513009	-0.0876575	-0.375382	0.150795
6708	Q9H6R6	ZDHHC6	Palmitoyltransferase ZDHHC6 OS=Homo sapiens GN=ZDHHC6 PE=1 SV=1	ZDHHC6 (3)	ZDHHC6 (2)	ZDHHC6 (3;2)	Both		3	2		0.440122	0.352576	0.199928		0.694793	0.529482	0.134607		0.839743	0.369052	0.152392		0.552152	0.220173	0.353273		0.311842	1	0.0570639		0.218509	1	-0.0697747		0.189523	1	-0.210612		0.134299	1	0.0782906			-0.0922922	0.0866881	0.0626509	0.0730084	0.205603
6122	O14683	TP53I11	Tumor protein p53-inducible protein 11 OS=Homo sapiens GN=TP53I11 PE=1 SV=2	TP53I11 (2)	TP53I11 (1)	TP53I11 (2;1)	Both		2	1		0.244298	0.714862	-0.0514812		0.0276172	0.968654	0.00719586		0.397707	0.260332	0.276704		1.85974	0.169703	0.35172		0.155599	1	-0.110643		0.0867592	1	-0.0739473		0.4569	0.964645	-0.0646902		0.163027	1	0.0841426			-0.0797616	0.0755355	-0.098196	0.0510737	0.0600679
685	O43684	BUB3	Mitotic checkpoint protein BUB3 OS=Homo sapiens GN=BUB3 PE=1 SV=1	BUB3 (5)	BUB3 (9)	BUB3 (5;9)	Both		5	9		0.203211	0.78303	-0.0402253		0.24025	0.757048	0.0539119		0.462782	0.495878	0.1079		2.18609	0.167337	0.351652		0.0527034	1	-0.0227819		0.370923	1	-0.131688		1.86844	1	-0.155393		0.0770493	1	0.0182733			-0.10586	0.0985602	-0.0947112	-0.0133343	0.0326937
4226	Q13526	PIN1	Peptidyl-prolyl cis-trans isomerase NIMA-interacting 1 OS=Homo sapiens GN=PIN1 PE=1 SV=1	PIN1 (14)	PIN1 (10)	PIN1 (14;10)	Both		14	10		1.50493	0.376893	0.149735		0.399046	0.629481	0.0970466		0.2688	0.566521	0.10182		0.427918	0.229538	0.351548		0.382872	1	0.157824		0.01115	1	-0.00603349		0.313356	1	-0.245887		0.154968	1	0.204374			0.0599291	-0.0624865	0.176373	0.170362	0.217253
2942	Q6UWP7	LCLAT1	Lysocardiolipin acyltransferase 1 OS=Homo sapiens GN=LCLAT1 PE=1 SV=1	LCLAT1 (7)	LCLAT1 (8)	LCLAT1 (7;8)	Both	ER-Membrane	7	8		0.381865	0.62465	-0.0705814		0.0871527	0.89807	-0.0236255		0.144374	0.83957	-0.0311874		1.63474	0.173811	0.350955		0.040472	0.999612	0.00403173		0.114348	1	0.0145493		0.147185	0.964117	0.0409251		0.119378	1	-0.0349698			-0.147738	0.133924	-0.0649796	0.0306144	-0.00829764
4495	K7ELL7	PRKCSH	Glucosidase 2 subunit beta OS=Homo sapiens GN=PRKCSH PE=1 SV=1	PRKCSH (39)	PRKCSH (28)	PRKCSH (39;28)	Both		39	28		1.18691	0.639885	0.0629031		0.183384	0.944012	0.0123411		1.19141	0.33692	0.170019		3.84478	0.154446	0.35068		0.0225517	1	0.00530541		0.20068	1	-0.0601734		1.69253	0.978774	-0.0962203		0.221712	1	-0.0380349			-0.0391499	0.0380916	0.0765734	0.0274626	0.13525
2612	P98160	HSPG2	Basement membrane-specific heparan sulfate proteoglycan core protein OS=Homo sapiens GN=HSPG2 PE=1 SV=4	HSPG2 (17)	HSPG2 (17)	HSPG2 (17;17)	Both	Plasma membrane	17	17		0.275804	0.586615	0.08998		0.131032	0.882265	-0.0278135		0.0384795	0.913735	-0.020249		0.734463	0.212176	0.350433		0.729276	1	0.391701		0.400647	1	0.197714		0.0736895	0.973048	-0.0302038		0.634016	1	-0.260648			0.0763304	-0.0805432	0.189337	0.031561	-0.171762
2534	P07910	HNRNPC	Heterogeneous nuclear ribonucleoproteins C1/C2 OS=Homo sapiens GN=HNRNPC PE=1 SV=4	HNRNPC (36)	HNRNPC (24)	HNRNPC (36;24)	Both	Nuclear (100% filter)	36	24		0.370996	0.764034	-0.0481917		0.107294	0.890208	0.0288896		0.651435	0.214226	0.305024		0.820954	0.211429	0.350394		0.390481	1	-0.144857		0.297366	1	-0.108105		0.587408	1	-0.190339		0.0328759	1	-0.0244282			-0.00345247	0.00344225	-0.0868162	-0.0518256	0.192925
4166	Q96KR7	PHACTR3	Phosphatase and actin regulator 3 OS=Homo sapiens GN=PHACTR3 PE=1 SV=1	PHACTR3 (2)	PHACTR3 (1)	PHACTR3 (2;1)	Both		2	1		1.69694	0.172258	-0.429191		0.114288	0.652399	0.106576		0.099242	0.847396	0.0306687		0.984603	0.194901	0.349947		0.553494	1	-0.243611		0.5531	1	-0.114526		0.686115	1	-0.342939		0.481702	1	-0.223647			-0.0294325	0.0288257	-0.374022	-0.180071	-0.037913
3730	Q5SYE7	NHSL1	NHS-like protein 1 OS=Homo sapiens GN=NHSL1 PE=1 SV=2	NHSL1 (6)	NHSL1 (3)	NHSL1 (6;3)	Both		6	3		1.8282	0.44139	-0.119923		2.7115	0.208045	-0.38619		1.49069	0.527278	0.0894346		3.33401	0.160129	0.349515		0.984041	1	-0.0582868		0.233647	1	-0.0300848		2.21897	0.978737	-0.111603		1.86941	1	-0.168514			-0.00454155	0.0045243	-0.115427	-0.412475	0.0767238
4552	P28066	PSMA5	Proteasome subunit alpha type-5 OS=Homo sapiens GN=PSMA5 PE=1 SV=3	PSMA5 (19)	PSMA5 (17)	PSMA5 (19;17)	Both	Proteasome	19	17		1.49328	0.370428	0.15751		1.42906	0.463012	0.156209		2.58282	0.197268	0.26067		2.69261	0.168788	0.348696		0.0427445	1	-0.00599879		1.48281	1	-0.137885		0.407026	0.962775	-0.0412959		0.128594	1	0.0199446			-0.0236093	0.0232144	0.179955	0.132443	0.243733
4713	P61020	RAB5B	Ras-related protein Rab-5B OS=Homo sapiens GN=RAB5B PE=1 SV=1	RAB5B (4)	RAB5B (4)	RAB5B (4;4)	Both		4	4		0.0780328	0.929613	0.0132596		0.379855	0.618377	0.0987048		0.106544	0.91654	-0.0156278		0.978535	0.202501	0.347486		0.125187	1	-0.03602		0.644966	1	-0.132031		0.290857	0.96829	-0.0823963		0.000296828	1	0.000153072			-0.0855762	0.0807333	-0.0296475	0.0160419	-0.0493422
6631	O43592	XPOT	Exportin-T OS=Homo sapiens GN=XPOT PE=1 SV=2	XPOT (13)	XPOT (8)	XPOT (13;8)	Both		13	8		0.233512	0.755366	-0.0517371		0.195953	0.82396	-0.0440885		4.56195	0.24698	0.21221		0.868718	0.211949	0.347463		0.123242	1	-0.0391426		0.697819	1	0.13582		0.227158	0.960319	0.0562602		0.127325	1	-0.072004			0.0103632	-0.0104316	0.0158887	0.024638	0.212341
4848	Q6NUK4	REEP3	Receptor expression-enhancing protein 3 OS=Homo sapiens GN=REEP3 PE=1 SV=1	REEP3 (3)	REEP3 (2)	REEP3 (3;2)	Both	ER_high_curvature	3	2		1.04406	0.551604	0.0870997		1.03581	0.808405	0.039443		2.30394	0.151525	0.318753		1.77329	0.184098	0.347417		0.146898	1	0.0115428		0.146981	1	0.0287125		0.647817	0.97256	-0.069671		0.248148	1	0.0485368			0.00450921	-0.00452059	0.110289	0.0327984	0.34025
1186	P21964	COMT	Catechol O-methyltransferase OS=Homo sapiens GN=COMT PE=1 SV=2	COMT (5)	COMT (4)	COMT (5;4)	Both	ER-Membrane	5	4		0.24649	0.69542	0.0614034		0.351537	0.598084	0.113816		1.26198	0.200878	0.281139		0.832482	0.210376	0.34741		0.0175121	1	0.00793687		0.00650683	1	0.00148249		0.598202	1	-0.193917		0.240012	1	-0.076726			0.0621715	-0.06493	-0.0163866	0.211558	0.229918
2430	O94927	HAUS5	HAUS augmin-like complex subunit 5 OS=Homo sapiens GN=HAUS5 PE=1 SV=2	HAUS5 (3)	HAUS5 (1)	HAUS5 (3;1)	Both		3	1		0.355054	0.500845	0.118347		0.233193	0.576871	0.139395		1.64271	0.182479	0.290058		0.225431	0.28752	0.347306		0.275275	1	0.0386175		0.0172735	1	-0.00825576		0.064321	0.966162	-0.106548		0.0715623	1	-0.129078			-0.0254131	0.0249574	0.0149838	-0.0451115	0.246082
3648	P51970	NDUFA8	NADH dehydrogenase [ubiquinone] 1 alpha subcomplex subunit 8 OS=Homo sapiens GN=NDUFA8 PE=1 SV=3	NDUFA8 (3)	NDUFA8 (3)	NDUFA8 (3;3)	Both	Mitochondrion-Mtx	3	3		0.216594	0.594795	-0.0826694		0.248169	0.699222	0.0673616		0.553541	0.336587	-0.173482		0.459409	0.225454	0.347084		0.401831	1	0.193297		0.426581	1	0.123652		0.0871043	0.964699	-0.0800563		0.214437	1	-0.200595			-0.0903626	0.0849824	-0.195273	0.0314244	-0.0958678
2973	Q9H9Z2	LIN28A	Protein lin-28 homolog A OS=Homo sapiens GN=LIN28A PE=1 SV=1	LIN28A (11)	LIN28A (8)	LIN28A (11;8)	Both		11	8		0.961832	0.680686	-0.0554429		0.0925063	0.964325	-0.00784431		2.47909	0.337181	0.155592		0.616245	0.220202	0.346425		0.566662	1	-0.0700154		0.365066	1	-0.0711015		0.35182	1	-0.16827		0.124616	1	-0.0730224			-0.0212125	0.0208918	-0.0730444	-0.0307429	0.141113
2017	Q6P4F2	FDX2	Ferredoxin-2, mitochondrial OS=Homo sapiens GN=FDX2 PE=1 SV=1	FDX2 (1)	FDX2 (1)	FDX2 (1;1)	Both		1	1		0.258833	0.45189	0.146432		0.0134426	0.985389	-0.00394698		0.719006	0.251118	0.237774		0.684739	0.210998	0.346245		0.148389	1	0.0497065		0.0864684	1	-0.0295586		0.158515	0.968465	-0.0942288		0.244765	1	-0.205417			-0.216046	0.187756	-0.0366499	0.0104634	0.330099
1846	P30040	ERP29	Endoplasmic reticulum resident protein 29 OS=Homo sapiens GN=ERP29 PE=1 SV=4	ERP29 (18)	ERP29 (13)	ERP29 (18;13)	Both	ER-Lumen	18	13		2.27237	0.471075	0.110207		0.29512	0.753535	-0.0617211		0.652147	0.266367	0.249388		0.675606	0.21884	0.345897		0.34852	1	-0.104525		0.472442	1	-0.144383		0.329609	1	-0.145187		0.0370442	1	-0.0211618			0.00633926	-0.00636327	0.117967	-0.124998	0.340897
1252	P29373	CRABP2	Cellular retinoic acid-binding protein 2 OS=Homo sapiens GN=CRABP2 PE=1 SV=2	CRABP2 (62)	CRABP2 (52)	CRABP2 (62;52)	Both		62	52		0.153219	0.697356	-0.0592082		2.1412	0.191111	0.530711		0.876241	0.192067	0.296054		0.567076	0.218852	0.34573		0.158744	1	0.0930699		0.80702	1	-0.35637		0.340218	1	-0.208966		0.188824	1	-0.121662			-0.157154	0.141619	-0.173367	0.466827	0.184999
1785	P06733	ENO1	Alpha-enolase OS=Homo sapiens GN=ENO1 PE=1 SV=2	ENO1 (56)	ENO1 (65)	ENO1 (56;65)	Both		56	65		0.639795	0.512695	0.100774		1.03489	0.605978	0.0913308		1.39707	0.235114	0.234075		2.83925	0.164763	0.345279		0.136671	1	-0.02612		0.767638	1	-0.125572		1.11247	0.977956	-0.11473		0.364265	1	-0.0283237			-0.07285	0.0693047	0.0504537	0.0906793	0.277705
1358	Q96SQ9	CYP2S1	Cytochrome P450 2S1 OS=Homo sapiens GN=CYP2S1 PE=1 SV=2	CYP2S1 (3)	CYP2S1 (3)	CYP2S1 (3;3)	Both	ER-Membrane	3	3		0.0468121	0.926788	0.0162161		0.468493	0.476061	-0.177946		0.849941	0.279509	0.219098		0.668855	0.21893	0.343944		0.0606289	1	-0.0323633		0.131517	1	-0.0465469		0.25111	0.975023	-0.106685		0.42794	1	-0.190546			-0.0750311	0.0712771	0.114327	-0.289404	0.151609
4067	Q8NBM8	PCYOX1L	Prenylcysteine oxidase-like OS=Homo sapiens GN=PCYOX1L PE=1 SV=2	PCYOX1L (4)	PCYOX1L (4)	PCYOX1L (4;4)	Both		4	4		0.86286	0.234202	0.312532		0.633338	0.657922	0.079686		0.589227	0.73746	-0.0490228		0.480473	0.229096	0.342893		0.42558	1	0.107648		0.949704	1	0.146959		0.144698	0.964363	-0.0947732		0.165394	1	0.178434			-0.0618363	0.0592578	0.393385	0.0403146	-0.0248572
2344	Q9UBQ7	GRHPR	Glyoxylate reductase/hydroxypyruvate reductase OS=Homo sapiens GN=GRHPR PE=1 SV=1	GRHPR (11)	GRHPR (14)	GRHPR (11;14)	Both	Mitochondrion-Mtx	11	14		0.359541	0.642582	0.0719673		0.870361	0.41129	0.194196		0.42112	0.447842	0.136304		0.587472	0.221857	0.34266		0.0860314	1	0.0287872		0.336873	1	-0.109045		0.273149	0.992188	-0.138316		0.0345816	1	-0.0255141			-0.0251902	0.0247423	0.00912742	0.13517	0.0390275
3298	Q8N3F8	MICALL1	MICAL-like protein 1 OS=Homo sapiens GN=MICALL1 PE=1 SV=2	MICALL1 (9)	MICALL1 (5)	MICALL1 (9;5)	Both		9	5		1.06145	0.465426	-0.113115		0.0463699	0.973147	-0.00642433		0.398786	0.535712	0.103953		0.601621	0.219541	0.342598		0.198046	1	-0.0777415		0.00953876	1	0.00399303		0.169424	0.966529	-0.08775		0.0742275	1	-0.0536977			-0.0712572	0.0678607	-0.145928	-0.0419244	0.0233187
6316	Q9GZZ9	UBA5	Ubiquitin-like modifier-activating enzyme 5 OS=Homo sapiens GN=UBA5 PE=1 SV=1	UBA5 (3)	UBA5 (4)	UBA5 (3;4)	Both		3	4		0.350432	0.70852	-0.0584169		0.137779	0.814393	-0.0486265		0.587274	0.446791	0.133629		0.892744	0.211681	0.34255		0.343282	1	-0.0925391		0.287194	1	-0.0648003		0.915556	1	-0.259389		0.0181919	1	-0.00614442			-0.0345911	0.0337599	-0.109344	-0.155699	0.0724728
2300	P00505	GOT2	Aspartate aminotransferase, mitochondrial OS=Homo sapiens GN=GOT2 PE=1 SV=3	GOT2 (21)	GOT2 (27)	GOT2 (21;27)	Both	Mitochondrion-Mtx	21	27		0.519603	0.759771	0.0467232		0.250975	0.614365	0.112683		0.444886	0.457996	0.134136		0.540812	0.227077	0.342396		0.132702	1	-0.0378516		0.353277	1	-0.10231		0.382319	1	-0.217584		0.0809379	1	0.0857177			-0.0149794	0.014816	0.019899	-0.0242787	0.0482414
3267	Q9BUU2	METTL22	Methyltransferase-like protein 22 OS=Homo sapiens GN=METTL22 PE=1 SV=2	METTL22 (1)	METTL22 (1)	METTL22 (1;1)	Both		1	1		0.658796	0.219572	0.344932		0.0338355	0.95217	-0.0115268		0.678973	0.39644	0.139866		1.56327	0.181416	0.342384		1.33055	1	0.147628		0.00255207	1	0.00165825		0.374391	0.97599	-0.115018		1.90417	1	-0.233858			-0.23019	0.198348	0.493739	0.0536021	0.112986
1043	Q7LBR1	CHMP1B	Charged multivesicular body protein 1b OS=Homo sapiens GN=CHMP1B PE=1 SV=1	CHMP1B (1)	CHMP1B (4)	CHMP1B (1;4)	Both		1	4		1.25217	0.460999	-0.11256		0.123642	0.910627	0.0207254		0.520001	0.19717	0.344237		2.26653	0.173268	0.34161		0.227433	1	-0.136556		0.343798	1	-0.205532		0.495167	0.960259	-0.0631243		0.237209	1	-0.0268384			-0.0915311	0.0860158	-0.132161	-0.0258487	0.526255
145	P20933	AGA	N(4)-(beta-N-acetylglucosaminyl)-L-asparaginase OS=Homo sapiens GN=AGA PE=1 SV=2	AGA (3)	AGA (2)	AGA (3;2)	Both	Lysosome	3	2		0.247387	0.370924	-0.212844		0.57528	0.31203	-0.312598		0.205652	0.324441	0.257377		0.217911	0.297079	0.340825		0.0823431	1	0.117048		0.0313037	1	-0.0502258		0.0439919	0.960973	-0.0757996		0.00233036	0.999113	0.00533166			-0.0339448	0.0331437	0.0490159	-0.170461	0.639269
5550	Q9Y5X1	SNX9	Sorting nexin-9 OS=Homo sapiens GN=SNX9 PE=1 SV=1	SNX9 (8)	SNX9 (6)	SNX9 (8;6)	Both	Plasma membrane	8	6		0.524461	0.718063	0.0544765		0.465845	0.607418	0.10853		4.4098	0.158428	0.288375		0.909772	0.212404	0.340725		0.97315	1	0.0617502		0.0415882	1	0.00877198		0.043081	0.993687	-0.0121029		0.267798	1	-0.0657538			0.00154976	-0.00155048	0.0234941	0.174779	0.295682
4138	Q99471	PFDN5	Prefoldin subunit 5 OS=Homo sapiens GN=PFDN5 PE=1 SV=2	PFDN5 (9)	PFDN5 (13)	PFDN5 (9;13)	Both		9	13		0.934691	0.67709	0.0637209		0.15402	0.889719	-0.0283663		0.683361	0.444923	0.134754		2.05641	0.200237	0.339808		0.365187	1	-0.093136		0.5942	1	-0.173416		1.02902	1	-0.327609		0.184406	1	0.0781505			-0.00422284	0.00420761	0.0764878	-0.0843596	0.180439
6034	Q6UW68	TMEM205	Transmembrane protein 205 OS=Homo sapiens GN=TMEM205 PE=1 SV=1	TMEM205 (2)	TMEM205 (3)	TMEM205 (2;3)	Both	ER-Membrane	2	3		1.24733	0.258261	0.227572		0.688394	0.586193	-0.103379		0.463449	0.386838	0.157093		1.79489	0.179747	0.339112		0.059114	1	-0.0215991		0.234769	1	-0.080963		0.215758	0.963983	0.044633		0.459738	1	-0.143227			0.121285	-0.132337	0.275016	-0.0920437	0.258617
3334	Q96EY8	MMAB	Cob(I)yrinic acid a,c-diamide adenosyltransferase, mitochondrial OS=Homo sapiens GN=MMAB PE=1 SV=1	MMAB (7)	MMAB (8)	MMAB (7;8)	Both	Mitochondrion-Mtx	7	8		0.0294082	0.957852	0.00811328		1.94554	0.288667	0.283943		0.0652341	0.848965	0.0363254		1.28414	0.194822	0.338454		0.209166	1	0.110067		0.22286	1	-0.117207		0.699968	1	-0.170735		0.463943	1	-0.123278			-0.131569	0.120494	-0.0655269	0.27125	-0.127703
3913	Q5TC84	OGFRL1	Opioid growth factor receptor-like protein 1 OS=Homo sapiens GN=OGFRL1 PE=2 SV=1	OGFRL1 (2)	OGFRL1 (1)	OGFRL1 (2;1)	Both		2	1		0.213329	0.652101	-0.0705612		0.0237863	0.983084	-0.00446854		1.82326	0.181575	0.284894		1.99984	0.177345	0.338321		1.01038	1	-0.119364		0.653855	1	-0.16264		0.728028	0.978304	-0.121139		0.0837115	1	0.0237221			0.0805067	-0.0852104	-0.173753	-0.00836796	0.301913
6671	P27348	YWHAQ	14-3-3 protein theta OS=Homo sapiens GN=YWHAQ PE=1 SV=1	YWHAQ (28)	YWHAQ (29)	YWHAQ (28;29)	Both		28	29		0.0496581	0.909211	-0.0206476		2.70411	0.225756	0.453163		1.4395	0.337075	0.161455		0.823013	0.211232	0.337907		0.0337949	1	-0.0148716		1.19815	1	-0.233813		0.768108	1	-0.362293		0.0660239	1	0.051101			-0.066178	0.0632359	-0.140876	0.454775	0.163152
2480	P31937	HIBADH	3-hydroxyisobutyrate dehydrogenase, mitochondrial OS=Homo sapiens GN=HIBADH PE=1 SV=2	HIBADH (11)	HIBADH (10)	HIBADH (11;10)	Both		11	10		0.771217	0.416943	-0.138214		0.276079	0.525334	0.166786		0.472799	0.389112	0.160402		1.56383	0.190478	0.337328		0.291729	1	0.225783		0.0440698	1	0.0259761		0.469392	0.969157	-0.0898438		0.700932	1	-0.131801			-0.00203737	0.00203312	-0.195244	0.350149	0.261428
5914	Q9NZ01	TECR	Very-long-chain enoyl-CoA reductase OS=Homo sapiens GN=TECR PE=1 SV=1	TECR (8)	TECR (8)	TECR (8;8)	Both	ER-Membrane	8	8		0.693187	0.367774	0.166194		0.300221	0.744382	0.0552857		2.17678	0.112688	0.382268		0.655925	0.218734	0.337271		0.0676681	1	0.00812691		0.975171	1	0.103485		0.193005	0.964065	-0.0911261		0.469468	1	0.275746			0.122286	-0.133531	0.0885333	0.0984935	0.383868
2302	Q8IXQ4	GPALPP1	GPALPP motifs-containing protein 1 OS=Homo sapiens GN=GPALPP1 PE=1 SV=1	GPALPP1 (2)	GPALPP1 (1)	GPALPP1 (2;1)	Both		2	1		0.388383	0.553185	0.0941859		0.334887	0.833951	-0.034649		0.589152	0.158101	0.396897		0.53559	0.227922	0.337066		0.554729	1	-0.337674		0.069713	1	-0.0537218		0.143002	0.970807	-0.0821366		0.0688987	1	-0.0408681			-0.0306157	0.0299605	0.017091	-0.0495734	0.215944
5016	P05387	RPLP2	60S acidic ribosomal protein P2 OS=Homo sapiens GN=RPLP2 PE=1 SV=1	RPLP2 (17)	RPLP2 (16)	RPLP2 (17;16)	Both	Ribosome	17	16		0.368864	0.446069	-0.140428		0.303977	0.547082	0.145181		0.515974	0.4807	0.109656		1.32638	0.192741	0.337036		0.272314	1	-0.0584941		0.16815	1	-0.0396499		0.695504	1	-0.264666		0.629196	1	-0.18098			-0.0538217	0.0518536	-0.0258464	-0.00688055	0.168529
271	Q86W74	ANKRD46	Ankyrin repeat domain-containing protein 46 OS=Homo sapiens GN=ANKRD46 PE=1 SV=1	ANKRD46 (3)	ANKRD46 (3)	ANKRD46 (3;3)	Both		3	3		1.61942	0.241435	0.268282		1.29265	0.633078	0.0814961		1.03075	0.35718	-0.161078		0.428204	0.238289	0.335954		0.248373	1	0.130042		0.117119	1	-0.0500497		0.170194	0.975224	-0.125197		0.169521	1	-0.126044			0.0454471	-0.0468953	0.300957	0.0630835	-0.200879
3633	Q92597	NDRG1	Protein NDRG1 OS=Homo sapiens GN=NDRG1 PE=1 SV=1	NDRG1 (9)	NDRG1 (6)	NDRG1 (9;6)	Both		9	6		2.98548	0.115158	-0.53542		0.506228	0.368251	0.243536		1.16512	0.20868	0.269776		0.590791	0.224296	0.335549		0.320497	1	-0.161394		0.445503	1	0.0914452		1.05553	1	-0.6442		0.0865773	1	-0.0479655			0.0634451	-0.0663211	-0.533925	0.380682	0.205942
4037	P05165	PCCA	Propionyl-CoA carboxylase alpha chain, mitochondrial OS=Homo sapiens GN=PCCA PE=1 SV=4	PCCA (14)	PCCA (18)	PCCA (14;18)	Both		14	18		0.742375	0.523733	-0.0927761		0.497674	0.685825	0.0671238		0.510119	0.656142	0.0653812		2.10421	0.180192	0.33523		0.837283	1	0.0758842		0.56733	1	-0.0304316		1.32512	0.965368	-0.080369		0.793964	1	-0.166174			-0.116384	0.107627	-0.0942393	0.0881935	0.0575026
4579	Q15008	PSMD6	26S proteasome non-ATPase regulatory subunit 6 OS=Homo sapiens GN=PSMD6 PE=1 SV=1	PSMD6 (13)	PSMD6 (17)	PSMD6 (13;17)	Both	Proteasome	13	17		0.631702	0.480569	-0.112274		0.429251	0.765363	0.0488407		0.444078	0.737902	-0.0495805		1.24877	0.199985	0.335006		0.309582	1	0.0442856		0.898731	1	-0.0338942		0.353089	0.965991	-0.0812645		0.151259	1	-0.0577383			-0.0800631	0.0758059	-0.0594169	0.0343726	-0.0508466
5942	P07996	THBS1	Thrombospondin-1 OS=Homo sapiens GN=THBS1 PE=1 SV=2	THBS1 (6)	THBS1 (3)	THBS1 (6;3)	Both		6	3		0.867233	0.404174	-0.144154		2.81713	0.207126	-0.383247		0.476429	0.277996	0.245739		2.41106	0.175915	0.334678		0.130802	1	-0.0675055		0.084833	1	-0.0451725		0.666679	1	-0.140708		0.642309	1	-0.141881			0.0418779	-0.0431023	-0.0952756	-0.362126	0.0934092
2739	Q86U28	ISCA2	Iron-sulfur cluster assembly 2 homolog, mitochondrial OS=Homo sapiens GN=ISCA2 PE=1 SV=2	ISCA2 (1)	ISCA2 (1)	ISCA2 (1;1)	Both		1	1		1.19934	0.293869	-0.195676		0.0864458	0.927263	-0.0169083		0.0331652	0.922415	-0.017906		0.960868	0.208032	0.333408		0.30538	1	-0.198691		0.457941	1	-0.236121		0.407221	1	-0.253348		0.256368	1	-0.0817803			-0.0726333	0.0691083	-0.155914	-0.0528653	-0.17266
2527	Q13151	HNRNPA0	Heterogeneous nuclear ribonucleoprotein A0 OS=Homo sapiens GN=HNRNPA0 PE=1 SV=1	HNRNPA0 (16)	HNRNPA0 (15)	HNRNPA0 (16;15)	Both		16	15		0.589045	0.757527	-0.0424896		0.036692	0.981167	0.00508365		0.307248	0.567131	0.0996196		0.316257	0.26166	0.333217		0.328351	1	0.109695		0.295822	1	0.0969413		0.251478	1	-0.258386		0.0629534	1	-0.0750092			0.0430578	-0.044354	-0.0629676	0.0410488	0.198064
1127	Q9P003	CNIH4	Protein cornichon homolog 4 OS=Homo sapiens GN=CNIH4 PE=1 SV=1	CNIH4 (7)	CNIH4 (5)	CNIH4 (7;5)	Both		7	5		1.99795	0.585741	0.0746324		0.473331	0.687518	-0.0757176		3.24383	0.26047	0.205018		0.995351	0.214386	0.333153		0.0563058	1	0.0136645		0.488901	1	-0.0892807		0.12738	0.971858	0.0282535		0.0678381	1	-0.0252842			-0.0306447	0.0299885	0.0724238	-0.122533	0.205387
1591	Q9H3H5	DPAGT1	UDP-N-acetylglucosamine--dolichyl-phosphate N-acetylglucosaminephosphotransferase OS=Homo sapiens GN=DPAGT1 PE=1 SV=2	DPAGT1 (2)	DPAGT1 (2)	DPAGT1 (2;2)	Both	ER-Membrane	2	2		0.0502037	0.794336	-0.0524888		0.359141	0.288	0.429205		0.830117	0.116715	0.4548		0.41028	0.238993	0.333046		0.211507	1	0.281954		0.12696	1	0.130806		0.0481415	0.965749	-0.0416998		0.0818007	1	-0.0809021			0.152426	-0.170339	-0.358782	0.782051	0.595712
2067	Q96CP2	FLYWCH2	FLYWCH family member 2 OS=Homo sapiens GN=FLYWCH2 PE=1 SV=1	FLYWCH2 (7)	FLYWCH2 (5)	FLYWCH2 (7;5)	Both		7	5		1.39239	0.462807	-0.111087		0.347084	0.611779	0.106163		2.2297	0.287199	0.186518		0.382361	0.248835	0.332653		0.021382	1	-0.00370201		0.168623	1	-0.044628		0.414376	1	-0.35499		0.0778745	1	-0.0745573			0.0699612	-0.07348	-0.133481	0.198829	0.177459
2049	P26885	FKBP2	Peptidyl-prolyl cis-trans isomerase FKBP2 OS=Homo sapiens GN=FKBP2 PE=1 SV=2	FKBP2 (6)	FKBP2 (4)	FKBP2 (6;4)	Both	ER-Lumen	6	4		0.231399	0.731323	0.0552725		0.791365	0.424272	0.19075		0.760705	0.248	0.258121		3.06145	0.175355	0.332583		0.262665	1	-0.0706326		0.0349849	1	-0.0111183		0.0896031	0.987583	-0.0193524		0.94086	1	0.113025			0.0594988	-0.0620183	-0.0189706	0.128004	0.340319
3527	Q9UKX2	MYH2	Myosin-2 OS=Homo sapiens GN=MYH2 PE=1 SV=1	MYH2 (4)	MYH2 (3)	MYH2 (4;3)	Both		4	3		0.188166	0.553723	0.102496		0.25526	0.694304	-0.0676679		0.327542	0.595316	0.0795944		0.476987	0.229203	0.332026		1.50414	1	0.368247		1.40961	1	0.33625		0.135663	0.964178	0.0946199		0.628042	1	-0.454492			0.189586	-0.218174	0.258096	-0.132059	0.0262338
3465	P03928	MT-ATP8	ATP synthase protein 8 OS=Homo sapiens GN=MT-ATP8 PE=1 SV=1	MT-ATP8 (5)	MT-ATP8 (6)	MT-ATP8 (5;6)	Both		5	6		0.798279	0.469217	-0.121765		0.373851	0.636668	0.0956886		0.493229	0.299516	0.230129		0.612983	0.226928	0.33176		0.197997	1	0.111255		0.00976231	1	-0.00487093		0.297836	0.979211	-0.13255		0.0190292	1	-0.00918186			0.0290671	-0.0296459	-0.161601	0.171934	0.358738
950	Q00536	CDK16	Cyclin-dependent kinase 16 OS=Homo sapiens GN=CDK16 PE=1 SV=1	CDK16 (2)	CDK16 (2)	CDK16 (2;2)	Both		2	2		0.496387	0.187479	-0.463694		0.244545	0.68247	-0.0789431		0.580674	0.54157	0.0913866		2.46572	0.176043	0.33147		0.88339	1	-0.213615		0.0577305	1	-0.0113971		0.43034	1	-0.29611		0.545479	1	-0.0984676			-0.0658661	0.0629506	-0.205305	0.0184304	0.136641
2363	P15170	GSPT1	Eukaryotic peptide chain release factor GTP-binding subunit ERF3A OS=Homo sapiens GN=GSPT1 PE=1 SV=1	GSPT1 (9)	GSPT1 (7)	GSPT1 (9;7)	Both		9	7		0.365245	0.709485	-0.0511296		0.0566475	0.958355	0.00888036		0.398252	0.576736	0.0863914		1.64344	0.190802	0.33139		0.424769	1	-0.0937257		0.679842	1	-0.162657		0.80268	1	-0.154747		0.44255	1	-0.0802027			-0.112558	0.104345	-0.0291941	0.012491	0.149558
5742	Q13190	STX5	Syntaxin-5 OS=Homo sapiens GN=STX5 PE=1 SV=2	STX5 (10)	STX5 (9)	STX5 (10;9)	Both	Ergic/cisGolgi	10	9		2.25828	0.196045	-0.341536		0.593359	0.650998	0.0783741		0.432545	0.599621	0.077523		2.21515	0.179946	0.330922		0.194399	1	-0.0545073		0.125906	1	-0.0253163		0.633222	0.96468	-0.0568874		0.00372125	1	-0.000407636			-0.12261	0.112932	-0.368103	0.0607025	0.12448
499	P23634	ATP2B4	Plasma membrane calcium-transporting ATPase 4 OS=Homo sapiens GN=ATP2B4 PE=1 SV=2	ATP2B4 (11)	ATP2B4 (12)	ATP2B4 (11;12)	Both	Plasma membrane	11	12		0.47665	0.460801	-0.134956		0.377037	0.588233	0.123913		0.330161	0.581889	0.0950221		2.44544	0.181882	0.330713		0.0911937	1	-0.0451436		0.367449	1	-0.119667		2.02697	1	-0.348479		0.46623	1	-0.0375478			0.0368666	-0.0378093	-0.217151	0.221609	0.182081
3622	Q8NI08	NCOA7	Nuclear receptor coactivator 7 OS=Homo sapiens GN=NCOA7 PE=1 SV=2	NCOA7 (6)	NCOA7 (6)	NCOA7 (6;6)	Both		6	6		0.211278	0.750647	0.0503584		0.18009	0.814351	0.0448045		0.547594	0.228925	0.295009		2.99775	0.175517	0.330696		0.122945	1	-0.090207		0.0511224	1	0.0409373		0.419312	1	0.15367		0.35249	1	0.129913			-0.0336424	0.0328551	-0.0237986	-0.0319536	0.146545
2440	Q13547	HDAC1	Histone deacetylase 1 OS=Homo sapiens GN=HDAC1 PE=1 SV=1	HDAC1 (4)	HDAC1 (3)	HDAC1 (4;3)	Both		4	3		0.164848	0.62695	0.075947		0.497	0.334518	-0.276529		0.697092	0.117324	0.45541		0.811633	0.209118	0.330032		0.0716324	1	0.0488965		0.0226352	1	0.01591		0.599689	1	-0.249522		0.0412443	1	0.0273092			0.18651	-0.214106	0.170404	-0.466904	0.636815
3735	Q8N4C6	NIN	Ninein OS=Homo sapiens GN=NIN PE=1 SV=4	NIN (1)	NIN (1)	NIN (1;1)	Both		1	1		0.607029	0.344068	-0.187167		0.386253	0.346809	-0.28824		1.00176	0.145985	0.369245		0.965936	0.209506	0.329888		0.765991	1	-0.354374		0.691909	1	-0.240416		0.494908	1	-0.154897		0.482627	1	-0.219479			0.106468	-0.114881	-0.0959548	-0.067877	0.464331
6679	Q9ULJ3	ZBTB21	Zinc finger and BTB domain-containing protein 21 OS=Homo sapiens GN=ZBTB21 PE=1 SV=2	ZBTB21 (8)	ZBTB21 (5)	ZBTB21 (8;5)	Both		8	5		0.010768	0.99034	0.00155526		0.0721394	0.889642	-0.0292285		0.483637	0.286157	0.239527		1.37951	0.200158	0.32915		0.119235	1	0.0564306		0.191338	1	0.0890315		0.0896608	0.989229	0.0173711		0.121333	1	0.0508311			-0.0497951	0.0481037	0.0302802	-0.148699	0.0956847
14	Q9UDR5	AASS	Alpha-aminoadipic semialdehyde synthase, mitochondrial OS=Homo sapiens GN=AASS PE=1 SV=1	AASS (16)	AASS (17)	AASS (16;17)	Both		16	17		0.103785	0.939245	-0.0129351		0.0203213	0.992656	0.00236434		4.40744	0.16505	0.286722		0.474775	0.23676	0.328916		0.800984	1	0.0475759		0.018389	1	0.00176287		0.0648514	0.964728	-0.0446438		0.0053328	1	0.00529708			0.0100291	-0.0100929	0.0242555	-0.0303777	0.292797
1067	Q86X95	CIR1	Corepressor interacting with RBPJ 1 OS=Homo sapiens GN=CIR1 PE=1 SV=1	CIR1 (1)	CIR1 (1)	CIR1 (1;1)	Both		1	1		0.50846	0.292773	-0.227629		0.402325	0.290611	-0.413721		0.572282	0.452383	0.118152		0.529339	0.228034	0.328631		2.24642	1	-0.349165		0.505642	1	-0.199015		0.533624	1	-0.333618		0.900592	1	-0.639359			0.0207079	-0.0209962	-0.0962136	-0.729832	0.1283
5213	P55735	SEC13	Protein SEC13 homolog OS=Homo sapiens GN=SEC13 PE=1 SV=3	SEC13 (8)	SEC13 (8)	SEC13 (8;8)	Both		8	8		0.212045	0.619491	0.0834918		0.712716	0.399995	0.202912		1.88973	0.248096	0.216839		2.01761	0.184806	0.328522		0.334178	1	0.0771977		0.473213	1	-0.109913		0.501568	1	-0.135151		0.751359	1	-0.108093			-0.0336696	0.032881	-0.0396942	0.283942	0.193035
4323	Q9Y2G5	POFUT2	GDP-fucose protein O-fucosyltransferase 2 OS=Homo sapiens GN=POFUT2 PE=1 SV=3	POFUT2 (3)	POFUT2 (4)	POFUT2 (3;4)	Both		3	4		2.83054	0.219398	0.283222		0.520108	0.743103	0.0554419		0.482443	0.280778	0.245152		0.438951	0.241947	0.327836		0.127717	1	-0.0646464		0.189448	1	-0.089063		0.184134	0.977012	-0.128725		0.285134	1	0.205863			-0.0604374	0.0579709	0.288455	0.0219456	0.100799
2660	O00425	IGF2BP3	Insulin-like growth factor 2 mRNA-binding protein 3 OS=Homo sapiens GN=IGF2BP3 PE=1 SV=2	IGF2BP3 (23)	IGF2BP3 (22)	IGF2BP3 (23;22)	Both		23	22		0.523382	0.577977	-0.0795917		0.38013	0.767162	0.0487229		0.994829	0.421427	0.124226		1.57279	0.194884	0.327048		0.157554	1	-0.0173458		0.739643	1	-0.118148		0.502031	0.975565	-0.102102		0.132455	1	-0.0389364			-0.101552	0.0948129	-0.123883	0.0308676	0.0923215
2959	P09382	LGALS1	Galectin-1 OS=Homo sapiens GN=LGALS1 PE=1 SV=2	LGALS1 (9)	LGALS1 (7)	LGALS1 (9;7)	Both		9	7		0.368971	0.675466	-0.0639055		1.20426	0.679266	0.0682103		2.083	0.226308	0.234943		0.689773	0.224411	0.327011		0.138723	1	-0.0148669		0.643047	1	-0.107168		0.364613	0.994173	-0.143091		0.183448	1	-0.0692974			0.0223472	-0.0226844	-0.118064	0.067843	0.209096
3838	Q8TCD5	NT5C	5'(3')-deoxyribonucleotidase, cytosolic type OS=Homo sapiens GN=NT5C PE=1 SV=2	NT5C (4)	NT5C (5)	NT5C (4;5)	Both		4	5		3.9439	0.401531	0.134204		0.0646637	0.974048	0.00686503		0.875958	0.187163	0.330726		0.568428	0.229167	0.326765		0.169866	1	-0.0449776		0.924315	1	-0.259105		0.0321373	0.992502	-0.0177702		0.000235543	0.999933	-0.000130676			0.0091722	-0.009225	0.136437	0.0377425	0.402333
4320	O00592	PODXL	Podocalyxin OS=Homo sapiens GN=PODXL PE=1 SV=2	PODXL (2)	PODXL (2)	PODXL (2;2)	Both		2	2		0.774903	0.331336	0.186923		0.588962	0.689441	0.066905		1.70774	0.186979	0.278606		1.68842	0.192804	0.326488		0.644348	1	0.0978311		0.281508	1	0.0555179		0.520801	0.978703	-0.0973515		0.44977	1	-0.0757991			0.109767	-0.118733	0.257005	0.0680254	0.320101
1460	O43583	DENR	Density-regulated protein OS=Homo sapiens GN=DENR PE=1 SV=2	DENR (6)	DENR (4)	DENR (6;4)	Both		6	4		1.4714	0.25023	0.234186		0.112223	0.673683	0.0969029		0.610396	0.226337	0.282646		0.199787	0.316264	0.325687		0.267572	1	-0.123081		0.474197	1	-0.264322		0.269137	1	-0.442303		0.00136428	0.998903	-0.00273247			0.110858	-0.120012	0.190132	-0.165503	0.143189
6328	Q969M7	UBE2F	NEDD8-conjugating enzyme UBE2F OS=Homo sapiens GN=UBE2F PE=1 SV=1	UBE2F (2)	UBE2F (2)	UBE2F (2;2)	Both		2	2		0.370735	0.698805	-0.0586385		0.30873	0.432889	0.223037		0.30848	0.319083	0.233009		0.370575	0.253484	0.325428		0.193101	1	-0.143528		0.334504	1	-0.252036		0.389225	1	-0.327692		0.118516	1	-0.112938			0.0234452	-0.0238173	-0.107974	0.00495113	0.00504865
3217	P48163	ME1	NADP-dependent malic enzyme OS=Homo sapiens GN=ME1 PE=1 SV=1	ME1 (6)	ME1 (5)	ME1 (6;5)	Both		6	5		0.536422	0.554596	-0.0973218		1.03071	0.823645	-0.0380995		0.157687	0.956719	0.00998481		1.23094	0.216745	0.32441		0.227596	1	-0.0331508		0.42288	1	0.028497		1.23067	1	-0.219075		0.333492	1	0.0590324			-0.000634325	0.000633617	-0.146012	-0.0281458	0.0291458
5582	Q9BVQ7	SPATA5L1	Spermatogenesis-associated protein 5-like protein 1 OS=Homo sapiens GN=SPATA5L1 PE=1 SV=2	SPATA5L1 (5)	SPATA5L1 (2)	SPATA5L1 (5;2)	Both		5	2		0.520436	0.466652	0.132021		1.492	0.872704	-0.0261101		2.91811	0.257735	0.210292		0.89618	0.220041	0.323874		0.794282	1	0.0970087		1.12404	1	-0.0411359		0.820545	1	-0.264561		0.0823982	1	-0.0348372			-0.0133978	0.0132661	0.0635231	-0.028946	0.219188
152	Q9UL18	AGO1	Protein argonaute-1 OS=Homo sapiens GN=AGO1 PE=1 SV=3	AGO1 (14)	AGO1 (9)	AGO1 (14;9)	Both		14	9		0.0779111	0.913433	-0.0191207		0.291405	0.92771	-0.0160247		0.562913	0.33789	0.191763		0.519368	0.235543	0.323663		0.00110538	0.998308	-0.000516314		0.13333	1	-0.0526646		0.215027	0.972325	-0.118205		0.129382	1	0.144124			-0.0401038	0.0389947	-0.0914303	-0.00753952	0.0990893
3856	Q8WVJ2	NUDCD2	NudC domain-containing protein 2 OS=Homo sapiens GN=NUDCD2 PE=1 SV=1	NUDCD2 (3)	NUDCD2 (2)	NUDCD2 (3;2)	Both		3	2		0.32157	0.628479	-0.0696529		0.280734	0.643596	0.086417		1.34247	0.199048	0.271162		0.324937	0.263248	0.323323		0.126124	1	0.0761614		0.506679	1	-0.159846		0.265238	1	-0.261642		0.0750415	1	-0.0797252			0.0460655	-0.0475546	-0.10898	0.166252	0.261848
4598	Q13635	PTCH1	Protein patched homolog 1 OS=Homo sapiens GN=PTCH1 PE=1 SV=2	PTCH1 (1)	PTCH1 (2)	PTCH1 (1;2)	Both		1	2		0.138625	0.698439	-0.0618544		0.259486	0.719965	-0.0614536		0.561302	0.362904	0.159572		0.496175	0.231931	0.322813		0.603888	1	-0.18053		0.321411	1	-0.150708		0.332555	1	-0.213334		0.117304	1	-0.0759681			0.119595	-0.130326	0.0617349	-0.120414	0.0666375
3664	P17568	NDUFB7	NADH dehydrogenase [ubiquinone] 1 beta subcomplex subunit 7 OS=Homo sapiens GN=NDUFB7 PE=1 SV=4	NDUFB7 (3)	NDUFB7 (2)	NDUFB7 (3;2)	Both	Mitochondrion-Mtx	3	2		0.101233	0.937353	-0.0116823		0.119262	0.889133	-0.0268692		0.536892	0.303952	0.217982		0.675328	0.22725	0.322405		0.0802196	1	0.0550077		0.270906	1	-0.102877		0.550887	1	-0.248862		0.035431	1	-0.020664			-0.0814699	0.0770665	-0.0349729	0.0374417	0.33215
5543	O60493	SNX3	Sorting nexin-3 OS=Homo sapiens GN=SNX3 PE=1 SV=3	SNX3 (2)	SNX3 (1)	SNX3 (2;1)	Both	Endosome	2	1		0.347614	0.257656	-0.321312		0.985535	0.22288	0.531024		0.224601	0.629567	0.0821629		0.157488	0.34926	0.322305		0.0955362	1	0.125303		0.165508	1	0.152645		0.194521	1	-0.395589		0.00640856	1	0.0157051			0.0983738	-0.105507	-0.600595	0.648622	0.192392
5512	O75324	SNN	Stannin OS=Homo sapiens GN=SNN PE=1 SV=1	SNN (1)	SNN (1)	SNN (1;1)	Both		1	1		1.4609	0.321081	0.176805		2.61658	0.233128	0.460243		0.430486	0.490693	0.112633		1.61705	0.195407	0.322113		0.742266	1	0.225436		0.735383	1	0.213778		0.395261	1	0.13836		1.04354	1	0.240301			0.104789	-0.112926	0.157903	0.464987	0.028368
3742	Q9NQR4	NIT2	Omega-amidase NIT2 OS=Homo sapiens GN=NIT2 PE=1 SV=1	NIT2 (11)	NIT2 (10)	NIT2 (11;10)	Both		11	10		0.191388	0.649662	-0.0765615		0.96603	0.495911	0.142833		0.654167	0.454506	0.120924		0.63244	0.227779	0.321249		0.394218	1	0.104686		0.370512	1	-0.06972		0.418451	1	-0.194627		0.257303	1	-0.138465			-0.0780206	0.0739712	-0.200459	0.185819	0.06293
4551	P25789	PSMA4	Proteasome subunit alpha type-4 OS=Homo sapiens GN=PSMA4 PE=1 SV=1	PSMA4 (11)	PSMA4 (13)	PSMA4 (11;13)	Both	Proteasome	11	13		0.0201065	0.973279	0.00521628		0.462811	0.364466	0.249553		0.205782	0.447495	0.15489		0.509172	0.234452	0.32115		0.00147873	0.998772	0.00124044		0.184679	1	-0.139444		0.172685	0.968656	-0.102501		0.089006	1	-0.0708482			-0.056766	0.0545828	-0.0618482	0.0867731	-0.0788193
3828	Q96IY1	NSL1	Kinetochore-associated protein NSL1 homolog OS=Homo sapiens GN=NSL1 PE=1 SV=3	NSL1 (2)	NSL1 (2)	NSL1 (2;2)	Both		2	2		0.217138	0.582734	0.0972384		0.51761	0.388181	-0.233113		1.65955	0.116528	0.394901		0.631093	0.229207	0.321059		0.381927	1	-0.10837		0.130331	1	0.0183892		0.219968	0.977593	0.108197		0.250454	1	-0.118363			-0.0341331	0.0333233	0.233876	-0.109536	0.434533
3568	P54802	NAGLU	Alpha-N-acetylglucosaminidase OS=Homo sapiens GN=NAGLU PE=1 SV=2	NAGLU (10)	NAGLU (5)	NAGLU (10;5)	Both	Lysosome	10	5		0.859905	0.662459	0.0598008		1.64347	0.478002	-0.144015		2.32368	0.209684	0.246255		3.07143	0.181551	0.320951		0.0728635	1	0.0460022		0.247205	1	-0.113023		1.23389	0.995697	-0.121127		0.21228	1	0.0969084			-0.0434561	0.0421588	0.0568679	-0.168543	0.270016
3794	P61916	NPC2	Epididymal secretory protein E1 OS=Homo sapiens GN=NPC2 PE=1 SV=1	NPC2 (1)	NPC2 (2)	NPC2 (1;2)	Both	Lysosome	1	2		0.90334	0.413821	0.140056		0.579969	0.581343	0.114443		1.83896	0.256837	0.211852		2.56276	0.189611	0.320885		0.275301	1	0.02742		0.0269987	1	0.0107025		0.0294236	0.998585	-0.00273173		0.480484	1	-0.148481			0.0682704	-0.0716158	0.0923504	0.0526138	0.240732
3007	Q14693	LPIN1	Phosphatidate phosphatase LPIN1 OS=Homo sapiens GN=LPIN1 PE=1 SV=2	LPIN1 (2)	LPIN1 (1)	LPIN1 (2;1)	Both		2	1		0.650714	0.241948	-0.311555		1.1258	0.210571	0.447517		0.340636	0.240311	0.316976		1.01367	0.211461	0.320798		0.37251	1	-0.343757		0.241233	1	0.222042		0.313925	1	-0.149131		0.0159371	1	0.00943063			0.0987996	-0.105997	-0.179225	0.542784	0.594362
3354	Q8NHP6	MOSPD2	Motile sperm domain-containing protein 2 OS=Homo sapiens GN=MOSPD2 PE=1 SV=1	MOSPD2 (11)	MOSPD2 (9)	MOSPD2 (11;9)	Both	ER-Membrane	11	9		0.13585	0.760765	0.0528537		0.384475	0.798316	0.0472188		0.787496	0.322827	0.19335		0.897639	0.219593	0.320531		0.411469	1	-0.0778552		0.00977806	1	0.00209143		0.00104179	1	0.000308335		0.234961	1	-0.062629			0.0316798	-0.0323705	0.170349	0.0848223	0.25042
755	Q9BUH6	C9orf142	Protein PAXX OS=Homo sapiens GN=C9orf142 PE=1 SV=2	C9orf142 (5)	C9orf142 (4)	C9orf142 (5;4)	Both		5	4		0.275905	0.574163	0.0860322		0.0498963	0.949663	0.0121417		0.92959	0.214125	0.265224		0.755039	0.218525	0.320299		0.033119	1	-0.0205135		0.499748	1	-0.149056		0.0407745	0.98136	0.0256304		0.186267	1	-0.0792741			-0.208467	0.182004	-0.00915689	-0.00128881	0.171695
1787	P13929	ENO3	Beta-enolase OS=Homo sapiens GN=ENO3 PE=1 SV=5	ENO3 (8)	ENO3 (3)	ENO3 (8;3)	Both		8	3		0.639849	0.402743	0.147427		0.862619	0.404178	0.1864		2.66461	0.0635676	0.537118		1.91434	0.192579	0.320251		0.137948	1	0.085288		0.0507102	1	-0.00947627		0.869142	0.978568	-0.10959		0.842081	1	0.0927091			0.145199	-0.161357	0.0726738	0.247249	0.493512
3215	P21741	MDK	Midkine OS=Homo sapiens GN=MDK PE=1 SV=1	MDK (1)	MDK (4)	MDK (1;4)	Both		1	4		1.07968	0.128	-0.70204		0.437799	0.229263	0.516055		0.983913	0.21368	-0.260385		0.094409	0.438009	0.320165		0.352252	1	0.576873		0.188919	1	0.273272		0.266285	1	-0.876005		0.0539644	1	0.314847			0.190817	-0.219809	-0.873974	0.854643	-0.193187
5410	O00400	SLC33A1	Acetyl-coenzyme A transporter 1 OS=Homo sapiens GN=SLC33A1 PE=1 SV=1	SLC33A1 (3)	SLC33A1 (3)	SLC33A1 (3;3)	Both	ER-Membrane	3	3		0.479168	0.643673	0.0643634		0.55597	0.562002	-0.117909		0.93226	0.442267	0.118464		0.630741	0.228372	0.319908		0.0809479	1	-0.0379013		0.0737419	1	0.0100904		0.232047	0.9811	-0.126254		0.162318	1	-0.0790059			-0.0754052	0.0716146	0.0440826	-0.186353	0.104457
5493	Q53HV7	SMUG1	Single-strand selective monofunctional uracil DNA glycosylase OS=Homo sapiens GN=SMUG1 PE=1 SV=2	SMUG1 (1)	SMUG1 (1)	SMUG1 (1;1)	Both		1	1		0.147534	0.738128	-0.0497977		0.753857	0.357207	0.215537		0.556195	0.3619	-0.158555		0.894888	0.21033	0.319293		0.391661	1	0.2345		1.03549	1	0.185156		0.0497447	0.983545	0.020634		0.226189	1	-0.102261			-0.313649	0.257339	-0.102242	0.146137	-0.139341
1481	Q6UWP2	DHRS11	Dehydrogenase/reductase SDR family member 11 OS=Homo sapiens GN=DHRS11 PE=1 SV=1	DHRS11 (8)	DHRS11 (7)	DHRS11 (8;7)	Both		8	7		0.251747	0.455437	0.154542		0.360207	0.545566	0.149888		0.325256	0.320293	0.229175		0.517465	0.23917	0.319082		0.349887	1	0.243516		0.125351	1	0.0977314		0.00961768	0.995735	-0.0077879		0.0347101	1	-0.0311502			0.0172482	-0.0174458	-0.032735	0.026376	0.0181761
6336	P61081	UBE2M	NEDD8-conjugating enzyme Ubc12 OS=Homo sapiens GN=UBE2M PE=1 SV=1	UBE2M (7)	UBE2M (3)	UBE2M (7;3)	Both		7	3		0.406452	0.776124	0.0409681		1.42839	0.387821	0.193084		2.85899	0.227056	0.226835		0.475217	0.243718	0.318929		0.0539194	1	0.0386873		0.282689	1	-0.0686947		0.236796	0.979545	-0.144851		0.0922829	1	-0.0602224			0.0164249	-0.0166034	0.00959185	0.225929	0.216411
2532	D6RBZ0	HNRNPAB	Heterogeneous nuclear ribonucleoprotein A/B OS=Homo sapiens GN=HNRNPAB PE=1 SV=1	HNRNPAB (14)	HNRNPAB (20)	HNRNPAB (14;20)	Both		14	20		0.746986	0.914366	-0.0157827		3.1305	0.555817	-0.111136		0.71594	0.362688	0.171621		0.476509	0.245441	0.318735		0.0643913	1	-0.030829		0.0704691	1	-0.0252018		0.376087	1	-0.230019		0.104941	1	0.146844			0.00307109	-0.00307566	-0.01747	-0.113501	0.115723
4261	Q15111	PLCL1	Inactive phospholipase C-like protein 1 OS=Homo sapiens GN=PLCL1 PE=1 SV=3	PLCL1 (11)	PLCL1 (11)	PLCL1 (11;11)	Both		11	11		1.51059	0.190576	-0.372732		0.740013	0.527857	-0.143378		0.0916278	0.895771	0.0231048		1.1194	0.216518	0.318152		0.334291	1	-0.081956		0.0645575	1	-0.01927		1.11131	1	-0.26509		0.146354	1	0.0236532			0.00846914	-0.0085137	-0.338471	-0.191547	0.0977423
4654	P32322	PYCR1	Pyrroline-5-carboxylate reductase 1, mitochondrial OS=Homo sapiens GN=PYCR1 PE=1 SV=2	PYCR1 (9)	PYCR1 (8)	PYCR1 (9;8)	Both	Mitochondrion-Mtx	9	8		0.741129	0.4135	0.149868		0.0729221	0.928365	0.01899		3.26544	0.186912	0.264968		0.435759	0.249575	0.317812		0.759881	1	-0.0296757		0.0854404	1	0.0095015		0.0486108	0.970522	0.0351821		0.0210739	1	-0.0174082			-0.0113718	0.0112759	0.203861	-0.0575387	0.275391
2063	O75955	FLOT1	Flotillin-1 OS=Homo sapiens GN=FLOT1 PE=1 SV=3	FLOT1 (22)	FLOT1 (17)	FLOT1 (22;17)	Both		22	17		0.88351	0.639351	0.0687551		3.85746	0.388615	0.178293		3.20131	0.190132	0.265567		0.989766	0.220246	0.317573		1.38531	1	0.122834		0.0924399	1	-0.00685428		0.274815	0.96183	-0.0509105		0.000693171	1	0.000167266			0.0263691	-0.0268429	0.089519	0.183629	0.253946
5524	P62318	SNRPD3	Small nuclear ribonucleoprotein Sm D3 OS=Homo sapiens GN=SNRPD3 PE=1 SV=1	SNRPD3 (9)	SNRPD3 (6)	SNRPD3 (9;6)	Both		9	6		0.996048	0.545511	-0.0842891		2.00588	0.38417	0.188068		2.33094	0.20737	0.249236		0.47859	0.246043	0.314134		0.385743	1	0.161355		0.626157	1	0.0581929		0.120911	0.965936	-0.083856		0.202948	1	-0.122941			-0.0570548	0.0548499	-0.107279	0.182584	0.223294
3759	O00746	NME4	Nucleoside diphosphate kinase, mitochondrial OS=Homo sapiens GN=NME4 PE=1 SV=1	NME4 (3)	NME4 (3)	NME4 (3;3)	Both		3	3		0.367375	0.660737	0.0666252		0.209591	0.837906	0.0373807		3.02477	0.152206	0.303433		2.82135	0.190778	0.313983		0.109918	1	-0.0326953		0.0734471	1	0.0176249		0.408168	0.963024	0.0446703		0.719727	1	-0.0781447			0.0275671	-0.0280863	0.122264	-0.0175624	0.284031
5885	Q9Y4P3	TBL2	Transducin beta-like protein 2 OS=Homo sapiens GN=TBL2 PE=1 SV=1	TBL2 (6)	TBL2 (6)	TBL2 (6;6)	Both	ER-Lumen	6	6		1.3217	0.322537	-0.182227		0.400068	0.284075	0.41		0.298161	0.49007	0.12626		0.385636	0.260939	0.313677		0.195076	1	0.27366		0.0198015	1	0.028628		0.31476	1	-0.248363		0.000373826	1	-0.00034076			0.0571038	-0.0594193	-0.218884	0.706666	0.254653
4154	P00558	PGK1	Phosphoglycerate kinase 1 OS=Homo sapiens GN=PGK1 PE=1 SV=3	PGK1 (82)	PGK1 (68)	PGK1 (82;68)	Both		82	68		0.652295	0.848552	0.0263964		1.22524	0.350507	0.228003		0.839959	0.241437	0.259544		1.87276	0.204846	0.313676		0.163028	1	0.113897		0.141624	1	-0.0553816		1.23142	1	-0.152252		0.157266	1	-0.02398			0.0403506	-0.041485	0.0296455	0.264847	0.327059
4403	Q8WY54	PPM1E	Protein phosphatase 1E OS=Homo sapiens GN=PPM1E PE=1 SV=2	PPM1E (6)	PPM1E (13)	PPM1E (6;13)	Both		6	13		0.072334	0.957379	0.00836196		0.16773	0.844145	0.0391029		0.101538	0.98104	-0.00369147		1.00663	0.219671	0.313643		0.872347	1	0.0952962		2.18527	1	0.0754709		0.424187	0.96709	-0.0799152		0.00939065	1	0.00666713			0.0206473	-0.020934	0.0417248	0.110063	-0.00811404
3100	Q969L2	MAL2	Protein MAL2 OS=Homo sapiens GN=MAL2 PE=1 SV=1	MAL2 (1)	MAL2 (1)	MAL2 (1;1)	Both		1	1		0.0780681	0.66985	-0.0852708		0.0376768	0.887523	0.0340802		0.688108	0.507771	-0.096896		1.87941	0.198152	0.313021		0.178227	1	-0.0220618		1.05348	1	0.151969		1.32121	1	-0.432792		0.326628	1	-0.141913			0.0257403	-0.0261912	-0.410256	-0.227383	-0.133799
250	Q9UJX6	ANAPC2	Anaphase-promoting complex subunit 2 OS=Homo sapiens GN=ANAPC2 PE=1 SV=1	ANAPC2 (2)	ANAPC2 (2)	ANAPC2 (2;2)	Both		2	2		0.132723	0.764096	0.0494829		1.14035	0.486188	-0.14314		0.325392	0.748598	0.0475804		0.739652	0.225466	0.312998		0.205659	1	0.16024		0.432988	1	-0.0800365		0.217611	1	-0.194388		0.0464207	1	-0.0631647			0.0485531	-0.0502119	-0.0640864	-0.178447	0.0101673
6415	P22695	UQCRC2	Cytochrome b-c1 complex subunit 2, mitochondrial OS=Homo sapiens GN=UQCRC2 PE=1 SV=3	UQCRC2 (19)	UQCRC2 (19)	UQCRC2 (19;19)	Both	Mitochondrion-IM	19	19		0.429373	0.601336	0.0862525		0.12117	0.928876	-0.0187207		3.63866	0.310575	0.168635		5.04919	0.18222	0.312515		0.0287021	0.999684	0.00535333		0.335854	1	-0.0894408		0.675425	0.974504	-0.111985		0.0635694	1	-0.0174068			-0.008767	0.00870849	0.028415	-0.0652954	0.175333
2065	Q9NZU0	FLRT3	Leucine-rich repeat transmembrane protein FLRT3 OS=Homo sapiens GN=FLRT3 PE=1 SV=1	FLRT3 (3)	FLRT3 (2)	FLRT3 (3;2)	Both		3	2		0.740978	0.629839	-0.0659519		0.211302	0.619572	-0.111282		0.83624	0.249212	-0.24763		0.30528	0.284565	0.312083		0.0233524	1	0.0175568		0.0538934	1	0.0234751		0.0368298	0.963736	0.108317		0.527937	1	-0.611624			-0.0609566	0.0584488	-0.0471977	-0.274267	-0.326625
1680	P24534	EEF1B2	Elongation factor 1-beta OS=Homo sapiens GN=EEF1B2 PE=1 SV=3	EEF1B2 (21)	EEF1B2 (20)	EEF1B2 (21;20)	Both		21	20		0.115763	0.807019	-0.041026		1.92077	0.386363	0.183479		0.193678	0.846818	0.0307914		0.361745	0.267882	0.312006		0.265298	1	0.0624115		0.382588	1	-0.058325		0.208912	1	-0.174314		0.0532392	1	-0.0557621			-0.0252713	0.0248206	-0.147942	0.178977	-0.0163128
2222	P32189	GK	Glycerol kinase OS=Homo sapiens GN=GK PE=1 SV=3	GK (3)	GK (4)	GK (3;4)	Both	Mitochondrion-Mtx	3	4		0.174823	0.568328	-0.100903		0.580523	0.555937	0.117524		0.262022	0.5574	-0.0957802		0.633014	0.22802	0.312001		0.289845	1	0.106823		0.138631	1	0.0736109		0.321833	1	-0.158948		0.420029	1	-0.214697			-0.213742	0.186013	-0.282236	0.147036	-0.211008
2580	Q8IWL3	HSCB	Iron-sulfur cluster co-chaperone protein HscB, mitochondrial OS=Homo sapiens GN=HSCB PE=1 SV=3	HSCB (1)	HSCB (1)	HSCB (1;1)	Both	Mitochondrion-Mtx	1	1		0.0670207	0.92971	-0.0130396		0.349944	0.54049	-0.145774		1.05901	0.370548	0.145671		1.46374	0.206347	0.31185		0.56364	1	-0.0695418		1.40329	1	-0.0909923		0.11641	0.968978	-0.0326117		0.00536071	0.999314	-0.00155447			0.0509892	-0.0528236	-0.0503626	-0.278556	0.13018
1191	Q9Y678	COPG1	Coatomer subunit gamma-1 OS=Homo sapiens GN=COPG1 PE=1 SV=1	COPG1 (17)	COPG1 (16)	COPG1 (17;16)	Both		17	16		0.976567	0.292524	0.222321		2.30269	0.75837	0.0481528		2.47518	0.721863	0.0496214		0.469032	0.251586	0.310075		0.754946	1	0.170596		0.493953	1	0.0533807		0.0908327	0.962594	-0.0560104		0.205124	1	0.216947			0.0107248	-0.0107983	0.262363	0.0529461	0.0518581
2296	Q9H8Y8	GORASP2	Golgi reassembly-stacking protein 2 OS=Homo sapiens GN=GORASP2 PE=1 SV=3	GORASP2 (4)	GORASP2 (3)	GORASP2 (4;3)	Both	Golgi	4	3		0.0182044	0.949052	-0.011833		1.37632	0.398222	0.181378		0.0217146	0.960953	-0.00996142		1.17878	0.211803	0.309692		0.253944	1	0.105357		0.138315	1	-0.0693494		0.176068	0.965072	-0.0420806		0.0232485	1	0.0101382			-0.141282	0.128594	-0.195997	0.15283	-0.139202
3890	Q99567	NUP88	Nuclear pore complex protein Nup88 OS=Homo sapiens GN=NUP88 PE=1 SV=2	NUP88 (8)	NUP88 (8)	NUP88 (8;8)	Both	Nuclear pore complex	8	8		0.53869	0.676379	0.0634853		0.0127652	0.989618	0.00368727		0.279885	0.460837	0.140692		0.312688	0.284912	0.309227		0.0241306	1	0.0205632		0.0392122	1	0.0243111		0.189786	1	-0.184667		0.00302121	0.998862	0.00491955			-0.0189129	0.0186563	0.0291544	-0.0772168	-0.0118879
2149	Q14697	GANAB	Neutral alpha-glucosidase AB OS=Homo sapiens GN=GANAB PE=1 SV=3	GANAB (58)	GANAB (55)	GANAB (58;55)	Both	ER-Lumen	58	55		2.06547	0.516183	0.0902477		0.0170864	0.996367	-0.00104594		2.36088	0.403804	0.127835		3.83013	0.190849	0.308528		0.283105	1	0.0551698		0.00574823	1	0.00109671		0.670598	0.96419	-0.0432334		0.099339	1	-0.0147697			-0.038118	0.0371134	0.0819606	0.0102313	0.125864
4734	Q5HYI8	RABL3	Rab-like protein 3 OS=Homo sapiens GN=RABL3 PE=1 SV=1	RABL3 (4)	RABL3 (5)	RABL3 (4;5)	Both		4	5		0.0954163	0.798761	-0.0441111		0.201272	0.765027	0.055006		1.46578	0.339856	0.157454		1.95276	0.20113	0.307961		0.211256	1	-0.0295473		0.400225	1	-0.0726611		0.404394	0.960966	-0.0581294		0.652926	1	-0.140238			-0.081919	0.0774685	-0.182575	-0.0296557	0.134699
3149	Q16539	MAPK14	Mitogen-activated protein kinase 14 OS=Homo sapiens GN=MAPK14 PE=1 SV=3	MAPK14 (7)	MAPK14 (4)	MAPK14 (7;4)	Both		7	4		0.656969	0.217571	0.350678		0.897596	0.321047	0.252148		1.12122	0.116395	0.408476		0.208003	0.325961	0.307619		0.154227	1	0.0547725		0.0924058	1	0.0335677		0.185717	1	-0.275411		0.0190683	1	-0.0349885			0.0992022	-0.106461	0.179643	0.160705	0.291538
3964	P13674	P4HA1	Prolyl 4-hydroxylase subunit alpha-1 OS=Homo sapiens GN=P4HA1 PE=1 SV=2	P4HA1 (8)	P4HA1 (12)	P4HA1 (8;12)	Both	ER-Lumen	8	12		0.330095	0.569245	0.0965497		0.405701	0.657418	-0.0872755		0.457236	0.471521	0.126515		0.293325	0.291118	0.30739		0.0891012	1	0.0587848		0.0713735	1	-0.0226202		0.24194	1	-0.250553		0.0149871	1	0.0244655			0.00839323	-0.00843698	0.00767662	-0.152085	0.0461078
2476	Q96MH2	HEXIM2	Protein HEXIM2 OS=Homo sapiens GN=HEXIM2 PE=1 SV=1	HEXIM2 (1)	HEXIM2 (1)	HEXIM2 (1;1)	Both		1	1		0.410088	0.414659	0.163356		0.0630002	0.926203	-0.0202962		3.13967	0.123379	0.347438		3.06279	0.194971	0.307215		0.883469	1	-0.397757		0.106836	1	-0.109838		0.502443	1	-0.285699		0.0351095	1	-0.026252			-0.0327353	0.0319889	0.279454	-0.114496	0.328175
2605	P38646	HSPA9	Stress-70 protein, mitochondrial OS=Homo sapiens GN=HSPA9 PE=1 SV=2	HSPA9 (42)	HSPA9 (42)	HSPA9 (42;42)	Both	Mitochondrion-Mtx	42	42		1.14057	0.598588	0.0728532		0.0527504	0.962257	0.00857239		2.44619	0.274207	0.193216		2.33187	0.200154	0.306424		0.091511	1	0.00590844		0.564047	1	0.0197478		1.08022	1	-0.123845		0.493321	1	0.0459588			0.0387892	-0.0398353	0.0641681	0.0520424	0.202712
780	Q8NFZ8	CADM4	Cell adhesion molecule 4 OS=Homo sapiens GN=CADM4 PE=1 SV=1	CADM4 (9)	CADM4 (6)	CADM4 (9;6)	Both		9	6		0.404813	0.447633	0.147672		0.56129	0.529156	0.149716		0.77675	0.370821	0.167277		1.92901	0.215673	0.306345		0.060342	1	0.0288637		0.564751	1	-0.086315		1.53595	0.978639	0.0961129		0.18508	1	0.0505304			-0.00511539	0.00509389	0.252832	0.21886	0.212878
3175	Q9NZL9	MAT2B	Methionine adenosyltransferase 2 subunit beta OS=Homo sapiens GN=MAT2B PE=1 SV=1	MAT2B (12)	MAT2B (6)	MAT2B (12;6)	Both		12	6		0.568982	0.515844	-0.0958065		0.158973	0.754978	0.0591525		1.22533	0.278716	0.200662		1.76004	0.203948	0.306117		1.34502	1	-0.110396		1.1325	1	-0.140233		0.314206	0.966869	-0.0342234		0.519395	1	-0.122133			-0.109412	0.101634	-0.130054	-0.0543243	0.203528
909	P40227	CCT6A	T-complex protein 1 subunit zeta OS=Homo sapiens GN=CCT6A PE=1 SV=3	CCT6A (30)	CCT6A (30)	CCT6A (30;30)	Both		30	30		2.27769	0.460635	0.112218		0.0149307	0.987254	-0.00423458		0.586631	0.403438	0.153705		3.57846	0.194565	0.306034		0.126618	1	-0.0332569		0.38455	1	-0.0892269		1.1777	0.964453	-0.0836846		0.0362847	1	-0.00439996			0.00930275	-0.00935724	0.111059	-0.0837763	0.223326
5160	O15127	SCAMP2	Secretory carrier-associated membrane protein 2 OS=Homo sapiens GN=SCAMP2 PE=1 SV=2	SCAMP2 (2)	SCAMP2 (2)	SCAMP2 (2;2)	Both	Endosome	2	2		0.670043	0.465528	0.114994		0.468865	0.6233	0.0875247		1.53158	0.185494	0.285949		1.67159	0.205619	0.305938		0.051809	1	-0.012487		0.246997	1	-0.0705652		0.067775	0.985565	-0.0204814		0.141628	1	0.0286465			0.167669	-0.189621	0.124047	0.0480646	0.276688
4012	P09874	PARP1	Poly [ADP-ribose] polymerase 1 OS=Homo sapiens GN=PARP1 PE=1 SV=4	PARP1 (27)	PARP1 (33)	PARP1 (27;33)	Both		27	33		0.0374242	0.965226	-0.0064738		0.127435	0.897063	-0.023665		0.317941	0.204386	-0.392907		0.450851	0.253085	0.305875		0.218628	1	0.299735		0.104412	1	0.179365		0.0365631	0.982752	-0.0254868		0.034957	1	-0.0302221			0.109142	-0.118002	0.0267576	-0.0733991	-0.0230608
688	P41223	BUD31	Protein BUD31 homolog OS=Homo sapiens GN=BUD31 PE=1 SV=2	BUD31 (7)	BUD31 (6)	BUD31 (7;6)	Both		7	6		0.769583	0.444785	-0.122617		0.281692	0.574699	0.130049		1.24039	0.275158	0.201302		0.766779	0.225049	0.305819		0.261402	1	0.0513489		0.00879502	1	-0.00145935		0.0612966	0.980219	-0.0253208		0.0401007	1	0.0220257			-0.169434	0.151519	-0.157101	0.268509	0.159336
6413	P14927	UQCRB	Cytochrome b-c1 complex subunit 7 OS=Homo sapiens GN=UQCRB PE=1 SV=2	UQCRB (4)	UQCRB (5)	UQCRB (4;5)	Both	Mitochondrion-IM	4	5		0.15538	0.804178	-0.0361063		0.229693	0.642881	0.0918413		0.669941	0.362159	-0.154238		1.55897	0.205755	0.305463		0.534097	1	0.116204		0.157293	1	-0.0481558		0.0233551	0.998128	0.00388077		0.646965	1	-0.117527			-0.0950231	0.0890945	-0.0785731	-0.0341804	-0.225331
3852	A0A087WSV8	NUCB2	Nucleobindin 2, isoform CRA_b OS=Homo sapiens GN=NUCB2 PE=1 SV=1	NUCB2 (13)	NUCB2 (10)	NUCB2 (13;10)	Both		13	10		0.35939	0.748225	0.0447829		0.746115	0.606676	-0.092397		1.34204	0.304415	0.180009		1.94254	0.202367	0.305264		0.751401	1	-0.114977		0.00518354	1	0.000853553		0.809733	1	-0.207631		0.609475	1	0.0966098			0.0870761	-0.0926106	0.0593742	-0.0651815	0.214391
4457	Q96BP3	PPWD1	Peptidylprolyl isomerase domain and WD repeat-containing protein 1 OS=Homo sapiens GN=PPWD1 PE=1 SV=1	PPWD1 (6)	PPWD1 (7)	PPWD1 (6;7)	Both		6	7		0.585694	0.411105	-0.142281		0.0818601	0.896195	0.0243649		0.438945	0.490037	0.10721		1.00935	0.216475	0.304433		0.122075	1	0.0442925		0.175644	1	-0.0544795		0.0478151	0.987591	-0.0184559		0.231366	1	-0.0695861			-0.220751	0.191299	-0.193308	0.0462962	0.0733396
81	Q96CM8	ACSF2	Acyl-CoA synthetase family member 2, mitochondrial OS=Homo sapiens GN=ACSF2 PE=1 SV=2	ACSF2 (3)	ACSF2 (6)	ACSF2 (3;6)	Both		3	6		0.447402	0.765597	0.0476361		0.182428	0.839645	0.0402761		0.740733	0.193407	0.328141		0.752288	0.233683	0.304393		0.234128	1	0.0894727		0.0824287	1	-0.0365717		0.0824553	0.978233	-0.025447		0.367632	1	-0.12009			-0.00738212	0.00733992	0.0778541	0.107659	0.424645
2658	Q9NZI8	IGF2BP1	Insulin-like growth factor 2 mRNA-binding protein 1 OS=Homo sapiens GN=IGF2BP1 PE=1 SV=2	IGF2BP1 (55)	IGF2BP1 (47)	IGF2BP1 (55;47)	Both		55	47		1.19773	0.452919	-0.117569		0.0232795	0.990087	0.00296744		0.86183	0.563787	0.0838945		0.985189	0.219453	0.304169		0.503882	1	0.036172		1.32006	1	-0.0356283		0.257508	0.961823	-0.0663085		0.136153	1	-0.0590502			-0.0864667	0.0815259	-0.108381	0.000546973	0.0772819
2365	P00390	GSR	Glutathione reductase, mitochondrial OS=Homo sapiens GN=GSR PE=1 SV=2	GSR (8)	GSR (10)	GSR (8;10)	Both	Mitochondrion-Mtx	8	10		0.203201	0.684888	0.0678252		0.161842	0.704743	0.0803888		0.412864	0.406393	0.159979		0.449325	0.258628	0.304116		0.19155	1	-0.0841754		0.28399	1	-0.10536		0.168389	0.971083	-0.105433		0.0983005	1	-0.0782332			0.0110576	-0.0111361	-0.0346369	-0.0711328	0.0473208
906	P49368	CCT3	T-complex protein 1 subunit gamma OS=Homo sapiens GN=CCT3 PE=1 SV=4	CCT3 (66)	CCT3 (59)	CCT3 (66;59)	Both		66	59		0.408487	0.796284	0.0406675		0.625731	0.82348	0.0396854		0.778938	0.373098	0.165089		1.08176	0.226994	0.304096		0.11098	1	0.0214692		0.571002	1	-0.0991538		0.910489	1	-0.160594		0.157583	1	-0.042324			0.000441584	-0.000441633	0.0108219	0.0580998	0.211879
3626	Q92542	NCSTN	Nicastrin OS=Homo sapiens GN=NCSTN PE=1 SV=2	NCSTN (11)	NCSTN (11)	NCSTN (11;11)	Both		11	11		0.0130913	0.986092	-0.00244991		0.150354	0.820491	-0.0428521		0.0933902	0.825267	0.0406994		0.68117	0.231793	0.303378		0.00812614	1	0.00374275		0.342413	1	-0.145534		0.432195	1	-0.182823		0.275752	1	-0.107581			-0.0540446	0.0520607	-0.0466427	-0.129464	0.167127
1926	Q86VR2	FAM134C	Protein FAM134C OS=Homo sapiens GN=FAM134C PE=1 SV=1	FAM134C (4)	FAM134C (4)	FAM134C (4;4)	Both		4	4		0.867049	0.552034	0.0860337		1.18901	0.657189	0.0736997		1.82766	0.406282	0.127995		1.27195	0.217096	0.302957		0.906165	1	-0.0383696		0.125376	1	-0.027654		0.477658	0.965348	0.0785014		0.396667	1	0.0722224			-0.0506496	0.0489009	0.115664	0.0598872	0.123626
1121	Q9NRP2	CMC2	COX assembly mitochondrial protein 2 homolog OS=Homo sapiens GN=CMC2 PE=1 SV=1	CMC2 (2)	CMC2 (2)	CMC2 (2;2)	Both		2	2		0.798336	0.431536	-0.129534		1.84165	0.319365	0.239949		0.185731	0.854913	0.0271973		1.85308	0.205861	0.302698		0.709236	1	0.132459		0.0602604	1	-0.0206424		0.374453	0.960914	-0.0616603		0.161548	1	-0.0430797			-0.114357	0.105889	-0.180851	0.253454	0.0474162
4318	Q9NVS9	PNPO	Pyridoxine-5'-phosphate oxidase OS=Homo sapiens GN=PNPO PE=1 SV=1	PNPO (4)	PNPO (1)	PNPO (4;1)	Both		4	1		0.581123	0.213181	-0.363935		0.543568	0.285476	0.335475		0.800972	0.114437	-0.44263		0.437063	0.238337	0.302549		0.206896	1	0.277355		0.180685	1	-0.128034		0.110725	0.972786	0.123328		0.0775123	1	0.052839			-0.567202	0.405851	-0.585081	0.120777	-0.634792
1932	Q96A26	FAM162A	Protein FAM162A OS=Homo sapiens GN=FAM162A PE=1 SV=2	FAM162A (9)	FAM162A (12)	FAM162A (9;12)	Both	Mitochondrion-IM	9	12		0.623261	0.737771	0.0477631		0.690902	0.689345	-0.0701835		0.754764	0.18255	0.345633		0.515236	0.251465	0.302436		0.178699	1	-0.0613791		0.219632	1	-0.0766839		0.152368	0.968975	-0.0797488		0.24518	1	-0.150911			-0.0361531	0.0352471	0.0712684	-0.100733	0.448263
6137	O14773	TPP1	Tripeptidyl-peptidase 1 OS=Homo sapiens GN=TPP1 PE=1 SV=2	TPP1 (5)	TPP1 (4)	TPP1 (5;4)	Both	Lysosome	5	4		0.152773	0.571887	-0.106581		0.054001	0.929228	-0.0184606		0.0916033	0.849047	0.0337429		0.81565	0.228568	0.301754		0.229195	1	0.080398		0.0497938	1	0.0184306		0.102998	0.969821	0.0343369		0.16776	1	0.0548027			-0.121309	0.111827	0.103021	0.0749545	0.138442
5298	Q9BWJ5	SF3B5	Splicing factor 3B subunit 5 OS=Homo sapiens GN=SF3B5 PE=1 SV=1	SF3B5 (5)	SF3B5 (2)	SF3B5 (5;2)	Both		5	2		0.0339932	0.946177	-0.011885		0.198801	0.692808	0.0795955		1.80885	0.155011	0.318011		2.62661	0.20031	0.301513		0.939942	1	0.168461		0.319355	1	0.125664		0.331235	0.966748	-0.0847059		0.461951	1	0.120426			0.0713763	-0.0750433	-0.11147	-0.0443826	0.357564
5094	Q16799	RTN1	Reticulon-1 OS=Homo sapiens GN=RTN1 PE=1 SV=1	RTN1 (22)	RTN1 (20)	RTN1 (22;20)	Both	ER_high_curvature	22	20		0.890523	0.583659	-0.0760787		1.99992	0.37418	0.191159		1.65797	0.253752	-0.215994		2.47606	0.20301	0.301456		1.12458	1	-0.202686		0.326571	1	0.0483374		1.32437	1	-0.22319		0.321789	1	0.0543911			-0.0685261	0.0653777	-0.0622759	0.16962	-0.252423
506	O75947	ATP5H	ATP synthase subunit d, mitochondrial OS=Homo sapiens GN=ATP5H PE=1 SV=3	ATP5H (12)	ATP5H (12)	ATP5H (12;12)	Both	Mitochondrion-IM	12	12		0.656561	0.437016	-0.129053		1.05336	0.417519	0.175229		0.531002	0.514649	-0.0978016		1.76565	0.206913	0.30138		0.700867	1	0.129531		0.113488	1	0.0202766		0.116884	0.984902	-0.0187051		0.375709	1	-0.0743188			-0.121519	0.112005	-0.19188	0.219238	-0.0487764
5526	P62306	SNRPF	Small nuclear ribonucleoprotein F OS=Homo sapiens GN=SNRPF PE=1 SV=1	SNRPF (3)	SNRPF (2)	SNRPF (3;2)	Both		3	2		0.705264	0.336643	0.194188		0.594424	0.323675	0.29543		0.401341	0.27345	0.266243		0.194689	0.340633	0.301087		0.141908	1	0.0913667		0.134836	1	0.0889046		0.0187982	0.982322	0.0316182		0.148783	1	-0.242927			-0.0607326	0.0582426	0.117833	0.16197	0.0710479
2522	P82970	HMGN5	High mobility group nucleosome-binding domain-containing protein 5 OS=Homo sapiens GN=HMGN5 PE=1 SV=1	HMGN5 (9)	HMGN5 (4)	HMGN5 (9;4)	Both		9	4		0.592085	0.648102	0.0692197		0.911891	0.645711	-0.0834238		1.32759	0.184229	0.309964		0.810694	0.233529	0.300442		0.00446633	0.998185	0.000589818		0.62502	1	-0.0847036		0.138933	0.968353	-0.0361551		0.156743	1	0.0687224			0.0302445	-0.0308725	0.102731	-0.108237	0.273509
785	P22676	CALB2	Calretinin OS=Homo sapiens GN=CALB2 PE=2 SV=2	CALB2 (11)	CALB2 (7)	CALB2 (11;7)	Both		11	7		0.0918959	0.921465	0.0159027		1.06162	0.606859	-0.0901781		1.58873	0.227953	0.239229		2.59139	0.201286	0.300315		0.279088	1	0.0924736		0.479598	1	-0.0610614		0.412436	0.963109	-0.0439692		1.1419	1	-0.118367			-0.00738221	0.00733992	0.0628853	-0.11403	0.276383
2015	P14324	FDPS	Farnesyl pyrophosphate synthase OS=Homo sapiens GN=FDPS PE=1 SV=4	FDPS (11)	FDPS (12)	FDPS (11;12)	Both		11	12		2.33697	0.262061	0.208603		0.89282	0.34986	0.236512		0.351591	0.396293	0.169051		2.63744	0.202767	0.300214		0.0300989	1	0.0175267		0.22334	1	-0.123586		0.881287	1	-0.15973		0.13579	1	0.0158378			0.070827	-0.0744361	0.18861	0.302779	0.31284
6773	O95780	ZNF682	Zinc finger protein 682 OS=Homo sapiens GN=ZNF682 PE=2 SV=1	ZNF682 (1)	ZNF682 (1)	ZNF682 (1;1)	Both		1	1		0.13106	0.745028	-0.0563242		0.37664	0.440546	-0.205856		0.87682	0.344004	0.171693		0.696815	0.236956	0.299999		0.289462	1	-0.0537422		0.34469	1	0.107581		0.0632822	0.976271	0.0262606		0.103783	1	-0.0395833			0.0327357	-0.0334745	-0.186791	-0.368324	0.119264
4886	P61586	RHOA	Transforming protein RhoA OS=Homo sapiens GN=RHOA PE=1 SV=1	RHOA (2)	RHOA (3)	RHOA (2;3)	Both	Plasma membrane	2	3		0.0355997	0.957216	0.0090625		0.84991	0.34768	0.247617		0.539508	0.360849	0.179136		0.676017	0.240457	0.299952		0.171738	1	0.0878975		0.246162	1	-0.0725125		0.377285	1	-0.166551		0.198014	1	-0.0717619			0.0233121	-0.0236798	-0.0637712	0.185015	0.268533
216	Q02252	ALDH6A1	Methylmalonate-semialdehyde dehydrogenase [acylating], mitochondrial OS=Homo sapiens GN=ALDH6A1 PE=1 SV=2	ALDH6A1 (7)	ALDH6A1 (13)	ALDH6A1 (7;13)	Both		7	13		1.07333	0.491253	-0.101854		0.536293	0.792572	0.0435968		1.568	0.389049	0.135818		2.83046	0.200561	0.299822		0.271681	1	0.0543161		0.372125	1	-0.0361131		0.600088	0.96555	-0.0364456		0.570837	1	-0.0563112			-0.00572866	0.00570232	-0.0761811	0.0476397	0.130248
2077	Q9Y2H6	FNDC3A	Fibronectin type-III domain-containing protein 3A OS=Homo sapiens GN=FNDC3A PE=1 SV=4	FNDC3A (10)	FNDC3A (14)	FNDC3A (10;14)	Both	ER-Lumen	10	14		0.581666	0.652302	0.0689397		0.0936921	0.938911	0.0159291		1.0505	0.552392	0.0906448		1.77429	0.215611	0.299413		0.124344	1	0.0439339		0.0608339	1	0.00447052		0.0148141	0.994759	-0.00735921		1.49076	1	-0.237034			-0.018507	0.018261	0.0352972	-0.0346204	0.0690572
5619	Q13501	SQSTM1	Sequestosome-1 OS=Homo sapiens GN=SQSTM1 PE=1 SV=1	SQSTM1 (4)	SQSTM1 (1)	SQSTM1 (4;1)	Both	Plasma membrane	4	1		0.323759	0.507618	0.120477		1.29748	0.652798	0.0759357		1.19567	0.0846056	0.536709		1.47237	0.218779	0.298676		0.637862	1	0.173624		0.232334	1	-0.051068		1.24932	1	0.348465		0.75269	1	0.102676			-0.00780371	0.00775685	0.00814477	0.0587875	0.470682
3168	Q7KZI7	MARK2	Serine/threonine-protein kinase MARK2 OS=Homo sapiens GN=MARK2 PE=1 SV=2	MARK2 (3)	MARK2 (5)	MARK2 (3;5)	Both		3	5		0.325299	0.693002	-0.0552217		0.281919	0.773421	0.0488817		0.0360098	0.881458	0.0310682		0.330308	0.285356	0.298481		0.0119405	1	-0.0105969		0.12727	1	-0.112714		0.182069	0.993724	-0.163839		0.00819232	1	0.0105774			0.119493	-0.130205	-0.0621501	0.0355843	0.271421
1911	Q8IWE2	FAM114A1	Protein NOXP20 OS=Homo sapiens GN=FAM114A1 PE=1 SV=2	FAM114A1 (3)	FAM114A1 (2)	FAM114A1 (3;2)	Both		3	2		0.055149	0.929562	-0.0139382		1.30462	0.44855	-0.156335		0.259908	0.548491	0.104152		1.25749	0.216129	0.298017		0.235038	1	-0.094871		0.330672	1	-0.137198		0.406818	1	-0.166471		0.768353	1	-0.200767			-0.125782	0.115619	0.0499703	-0.166411	-0.0223167
1515	Q5HYB6	DKFZp686J1372	Epididymis luminal protein 189 OS=Homo sapiens GN=DKFZp686J1372 PE=1 SV=1	DKFZp686J1372 (18)	DKFZp686J1372 (18)	DKFZp686J1372 (18;18)	Both		18	18		0.797178	0.393444	0.16147		0.231529	0.773665	-0.0557664		1.8901	0.291341	0.188925		1.05741	0.227071	0.297825		0.46941	1	0.0708433		0.181867	1	-0.0385943		0.276589	0.961632	-0.0636667		0.276209	1	0.258602			-0.000470965	0.000470468	0.110516	0.0178907	0.210705
853	P45973	CBX5	Chromobox protein homolog 5 OS=Homo sapiens GN=CBX5 PE=1 SV=1	CBX5 (10)	CBX5 (9)	CBX5 (10;9)	Both		10	9		2.41424	0.287835	0.193397		0.320153	0.652776	-0.0906556		0.28015	0.462905	0.13926		1.79866	0.211829	0.297768		0.102091	1	-0.0519091		0.298552	1	-0.14808		1.25131	1	-0.207668		0.0633831	1	-0.0212823			0.056995	-0.0593013	0.193724	-0.177843	0.290098
2743	Q6UXK2	ISLR2	Immunoglobulin superfamily containing leucine-rich repeat protein 2 OS=Homo sapiens GN=ISLR2 PE=2 SV=1	ISLR2 (14)	ISLR2 (7)	ISLR2 (14;7)	Both		14	7		0.582755	0.387595	0.172499		1.23024	0.285558	0.302499		0.404626	0.842731	-0.0310639		1.72488	0.215979	0.297704		0.456384	1	-0.0408072		0.32316	1	-0.0251971		0.0590195	0.980903	-0.0252656		0.046489	1	0.00991013			0.0353921	-0.0362591	0.250677	0.26007	-0.0551759
3416	Q96EL3	MRPL53	39S ribosomal protein L53, mitochondrial OS=Homo sapiens GN=MRPL53 PE=1 SV=1	MRPL53 (2)	MRPL53 (2)	MRPL53 (2;2)	Both	Mitochondrion-Mtx	2	2		0.933018	0.453551	-0.120425		0.803619	0.680337	0.0673942		0.122041	0.938896	0.0116685		2.14163	0.207504	0.297651		0.367926	1	0.118129		0.0448691	1	0.0241763		0.978048	1	-0.180547		0.71775	1	-0.247038			-0.0534435	0.0515024	-0.160725	0.047905	0.00992922
4209	Q9Y2B2	PIGL	N-acetylglucosaminyl-phosphatidylinositol de-N-acetylase OS=Homo sapiens GN=PIGL PE=1 SV=1	PIGL (1)	PIGL (1)	PIGL (1;1)	Both		1	1		0.192474	0.76936	0.0426676		0.323382	0.682659	0.0701723		0.987455	0.186992	0.298608		1.45542	0.211227	0.297447		0.148334	1	0.0447231		0.172653	1	-0.0523318		0.832045	1	0.193468		0.318887	1	0.0510138			-0.0960693	0.0900142	0.0530422	0.0975072	0.382696
3406	Q8IXM3	MRPL41	39S ribosomal protein L41, mitochondrial OS=Homo sapiens GN=MRPL41 PE=1 SV=1	MRPL41 (3)	MRPL41 (2)	MRPL41 (3;2)	Both	Mitochondrion-Mtx	3	2		0.224991	0.835625	0.0333138		0.782201	0.58369	-0.116153		0.876891	0.567086	0.0894985		1.57414	0.218975	0.297358		0.151375	1	-0.0350151		0.0464253	1	0.0128346		0.420698	0.963176	-0.0810289		0.225945	1	0.0263739			-0.000354672	0.000354241	0.0787206	-0.152614	0.115406
1433	Q13838	DDX39B	Spliceosome RNA helicase DDX39B OS=Homo sapiens GN=DDX39B PE=1 SV=1	DDX39B (43)	DDX39B (43)	DDX39B (43;43)	Both		43	43		0.645503	0.683981	-0.0552471		0.594925	0.757137	0.050779		1.43442	0.416862	0.123573		1.1064	0.219729	0.297316		0.0383522	1	0.00624167		0.849214	1	-0.0959034		0.339057	0.964561	-0.0807117		0.346043	1	-0.0735149			-0.0796706	0.0754535	-0.06718	0.045816	0.107176
336	Q8IUX4	APOBEC3F	DNA dC->dU-editing enzyme APOBEC-3F OS=Homo sapiens GN=APOBEC3F PE=1 SV=3	APOBEC3F (1)	APOBEC3F (3)	APOBEC3F (1;3)	Both		1	3		0.93082	0.491835	0.109172		0.0554121	0.959064	-0.00973971		0.835137	0.135125	0.414687		0.908245	0.229111	0.296353		0.260661	1	-0.0927282		0.250502	1	-0.084773		0.307763	0.962641	0.0681262		0.155854	1	-0.0351394			0.0431899	-0.0444942	0.140556	-0.060408	0.311272
3923	O14841	OPLAH	5-oxoprolinase OS=Homo sapiens GN=OPLAH PE=1 SV=3	OPLAH (2)	OPLAH (1)	OPLAH (2;1)	Both		2	1		0.384027	0.595972	0.0854836		0.106696	0.81512	-0.0500746		1.22812	0.15703	0.341882		1.42109	0.217957	0.296154		0.579432	1	-0.110814		0.665887	1	-0.12514		0.251337	0.963969	0.0665065		0.0987779	1	0.0608576			-0.0232143	0.0228322	0.0166896	0.0895885	0.395841
6128	P60174	TPI1	Triosephosphate isomerase OS=Homo sapiens GN=TPI1 PE=1 SV=3	TPI1 (43)	TPI1 (44)	TPI1 (43;44)	Both		43	44		0.516449	0.591785	0.0784121		1.78863	0.251412	0.330723		0.679804	0.216665	0.293406		0.461746	0.261959	0.29607		0.064489	1	-0.0281306		0.491185	1	-0.207081		0.308387	1	-0.188975		0.0396954	1	-0.0312928			-0.0991028	0.0926736	0.0301965	0.28436	0.176771
206	Q13740	ALCAM	CD166 antigen OS=Homo sapiens GN=ALCAM PE=1 SV=2	ALCAM (8)	ALCAM (9)	ALCAM (8;9)	Both		8	9		0.250167	0.421351	0.170167		1.08715	0.492822	0.141938		0.130267	0.829419	-0.035553		1.604	0.211213	0.295842		0.198653	1	-0.0977672		0.0641558	1	-0.0246162		0.49205	1	-0.158694		0.0594933	1	0.0132097			-0.117431	0.108522	-0.0425151	0.155947	-0.115164
6404	Q9C0B0	UNK	RING finger protein unkempt homolog OS=Homo sapiens GN=UNK PE=1 SV=2	UNK (7)	UNK (3)	UNK (7;3)	Both		7	3		0.22158	0.418336	-0.168542		0.198168	0.606565	0.106828		0.127884	0.682176	-0.0678377		0.743744	0.22461	0.295821		0.10806	1	0.0752245		0.122784	1	-0.119029		0.144364	0.96196	0.0630291		0.381663	1	-0.146834			-0.00755871	0.00751461	0.0443406	-0.0598962	0.0505578
4349	P19388	POLR2E	DNA-directed RNA polymerases I, II, and III subunit RPABC1 OS=Homo sapiens GN=POLR2E PE=1 SV=4	POLR2E (5)	POLR2E (1)	POLR2E (5;1)	Both		5	1		0.562349	0.24551	-0.29888		1.38797	0.359138	-0.204278		0.0994783	0.810986	0.0425188		0.903463	0.226677	0.295649		0.507501	1	-0.234815		0.353348	1	-0.148214		0.790074	1	-0.292834		0.0854641	1	0.0965002			-0.0833057	0.0787084	-0.149302	-0.168112	-0.0854811
2568	Q96IR7	HPDL	4-hydroxyphenylpyruvate dioxygenase-like protein OS=Homo sapiens GN=HPDL PE=1 SV=1	HPDL (2)	HPDL (5)	HPDL (2;5)	Both		2	5		0.668409	0.308103	0.221356		0.529357	0.750922	-0.0562984		1.81148	0.517477	0.0912229		1.74337	0.215758	0.295563		1.24613	1	0.106239		0.235918	1	0.00993307		0.151548	0.962995	0.0501022		0.0921983	1	-0.0199567			-0.0445957	0.0432314	0.303757	-0.0893757	0.0781997
5194	O75056	SDC3	Syndecan-3 OS=Homo sapiens GN=SDC3 PE=1 SV=2	SDC3 (1)	SDC3 (1)	SDC3 (1;1)	Both		1	1		1.23581	0.226832	0.285697		1.85629	0.207163	0.401742		0.419043	0.203196	-0.350667		0.987527	0.220311	0.29552		0.0532162	1	0.071692		0.198368	1	-0.163579		0.967784	1	-0.459158		0.0191697	1	0.0262968			-0.0278896	0.0273435	0.215182	0.360233	-0.610635
6488	P55072	VCP	Transitional endoplasmic reticulum ATPase OS=Homo sapiens GN=VCP PE=1 SV=4	VCP (75)	VCP (63)	VCP (75;63)	Both		75	63		1.96276	0.493831	0.0997214		2.06913	0.587089	0.0982895		2.50094	0.336718	0.157116		0.992701	0.228671	0.295474		0.19346	1	0.0163166		0.168813	1	-0.025757		0.510316	0.974998	-0.107838		0.165256	1	0.0658576			0.0153953	-0.0155514	0.0966577	0.0900803	0.155659
4718	P51149	RAB7A	Ras-related protein Rab-7a OS=Homo sapiens GN=RAB7A PE=1 SV=1	RAB7A (15)	RAB7A (17)	RAB7A (15;17)	Both		15	17		0.00560769	0.994927	0.00105871		1.24372	0.634216	0.0806518		0.114876	0.884552	-0.0245148		1.11159	0.224522	0.294718		0.210992	1	0.0658116		0.200006	1	-0.0619486		0.450549	0.967766	-0.0882697		0.12045	1	0.0456542			-0.0344395	0.0336154	0.0501881	0.0888243	0.0376993
5538	Q96RF0	SNX18	Sorting nexin-18 OS=Homo sapiens GN=SNX18 PE=1 SV=2	SNX18 (11)	SNX18 (9)	SNX18 (11;9)	Both		11	9		0.752135	0.452367	0.136457		3.00195	0.65755	-0.0722508		1.15006	0.187901	0.315729		0.861063	0.236774	0.294151		0.0629359	1	0.0178618		0.461069	1	-0.0636486		0.135823	0.972612	-0.0296431		0.47427	1	-0.107077			-0.0158938	0.0157108	0.177097	-0.0769448	0.354373
4751	P11234	RALB	Ras-related protein Ral-B OS=Homo sapiens GN=RALB PE=1 SV=1	RALB (2)	RALB (3)	RALB (2;3)	Both	Plasma membrane	2	3		1.2158	0.285877	-0.203176		0.994887	0.350439	0.218314		0.556055	0.497842	-0.101374		1.11291	0.218991	0.293791		0.743536	1	-0.236938		0.321498	1	-0.129251		0.754194	1	-0.233195		0.211889	1	0.177858			-0.180491	0.160304	-0.218224	0.147919	-0.146915
6116	Q5JU69	TOR2A	Torsin-2A OS=Homo sapiens GN=TOR2A PE=2 SV=1	TOR2A (1)	TOR2A (2)	TOR2A (1;2)	Both	ER-Membrane	1	2		0.119434	0.8375	-0.0346742		0.125482	0.982004	-0.00435884		0.138059	0.549506	0.122		0.120903	0.410326	0.293492		0.327411	1	-0.290581		0.452246	1	-0.404496		0.160374	1	-0.385893		0.0409646	1	0.150861			-0.0169681	0.0167602	-0.122141	0.00196614	0.389486
5962	P62072	TIMM10	Mitochondrial import inner membrane translocase subunit Tim10 OS=Homo sapiens GN=TIMM10 PE=1 SV=1	TIMM10 (3)	TIMM10 (3)	TIMM10 (3;3)	Both	Mitochondrion-Mtx	3	3		0.28344	0.364247	-0.212745		0.384724	0.345209	0.293802		0.49513	0.576732	0.0906684		0.424056	0.274054	0.293273		0.439531	1	0.320125		0.199832	1	0.0883763		0.230314	1	-0.155883		0.131907	1	-0.0984443			0.0457555	-0.047224	-0.440918	0.516771	0.14505
2554	Q9UJC3	HOOK1	Protein Hook homolog 1 OS=Homo sapiens GN=HOOK1 PE=1 SV=2	HOOK1 (2)	HOOK1 (1)	HOOK1 (2;1)	Both		2	1		0.515646	0.667789	-0.0584128		1.34968	0.47394	-0.147803		0.189049	0.651668	0.079261		2.27402	0.208719	0.293185		0.327323	1	-0.137038		0.0895967	1	0.043261		0.58773	1	-0.353424		1.60915	1	-0.13871			0.0859757	-0.0913661	-0.0411869	-0.140548	0.205434
5104	Q96C34	RUNDC1	RUN domain-containing protein 1 OS=Homo sapiens GN=RUNDC1 PE=1 SV=3	RUNDC1 (5)	RUNDC1 (1)	RUNDC1 (5;1)	Both		5	1		0.430245	0.353158	0.193351		0.813028	0.490367	-0.144268		0.390233	0.648393	0.0681262		1.04511	0.219688	0.29289		0.386476	1	-0.0473691		0.381297	1	-0.2333		0.335224	0.969906	-0.0907441		0.197092	1	-0.0916188			0.06552	-0.0685934	0.327676	-0.190903	0.0665396
4431	P62714	PPP2CB	Serine/threonine-protein phosphatase 2A catalytic subunit beta isoform OS=Homo sapiens GN=PPP2CB PE=1 SV=1	PPP2CB (19)	PPP2CB (11)	PPP2CB (19;11)	Both		19	11		0.273687	0.586094	-0.0925673		0.699828	0.288314	0.35246		0.175271	0.676437	0.0751508		0.236019	0.328741	0.292737		0.128432	1	0.0633656		0.313799	1	-0.139193		0.259673	1	-0.31925		0.17105	1	-0.219602			0.0559854	-0.0582085	-0.196817	0.230834	-0.0563543
5806	Q9H2B2	SYT4	Synaptotagmin-4 OS=Homo sapiens GN=SYT4 PE=1 SV=1	SYT4 (5)	SYT4 (4)	SYT4 (5;4)	Both		5	4		1.40438	0.200073	-0.341548		0.689877	0.619683	0.0950205		0.691465	0.230245	0.281025		3.31431	0.204374	0.292524		0.936055	1	-0.42271		0.0474845	1	0.0349037		0.700568	1	-0.262312		0.276004	1	0.093503			0.0342504	-0.0350609	-0.304586	0.132524	0.377313
4631	Q9Y3E5	PTRH2	Peptidyl-tRNA hydrolase 2, mitochondrial OS=Homo sapiens GN=PTRH2 PE=1 SV=1	PTRH2 (7)	PTRH2 (6)	PTRH2 (7;6)	Both		7	6		0.629731	0.498477	0.115799		1.34573	0.809025	0.0394421		0.388287	0.562002	0.100155		1.67612	0.220473	0.292489		0.213773	1	0.0529096		0.26844	1	-0.0667413		0.28695	0.984941	-0.0210326		0.616462	1	-0.0568143			-0.0229498	0.0225763	0.0683527	0.0475432	0.0243518
3615	Q9NZQ3	NCKIPSD	NCK-interacting protein with SH3 domain OS=Homo sapiens GN=NCKIPSD PE=1 SV=1	NCKIPSD (3)	NCKIPSD (4)	NCKIPSD (3;4)	Both		3	4		0.0264615	0.946373	0.0107683		0.393222	0.556235	0.12289		0.187846	0.628761	-0.076709		0.858131	0.222	0.292269		0.383156	1	0.146241		0.0124201	1	0.00717605		0.466016	1	0.18268		0.00934518	0.999877	-0.00436556			-0.298549	0.247091	-0.0723445	0.167583	-0.190655
1973	Q52LJ0	FAM98B	Protein FAM98B OS=Homo sapiens GN=FAM98B PE=1 SV=1	FAM98B (12)	FAM98B (12)	FAM98B (12;12)	Both		12	12		2.39042	0.413257	-0.130153		0.428468	0.73867	-0.0608353		1.20653	0.522517	0.0938881		3.68399	0.202355	0.292053		0.175778	1	0.0128174		0.380914	1	-0.0659819		0.667754	1	-0.143894		1.36808	1	-0.0751179			-0.0424969	0.0412551	-0.142472	-0.0177358	0.115598
6783	Q9UHR6	ZNHIT2	Zinc finger HIT domain-containing protein 2 OS=Homo sapiens GN=ZNHIT2 PE=1 SV=1	ZNHIT2 (1)	ZNHIT2 (1)	ZNHIT2 (1;1)	Both		1	1		0.0713431	0.922663	0.016751		0.762425	0.416572	-0.196307		2.87459	0.210841	0.241452		0.544791	0.255842	0.291865		0.705464	1	0.0825623		0.293114	1	0.0666161		0.129838	0.963707	0.0636549		0.212081	1	-0.115969			0.0526055	-0.0545614	-0.0520234	-0.261415	0.257847
1293	Q9H0L4	CSTF2T	Cleavage stimulation factor subunit 2 tau variant OS=Homo sapiens GN=CSTF2T PE=1 SV=1	CSTF2T (15)	CSTF2T (13)	CSTF2T (15;13)	Both		15	13		0.423837	0.812437	-0.0329888		1.60783	0.5145	0.129536		2.29266	0.265084	0.201063		2.73265	0.207264	0.291577		0.33299	1	0.0959047		0.863217	1	-0.0771607		0.634426	0.973206	0.0246905		0.761113	1	-0.0865576			-0.0441674	0.0428286	-0.0320831	0.122256	0.213419
1907	Q9BTL3	FAM103A1	RNMT-activating mini protein OS=Homo sapiens GN=FAM103A1 PE=1 SV=1	FAM103A1 (7)	FAM103A1 (1)	FAM103A1 (7;1)	Both		7	1		0.232374	0.863769	0.0264321		0.0689665	0.928438	-0.0193235		0.047495	0.971447	0.00654542		1.17829	0.228065	0.290918		0.0763002	1	-0.0453465		0.0347437	1	0.0290332		0.548713	1	-0.179189		0.0526974	1	0.0122418			-0.0292733	0.028673	-0.00874745	-0.101551	0.045015
3866	O95989	NUDT3	Diphosphoinositol polyphosphate phosphohydrolase 1 OS=Homo sapiens GN=NUDT3 PE=1 SV=1	NUDT3 (10)	NUDT3 (8)	NUDT3 (10;8)	Both		10	8		0.0889367	0.901443	0.0206195		0.235094	0.756022	-0.058527		0.0123084	0.962269	0.010851		0.474247	0.266637	0.290769		0.164503	1	-0.133111		0.29479	1	-0.24077		0.585937	1	-0.346131		0.203538	1	0.128277			-0.0358301	0.0349398	-0.0471872	-0.13629	0.256305
703	Q9UKR5	C14orf1	Probable ergosterol biosynthetic protein 28 OS=Homo sapiens GN=C14orf1 PE=1 SV=1	C14orf1 (3)	C14orf1 (4)	C14orf1 (3;4)	Both		3	4		0.480251	0.386441	0.163512		2.02782	0.219714	0.438946		0.430532	0.419638	-0.1383		0.462496	0.259196	0.290673		0.054308	1	-0.0200994		0.0531134	1	-0.0294388		0.349502	1	0.217932		0.201146	1	0.135383			-0.129178	0.118484	0.262941	0.450977	-0.0462182
2827	Q92945	KHSRP	Far upstream element-binding protein 2 OS=Homo sapiens GN=KHSRP PE=1 SV=4	KHSRP (37)	KHSRP (32)	KHSRP (37;32)	Both		37	32		0.396938	0.796718	-0.0377798		0.867355	0.682671	-0.0687679		1.00282	0.345048	0.169241		0.583372	0.253682	0.290651		0.0419203	1	-0.0107329		0.295881	1	-0.064758		0.344769	1	-0.149917		0.102848	1	0.0821538			-0.0396848	0.038598	-0.00863317	-0.0933119	0.12798
2117	P06241	FYN	Tyrosine-protein kinase Fyn OS=Homo sapiens GN=FYN PE=1 SV=3	FYN (9)	FYN (8)	FYN (9;8)	Both	Plasma membrane	9	8		2.06417	0.293935	-0.189318		0.227303	0.546502	0.161326		0.134806	0.592856	0.105672		0.322859	0.298404	0.290319		0.277716	1	-0.213701		0.2697	1	-0.207824		0.420356	1	-0.38813		0.174577	1	-0.16228			-0.0484004	0.0468	-0.212952	-0.0566717	-0.132257
4	Q8N5Z0	AADAT	Kynurenine/alpha-aminoadipate aminotransferase, mitochondrial OS=Homo sapiens GN=AADAT PE=1 SV=2	AADAT (1)	AADAT (1)	AADAT (1;1)	Both		1	1		0.265115	0.456813	0.150811		0.271751	0.478295	0.198702		0.118001	0.861163	-0.0302919		0.421014	0.278343	0.289567		0.0801644	1	0.0381401		0.133591	1	0.141809		0.0258272	0.985477	-0.0215357		0.0942139	1	-0.0918053			-0.0703816	0.0670657	-0.0238603	-0.0248395	-0.107551
4390	Q08752	PPID	Peptidyl-prolyl cis-trans isomerase D OS=Homo sapiens GN=PPID PE=1 SV=3	PPID (18)	PPID (8)	PPID (18;8)	Both		18	8		0.297483	0.674339	-0.0599147		1.14408	0.353696	0.212182		0.0393851	0.951381	0.0101155		0.745211	0.230174	0.289079		0.311835	1	0.0966844		0.0347381	1	0.00715445		0.0109892	0.998147	0.00474994		0.323787	1	-0.123926			-0.0904644	0.0850725	-0.0608839	0.238332	0.040334
1796	P11171	EPB41	Protein 4.1 OS=Homo sapiens GN=EPB41 PE=1 SV=4	EPB41 (39)	EPB41 (32)	EPB41 (39;32)	Both	Plasma membrane	39	32		1.6794	0.416081	-0.130257		0.221992	0.91387	0.018947		1.86195	0.368335	0.142204		0.634261	0.249924	0.288911		0.0979795	1	0.00964417		0.501848	1	-0.0625613		0.387895	1	-0.155576		0.083651	1	0.0537561			-0.012496	0.0123807	-0.128882	0.0023939	0.149617
732	P02747	C1QC	Complement C1q subcomponent subunit C OS=Homo sapiens GN=C1QC PE=1 SV=3	C1QC (4)	C1QC (3)	C1QC (4;3)	Both		4	3		0.347726	0.504541	0.112699		0.180678	0.765196	-0.054744		0.155543	0.626213	0.0897406		0.744027	0.235915	0.288892		0.379138	1	0.22739		0.385603	1	0.231914		0.149386	0.967376	0.0840647		0.510516	1	-0.200762			0.0978781	-0.104936	0.210345	0.0318429	-0.0885224
6225	Q15631	TSN	Translin OS=Homo sapiens GN=TSN PE=1 SV=1	TSN (11)	TSN (9)	TSN (11;9)	Both		11	9		0.132869	0.838216	0.0338911		1.93176	0.602795	-0.0918061		3.10655	0.295458	0.177891		3.70451	0.205252	0.288549		0.0358721	1	0.0105103		0.112373	1	-0.0420682		0.259493	0.966393	-0.0741632		0.0784486	1	0.0189659			-0.00852495	0.00846949	-0.0434644	-0.0943028	0.169682
1742	A0A0U1RQK7	EIF4G3	Eukaryotic translation initiation factor 4 gamma 3 OS=Homo sapiens GN=EIF4G3 PE=1 SV=1	EIF4G3 (30)	EIF4G3 (24)	EIF4G3 (30;24)	Both		30	24		1.56913	0.263563	-0.22492		0.396798	0.753507	0.059052		2.05255	0.561874	0.0817428		3.85247	0.205315	0.288526		0.846961	1	-0.117328		0.293429	1	0.0112586		1.02281	1	-0.192178		1.66576	1	0.0636601			-0.0172243	0.0170102	-0.199702	0.0138978	0.0788297
739	Q86YS7	C2CD5	C2 domain-containing protein 5 OS=Homo sapiens GN=C2CD5 PE=1 SV=1	C2CD5 (7)	C2CD5 (9)	C2CD5 (7;9)	Both	Plasma membrane	7	9		0.193986	0.708712	-0.0599728		0.343827	0.853823	-0.0309963		0.350201	0.834019	0.0316083		2.65138	0.208675	0.288351		0.138545	1	0.0408718		1.36339	1	-0.0989885		1.2712	1	-0.168891		1.13677	1	-0.125569			-0.0690323	0.0658386	-0.155864	-0.037552	0.0370611
4927	O15541	RNF113A	RING finger protein 113A OS=Homo sapiens GN=RNF113A PE=1 SV=1	RNF113A (2)	RNF113A (1)	RNF113A (2;1)	Both		2	1		0.418067	0.25835	0.288795		0.0648462	0.821253	0.0492705		0.0949424	0.805581	0.0420806		0.457859	0.261646	0.28814		0.555897	1	0.278796		0.252209	1	0.127773		0.140378	0.979912	0.134057		0.0487317	1	-0.0328743			-0.0196139	0.0193386	0.0701517	-0.176385	0.156968
3238	Q15528	MED22	Mediator of RNA polymerase II transcription subunit 22 OS=Homo sapiens GN=MED22 PE=1 SV=2	MED22 (2)	MED22 (1)	MED22 (2;1)	Both		2	1		0.438471	0.324997	0.201497		0.105573	0.647194	-0.111339		0.34545	0.388151	0.15727		0.8906	0.223911	0.287416		0.279906	1	0.204555		0.233866	1	0.101964		0.36432	1	-0.284411		0.878311	1	-0.335926			0.232537	-0.277164	0.0476076	-0.437717	0.275483
5138	Q9Y6B6	SAR1B	GTP-binding protein SAR1b OS=Homo sapiens GN=SAR1B PE=1 SV=1	SAR1B (6)	SAR1B (3)	SAR1B (6;3)	Both		6	3		0.219173	0.765535	0.0424277		0.591441	0.618667	0.0891169		0.467603	0.6172	0.0730551		0.667561	0.241145	0.287383		0.155989	1	0.0486337		0.156832	1	-0.0615097		0.104656	0.962798	0.0498378		0.0747101	1	0.03842			-0.162444	0.145902	-0.00208706	0.081828	0.0510557
1735	Q8N5X7	EIF4E3	Eukaryotic translation initiation factor 4E type 3 OS=Homo sapiens GN=EIF4E3 PE=2 SV=4	EIF4E3 (2)	EIF4E3 (1)	EIF4E3 (2;1)	Both		2	1		0.526745	0.366203	-0.174225		0.418814	0.492841	-0.163331		0.0549174	0.915404	-0.0168269		1.47331	0.216261	0.285775		0.0522062	1	0.0223784		0.251612	1	0.063485		1.00002	1	-0.304384		0.784039	1	0.190477			0.0485421	-0.0502	-0.0768212	-0.0473938	0.0508223
741	P01024	C3	Complement C3 OS=Homo sapiens GN=C3 PE=1 SV=2	C3 (8)	C3 (8)	C3 (8;8)	Both		8	8		0.721646	0.481634	0.114206		0.499511	0.813133	-0.0392338		0.0426769	0.888007	0.0275786		1.12297	0.227468	0.285692		0.43326	1	0.287701		0.333547	1	0.216003		0.548282	0.976685	0.104963		1.02062	1	-0.23685			0.0609919	-0.0636438	0.160561	-0.0208915	-0.159043
1147	Q9BT09	CNPY3	Protein canopy homolog 3 OS=Homo sapiens GN=CNPY3 PE=1 SV=1	CNPY3 (5)	CNPY3 (4)	CNPY3 (5;4)	Both		5	4		0.653074	0.686309	-0.0549779		0.267975	0.91603	0.0185057		0.799683	0.312508	0.196737		1.26062	0.22777	0.28552		0.303538	1	-0.0834354		0.107911	1	0.0338495		0.797946	1	-0.139157		0.00111607	1	0.000281662			0.0519419	-0.0538474	-0.0809481	0.00751923	0.259247
1810	P54753	EPHB3	Ephrin type-B receptor 3 OS=Homo sapiens GN=EPHB3 PE=1 SV=2	EPHB3 (7)	EPHB3 (3)	EPHB3 (7;3)	Both		7	3		0.137481	0.757493	0.0508735		1.05214	0.492577	0.139885		0.752406	0.28001	0.21787		2.08172	0.211577	0.285454		0.0915265	1	-0.0375105		0.375234	1	-0.107438		0.192337	0.971006	-0.0277366		0.207872	1	-0.0313657			0.0385694	-0.0396037	-0.0618707	0.101031	0.130459
3186	Q96N66	MBOAT7	Lysophospholipid acyltransferase 7 OS=Homo sapiens GN=MBOAT7 PE=1 SV=2	MBOAT7 (3)	MBOAT7 (3)	MBOAT7 (3;3)	Both	ER-Membrane	3	3		0.382512	0.298697	0.251116		2.45298	0.260685	0.309193		0.766133	0.13994	0.409143		0.312819	0.305555	0.285366		0.392261	1	0.170398		0.116445	1	0.0515586		0.12471	0.973503	-0.115376		0.0199611	1	-0.0233613			0.0699787	-0.0734994	0.0530086	0.329062	0.273903
2897	Q14974	KPNB1	Importin subunit beta-1 OS=Homo sapiens GN=KPNB1 PE=1 SV=2	KPNB1 (43)	KPNB1 (29)	KPNB1 (43;29)	Both		43	29		1.10922	0.47842	0.121897		1.57662	0.446437	0.174667		1.47284	0.274168	0.223792		0.723697	0.251065	0.28534		0.130122	1	0.0627729		0.317339	1	-0.0853347		0.310051	0.964076	-0.0898728		0.375555	1	-0.110011			-0.000144043	0.00014377	0.106558	0.182977	0.21128
493	Q13733	ATP1A4	Sodium/potassium-transporting ATPase subunit alpha-4 OS=Homo sapiens GN=ATP1A4 PE=1 SV=3	ATP1A4 (8)	ATP1A4 (10)	ATP1A4 (8;10)	Both		8	10		0.179113	0.878149	-0.0223966		0.0522051	0.970383	0.00680927		0.364513	0.620922	-0.0796962		0.881712	0.235618	0.284995		0.301248	1	0.0677866		0.0747986	1	-0.0188528		0.87856	1	-0.25835		0.0292226	1	-0.00932535			0.0696956	-0.0731868	0.00902027	-0.0238588	-0.0128837
129	P11766	ADH5	Alcohol dehydrogenase class-3 OS=Homo sapiens GN=ADH5 PE=1 SV=4	ADH5 (27)	ADH5 (21)	ADH5 (27;21)	Both		27	21		0.523879	0.388168	0.159867		0.30831	0.633545	0.0891776		1.53763	0.131325	0.356971		1.45001	0.216716	0.284885		0.480388	1	0.111359		0.0231311	1	0.00535536		0.879351	1	-0.20436		0.1367	1	0.0916969			0.0830197	-0.0880329	0.0594192	0.165955	0.286625
2908	Q9H9P8	L2HGDH	L-2-hydroxyglutarate dehydrogenase, mitochondrial OS=Homo sapiens GN=L2HGDH PE=1 SV=3	L2HGDH (7)	L2HGDH (10)	L2HGDH (7;10)	Both		7	10		0.932177	0.336695	0.195766		1.1282	0.764871	-0.0521233		2.61656	0.561467	0.0829602		0.868524	0.245338	0.284794		0.559914	1	0.0305262		0.0380474	1	0.0111193		0.0535503	0.994305	0.0124173		0.393879	1	-0.0804328			0.00888148	-0.00893078	0.158202	-0.0617962	0.0779371
2624	P41252	IARS	Isoleucine--tRNA ligase, cytoplasmic OS=Homo sapiens GN=IARS PE=1 SV=2	IARS (37)	IARS (31)	IARS (37;31)	Both		37	31		0.347315	0.918723	0.014914		1.65108	0.650786	0.0746446		0.527396	0.61321	0.0810172		1.28317	0.22777	0.284773		0.303793	1	-0.0449973		0.71068	1	0.134115		0.247712	0.96108	-0.0504416		0.624895	1	0.0850004			-0.0292607	0.0286608	0.0213065	0.0626574	0.0358482
5319	Q9Y3L3	SH3BP1	SH3 domain-binding protein 1 OS=Homo sapiens GN=SH3BP1 PE=1 SV=3	SH3BP1 (6)	SH3BP1 (6)	SH3BP1 (6;6)	Both		6	6		0.0426531	0.929147	-0.0162821		0.177428	0.756124	-0.063043		1.21087	0.199226	0.292074		0.587154	0.260767	0.284546		0.187734	1	-0.0271483		0.575665	1	-0.0829943		0.117123	0.964273	-0.0493056		0.0785606	1	-0.0505182			-0.00595367	0.00592534	-0.126278	-0.171734	0.250495
1941	Q8N128	FAM177A1	Protein FAM177A1 OS=Homo sapiens GN=FAM177A1 PE=1 SV=1	FAM177A1 (1)	FAM177A1 (4)	FAM177A1 (1;4)	Both		1	4		0.227907	0.708377	0.0582381		0.107466	0.814854	-0.0494554		0.793899	0.634096	0.0675629		1.25588	0.224319	0.284546		0.199387	1	-0.104181		0.0300406	1	-0.0159313		0.846172	1	-0.181063		0.6493	1	-0.12567			-0.0880551	0.0829374	-0.0216316	-0.188092	0.0508167
5257	Q9NVA2	SEPT11	Septin-11 OS=Homo sapiens GN=SEPT11 PE=1 SV=3	SEPT11 (6)	SEPT11 (10)	SEPT11 (6;10)	Both		6	10		0.177878	0.751567	0.0528436		0.143111	0.872282	0.0316844		0.0945533	0.948896	0.0107564		2.12277	0.215743	0.284531		0.451667	1	0.0932568		0.285754	1	-0.0696567		0.721535	0.964946	-0.0743389		0.365124	1	-0.0306873			-0.0482997	0.0467057	0.143192	-0.0356555	0.0420533
2913	Q53H82	LACTB2	Endoribonuclease LACTB2 OS=Homo sapiens GN=LACTB2 PE=1 SV=2	LACTB2 (3)	LACTB2 (2)	LACTB2 (3;2)	Both		3	2		0.280804	0.512858	0.1209		0.462774	0.61805	-0.103814		4.33994	0.204234	0.247417		0.514656	0.272312	0.283803		1.26189	1	0.0512791		0.523676	1	0.0681844		0.0965311	0.962959	-0.060423		0.220976	1	-0.106591			0.0047535	-0.00476637	0.251249	-0.0409121	0.247207
3214	P40926	MDH2	Malate dehydrogenase, mitochondrial OS=Homo sapiens GN=MDH2 PE=1 SV=3	MDH2 (39)	MDH2 (38)	MDH2 (39;38)	Both	Mitochondrion-Mtx	39	38		0.274113	0.790208	0.0374406		1.15647	0.352545	0.216454		0.598846	0.543163	0.0899631		2.2438	0.211183	0.283792		0.254517	1	0.0574506		0.668825	1	-0.126374		0.835911	0.972925	-0.0659594		0.76857	1	-0.0602968			-0.0830298	0.0784618	0.00649952	0.159853	0.0435215
2026	P02671	FGA	Fibrinogen alpha chain OS=Homo sapiens GN=FGA PE=1 SV=2	FGA (16)	FGA (19)	FGA (16;19)	Both		16	19		0.14775	0.723344	0.0558242		0.355626	0.673473	-0.0719364		0.142796	0.65687	-0.0800616		1.52315	0.218628	0.282884		0.665945	1	0.428525		0.635209	1	0.369041		0.0425311	0.984109	0.0241139		0.549652	1	-0.375699			0.142221	-0.157685	0.158989	-0.034856	-0.253449
887	Q53HC0	CCDC92	Coiled-coil domain-containing protein 92 OS=Homo sapiens GN=CCDC92 PE=1 SV=2	CCDC92 (4)	CCDC92 (4)	CCDC92 (4;4)	Both		4	4		1.04076	0.387054	0.149364		0.611581	0.697817	0.0634666		0.0473947	0.959476	0.00907711		1.37925	0.220464	0.282837		0.1554	1	0.0264249		0.578675	1	0.0996194		0.450992	0.978984	-0.110809		0.188716	1	0.104681			-0.0080587	0.00800897	0.190848	0.0364723	-0.041737
5401	Q86WA9	SLC26A11	Sodium-independent sulfate anion transporter OS=Homo sapiens GN=SLC26A11 PE=2 SV=2	SLC26A11 (3)	SLC26A11 (1)	SLC26A11 (3;1)	Both		3	1		0.0652029	0.762531	0.057058		0.00623617	0.991371	-0.00266921		0.073507	0.767721	0.0569781		0.829355	0.228959	0.282385		0.142715	1	0.104809		0.176385	1	0.128602		0.642543	1	0.277434		0.313108	1	0.105733			0.0567287	-0.0590128	0.298463	0.0839537	0.269498
3859	Q9BQG2	NUDT12	Peroxisomal NADH pyrophosphatase NUDT12 OS=Homo sapiens GN=NUDT12 PE=1 SV=1	NUDT12 (6)	NUDT12 (6)	NUDT12 (6;6)	Both		6	6		0.799527	0.36623	0.160344		0.539459	0.574882	0.11147		0.266547	0.646147	0.0694378		1.29597	0.220386	0.282168		0.490575	1	0.104225		0.000257122	1	-5.52994e-05		0.753293	1	0.1604		0.096884	1	-0.0183702			-0.0854374	0.0806095	0.185114	0.0764483	0.121559
4029	P11498	PC	Pyruvate carboxylase, mitochondrial OS=Homo sapiens GN=PC PE=1 SV=2	PC (10)	PC (16)	PC (10;16)	Both	Mitochondrion-Mtx	10	16		0.236181	0.932523	-0.0137292		0.591709	0.660914	0.08504		3.44916	0.405994	0.125491		0.972691	0.243535	0.282069		1.30796	1	-0.0694798		0.0854979	1	0.0146188		0.763003	1	-0.206835		0.438746	1	0.0994401			-0.00803155	0.00798195	-0.0316993	0.047726	0.119994
838	P04040	CAT	Catalase OS=Homo sapiens GN=CAT PE=1 SV=3	CAT (4)	CAT (6)	CAT (4;6)	Both	Peroxisome	4	6		1.45839	0.338976	0.172675		0.423682	0.559616	0.134537		0.32693	0.6534	-0.0754098		0.695617	0.252977	0.281559		1.05693	1	0.295101		0.821975	1	0.240759		0.0379994	0.989095	-0.0182589		0.213385	1	-0.127448			0.0459049	-0.0473834	0.200836	0.0409258	-0.146486
1148	Q8N129	CNPY4	Protein canopy homolog 4 OS=Homo sapiens GN=CNPY4 PE=2 SV=1	CNPY4 (2)	CNPY4 (3)	CNPY4 (2;3)	Both	ER-Membrane	2	3		0.0270243	0.941089	-0.0120269		0.545048	0.498063	0.146844		0.512512	0.229127	0.279351		0.512533	0.253238	0.281392		0.0212879	1	0.0146406		0.130489	1	0.0834335		0.214804	1	-0.184818		0.134131	1	0.0821533			0.247957	-0.299393	0.0702454	0.127428	0.436124
1076	P12277	CKB	Creatine kinase B-type OS=Homo sapiens GN=CKB PE=1 SV=1	CKB (176)	CKB (136)	CKB (176;136)	Both		176	136		2.40586	0.527439	0.0878632		0.336277	0.95255	-0.00944466		1.39399	0.173275	0.321834		4.12301	0.209675	0.280771		0.144186	1	0.0150612		0.12429	1	-0.0246002		1.10933	0.966497	-0.0723683		0.920298	1	-0.0444935			0.0133416	-0.0134578	0.0883863	-0.00624607	0.353369
2397	Q969Y2	GTPBP3	tRNA modification GTPase GTPBP3, mitochondrial OS=Homo sapiens GN=GTPBP3 PE=1 SV=2	GTPBP3 (2)	GTPBP3 (2)	GTPBP3 (2;2)	Both		2	2		0.309035	0.701646	-0.0600641		0.599373	0.795898	-0.0440434		1.08389	0.322761	0.18251		2.8855	0.211704	0.280533		0.774507	1	-0.120212		0.472579	1	-0.0843663		0.503143	0.964408	-0.080018		0.930648	1	-0.147122			0.0433716	-0.0446873	-0.00067433	-0.0671912	0.220205
6257	Q8N5M4	TTC9C	Tetratricopeptide repeat protein 9C OS=Homo sapiens GN=TTC9C PE=1 SV=1	TTC9C (2)	TTC9C (2)	TTC9C (2;2)	Both		2	2		0.568984	0.660557	0.061302		0.0897276	0.900264	-0.0256614		0.503165	0.630681	0.0733442		0.378467	0.296463	0.280211		0.0554938	1	0.0524408		0.229277	1	-0.140699		0.00454397	0.998564	0.0042976		0.121635	1	0.0910241			0.00241399	-0.00241649	0.0277316	-0.11041	0.117904
5874	O75347	TBCA	Tubulin-specific chaperone A OS=Homo sapiens GN=TBCA PE=1 SV=3	TBCA (12)	TBCA (10)	TBCA (12;10)	Both		12	10		0.542381	0.460499	0.132206		0.493537	0.813062	0.0405848		1.52269	0.42223	0.123247		0.934897	0.240266	0.28012		0.798116	1	0.0847669		0.841246	1	-0.0946134		0.835185	1	-0.21166		0.140056	1	0.0467481			0.00179696	-0.00179825	0.0621448	0.0649938	0.145015
4445	P63098	PPP3R1	Calcineurin subunit B type 1 OS=Homo sapiens GN=PPP3R1 PE=1 SV=2	PPP3R1 (4)	PPP3R1 (5)	PPP3R1 (4;5)	Both		4	5		0.749577	0.224709	-0.317075		0.0040235	0.992706	0.00238563		1.31959	0.115096	-0.40179		0.928638	0.227782	0.280105		0.0172774	1	0.00539184		0.295448	1	0.0443458		0.39291	0.963202	0.0599537		0.893826	1	-0.152869			-0.202395	0.177357	-0.206399	0.123644	-0.464704
3982	P22234	PAICS	Multifunctional protein ADE2 OS=Homo sapiens GN=PAICS PE=1 SV=3	PAICS (27)	PAICS (27)	PAICS (27;27)	Both		27	27		0.517245	0.674346	0.0619667		0.570739	0.532762	0.145155		2.44769	0.341795	0.154717		0.472114	0.282131	0.279815		0.442005	1	0.18417		0.172714	1	0.0266065		0.138988	0.963817	-0.0760316		0.0524855	1	0.0543763			-0.0106733	0.0105882	0.0248441	0.214917	0.151478
1359	Q16850	CYP51A1	Lanosterol 14-alpha demethylase OS=Homo sapiens GN=CYP51A1 PE=1 SV=3	CYP51A1 (14)	CYP51A1 (16)	CYP51A1 (14;16)	Both	ER-Membrane	14	16		3.48944	0.310186	0.176603		0.98064	0.213407	0.444572		0.524054	0.252583	0.274233		0.758413	0.25278	0.279655		0.351162	1	-0.16352		0.219138	1	0.120416		0.197362	0.961865	0.0570036		0.735253	1	0.212723			0.0280425	-0.0285801	0.183924	0.523797	0.414592
5653	Q8WXF0	SRSF12	Serine/arginine-rich splicing factor 12 OS=Homo sapiens GN=SRSF12 PE=2 SV=1	SRSF12 (1)	SRSF12 (2)	SRSF12 (1;2)	Both		1	2		0.723134	0.234034	-0.299113		0.0877547	0.748996	0.0663642		0.544803	0.241661	-0.254023		0.338666	0.287449	0.279577		0.15911	1	-0.0992117		0.00424239	1	-0.00202771		0.183859	0.99673	-0.157124		0.270224	1	-0.224953			-0.405992	0.316294	-0.433916	0.248952	-0.409708
2006	P0C2W1	FBXO45	F-box/SPRY domain-containing protein 1 OS=Homo sapiens GN=FBXO45 PE=1 SV=1	FBXO45 (1)	FBXO45 (1)	FBXO45 (1;1)	Both		1	1		0.359181	0.441001	-0.133944		0.440591	0.491346	0.154012		0.154617	0.59689	-0.0892755		0.838311	0.228927	0.279436		0.256366	1	-0.12824		0.671175	1	-0.393235		0.647852	0.968273	0.0800476		1.11775	1	-0.134828			-0.367776	0.292642	-0.212296	0.153954	-0.263082
717	Q96DM3	C18orf8	Uncharacterized protein C18orf8 OS=Homo sapiens GN=C18orf8 PE=1 SV=2	C18orf8 (5)	C18orf8 (6)	C18orf8 (5;6)	Both	Endosome	5	6		4.7097	0.243804	-0.239656		0.355572	0.623292	0.10352		3.5407	0.592755	0.0733261		0.444315	0.286113	0.279405		0.0509541	1	0.0372056		0.019975	1	-0.00925158		0.312788	1	-0.183159		0.0850817	1	-0.0613343			-0.011311	0.011216	-0.240354	0.189549	0.0708319
6387	Q9NYU2	UGGT1	UDP-glucose:glycoprotein glucosyltransferase 1 OS=Homo sapiens GN=UGGT1 PE=1 SV=3	UGGT1 (36)	UGGT1 (30)	UGGT1 (36;30)	Both	ER-Lumen	36	30		0.502244	0.780002	0.0404618		0.36737	0.916112	-0.018321		2.74394	0.308582	0.170325		3.46971	0.211785	0.27887		0.172226	1	-0.0201578		0.284365	1	-0.0466131		0.851099	1	-0.156263		0.0866717	1	0.0180036			0.0168499	-0.0170383	0.015	-0.0295858	0.182871
6044	Q8N2U0	TMEM256	Transmembrane protein 256 OS=Homo sapiens GN=TMEM256 PE=3 SV=1	TMEM256 (4)	TMEM256 (4)	TMEM256 (4;4)	Both		4	4		0.133084	0.9236	0.0142202		0.943841	0.601076	-0.093317		0.711772	0.299446	0.209483		0.725184	0.250011	0.27847		0.238022	1	0.0641438		0.291268	1	0.0784075		0.317427	0.973802	-0.104011		0.0709038	1	-0.0379268			0.0123192	-0.0124176	0.0248963	-0.0680965	0.290157
1188	P53618	COPB1	Coatomer subunit beta OS=Homo sapiens GN=COPB1 PE=1 SV=3	COPB1 (31)	COPB1 (28)	COPB1 (31;28)	Both		31	28		1.03299	0.375387	0.159992		1.01456	0.655218	0.0752362		1.5501	0.51741	0.0924038		1.47295	0.227151	0.278074		1.29323	1	0.0661645		0.27845	1	-0.00852139		0.0420168	0.993836	-0.0135331		0.112168	1	-0.014789			-0.0591844	0.0568165	0.118689	0.0965768	0.0975326
2582	Q99714	HSD17B10	3-hydroxyacyl-CoA dehydrogenase type-2 OS=Homo sapiens GN=HSD17B10 PE=1 SV=3	HSD17B10 (24)	HSD17B10 (19)	HSD17B10 (24;19)	Both	Mitochondrion-Mtx	24	19		0.175086	0.862333	-0.0282758		1.63303	0.692492	0.0628841		0.321843	0.636717	0.0808591		0.516085	0.278222	0.277903		0.104577	1	0.0266143		0.179383	1	-0.0446529		0.414127	1	-0.209149		0.0223985	1	-0.0183556			-0.0232184	0.0228361	-0.0777658	0.052481	0.00473636
5449	Q15797	SMAD1	Mothers against decapentaplegic homolog 1 OS=Homo sapiens GN=SMAD1 PE=1 SV=1	SMAD1 (5)	SMAD1 (5)	SMAD1 (5;5)	Both		5	5		1.80283	0.238329	-0.260114		0.311348	0.502474	-0.17106		0.239271	0.799636	0.0380349		1.77441	0.219487	0.277713		1.00844	1	-0.100388		1.07448	1	-0.175878		0.515546	0.976412	-0.11327		1.28357	1	-0.165186			-0.141923	0.129126	-0.291623	-0.00514836	0.0102112
1778	O95834	EML2	Echinoderm microtubule-associated protein-like 2 OS=Homo sapiens GN=EML2 PE=1 SV=1	EML2 (1)	EML2 (2)	EML2 (1;2)	Both		1	2		0.0214409	0.949641	0.011097		0.22695	0.817308	0.0409253		1.39843	0.398468	0.132809		0.519032	0.273743	0.277511		0.222739	1	-0.0665242		0.908192	1	-0.106994		0.0584148	0.97276	-0.0307548		0.0299084	1	-0.0158338			0.0813802	-0.0861905	0.154603	0.0925005	0.135542
1854	P13804	ETFA	Electron transfer flavoprotein subunit alpha, mitochondrial OS=Homo sapiens GN=ETFA PE=1 SV=1	ETFA (12)	ETFA (9)	ETFA (12;9)	Both	Mitochondrion-Mtx	12	9		0.928743	0.535233	0.0937793		0.0698788	0.935627	0.017792		2.2234	0.308175	0.175975		0.915798	0.248206	0.277491		0.0626875	1	-0.00896066		0.180603	1	-0.0553639		0.294561	0.962765	-0.0575453		0.350992	1	-0.069351			0.0318085	-0.0325048	0.119656	-0.0569917	0.191217
3414	Q8N5N7	MRPL50	39S ribosomal protein L50, mitochondrial OS=Homo sapiens GN=MRPL50 PE=1 SV=2	MRPL50 (9)	MRPL50 (8)	MRPL50 (9;8)	Both	Mitochondrion-Mtx	9	8		0.036769	0.973616	0.00481179		0.215362	0.658371	0.0920285		1.08977	0.30871	0.185019		2.42892	0.216412	0.27715		0.164484	1	-0.0277653		0.72567	1	-0.158969		0.768197	1	-0.138819		0.0802158	1	0.0335365			-0.026495	0.0260009	-0.0154566	-0.0409677	0.133959
4581	P48556	PSMD8	26S proteasome non-ATPase regulatory subunit 8 OS=Homo sapiens GN=PSMD8 PE=1 SV=2	PSMD8 (16)	PSMD8 (15)	PSMD8 (16;15)	Both	Proteasome	16	15		0.0873291	0.965547	-0.007042		0.875253	0.647233	0.0872585		0.84341	0.674038	0.0667083		0.730551	0.258207	0.277136		0.508611	1	0.0700932		0.288224	1	-0.0169476		0.393457	0.977912	-0.110976		0.0167776	1	-0.0107045			0.000497116	-0.000497115	0.0167663	0.108526	0.0485672
5292	Q15428	SF3A2	Splicing factor 3A subunit 2 OS=Homo sapiens GN=SF3A2 PE=1 SV=2	SF3A2 (5)	SF3A2 (7)	SF3A2 (5;7)	Both		5	7		1.21349	0.553202	0.083252		0.504844	0.606547	-0.102868		2.49487	0.208225	0.248283		1.10188	0.234291	0.276923		0.00204772	0.998511	-0.000467792		1.19129	1	-0.100324		1.07438	1	-0.249966		0.118457	1	0.0896712			0.0609597	-0.0636087	0.0792222	-0.165542	0.248477
3640	Q9UI09	NDUFA12	NADH dehydrogenase [ubiquinone] 1 alpha subcomplex subunit 12 OS=Homo sapiens GN=NDUFA12 PE=1 SV=1	NDUFA12 (3)	NDUFA12 (2)	NDUFA12 (3;2)	Both	Mitochondrion-Mtx	3	2		0.112365	0.761358	0.0502233		0.116498	0.800301	0.0498764		0.115207	0.812187	0.0393031		1.62437	0.220209	0.276901		0.0437091	1	0.0182319		0.0337449	1	0.0143422		1.01296	1	-0.152529		0.275621	1	-0.112517			-0.0457237	0.0442914	-0.0843057	-0.0789016	0.12874
5810	Q7Z422	SZRD1	SUZ domain-containing protein 1 OS=Homo sapiens GN=SZRD1 PE=1 SV=1	SZRD1 (4)	SZRD1 (2)	SZRD1 (4;2)	Both		4	2		0.149337	0.573889	0.10717		1.25652	0.388121	-0.195652		0.0747622	0.60935	0.120712		0.297526	0.319938	0.276867		0.0122226	1	0.0215782		0.052142	1	-0.0878879		0.290135	1	-0.294559		0.0684088	1	0.0823827			0.0564495	-0.0587106	0.324442	-0.157603	0.595828
4841	Q8NBN7	RDH13	Retinol dehydrogenase 13 OS=Homo sapiens GN=RDH13 PE=1 SV=2	RDH13 (3)	RDH13 (3)	RDH13 (3;3)	Both	Mitochondrion-Mtx	3	3		0.42107	0.728946	-0.0479617		0.258428	0.678895	-0.0799737		0.12829	0.775415	-0.0498323		0.330288	0.310341	0.276582		0.148682	1	-0.0640678		0.191289	1	-0.0727276		0.0701254	0.964574	0.0825469		0.304407	1	-0.252099			-0.103251	0.0962932	-0.0698743	-0.177565	-0.167946
1578	H3BNF7	DOC2A	Double C2-like domain-containing protein alpha (Fragment) OS=Homo sapiens GN=DOC2A PE=1 SV=2	DOC2A (2)	DOC2A (2)	DOC2A (2;2)	Both		2	2		0.467949	0.41691	0.142298		0.19083	0.546464	0.163422		0.362805	0.312708	0.219497		0.965557	0.228486	0.27644		0.3174	1	-0.234415		0.246201	1	-0.16313		0.0848665	0.970216	0.0307034		0.0128878	1	0.00437185			-0.204081	0.178651	0.0441936	-0.106279	0.0243509
1924	Q8NC44	FAM134A	Protein FAM134A OS=Homo sapiens GN=FAM134A PE=1 SV=3	FAM134A (3)	FAM134A (3)	FAM134A (3;3)	Both	ER_high_curvature	3	3		0.0478433	0.961649	0.00741821		0.588795	0.400792	0.215689		0.596263	0.710755	0.0536593		1.48354	0.22751	0.276312		0.615261	1	0.0625533		0.160479	1	0.014989		0.287972	0.962376	-0.0647315		0.03506	1	-0.0192647			0.0414239	-0.0426212	-0.0348258	0.115009	0.0263183
1819	P42566	EPS15	Epidermal growth factor receptor substrate 15 OS=Homo sapiens GN=EPS15 PE=1 SV=2	EPS15 (7)	EPS15 (10)	EPS15 (7;10)	Both	Plasma membrane	7	10		0.853639	0.555154	-0.0829652		0.348005	0.604757	-0.108388		1.38188	0.243732	0.22726		2.22865	0.216198	0.276237		0.209732	1	-0.0313872		0.0350445	1	-0.00777853		0.475305	0.961791	0.0482612		0.0960538	1	-0.0122158			0.0763839	-0.0806029	-0.0701981	-0.20664	0.271431
6616	Q15007	WTAP	Pre-mRNA-splicing regulator WTAP OS=Homo sapiens GN=WTAP PE=1 SV=2	WTAP (9)	WTAP (8)	WTAP (9;8)	Both		9	8		1.33993	0.513759	0.0930967		0.0360043	0.985478	-0.00370773		0.72951	0.526324	0.0963298		0.371094	0.30202	0.276225		0.327171	1	0.10344		0.420135	1	-0.0639109		0.0565207	0.965595	-0.042702		0.0731386	1	0.0979936			0.00878456	-0.00883284	0.102248	-0.0233376	0.054962
552	Q6Y288	B3GLCT	Beta-1,3-glucosyltransferase OS=Homo sapiens GN=B3GLCT PE=1 SV=2	B3GLCT (4)	B3GLCT (4)	B3GLCT (4;4)	Both	ER-Membrane	4	4		0.3039	0.824659	-0.0329907		0.511683	0.885186	-0.0248156		1.85346	0.468793	0.104104		0.450866	0.28774	0.276121		0.530974	1	-0.0252408		0.128731	1	-0.00629677		0.402617	1	-0.228957		0.0401648	1	0.0410715			0.0270601	-0.0275599	8.82244e-05	-0.0275571	0.11763
5260	O43236	SEPT4	Septin-4 OS=Homo sapiens GN=SEPT4 PE=1 SV=1	SEPT4 (3)	SEPT4 (4)	SEPT4 (3;4)	Both		3	4		0.877076	0.257478	-0.2394		0.679924	0.409649	0.18699		0.0456954	0.902058	-0.0200037		1.00157	0.22801	0.275998		0.289643	1	0.141939		0.0633081	1	-0.0418414		0.0738781	0.993444	0.0138034		0.245913	1	-0.0410061			-0.145566	0.132136	-0.2646	0.200169	0.0580538
220	P04075	ALDOA	Fructose-bisphosphate aldolase A OS=Homo sapiens GN=ALDOA PE=1 SV=2	ALDOA (62)	ALDOA (54)	ALDOA (62;54)	Both	Plasma membrane	62	54		0.272261	0.789589	0.0424239		0.770252	0.335025	0.265068		0.759903	0.425776	0.137302		1.02932	0.24178	0.27591		0.113252	1	0.0587848		0.275797	1	-0.0926439		0.694379	1	-0.149989		0.202108	1	0.0342502			-0.0299785	0.0293497	-0.00595531	0.342899	0.183012
3000	P36776	LONP1	Lon protease homolog, mitochondrial OS=Homo sapiens GN=LONP1 PE=1 SV=2	LONP1 (30)	LONP1 (21)	LONP1 (30;21)	Both	Mitochondrion-Mtx	30	21		0.228718	0.789085	-0.0398431		0.137998	0.928429	0.0161889		0.579775	0.43818	0.130467		2.40643	0.216045	0.275888		0.065715	1	0.016798		0.119888	1	-0.0291517		0.15954	0.973288	0.0270179		0.524114	1	0.0414055			-0.0224277	0.0220704	0.00921543	-0.00299836	0.197862
5970	O60220	TIMM8A	Mitochondrial import inner membrane translocase subunit Tim8 A OS=Homo sapiens GN=TIMM8A PE=1 SV=1	TIMM8A (2)	TIMM8A (3)	TIMM8A (2;3)	Both		2	3		0.378231	0.25729	-0.30817		0.303219	0.281843	0.420842		0.102423	0.583642	0.119147		2.58733	0.216444	0.275872		0.19424	1	0.364468		0.0833696	1	0.123731		1.0345	0.978175	-0.0976263		0.0283238	1	-0.0174288			-0.0444193	0.0430655	-0.549818	0.838125	0.465614
296	Q63HQ0	AP1AR	AP-1 complex-associated regulatory protein OS=Homo sapiens GN=AP1AR PE=1 SV=1	AP1AR (3)	AP1AR (4)	AP1AR (3;4)	Both	Endosome	3	4		0.581653	0.592431	0.0830265		0.130542	0.923509	0.0193819		0.504661	0.466031	0.12668		0.519843	0.280248	0.275613		0.188732	1	-0.13655		0.106296	1	-0.0986499		0.446854	1	-0.228396		0.044754	1	-0.0355277			-0.00164036	0.00163755	0.0409077	-0.0253293	0.0550785
5080	Q15050	RRS1	Ribosome biogenesis regulatory protein homolog OS=Homo sapiens GN=RRS1 PE=1 SV=2	RRS1 (4)	RRS1 (5)	RRS1 (4;5)	Both		4	5		0.149617	0.862257	0.0284221		0.413297	0.912635	-0.0189356		0.738369	0.276322	0.232867		0.399702	0.297459	0.275484		0.140291	1	-0.0347304		0.159443	1	-0.039717		0.309486	1	-0.204168		0.0590402	1	0.0829337			-0.0407573	0.0396126	0.0857167	-0.00887844	0.158229
4244	H3BTN5	PKM	Pyruvate kinase (Fragment) OS=Homo sapiens GN=PKM PE=1 SV=1	PKM (4)	PKM (6)	PKM (4;6)	Both		4	6		0.125683	0.77849	-0.0478159		0.286753	0.862619	0.0287602		0.309218	0.701907	-0.0605495		0.503866	0.279081	0.275433		0.0266564	1	-0.0161913		0.169092	1	-0.0897134		0.396506	1	-0.207032		0.148162	1	0.19039			-0.085829	0.0809583	-0.163315	0.00809945	-0.122414
6119	P04637	TP53	Cellular tumor antigen p53 OS=Homo sapiens GN=TP53 PE=1 SV=4	TP53 (1)	TP53 (1)	TP53 (1;1)	Both		1	1		0.93931	0.36752	0.15785		0.753286	0.25	-0.397732		1.04764	0.218425	0.259936		0.626861	0.254794	0.275375		1.36374	1	-0.489459		0.0203805	1	0.0117568		0.607648	1	-0.308786		0.0941828	1	-0.0412429			-0.103639	0.0966314	0.203571	-0.261247	0.184125
476	Q9H1Y0	ATG5	Autophagy protein 5 OS=Homo sapiens GN=ATG5 PE=1 SV=2	ATG5 (1)	ATG5 (3)	ATG5 (1;3)	Both		1	3		0.360586	0.286712	0.270321		0.0994057	0.950109	-0.0117383		0.832247	0.318679	0.191418		1.55184	0.227312	0.275346		0.378086	1	-0.0768195		0.533894	1	-0.10555		0.324545	0.972138	-0.0716211		0.136579	1	0.0339603			0.00155234	-0.00155315	0.0474428	-0.0438777	0.25001
4663	Q6ZSR9	Q6ZSR9	Uncharacterized protein FLJ45252 OS=Homo sapiens PE=2 SV=2	Q6ZSR9 (3)	Q6ZSR9 (1)	Q6ZSR9 (3;1)	Both		3	1		0.707729	0.388841	0.167966		0.600629	0.592049	-0.112396		0.899053	0.247878	0.255234		1.30437	0.234521	0.275253		0.707225	1	0.178968		0.242347	1	0.0448895		1.33201	1	0.276391		0.102214	1	-0.0284398			-0.0185976	0.0183493	0.225122	-0.162591	0.31203
6475	Q9P0L0	VAPA	Vesicle-associated membrane protein-associated protein A OS=Homo sapiens GN=VAPA PE=1 SV=3	VAPA (21)	VAPA (25)	VAPA (21;25)	Both	ER-Membrane	21	25		1.75786	0.630629	0.0645068		0.126141	0.896014	0.0271908		0.752931	0.436181	0.134474		4.34865	0.211391	0.275087		0.257267	1	0.044929		0.318722	1	-0.0455241		0.0450032	0.99563	-0.00726469		0.756966	1	-0.0415392			0.030633	-0.0312775	0.0739202	0.0919923	0.177881
2250	Q9Y5P6	GMPPB	Mannose-1-phosphate guanyltransferase beta OS=Homo sapiens GN=GMPPB PE=1 SV=2	GMPPB (7)	GMPPB (8)	GMPPB (7;8)	Both		7	8		1.11067	0.416889	0.131834		0.0700685	0.889095	0.0297214		0.737549	0.228459	0.273901		1.38529	0.227183	0.274855		0.0996318	1	-0.0326171		0.0932647	1	0.0320512		0.27933	0.96571	0.0760136		0.12228	1	-0.0204266			-0.0923381	0.0867286	0.0952516	0.151704	0.1747
4572	Q9UNM6	PSMD13	26S proteasome non-ATPase regulatory subunit 13 OS=Homo sapiens GN=PSMD13 PE=1 SV=2	PSMD13 (27)	PSMD13 (20)	PSMD13 (27;20)	Both	Proteasome	27	20		0.165859	0.919085	-0.0151		0.387995	0.652785	0.0860846		0.522892	0.726728	0.0503581		2.61212	0.21573	0.274796		0.248058	1	0.0532559		0.55081	1	-0.0495736		0.745085	0.967069	-0.0844016		1.71076	1	-0.0984285			-0.0647597	0.0619387	-0.00860211	0.15385	0.0750062
334	Q9HDC9	APMAP	Adipocyte plasma membrane-associated protein OS=Homo sapiens GN=APMAP PE=1 SV=2	APMAP (24)	APMAP (15)	APMAP (24;15)	Both	ER-Membrane	24	15		1.87554	0.610205	0.0694717		2.24766	0.592267	0.0941287		2.5831	0.329869	0.160001		0.894344	0.250071	0.274686		0.787996	1	0.0488643		1.27739	1	-0.0730759		0.0192036	0.99754	-0.00474729		0.115251	1	-0.0246266			0.00796382	-0.00800292	0.0738098	0.0844769	0.172824
6670	Q04917	YWHAH	14-3-3 protein eta OS=Homo sapiens GN=YWHAH PE=1 SV=4	YWHAH (17)	YWHAH (16)	YWHAH (17;16)	Both		17	16		0.110928	0.877226	0.0251402		0.599284	0.485505	0.165045		0.572638	0.764082	-0.043286		0.230524	0.348401	0.274675		0.612199	1	0.0505145		0.15188	1	-0.0252154		0.219189	1	-0.259873		0.143545	1	0.305769			0.0682331	-0.071575	0.0908821	0.0857679	-0.0286818
2212	Q9NWU2	GID8	Glucose-induced degradation protein 8 homolog OS=Homo sapiens GN=GID8 PE=1 SV=1	GID8 (2)	GID8 (3)	GID8 (2;3)	Both		2	3		0.200424	0.580184	0.0899938		0.299245	0.677104	0.0732912		0.115587	0.83239	0.0336748		1.20063	0.227034	0.274566		0.595965	1	0.0973912		0.634432	1	-0.116956		0.399622	1	-0.187872		0.135556	1	0.086969			-0.0575206	0.0552805	0.211195	0.0482429	0.0693462
4989	P61254	RPL26	60S ribosomal protein L26 OS=Homo sapiens GN=RPL26 PE=1 SV=1	RPL26 (1)	RPL26 (6)	RPL26 (1;6)	Both	Ribosome	1	6		0.0310527	0.877263	-0.0283519		0.410663	0.345444	0.258911		0.269346	0.433211	0.136882		0.492841	0.250939	0.274354		0.143188	1	-0.171441		0.187927	1	-0.316905		0.711842	1	-0.46033		0.422033	1	0.211788			-0.538821	0.391184	-0.292119	0.398081	0.0399587
2447	Q7Z4H3	HDDC2	HD domain-containing protein 2 OS=Homo sapiens GN=HDDC2 PE=1 SV=1	HDDC2 (5)	HDDC2 (6)	HDDC2 (5;6)	Both		5	6		0.531101	0.414812	-0.152796		0.117012	0.861581	-0.0340577		0.661982	0.423661	0.135145		0.633139	0.263573	0.273651		0.137862	1	-0.0285548		0.510195	1	-0.116125		0.635585	1	-0.256816		0.131228	1	-0.0602439			0.04416	-0.0455253	-0.0687351	-0.12157	0.0727105
5145	Q15020	SART3	Squamous cell carcinoma antigen recognized by T-cells 3 OS=Homo sapiens GN=SART3 PE=1 SV=1	SART3 (30)	SART3 (23)	SART3 (30;23)	Both		30	23		0.0606843	0.966273	0.00636378		0.416902	0.73348	0.062212		1.04058	0.355317	0.16307		0.895915	0.249314	0.27365		0.535378	1	0.136603		0.549104	1	0.0693374		0.103098	0.981047	0.0232653		0.209849	1	-0.0449476			0.0148722	-0.0150175	0.0343997	0.107632	0.20047
4658	P06737	PYGL	Glycogen phosphorylase, liver form OS=Homo sapiens GN=PYGL PE=1 SV=4	PYGL (22)	PYGL (19)	PYGL (22;19)	Both		22	19		0.0126831	0.980424	-0.00361826		0.141939	0.909543	-0.0201638		0.18074	0.791555	-0.0426245		1.35253	0.227859	0.273576		0.497801	1	0.12944		0.234311	1	0.0533462		0.0495597	0.995974	-0.0102158		0.502947	1	-0.130779			-0.0669213	0.0639146	0.0696576	0.00593425	-0.114069
5180	P22307	SCP2	Non-specific lipid-transfer protein OS=Homo sapiens GN=SCP2 PE=1 SV=2	SCP2 (5)	SCP2 (8)	SCP2 (5;8)	Both		5	8		1.88348	0.443773	0.117702		0.0207862	0.970385	0.00827625		0.32586	0.45299	0.141035		1.39963	0.228983	0.273142		0.126235	1	0.0547795		0.161187	1	0.0698625		0.373695	0.962633	-0.0520748		0.104134	1	-0.0432645			-0.0520028	0.050162	0.129568	-0.104204	0.00960449
1540	Q9UBS4	DNAJB11	DnaJ homolog subfamily B member 11 OS=Homo sapiens GN=DNAJB11 PE=1 SV=1	DNAJB11 (14)	DNAJB11 (9)	DNAJB11 (14;9)	Both	ER-Lumen	14	9		1.75307	0.373933	0.149259		0.494212	0.843981	-0.0322275		2.93855	0.204396	0.249868		1.46914	0.228976	0.27299		1.55377	1	-0.0789543		0.459885	1	-0.0111472		0.31866	0.96252	0.040225		0.116356	1	0.0339369			0.0421575	-0.0433988	0.17108	-0.0164772	0.254861
6150	Q13114	TRAF3	TNF receptor-associated factor 3 OS=Homo sapiens GN=TRAF3 PE=1 SV=2	TRAF3 (3)	TRAF3 (1)	TRAF3 (3;1)	Both		3	1		0.39606	0.686517	-0.0606828		0.486638	0.592515	-0.114014		1.63399	0.393069	-0.134464		2.19496	0.22076	0.272935		0.278362	1	-0.109903		0.102454	1	0.0279734		0.241744	0.967802	-0.0732889		0.510181	1	-0.0447029			0.00608873	-0.00611083	-0.0136412	-0.183416	-0.112679
1126	Q96KP4	CNDP2	Cytosolic non-specific dipeptidase OS=Homo sapiens GN=CNDP2 PE=1 SV=2	CNDP2 (30)	CNDP2 (31)	CNDP2 (30;31)	Both		30	31		1.72819	0.271131	0.210621		0.342843	0.816999	-0.0399724		1.05869	0.355118	0.158703		2.85923	0.215581	0.272885		0.156758	1	-0.0272196		0.228456	1	-0.0420341		0.883628	1	-0.14155		0.587884	1	0.0504974			0.0369754	-0.0379238	0.240416	-0.0759304	0.199154
6382	Q92890	UFD1	Ubiquitin recognition factor in ER-associated degradation protein 1 OS=Homo sapiens GN=UFD1 PE=1 SV=3	UFD1 (10)	UFD1 (16)	UFD1 (10;16)	Both		10	16		0.419081	0.686888	0.0557679		0.0864649	0.92777	0.0174893		0.872057	0.571231	0.0821381		2.27617	0.217423	0.272867		0.413862	1	-0.111463		0.322467	1	-0.0928951		0.505524	0.968894	-0.0843603		0.327905	1	0.0290688			-0.101506	0.0947733	0.016626	-0.0389679	0.0843891
4951	O43148	RNMT	mRNA cap guanine-N7 methyltransferase OS=Homo sapiens GN=RNMT PE=1 SV=1	RNMT (6)	RNMT (8)	RNMT (6;8)	Both		6	8		1.60014	0.238042	-0.268398		1.71245	0.287768	0.284887		0.95946	0.330538	0.167363		0.349707	0.305798	0.272726		0.0238256	1	0.0277891		0.150822	1	-0.124396		0.243106	1	-0.187947		0.168892	1	-0.136622			0.0572959	-0.0596272	-0.277938	0.319035	0.210841
495	P54709	ATP1B3	Sodium/potassium-transporting ATPase subunit beta-3 OS=Homo sapiens GN=ATP1B3 PE=1 SV=1	ATP1B3 (18)	ATP1B3 (15)	ATP1B3 (18;15)	Both	Plasma membrane	18	15		0.922385	0.811282	0.0324788		2.1539	0.606863	0.0887831		0.577023	0.621043	-0.0800981		3.90593	0.216201	0.272703		0.867862	1	-0.176979		0.323766	1	0.0423412		0.596065	1	-0.173368		1.02073	1	0.112774			-0.0174914	0.0172711	0.0428879	0.0986231	-0.0418196
777	P27708	CAD	CAD protein OS=Homo sapiens GN=CAD PE=1 SV=3	CAD (41)	CAD (35)	CAD (41;35)	Both		41	35		1.80006	0.441325	0.119404		0.161036	0.921791	0.0180456		1.70637	0.241711	0.226646		1.58602	0.227822	0.272385		0.711526	1	0.0783184		0.308859	1	0.0326039		0.563602	0.968864	-0.0712713		0.439842	1	-0.079636			0.0146175	-0.0147576	0.126415	0.0481165	0.194285
6127	O43399	TPD52L2	Tumor protein D54 OS=Homo sapiens GN=TPD52L2 PE=1 SV=2	TPD52L2 (13)	TPD52L2 (11)	TPD52L2 (13;11)	Both		13	11		0.283869	0.583628	0.0912871		0.689731	0.620537	0.0882922		0.175231	0.745808	0.0563669		1.26251	0.229723	0.272257		0.0467325	1	-0.0212328		0.424835	1	-0.151407		0.524918	0.975267	-0.0942859		0.154009	1	0.0756462			-0.0723732	0.0688726	-0.00932366	0.0476463	-0.0428933
553	B4DLN1	B4DLN1	cDNA FLJ60124, highly similar to Mitochondrial dicarboxylate carrier OS=Homo sapiens PE=2 SV=1	B4DLN1 (7)	B4DLN1 (9)	B4DLN1 (7;9)	Both		7	9		1.58682	0.508413	0.100281		0.404026	0.706593	-0.0726793		0.795253	0.222297	0.286599		4.60728	0.214743	0.272191		0.0637469	1	-0.0178199		0.314755	1	-0.0781768		2.09795	1	-0.160077		0.942788	1	0.0361482			0.0154911	-0.0156493	0.0877621	-0.125244	0.361785
1901	Q96CS3	FAF2	FAS-associated factor 2 OS=Homo sapiens GN=FAF2 PE=1 SV=2	FAF2 (16)	FAF2 (13)	FAF2 (16;13)	Both		16	13		0.154878	0.808173	0.0401482		0.163428	0.778437	0.0572644		0.611643	0.413534	0.147342		0.947254	0.249326	0.272062		0.524954	1	0.123658		0.135635	1	0.0290321		0.0343462	0.996461	-0.010154		0.133718	1	-0.0457131			-0.0213822	0.0210564	-0.0389304	0.16376	0.0828957
55	Q9H845	ACAD9	Acyl-CoA dehydrogenase family member 9, mitochondrial OS=Homo sapiens GN=ACAD9 PE=1 SV=1	ACAD9 (13)	ACAD9 (17)	ACAD9 (13;17)	Both	Mitochondrion-IM	13	17		0.172566	0.879154	0.0250706		0.257365	0.722397	0.0699622		0.647286	0.401149	0.153976		1.38435	0.23607	0.27202		0.111445	1	0.0222801		0.018862	1	-0.00644678		0.643013	0.977619	-0.0984962		0.641774	1	-0.0721639			0.0144419	-0.0145788	0.069265	0.152805	0.213502
1903	Q6P587	FAHD1	Acylpyruvase FAHD1, mitochondrial OS=Homo sapiens GN=FAHD1 PE=1 SV=2	FAHD1 (2)	FAHD1 (5)	FAHD1 (2;5)	Both	Mitochondrion-Mtx	2	5		0.34238	0.568559	0.097076		0.00454376	0.992067	-0.00312876		0.549358	0.628825	0.0781788		0.425697	0.297543	0.271725		0.376397	1	-0.125276		0.0638119	1	-0.00886861		0.180402	0.973107	-0.107635		0.141949	1	-0.0924137			0.0303703	-0.0310037	0.181836	-0.194567	0.118503
181	P27144	AK4	Adenylate kinase 4, mitochondrial OS=Homo sapiens GN=AK4 PE=1 SV=1	AK4 (4)	AK4 (9)	AK4 (4;9)	Both	Mitochondrion-Mtx	4	9		1.34863	0.24594	0.247287		0.166537	0.635434	-0.103724		1.85812	0.116448	0.377504		0.488135	0.276185	0.2716		0.101772	1	0.0165516		0.328447	1	0.0564266		0.108687	0.963109	-0.0663731		0.103698	1	0.0745419			0.167462	-0.189357	0.230102	-0.298422	0.420184
4317	Q9NP80	PNPLA8	Calcium-independent phospholipase A2-gamma OS=Homo sapiens GN=PNPLA8 PE=1 SV=1	PNPLA8 (7)	PNPLA8 (4)	PNPLA8 (7;4)	Both		7	4		1.90145	0.413891	-0.129812		0.876049	0.635244	0.0825495		0.379533	0.595901	0.0876903		1.4634	0.228956	0.271493		0.471571	1	-0.109964		5.47809e-05	1	1.40332e-05		0.0626371	0.995141	-0.00868897		0.585324	1	0.0811741			-0.0647305	0.061912	-0.145761	0.0530853	0.0161982
6273	P68371	TUBB4B	Tubulin beta-4B chain OS=Homo sapiens GN=TUBB4B PE=1 SV=1	TUBB4B (27)	TUBB4B (21)	TUBB4B (27;21)	Both		27	21		0.463973	0.488756	0.114934		1.48407	0.208094	0.422547		0.684244	0.324329	0.185999		0.264739	0.338576	0.271363		0.316153	1	0.237724		0.0799217	1	0.0257053		0.250659	1	-0.256051		0.0203756	1	-0.0263511			0.100666	-0.10815	0.0352819	0.487291	0.102051
1723	O15372	EIF3H	Eukaryotic translation initiation factor 3 subunit H OS=Homo sapiens GN=EIF3H PE=1 SV=1	EIF3H (9)	EIF3H (10)	EIF3H (9;10)	Both		9	10		0.334471	0.631879	-0.0689282		0.464436	0.618074	0.0914779		0.0137447	0.983154	0.00355447		1.40294	0.225216	0.271167		0.383067	1	-0.0429488		0.719666	1	-0.076876		0.895409	1	-0.137195		0.555635	1	-0.0702986			-0.124808	0.114796	-0.092673	0.0953141	0.0209584
3523	A0A0A0MQW0	MYEF2	Myelin expression factor 2 OS=Homo sapiens GN=MYEF2 PE=1 SV=1	MYEF2 (6)	MYEF2 (20)	MYEF2 (6;20)	Both		6	20		1.47271	0.286559	-0.206547		0.316096	0.661753	-0.0874896		0.391601	0.580993	0.0930222		0.532532	0.282861	0.271158		0.344589	1	-0.0833982		0.241527	1	-0.0774684		0.550363	1	-0.290753		0.193497	1	-0.0916386			-0.0285613	0.0279893	-0.238801	-0.1725	0.0208442
2362	P06396	GSN	Gelsolin OS=Homo sapiens GN=GSN PE=1 SV=1	GSN (34)	GSN (38)	GSN (34;38)	Both		34	38		0.621709	0.779516	0.0397494		0.34626	0.883658	-0.0262213		2.11024	0.190226	0.27684		1.74304	0.227776	0.270455		0.735787	1	0.0724253		0.338352	1	-0.0247379		0.0478959	0.998257	0.00441273		0.329247	1	-0.0303867			0.0175226	-0.0177267	0.0593417	-0.0497282	0.298754
699	Q9HB07	C12orf10	UPF0160 protein MYG1, mitochondrial OS=Homo sapiens GN=C12orf10 PE=1 SV=2	C12orf10 (8)	C12orf10 (7)	C12orf10 (8;7)	Both		8	7		0.0225534	0.976611	-0.00419024		0.865025	0.658328	0.0739282		1.56301	0.367943	0.142427		0.854627	0.249184	0.270455		0.583598	1	-0.110773		1.22837	1	-0.156333		0.474839	0.994079	-0.129126		0.205685	1	0.113318			-0.0490418	0.0473999	0.0418847	0.0548568	0.163419
5800	O15061	SYNM	Synemin OS=Homo sapiens GN=SYNM PE=1 SV=2	SYNM (15)	SYNM (9)	SYNM (15;9)	Both		15	9		0.729977	0.553287	-0.095158		0.630362	0.605422	-0.106864		0.722967	0.362732	-0.171739		0.857283	0.259061	0.270217		0.263677	1	-0.143445		0.00511886	1	-0.00253412		1.16702	1	-0.302896		0.639577	1	-0.140049			-0.0157711	0.0155908	-0.126002	-0.149405	-0.225721
5676	P50502	ST13	Hsc70-interacting protein OS=Homo sapiens GN=ST13 PE=1 SV=2	ST13 (32)	ST13 (24)	ST13 (32;24)	Both		32	24		0.303663	0.808911	-0.034819		0.466985	0.831849	0.0345653		0.0335151	0.969672	0.00707808		2.70151	0.218852	0.269918		0.328653	1	0.077854		0.399374	1	-0.0765002		0.335688	0.974537	-0.026306		0.0794269	1	-0.0227917			-0.0402571	0.0391396	-0.0012654	0.0515044	0.064918
6795	Q8IYH5	ZZZ3	ZZ-type zinc finger-containing protein 3 OS=Homo sapiens GN=ZZZ3 PE=1 SV=1	ZZZ3 (3)	ZZZ3 (3)	ZZZ3 (3;3)	Both	Nuclear (100% filter)	3	3		0.281899	0.92954	0.013001		0.25546	0.624233	-0.106995		0.220807	0.85187	0.0318488		1.85316	0.228819	0.269783		0.334261	1	-0.0823658		0.529865	1	-0.0940059		0.399318	1	-0.195672		0.442005	1	0.134165			0.00147778	-0.00147843	0.0262028	-0.234794	0.0760237
3652	Q8N183	NDUFAF2	Mimitin, mitochondrial OS=Homo sapiens GN=NDUFAF2 PE=1 SV=1	NDUFAF2 (4)	NDUFAF2 (3)	NDUFAF2 (4;3)	Both	Mitochondrion-Mtx	4	3		0.247531	0.596387	0.0873338		0.600104	0.637341	-0.0810372		0.914367	0.252894	0.234577		2.03053	0.220452	0.269691		0.5758	1	-0.168461		0.271026	1	-0.0667047		1.21323	1	-0.183773		0.175902	1	0.0687256			0.102429	-0.110189	0.193479	-0.116143	0.306626
719	Q9UFG5	C19orf25	UPF0449 protein C19orf25 OS=Homo sapiens GN=C19orf25 PE=1 SV=2	C19orf25 (4)	C19orf25 (2)	C19orf25 (4;2)	Both		4	2		1.49157	0.478308	-0.105578		0.128997	0.855884	-0.0354426		0.505363	0.443812	0.134222		0.497861	0.286878	0.269543		0.444253	1	0.121167		0.529725	1	-0.147868		0.102576	0.963969	-0.064268		0.348741	1	0.222145			-0.0345967	0.0337653	-0.118323	0.0460091	0.211976
2803	Q719H9	KCTD1	BTB/POZ domain-containing protein KCTD1 OS=Homo sapiens GN=KCTD1 PE=1 SV=1	KCTD1 (2)	KCTD1 (1)	KCTD1 (2;1)	Both		2	1		2.22149	0.257384	0.218169		1.69879	0.485965	-0.141679		0.184477	0.817042	0.0386424		0.462899	0.291051	0.269329		0.267539	1	0.145571		0.444554	1	0.0939759		0.171877	0.967546	0.0948948		0.345583	1	0.232552			0.0573655	-0.0597027	0.2168	-0.142782	0.100942
4856	P51606	RENBP	N-acylglucosamine 2-epimerase OS=Homo sapiens GN=RENBP PE=1 SV=2	RENBP (3)	RENBP (3)	RENBP (3;3)	Both		3	3		1.93198	0.355264	0.157072		0.0938044	0.930181	-0.0175285		1.22117	0.271239	0.21467		0.8173	0.253336	0.269254		0.192318	1	0.0432887		0.0563362	1	-0.0254159		0.358958	0.974599	0.0993193		0.309774	1	-0.0792884			-0.0563514	0.0541991	0.135594	-0.072287	0.256688
4121	Q86TG7	PEG10	Retrotransposon-derived protein PEG10 OS=Homo sapiens GN=PEG10 PE=1 SV=2	PEG10 (5)	PEG10 (2)	PEG10 (5;2)	Both		5	2		0.203897	0.414616	0.189995		0.234579	0.400612	0.273284		3.03247	0.071908	0.502487		0.461311	0.291086	0.269152		1.32024	1	0.33947		0.252874	1	-0.0556917		0.00256518	0.997427	-0.00215229		0.294275	1	-0.161028			0.0768896	-0.0811667	-0.0964336	0.627938	0.470621
4468	Q06830	PRDX1	Peroxiredoxin-1 OS=Homo sapiens GN=PRDX1 PE=1 SV=1	PRDX1 (58)	PRDX1 (46)	PRDX1 (58;46)	Both		58	46		0.414273	0.77911	0.0412714		1.5134	0.653364	0.0739891		1.43937	0.325022	0.171736		1.20706	0.23919	0.269108		0.158826	1	0.0149286		0.854972	1	-0.089889		0.6583	0.982217	-0.123326		0.190551	1	0.083525			-0.0167151	0.0165132	0.00987457	0.0641619	0.199957
291	P08758	ANXA5	Annexin A5 OS=Homo sapiens GN=ANXA5 PE=1 SV=2	ANXA5 (26)	ANXA5 (20)	ANXA5 (26;20)	Both		26	20		0.331851	0.687569	-0.0622309		0.224788	0.861678	-0.032389		0.736122	0.354564	0.172467		0.998937	0.248512	0.269094		0.341763	1	0.0741059		0.14807	1	-0.029349		0.219947	0.965876	0.0408485		0.275167	1	-0.0934278			-0.0289485	0.0283612	-0.00483884	0.0113996	0.232222
5787	Q96A49	SYAP1	Synapse-associated protein 1 OS=Homo sapiens GN=SYAP1 PE=1 SV=1	SYAP1 (5)	SYAP1 (7)	SYAP1 (5;7)	Both		5	7		0.220268	0.816934	0.0336214		0.255587	0.720403	0.0671849		0.0774613	0.949714	0.0100677		2.36551	0.220669	0.269051		0.208503	1	0.0448886		0.629366	1	-0.169055		0.122301	0.973289	-0.0293033		0.41819	1	0.117675			-0.0806467	0.0763291	-0.0105481	-0.0154193	0.0342731
6139	Q5VZU9	TPP2	Tripeptidyl-peptidase 2 OS=Homo sapiens GN=TPP2 PE=1 SV=1	TPP2 (1)	TPP2 (1)	TPP2 (1;1)	Both		1	1		0.263077	0.726635	0.0563003		1.27213	0.737645	0.0541354		4.06218	0.106306	0.385904		3.73486	0.215055	0.268911		0.888897	1	-0.25598		0.617571	1	-0.177259		1.05526	1	-0.180041		1.70583	1	0.092101			-0.0407332	0.03959	0.121795	0.0562937	0.372643
1527	Q9NR61	DLL4	Delta-like protein 4 OS=Homo sapiens GN=DLL4 PE=1 SV=1	DLL4 (2)	DLL4 (1)	DLL4 (2;1)	Both		2	1		0.055793	0.768392	-0.0593275		0.446297	0.661959	0.0762637		0.494702	0.365393	0.164825		0.55538	0.26905	0.268897		0.403365	1	0.29089		0.131013	1	0.0462652		0.123226	0.963145	0.070227		0.03151	1	0.0213179			-0.0656102	0.0627166	0.243202	0.06429	0.055654
5523	P62316	SNRPD2	Small nuclear ribonucleoprotein Sm D2 OS=Homo sapiens GN=SNRPD2 PE=1 SV=1	SNRPD2 (17)	SNRPD2 (18)	SNRPD2 (17;18)	Both		17	18		0.185439	0.848592	0.0272211		0.968198	0.440998	0.164144		0.755939	0.291141	0.207843		0.851572	0.245796	0.268658		0.263648	1	0.0709878		0.17112	1	0.0503178		0.00133863	1	-0.000439376		0.0236725	1	-0.0100722			-0.133824	0.122383	0.00884387	0.211892	0.122383
3953	Q8WZ82	OVCA2	Esterase OVCA2 OS=Homo sapiens GN=OVCA2 PE=1 SV=1	OVCA2 (1)	OVCA2 (2)	OVCA2 (1;2)	Both		1	2		1.65829	0.246705	0.23394		0.298639	0.576042	0.129266		0.245995	0.433301	-0.155639		0.923395	0.240742	0.268182		0.359972	1	0.22905		0.269487	1	0.172719		0.653837	1	-0.201748		0.267905	1	-0.0736499			-0.145195	0.131829	0.254801	-0.00839849	-0.354024
1432	O00148	DDX39A	ATP-dependent RNA helicase DDX39A OS=Homo sapiens GN=DDX39A PE=1 SV=2	DDX39A (7)	DDX39A (7)	DDX39A (7;7)	Both		7	7		2.16988	0.3245	-0.171904		0.513338	0.299805	0.334391		0.914588	0.15306	0.372152		0.442324	0.298711	0.267955		0.122793	1	0.127022		0.0266624	1	0.0261711		0.384355	1	-0.221762		0.156436	1	-0.102493			0.0361005	-0.0370034	-0.191117	0.510881	0.453959
1005	O00748	CES2	Cocaine esterase OS=Homo sapiens GN=CES2 PE=1 SV=1	CES2 (4)	CES2 (4)	CES2 (4;4)	Both		4	4		1.93468	0.418859	0.130082		1.4852	0.689122	0.0652751		0.41928	0.677404	0.0687961		3.05487	0.220615	0.267216		0.0855496	1	0.037326		0.336483	1	-0.117048		0.365295	0.967842	0.0318351		0.86595	1	0.0494422			-0.0101652	0.0100875	0.143948	0.0531616	0.116996
857	Q8IX12	CCAR1	Cell division cycle and apoptosis regulator protein 1 OS=Homo sapiens GN=CCAR1 PE=1 SV=2	CCAR1 (26)	CCAR1 (24)	CCAR1 (26;24)	Both		26	24		0.371339	0.760906	0.0481722		0.237642	0.939127	0.0142247		3.77692	0.224292	0.228764		3.14956	0.220381	0.267198		0.827731	1	0.0651978		0.0967028	1	-0.0167586		0.488959	0.980567	-0.0214863		0.2184	1	0.0313388			-0.0135913	0.0134558	0.00883755	-0.0040395	0.230626
4231	A6PW57	PIP5K1A	Phosphatidylinositol 4-phosphate 5-kinase type-1 alpha OS=Homo sapiens GN=PIP5K1A PE=1 SV=2	PIP5K1A (9)	PIP5K1A (5)	PIP5K1A (9;5)	Both		9	5		0.836992	0.272784	0.23471		1.31406	0.252719	0.35339		1.53672	0.279257	0.198134		2.50622	0.219395	0.267114		0.358623	1	0.0403545		0.941343	1	0.188567		0.315816	0.996962	0.149159		1.76832	1	0.295451			0.00310867	-0.00311341	0.161934	0.295837	0.162799
4769	P61225	RAP2B	Ras-related protein Rap-2b OS=Homo sapiens GN=RAP2B PE=1 SV=1	RAP2B (2)	RAP2B (3)	RAP2B (2;3)	Both	Plasma membrane	2	3		1.62855	0.242009	-0.262803		0.336579	0.756947	-0.0531531		0.77059	0.618201	-0.0717959		2.05039	0.220388	0.267075		0.597712	1	-0.0497999		0.118633	1	-0.0234119		1.35707	1	-0.204619		0.832456	1	-0.207478			-0.0907597	0.0853339	-0.22187	-0.00808516	-0.0719699
1316	Q8WZ74	CTTNBP2	Cortactin-binding protein 2 OS=Homo sapiens GN=CTTNBP2 PE=1 SV=1	CTTNBP2 (10)	CTTNBP2 (8)	CTTNBP2 (10;8)	Both		10	8		0.472951	0.796296	0.0361404		0.0563298	0.95303	0.0104394		0.674652	0.426708	0.134062		2.04879	0.222882	0.266597		0.177695	1	-0.035009		0.109642	1	0.0214955		0.697874	0.965546	-0.0761911		0.0141727	0.999475	-0.00241209			0.0748546	-0.0789007	0.0386536	-0.0411526	0.191789
2090	Q5SZK8	FREM2	FRAS1-related extracellular matrix protein 2 OS=Homo sapiens GN=FREM2 PE=1 SV=2	FREM2 (2)	FREM2 (1)	FREM2 (2;1)	Both		2	1		0.0798325	0.891042	-0.0246029		0.0690143	0.952723	0.0118591		0.216877	0.610972	0.0917783		0.69527	0.275434	0.266565		0.124217	1	0.135436		0.0185489	1	-0.0109428		0.084076	0.966531	-0.0374081		0.1012	1	-0.0806085			-0.00268948	0.00268267	0.0664966	0.0623217	-0.0374752
195	P14550	AKR1A1	Alcohol dehydrogenase [NADP(+)] OS=Homo sapiens GN=AKR1A1 PE=1 SV=3	AKR1A1 (22)	AKR1A1 (24)	AKR1A1 (22;24)	Both		22	24		3.54797	0.564362	0.0780613		0.600273	0.587504	0.119065		0.607667	0.380693	0.166557		1.33493	0.249001	0.266011		0.147947	1	0.0713098		0.0179355	1	-0.00569135		0.220882	0.961797	-0.0434434		0.888905	1	-0.0813338			0.0135687	-0.0136889	0.0810961	0.169378	0.235147
2806	Q68DU8	KCTD16	BTB/POZ domain-containing protein KCTD16 OS=Homo sapiens GN=KCTD16 PE=1 SV=1	KCTD16 (3)	KCTD16 (2)	KCTD16 (3;2)	Both		3	2		0.885192	0.4811	-0.114845		0.717253	0.635126	-0.0882108		0.00459507	0.994837	0.00109435		3.72309	0.216428	0.265909		0.542292	1	-0.124402		0.0899286	1	-0.0311501		1.37176	1	-0.172908		0.604138	1	-0.128028			0.0212821	-0.0215872	-0.14939	-0.123524	-0.0647739
595	P12694	BCKDHA	2-oxoisovalerate dehydrogenase subunit alpha, mitochondrial OS=Homo sapiens GN=BCKDHA PE=1 SV=2	BCKDHA (9)	BCKDHA (7)	BCKDHA (9;7)	Both	Mitochondrion-Mtx	9	7		0.203889	0.922901	-0.0141586		1.06849	0.665793	0.0712603		1.97837	0.325787	0.163027		2.95137	0.220027	0.26584		0.464103	1	-0.0469876		0.14962	1	0.0635678		1.66981	0.964579	-0.0691094		0.228298	1	0.0354661			-0.0554747	0.053387	-0.0219557	0.0882795	0.141381
716	Q8TCD1	C18orf32	UPF0729 protein C18orf32 OS=Homo sapiens GN=C18orf32 PE=3 SV=1	C18orf32 (2)	C18orf32 (1)	C18orf32 (2;1)	Both		2	1		0.449432	0.479301	0.12091		0.530186	0.279429	0.347501		0.161219	0.542309	0.119361		0.350993	0.315407	0.265802		0.0235654	1	0.0187564		0.264931	1	0.19659		0.137733	0.966802	-0.103749		0.201508	1	0.150569			-0.0483492	0.0467522	0.0347073	0.529446	0.342441
6030	Q8IY95	TMEM192	Transmembrane protein 192 OS=Homo sapiens GN=TMEM192 PE=1 SV=1	TMEM192 (4)	TMEM192 (5)	TMEM192 (4;5)	Both	Lysosome	4	5		0.105979	0.903764	0.0199427		2.92713	0.280951	-0.258061		2.67959	0.259947	0.203089		0.94228	0.251426	0.265582		0.121079	1	-0.04166		1.16463	1	-0.0693791		0.311487	0.964361	-0.0662823		0.584187	1	-0.131387			-0.00653412	0.00650038	0.0743042	-0.275916	0.215282
6686	Q9C0D7	ZC3H12C	Probable ribonuclease ZC3H12C OS=Homo sapiens GN=ZC3H12C PE=1 SV=2	ZC3H12C (2)	ZC3H12C (1)	ZC3H12C (2;1)	Both		2	1		0.0926074	0.586226	-0.113872		0.171951	0.34361	-0.428969		0.477475	0.278537	-0.230527		1.06308	0.231698	0.265324		0.620148	1	0.352265		0.0866841	1	-0.172987		0.563886	0.964634	0.0692447		0.286037	1	-0.206495			-0.270317	0.227439	-0.488884	-1.20196	-0.392599
5170	Q8WU76	SCFD2	Sec1 family domain-containing protein 2 OS=Homo sapiens GN=SCFD2 PE=1 SV=2	SCFD2 (5)	SCFD2 (5)	SCFD2 (5;5)	Both	ER-Membrane	5	5		0.945183	0.465426	-0.11431		0.419799	0.839761	0.0337493		0.0573731	0.971438	0.00581072		2.49782	0.219529	0.265215		0.454851	1	0.0744453		0.051017	1	0.00850848		1.41223	0.960197	-0.0484636		2.2416	1	-0.124254			-0.069465	0.0662323	-0.0787475	0.0310185	0.0160426
4160	O95394	PGM3	Phosphoacetylglucosamine mutase OS=Homo sapiens GN=PGM3 PE=1 SV=1	PGM3 (12)	PGM3 (10)	PGM3 (12;10)	Both		12	10		0.0932514	0.908799	-0.0200736		0.275513	0.909568	-0.0205913		2.64293	0.204253	0.252158		3.21699	0.220114	0.264698		0.344613	1	-0.033563		0.576485	1	-0.0366006		0.923412	0.981027	-0.114868		0.0338401	1	-0.00258928			0.00852642	-0.00857158	-0.0840729	0.00164476	0.234857
3441	Q9Y2R9	MRPS7	28S ribosomal protein S7, mitochondrial OS=Homo sapiens GN=MRPS7 PE=1 SV=2	MRPS7 (5)	MRPS7 (6)	MRPS7 (5;6)	Both	Mitochondrion-Mtx	5	6		0.254548	0.512707	0.111553		0.093817	0.704738	0.0868592		0.00749404	0.990753	-0.00212446		1.22298	0.229821	0.264189		0.749423	1	-0.287897		0.876501	1	-0.208432		0.466522	0.977534	-0.13067		1.14799	1	-0.0795406			-0.221787	0.192077	-0.0284754	-0.194425	-0.029163
92	O96019	ACTL6A	Actin-like protein 6A OS=Homo sapiens GN=ACTL6A PE=1 SV=1	ACTL6A (13)	ACTL6A (10)	ACTL6A (13;10)	Both		13	10		0.178873	0.909686	0.0170391		0.0112739	0.989416	0.00365155		0.662624	0.300812	0.211438		0.292193	0.33815	0.264122		0.102379	1	-0.0303917		0.22544	1	-0.0650982		0.195704	1	-0.175366		0.12043	1	0.217842			0.0717871	-0.0754979	0.0213245	-0.0861801	0.121634
1596	Q9H2P9	DPH5	Diphthine methyl ester synthase OS=Homo sapiens GN=DPH5 PE=1 SV=2	DPH5 (5)	DPH5 (3)	DPH5 (5;3)	Both		5	3		1.12832	0.244608	0.250167		1.49008	0.22757	0.377663		0.673141	0.203459	0.311911		0.629116	0.27366	0.263788		0.100111	1	0.0431279		0.276955	1	-0.112914		0.372739	1	-0.144675		0.302781	1	-0.117691			-0.0973911	0.0911743	0.186581	0.314648	0.184772
4469	P32119	PRDX2	Peroxiredoxin-2 OS=Homo sapiens GN=PRDX2 PE=1 SV=5	PRDX2 (23)	PRDX2 (21)	PRDX2 (23;21)	Both		23	21		0.503944	0.722444	-0.0485443		1.27722	0.556278	0.1129		0.636351	0.696275	-0.0563063		0.437536	0.302627	0.263121		0.132809	1	0.0289562		0.353888	1	-0.0637813		0.262506	0.993785	-0.151179		0.0979892	1	0.107826			-0.0527931	0.0508977	-0.0310107	0.124697	-0.0632955
1308	P17812	CTPS1	CTP synthase 1 OS=Homo sapiens GN=CTPS1 PE=1 SV=2	CTPS1 (22)	CTPS1 (21)	CTPS1 (22;21)	Both		22	21		0.0163568	0.990673	0.00158823		1.03223	0.723809	0.0571657		1.75145	0.475795	0.102841		0.661944	0.278171	0.262567		0.382401	1	0.123172		0.0547797	1	0.0107901		0.332633	0.976017	-0.112567		0.0906478	1	-0.0488682			0.0437884	-0.0451302	-0.0202271	0.0527858	0.112624
5875	Q99426	TBCB	Tubulin-folding cofactor B OS=Homo sapiens GN=TBCB PE=1 SV=2	TBCB (13)	TBCB (6)	TBCB (13;6)	Both		13	6		0.725733	0.239475	0.297506		1.54659	0.217278	0.426971		0.41211	0.306766	0.214039		0.145866	0.407764	0.262483		0.0288552	1	0.0199019		0.22147	1	-0.116594		0.277485	1	-0.500039		0.0693876	1	-0.140631			0.16979	-0.192341	0.1595	0.344916	0.0409619
4831	Q9P258	RCC2	Protein RCC2 OS=Homo sapiens GN=RCC2 PE=1 SV=2	RCC2 (18)	RCC2 (13)	RCC2 (18;13)	Both		18	13		1.75457	0.494704	-0.0994629		0.159827	0.757111	-0.0624731		1.19033	0.177328	0.317933		3.15631	0.219656	0.262457		0.46623	1	0.0881386		0.195741	1	-0.0331696		0.83918	0.965421	-0.0777442		0.55698	1	0.0126164			-0.0460285	0.0445776	-0.105361	0.0560464	0.369325
3936	Q9BZF3	OSBPL6	Oxysterol-binding protein-related protein 6 OS=Homo sapiens GN=OSBPL6 PE=1 SV=1	OSBPL6 (5)	OSBPL6 (5)	OSBPL6 (5;5)	Both		5	5		0.359195	0.666236	0.0680695		0.0685094	0.965405	-0.00814341		2.38381	0.309909	0.172451		3.36452	0.220546	0.262247		0.459188	1	-0.0581631		0.325742	1	-0.0324089		0.671581	0.983435	0.12849		0.0334476	1	0.0131503			-0.0376284	0.0366489	0.125202	0.0255784	0.187485
1146	Q9Y2B0	CNPY2	Protein canopy homolog 2 OS=Homo sapiens GN=CNPY2 PE=1 SV=1	CNPY2 (4)	CNPY2 (4)	CNPY2 (4;4)	Both	ER-Lumen	4	4		1.0519	0.280159	0.209486		0.0718634	0.89794	0.0243815		1.74892	0.119806	0.371079		0.41693	0.297317	0.262078		0.432913	1	0.187972		0.574095	1	0.101886		0.00868136	0.996137	-0.00612777		0.136372	1	0.101102			0.109059	-0.117905	0.179413	0.096558	0.327069
4407	Q5SGD2	PPM1L	Protein phosphatase 1L OS=Homo sapiens GN=PPM1L PE=1 SV=1	PPM1L (7)	PPM1L (5)	PPM1L (7;5)	Both		7	5		0.469507	0.401731	-0.16967		0.426269	0.780791	-0.0487268		0.0862041	0.893903	-0.0232585		1.2944	0.241956	0.261783		0.250966	1	-0.0771264		0.0138963	1	0.00393576		0.743111	0.985065	-0.119815		0.255679	1	-0.0410644			0.0188683	-0.0191061	-0.0667563	-0.0135281	0.0557872
2953	Q8NC56	LEMD2	LEM domain-containing protein 2 OS=Homo sapiens GN=LEMD2 PE=1 SV=1	LEMD2 (11)	LEMD2 (7)	LEMD2 (11;7)	Both	ER-Membrane	11	7		2.47754	0.183942	0.328642		0.0818131	0.861787	-0.0356667		1.87977	0.148333	0.327002		1.36392	0.233085	0.261209		0.0969028	1	-0.0144184		0.2631	1	-0.0381262		0.344416	0.962772	0.0621232		0.285167	1	-0.0499795			0.0828723	-0.0878672	0.306402	-0.165107	0.280349
5020	Q8N5L8	RPP25L	Ribonuclease P protein subunit p25-like protein OS=Homo sapiens GN=RPP25L PE=1 SV=1	RPP25L (2)	RPP25L (2)	RPP25L (2;2)	Both		2	2		0.469742	0.246089	0.299172		0.101754	0.786927	-0.051036		0.55987	0.213341	0.295398		0.328188	0.315173	0.261012		0.225429	1	-0.140789		0.182282	1	-0.188523		0.107121	0.971369	-0.106901		0.0840937	1	0.0721803			-0.0311528	0.030475	0.0868949	0.0644451	0.117134
2305	Q9BRR8	GPATCH1	G patch domain-containing protein 1 OS=Homo sapiens GN=GPATCH1 PE=1 SV=1	GPATCH1 (4)	GPATCH1 (1)	GPATCH1 (4;1)	Both	Nuclear (100% filter)	4	1		0.142007	0.79792	0.0427301		0.43224	0.565895	0.12962		0.174515	0.508691	-0.131287		0.563582	0.288536	0.260916		0.260536	1	0.197231		0.179077	1	0.143699		0.137096	0.962723	-0.056827		0.13736	1	0.0653643			-0.0576312	0.0553827	0.132843	0.0392665	0.0975067
3571	P55209	NAP1L1	Nucleosome assembly protein 1-like 1 OS=Homo sapiens GN=NAP1L1 PE=1 SV=1	NAP1L1 (26)	NAP1L1 (18)	NAP1L1 (26;18)	Both		26	18		1.24497	0.662715	0.060684		1.78874	0.696717	0.0626662		0.779509	0.393962	0.154877		2.90637	0.226795	0.260831		0.193029	1	0.0283019		0.663564	1	-0.126309		0.633817	1	-0.149474		0.331191	1	-0.0143262			-0.0205477	0.0202465	0.0736106	0.0717347	0.199602
4604	Q15185	PTGES3	Prostaglandin E synthase 3 OS=Homo sapiens GN=PTGES3 PE=1 SV=1	PTGES3 (8)	PTGES3 (7)	PTGES3 (8;7)	Both		8	7		0.000655567	0.999502	-0.000176362		0.660246	0.387337	0.22115		0.714266	0.457564	0.124721		0.236393	0.354776	0.260748		1.19229	1	0.235981		0.0633175	1	0.0109369		0.14837	0.99287	-0.166643		0.0327967	1	0.0559389			-0.0108938	0.0108053	-0.0743826	0.304492	0.0782539
2531	P51991	HNRNPA3	Heterogeneous nuclear ribonucleoprotein A3 OS=Homo sapiens GN=HNRNPA3 PE=1 SV=2	HNRNPA3 (24)	HNRNPA3 (21)	HNRNPA3 (24;21)	Both		24	21		0.998863	0.578604	-0.0828102		0.0297227	0.955347	-0.0113572		0.59531	0.41045	0.151381		0.352046	0.32582	0.260724		0.0881202	1	-0.0358158		0.135577	1	-0.0417951		0.318355	1	-0.230646		0.0693039	1	0.0816016			0.021245	-0.021549	-0.103759	-0.12025	0.0854173
282	P39687	ANP32A	Acidic leucine-rich nuclear phosphoprotein 32 family member A OS=Homo sapiens GN=ANP32A PE=1 SV=1	ANP32A (11)	ANP32A (15)	ANP32A (11;15)	Both		11	15		0.459231	0.624706	-0.0696211		0.0104828	0.990072	0.0028983		0.0651115	0.907313	0.0185353		0.670807	0.266579	0.260373		0.283746	1	0.0682578		0.0564855	1	-0.020016		0.174985	0.973341	0.0735695		0.265193	1	-0.103073			-0.159927	0.143868	-0.0874182	0.0628041	0.0872733
676	Q9NW68	BSDC1	BSD domain-containing protein 1 OS=Homo sapiens GN=BSDC1 PE=1 SV=1	BSDC1 (9)	BSDC1 (7)	BSDC1 (9;7)	Both	Golgi	9	7		0.595185	0.470845	-0.125668		0.237366	0.764729	0.0574452		0.525603	0.63786	0.0745494		3.54769	0.219825	0.26001		0.436214	1	0.0898965		0.0516197	1	0.0132689		0.977875	0.966485	-0.0712028		0.744707	1	0.0625395			-0.0476423	0.0460902	-0.184769	0.131494	0.116811
6113	Q5JTV8	TOR1AIP1	Torsin-1A-interacting protein 1 OS=Homo sapiens GN=TOR1AIP1 PE=1 SV=2	TOR1AIP1 (8)	TOR1AIP1 (4)	TOR1AIP1 (8;4)	Both	Nuclear (100% filter)	8	4		0.17134	0.925371	0.0148307		0.464934	0.731363	-0.0634717		3.21447	0.348215	0.147537		0.400327	0.315268	0.259684		0.0652982	1	0.0332616		0.172938	1	-0.0395587		0.191865	0.975638	-0.120427		0.010586	1	-0.00812306			-0.0194378	0.0191674	0.0406909	-0.104022	0.139818
4411	P62140	PPP1CB	Serine/threonine-protein phosphatase PP1-beta catalytic subunit OS=Homo sapiens GN=PPP1CB PE=1 SV=3	PPP1CB (7)	PPP1CB (3)	PPP1CB (7;3)	Both		7	3		0.0249457	0.927144	-0.0177085		1.66355	0.212593	0.417148		0.630448	0.276979	0.228788		0.262657	0.347887	0.259585		0.111586	1	0.132581		0.179049	1	-0.149727		0.400918	1	-0.396189		0.102921	1	-0.128797			0.11645	-0.126598	-0.220228	0.476721	0.333176
5121	Q15424	SAFB	Scaffold attachment factor B1 OS=Homo sapiens GN=SAFB PE=1 SV=4	SAFB (15)	SAFB (13)	SAFB (15;13)	Both		15	13		1.39871	0.214763	-0.309534		0.410011	0.569808	0.115581		0.025239	0.96785	-0.00703966		1.18848	0.235766	0.259422		0.727634	1	0.127558		1.03636	1	-0.0540491		0.285908	0.979558	-0.0246095		0.0185284	0.999045	0.0014901			-0.1612	0.144898	-0.300517	0.18225	-0.00215733
2208	O95749	GGPS1	Geranylgeranyl pyrophosphate synthase OS=Homo sapiens GN=GGPS1 PE=1 SV=1	GGPS1 (5)	GGPS1 (10)	GGPS1 (5;10)	Both		5	10		0.581188	0.854984	-0.0269665		0.41073	0.638437	0.0953632		0.491183	0.665532	0.0713629		4.29875	0.22003	0.259285		0.394091	1	-0.053848		0.559172	1	-0.0880793		1.05977	0.9759	-0.10467		1.39926	1	-0.107084			-0.0107996	0.0107127	-0.0127445	0.162621	0.112321
6189	Q15642	TRIP10	Cdc42-interacting protein 4 OS=Homo sapiens GN=TRIP10 PE=1 SV=3	TRIP10 (5)	TRIP10 (5)	TRIP10 (5;5)	Both		5	5		0.349666	0.686044	0.0636618		0.200273	0.88557	0.0284044		0.594068	0.194743	0.33891		3.64743	0.219553	0.259158		0.00452661	1	-0.00370178		0.0287802	1	-0.0214331		1.28871	0.968506	0.0823627		0.37233	1	0.0914879			-0.026141	0.0256595	0.00861823	0.0717753	0.19424
87	Q9H6R3	ACSS3	Acyl-CoA synthetase short-chain family member 3, mitochondrial OS=Homo sapiens GN=ACSS3 PE=1 SV=1	ACSS3 (4)	ACSS3 (2)	ACSS3 (4;2)	Both		4	2		0.589738	0.726179	0.0481439		0.305507	0.69229	-0.0739833		0.956863	0.592622	-0.0769511		2.57973	0.224193	0.258914		0.988453	1	0.26204		1.60542	1	0.226077		0.0397377	0.992339	-0.0183148		0.121301	1	-0.0931875			0.06748	-0.0707458	0.0387094	-0.150399	-0.0770514
4258	P51178	PLCD1	1-phosphatidylinositol 4,5-bisphosphate phosphodiesterase delta-1 OS=Homo sapiens GN=PLCD1 PE=1 SV=2	PLCD1 (7)	PLCD1 (9)	PLCD1 (7;9)	Both		7	9		0.231187	0.82899	0.0331664		0.11915	0.804368	0.0521722		0.35179	0.681678	0.0672338		0.354349	0.326803	0.25884		0.673879	1	-0.149692		0.663065	1	-0.181913		0.133827	0.965169	-0.0958145		0.0671091	1	-0.0525194			-0.0458505	0.0444103	0.0768373	-0.0799431	0.125491
6465	P46939	UTRN	Utrophin OS=Homo sapiens GN=UTRN PE=1 SV=2	UTRN (17)	UTRN (8)	UTRN (17;8)	Both	Actin binding proteins	17	8		0.114128	0.949104	0.00990467		0.708994	0.712703	-0.0654934		2.03285	0.194952	0.274448		1.09966	0.258544	0.258315		1.0676	1	-0.081131		0.0568298	1	0.011913		0.648602	0.979005	-0.119054		0.652182	1	-0.0920116			-0.00395646	0.00394316	0.0352572	-0.0397995	0.255268
209	P00352	ALDH1A1	Retinal dehydrogenase 1 OS=Homo sapiens GN=ALDH1A1 PE=1 SV=2	ALDH1A1 (10)	ALDH1A1 (8)	ALDH1A1 (10;8)	Both		10	8		0.501854	0.483667	0.116023		0.447825	0.757212	0.0509473		0.409681	0.357047	0.183942		0.795022	0.261777	0.257938		0.546185	1	0.280806		0.462355	1	0.219201		0.0425213	0.995189	0.0138926		0.385677	1	-0.123867			0.103296	-0.111193	0.185906	0.0378229	0.0458113
3408	Q9H9J2	MRPL44	39S ribosomal protein L44, mitochondrial OS=Homo sapiens GN=MRPL44 PE=1 SV=1	MRPL44 (9)	MRPL44 (6)	MRPL44 (9;6)	Both	Mitochondrion-Mtx	9	6		0.218843	0.923016	0.0140793		0.348022	0.619695	0.103796		0.207141	0.666555	0.0760072		0.411268	0.314844	0.257824		0.0944741	1	0.0574881		0.193448	1	0.0730107		0.284466	1	-0.190313		0.200047	1	-0.119182			0.0319667	-0.0326701	0.00504745	0.193666	0.187931
2062	Q14315	FLNC	Filamin-C OS=Homo sapiens GN=FLNC PE=1 SV=3	FLNC (77)	FLNC (73)	FLNC (77;73)	Both		77	73		2.4055	0.604765	0.0707443		2.22684	0.798246	-0.040866		4.85035	0.208334	0.240457		1.06158	0.266385	0.257585		0.0701353	1	-0.0129266		0.163765	1	0.0063921		0.483429	0.961091	0.062155		0.211009	1	-0.0656706			-0.00471486	0.00469642	0.077053	-0.0371633	0.245342
3739	Q9UFN0	NIPSNAP3A	Protein NipSnap homolog 3A OS=Homo sapiens GN=NIPSNAP3A PE=1 SV=2	NIPSNAP3A (13)	NIPSNAP3A (7)	NIPSNAP3A (13;7)	Both		13	7		2.5827	0.433901	0.120213		0.451771	0.38728	0.235531		0.818781	0.364473	0.166637		0.67248	0.286074	0.257311		0.143595	1	0.0247213		0.388183	1	-0.0616416		0.355741	0.977566	-0.110743		0.139454	1	-0.0434691			0.00810441	-0.008145	0.109903	0.0884924	0.120031
1418	Q08345	DDR1	Epithelial discoidin domain-containing receptor 1 OS=Homo sapiens GN=DDR1 PE=1 SV=1	DDR1 (6)	DDR1 (2)	DDR1 (6;2)	Both	Plasma membrane	6	2		0.449269	0.388416	0.175608		0.287157	0.544236	0.15454		0.154474	0.845525	0.0324311		0.653557	0.282794	0.256951		0.417719	1	-0.196652		0.349427	1	-0.0862246		0.839012	1	-0.35671		0.178531	1	-0.0861157			0.00367866	-0.00368565	0.0587247	-0.0111899	-0.0309935
1416	Q5TDH0	DDI2	Protein DDI1 homolog 2 OS=Homo sapiens GN=DDI2 PE=1 SV=1	DDI2 (5)	DDI2 (9)	DDI2 (5;9)	Both		5	9		0.711283	0.631029	0.0701209		0.879814	0.58723	0.110165		2.38567	0.408089	0.125061		0.891888	0.269458	0.256781		0.385468	1	0.0935888		0.0252926	1	0.00481619		0.188702	0.963393	-0.043907		0.0236515	1	-0.00839134			-0.000601291	0.00060061	0.0994642	0.0758364	0.131285
6009	Q9BVC6	TMEM109	Transmembrane protein 109 OS=Homo sapiens GN=TMEM109 PE=1 SV=1	TMEM109 (4)	TMEM109 (3)	TMEM109 (4;3)	Both	ER-Membrane	4	3		0.0830118	0.892916	0.020633		0.0884629	0.912244	0.0204187		0.200114	0.752675	-0.0475431		0.517177	0.286504	0.256743		0.0903561	1	0.0367563		0.414873	1	-0.107497		0.00186258	1	0.00105827		0.384436	1	-0.202312			-0.17269	0.154118	-0.0237214	-0.0019386	-0.0998002
6015	O75204	TMEM127	Transmembrane protein 127 OS=Homo sapiens GN=TMEM127 PE=1 SV=1	TMEM127 (2)	TMEM127 (1)	TMEM127 (2;1)	Both		2	1		0.809736	0.204612	0.367784		0.752007	0.554846	0.118921		0.236741	0.396284	0.184115		1.32283	0.238684	0.256696		0.21141	1	-0.164556		0.190934	1	-0.148954		0.0359915	0.996043	0.00707781		0.240863	1	0.13307			0.0433751	-0.044691	0.25463	0.0685943	-0.055674
6309	P0DN76	U2AF1L5	Splicing factor U2AF 35 kDa subunit-like protein OS=Homo sapiens GN=U2AF1L5 PE=1 SV=1	U2AF1L5 (6)	U2AF1L5 (8)	U2AF1L5 (6;8)	Both		6	8		0.123729	0.528599	-0.119106		0.558015	0.287189	0.329312		0.539552	0.249433	0.247931		0.198946	0.360231	0.256543		0.195427	1	0.272979		0.0803221	1	-0.124764		0.0775513	0.973533	-0.130996		0.349785	1	-0.457454			0.193667	-0.223603	-0.426798	0.45829	0.240962
2586	P56937	HSD17B7	3-keto-steroid reductase OS=Homo sapiens GN=HSD17B7 PE=1 SV=1	HSD17B7 (10)	HSD17B7 (7)	HSD17B7 (10;7)	Both		10	7		0.87265	0.244494	0.274717		1.15158	0.350543	0.215661		0.481075	0.433715	0.133558		1.69612	0.229573	0.256459		0.0449601	1	-0.0213571		0.00131191	1	0.000723678		0.895696	1	0.25196		0.257609	1	-0.118998			0.0184483	-0.0186753	0.360865	0.268215	0.217286
6662	Q96MU7	YTHDC1	YTH domain-containing protein 1 OS=Homo sapiens GN=YTHDC1 PE=1 SV=3	YTHDC1 (6)	YTHDC1 (8)	YTHDC1 (6;8)	Both		6	8		0.400839	0.662497	-0.0617515		0.235745	0.855357	0.0303854		0.526421	0.341652	0.185647		0.377693	0.320415	0.256457		0.230834	1	-0.0971536		0.395836	1	-0.136295		0.341147	1	-0.232804		0.0287175	1	0.0232338			-0.0801789	0.0759098	-0.108184	0.0534052	0.0786061
346	P07741	APRT	Adenine phosphoribosyltransferase OS=Homo sapiens GN=APRT PE=1 SV=2	APRT (10)	APRT (5)	APRT (10;5)	Both		10	5		0.851076	0.746418	0.0441576		0.515754	0.408803	0.216324		1.81506	0.308497	0.177473		0.715915	0.281909	0.256402		0.118575	1	0.0515145		0.368327	1	-0.0545666		0.346801	0.974736	-0.101191		0.417539	1	-0.12535			0.011051	-0.0111294	0.037681	0.0997841	0.201137
6079	Q9BVT8	TMUB1	Transmembrane and ubiquitin-like domain-containing protein 1 OS=Homo sapiens GN=TMUB1 PE=1 SV=1	TMUB1 (2)	TMUB1 (1)	TMUB1 (2;1)	Both		2	1		0.0275935	0.946256	-0.0109294		0.312888	0.542709	0.135662		0.923451	0.204402	-0.274865		0.808346	0.248237	0.256374		0.335808	1	-0.0440188		0.725203	1	-0.254711		0.575141	1	-0.139076		0.253452	1	-0.198497			-0.251132	0.213704	-0.0569969	0.00196958	-0.331808
1811	P07099	EPHX1	Epoxide hydrolase 1 OS=Homo sapiens GN=EPHX1 PE=1 SV=1	EPHX1 (7)	EPHX1 (6)	EPHX1 (7;6)	Both	ER-Membrane	7	6		0.379381	0.445008	-0.14303		0.528678	0.5934	0.102712		0.398093	0.336397	-0.201385		1.66661	0.229357	0.256358		0.143526	1	-0.102733		0.108671	1	-0.0693596		1.07353	1	-0.237905		0.143781	1	0.0280079			-0.130238	0.119376	-0.262365	0.0403951	-0.357493
3333	Q8IVH4	MMAA	Methylmalonic aciduria type A protein, mitochondrial OS=Homo sapiens GN=MMAA PE=1 SV=1	MMAA (1)	MMAA (1)	MMAA (1;1)	Both		1	1		0.0221074	0.97683	0.0042485		0.319072	0.620838	-0.101697		0.250685	0.475898	0.136048		0.212092	0.37004	0.256199		0.0108725	1	0.00793202		0.391277	1	-0.221939		0.143165	1	-0.201565		0.169902	1	-0.208532			0.0320267	-0.0327329	-0.0468789	-0.201071	-0.0315012
1170	Q96MW5	COG8	Conserved oligomeric Golgi complex subunit 8 OS=Homo sapiens GN=COG8 PE=1 SV=2	COG8 (9)	COG8 (3)	COG8 (9;3)	Both		9	3		0.0692538	0.919628	0.0164362		0.808437	0.563994	0.112176		0.270445	0.628752	0.0802649		2.16522	0.228119	0.256139		0.14233	1	0.0538776		0.316786	1	0.0950095		0.0429561	0.995643	0.00987668		0.0874132	1	-0.0149385			-0.018844	0.0185892	-0.0501005	0.0686276	0.170221
3679	P20929	NEB	Nebulin OS=Homo sapiens GN=NEB PE=1 SV=5	NEB (3)	NEB (4)	NEB (3;4)	Both		3	4		0.101162	0.904514	-0.0188502		0.0244587	0.974097	0.00686565		0.224927	0.632988	-0.0826614		0.390445	0.319058	0.256038		0.0467655	1	-0.0183055		0.0690372	1	-0.0266296		0.168084	0.973445	-0.111092		0.0353444	1	0.029027			-0.0680455	0.0649397	0.0302524	0.0818007	0.0290135
3726	Q96IV0	NGLY1	Peptide-N(4)-(N-acetyl-beta-glucosaminyl)asparagine amidase OS=Homo sapiens GN=NGLY1 PE=1 SV=1	NGLY1 (4)	NGLY1 (6)	NGLY1 (4;6)	Both		4	6		0.153243	0.673988	0.0734172		0.300495	0.668486	0.0867192		0.404456	0.430525	0.148527		0.464698	0.311026	0.255905		0.141645	1	-0.057649		0.23248	1	-0.080818		0.419803	1	-0.225693		0.0617969	1	0.0412986			0.0316384	-0.0323272	-0.0723848	-0.000974525	0.0415464
6100	O75674	TOM1L1	TOM1-like protein 1 OS=Homo sapiens GN=TOM1L1 PE=1 SV=2	TOM1L1 (2)	TOM1L1 (3)	TOM1L1 (2;3)	Both		2	3		0.176548	0.837255	-0.0323883		0.302303	0.770155	-0.0540136		2.48568	0.227407	0.229634		1.13655	0.252844	0.255694		0.16884	1	-0.0413157		0.471553	1	-0.0783426		0.268591	0.977234	-0.114433		0.623324	1	-0.114566			0.0504422	-0.0522364	0.0228732	-0.109894	0.208928
3474	Q9UDX5	MTFP1	Mitochondrial fission process protein 1 OS=Homo sapiens GN=MTFP1 PE=1 SV=1	MTFP1 (2)	MTFP1 (2)	MTFP1 (2;2)	Both		2	2		0.459113	0.413774	0.162986		1.70995	0.635907	0.0794711		0.538192	0.299382	0.226288		0.794087	0.278456	0.255392		0.0904316	1	0.034489		0.0412174	1	-0.0162459		0.136295	0.96924	0.0336163		0.394423	1	0.138528			-0.0343031	0.0334852	0.263825	0.0765212	0.339311
4329	P06746	POLB	DNA polymerase beta OS=Homo sapiens GN=POLB PE=1 SV=3	POLB (16)	POLB (9)	POLB (16;9)	Both		16	9		0.273075	0.937249	-0.0127808		0.433855	0.861663	-0.0329853		2.40838	0.214531	0.252609		5.53734	0.219528	0.255363		0.769175	1	-0.027137		0.28152	1	-0.0411225		0.651553	0.965026	-0.0552951		0.474426	1	-0.0712569			-0.0118702	0.0117659	-0.0272944	-0.05533	0.261991
5633	P30626	SRI	Sorcin OS=Homo sapiens GN=SRI PE=1 SV=1	SRI (11)	SRI (8)	SRI (11;8)	Both		11	8		0.0328596	0.976009	0.00419276		0.534405	0.507535	0.156102		0.582398	0.288089	0.229693		0.546194	0.29876	0.255211		0.0268905	1	0.0115545		0.124016	1	-0.044015		0.256027	0.973569	-0.106361		0.135101	1	-0.0569558			0.0503434	-0.0521304	-0.0285212	0.238924	0.122314
4355	P0CAP2	POLR2M	DNA-directed RNA polymerase II subunit GRINL1A OS=Homo sapiens GN=POLR2M PE=1 SV=1	POLR2M (4)	POLR2M (1)	POLR2M (4;1)	Both		4	1		0.335845	0.51818	0.107483		0.045492	0.952154	-0.0118832		1.03221	0.444643	0.11567		1.89236	0.229375	0.255067		0.221918	1	0.125323		0.204084	1	0.0371994		0.706264	1	-0.138232		0.361165	1	-0.113898			-0.0193405	0.0190727	0.00568211	-0.0833586	0.0991547
1021	Q8N4Q1	CHCHD4	Mitochondrial intermembrane space import and assembly protein 40 OS=Homo sapiens GN=CHCHD4 PE=1 SV=1	CHCHD4 (3)	CHCHD4 (3)	CHCHD4 (3;3)	Both	Mitochondrion-Mtx	3	3		3.88041	0.371001	0.146228		0.335848	0.873956	-0.0307295		0.437968	0.63656	0.0797248		0.775878	0.285132	0.254766		0.203926	1	0.0344795		0.0177009	1	0.00352545		0.176003	0.963178	-0.0580344		0.232806	1	-0.0953149			0.0069749	-0.00700429	0.141899	-0.0582526	0.131406
2232	Q04760	GLO1	Lactoylglutathione lyase OS=Homo sapiens GN=GLO1 PE=1 SV=4	GLO1 (9)	GLO1 (9)	GLO1 (9;9)	Both		9	9		0.085797	0.815558	-0.041372		0.0370182	0.944445	0.0154668		0.236455	0.488483	0.132713		0.311851	0.341058	0.254411		0.174521	1	0.106106		0.127751	1	0.0857935		0.0452491	0.964679	-0.0430355		0.00462693	1	-0.00651731			-0.0341	0.0332918	0.100639	0.134041	0.303787
6221	P43897	TSFM	Elongation factor Ts, mitochondrial OS=Homo sapiens GN=TSFM PE=1 SV=2	TSFM (2)	TSFM (5)	TSFM (2;5)	Both	Mitochondrion-Mtx	2	5		0.54922	0.370914	-0.174256		1.60159	0.376088	0.194235		0.0767766	0.937753	-0.0120042		0.360819	0.327864	0.254383		0.785877	1	-0.153196		0.415352	1	-0.128541		0.252595	1	-0.17442		0.0238511	1	0.0179598			-0.078296	0.0742189	-0.0806005	0.187475	-0.0429175
4146	P07737	PFN1	Profilin-1 OS=Homo sapiens GN=PFN1 PE=1 SV=2	PFN1 (31)	PFN1 (21)	PFN1 (31;21)	Both		31	21		0.015589	0.98416	0.00275127		0.324184	0.616821	0.102598		0.752705	0.431157	0.127097		1.02463	0.252749	0.254269		0.140265	1	-0.0352822		0.340214	1	-0.0971198		0.408681	0.970722	-0.0887202		0.0380927	1	-0.0120904			-0.0552287	0.0531589	-0.0394283	0.0028823	0.0734628
2183	Q9NZC3	GDE1	Glycerophosphodiester phosphodiesterase 1 OS=Homo sapiens GN=GDE1 PE=1 SV=1	GDE1 (4)	GDE1 (3)	GDE1 (4;3)	Both	ER-Membrane	4	3		0.989328	0.258525	0.241313		0.347688	0.673421	-0.0761444		0.458277	0.443768	0.13258		0.314384	0.34025	0.2542		0.034153	1	-0.0234402		0.0249596	1	0.0080949		0.392809	1	-0.317692		0.150396	1	0.178154			0.0961695	-0.102973	0.308357	-0.145653	0.0405036
1255	Q96SW2	CRBN	Protein cereblon OS=Homo sapiens GN=CRBN PE=1 SV=1	CRBN (8)	CRBN (4)	CRBN (8;4)	Both		8	4		0.695788	0.337178	-0.191784		0.230395	0.652901	0.0939534		0.297899	0.626644	0.0807662		0.822992	0.269292	0.254146		0.318105	1	0.147065		0.415646	1	0.11427		0.772633	1	-0.238806		0.16599	1	-0.061302			0.0460739	-0.0475635	-0.115444	0.21811	0.163466
3909	Q5SWX8	ODR4	Protein odr-4 homolog OS=Homo sapiens GN=ODR4 PE=1 SV=1	ODR4 (5)	ODR4 (7)	ODR4 (5;7)	Both	ER-Membrane	5	7		0.890255	0.525071	0.0913325		0.0934539	0.897828	0.0263436		2.74069	0.103262	0.40449		0.765262	0.276312	0.253993		0.562789	1	-0.165257		0.233922	1	-0.0532594		0.0542604	0.991299	-0.0164007		0.124588	1	0.0362067			-0.00385049	0.00383784	0.0594092	0.107803	0.374066
2432	O00165	HAX1	HCLS1-associated protein X-1 OS=Homo sapiens GN=HAX1 PE=1 SV=2	HAX1 (2)	HAX1 (3)	HAX1 (2;3)	Both	Mitochondrion-Mtx	2	3		0.371991	0.488376	-0.113978		0.0593707	0.893049	0.0275796		0.0364942	0.886216	0.0282306		1.23003	0.237023	0.253861		0.0650858	1	-0.0487003		0.0284929	1	-0.0280956		0.166466	0.972668	-0.0300797		0.178102	1	-0.104515			0.0581577	-0.060562	-0.0286973	-0.10601	0.240015
5685	O95630	STAMBP	STAM-binding protein OS=Homo sapiens GN=STAMBP PE=1 SV=1	STAMBP (4)	STAMBP (6)	STAMBP (4;6)	Both		4	6		3.26844	0.243962	0.237745		0.234076	0.808471	-0.0468882		1.8377	0.495053	0.0982439		0.7116	0.286226	0.253617		0.134838	1	0.0568207		0.544419	1	-0.149312		0.387913	0.978634	-0.114977		0.169802	1	-0.0638297			0.00639868	-0.00642304	0.244179	-0.108952	0.0989413
3956	Q5BKU9	OXLD1	Oxidoreductase-like domain-containing protein 1 OS=Homo sapiens GN=OXLD1 PE=2 SV=1	OXLD1 (1)	OXLD1 (1)	OXLD1 (1;1)	Both		1	1		0.170219	0.785213	0.0444063		0.709901	0.443267	-0.178423		0.100181	0.956484	0.00906918		0.729488	0.280993	0.25358		0.384407	1	0.0722259		0.259048	1	-0.097669		0.354407	0.978932	-0.124881		0.0654093	1	-0.0264864			0.0313248	-0.0319994	0.122659	-0.249445	0.00138328
1011	Q9Y281	CFL2	Cofilin-2 OS=Homo sapiens GN=CFL2 PE=1 SV=1	CFL2 (11)	CFL2 (7)	CFL2 (11;7)	Both	Plasma membrane	11	7		0.141455	0.862296	-0.0262874		0.392501	0.591399	0.114446		0.127017	0.755355	-0.0562784		2.38356	0.227675	0.253403		0.138808	1	0.0649725		0.144031	1	-0.0639726		0.430818	0.971394	-0.0923965		0.269598	1	0.0363887			-0.029275	0.0286745	-0.0802042	0.0231687	0.075508
3579	O43776	NARS	Asparagine--tRNA ligase, cytoplasmic OS=Homo sapiens GN=NARS PE=1 SV=1	NARS (26)	NARS (27)	NARS (26;27)	Both		26	27		0.488167	0.594942	0.0871869		0.105955	0.884505	0.0306299		0.481088	0.338019	0.198696		0.787995	0.28628	0.253142		0.0743109	1	0.0364627		0.0658609	1	0.0288331		0.524779	0.981502	0.117358		0.0990042	1	0.0375138			-0.00422181	0.00420658	0.136578	0.11716	0.312391
1681	E9PRY8	EEF1D	Elongation factor 1-delta OS=Homo sapiens GN=EEF1D PE=1 SV=1	EEF1D (22)	EEF1D (19)	EEF1D (22;19)	Both		22	19		0.0377079	0.968725	-0.00570466		0.219809	0.850286	0.031698		0.129393	0.858513	-0.0280055		1.03071	0.251456	0.252411		0.238219	1	0.0533834		0.0893794	1	0.0178442		0.0370279	0.995192	-0.00903049		0.141547	1	-0.0432292			-0.0815672	0.0771534	-0.0093485	0.00418651	-0.0883289
27	O14678	ABCD4	ATP-binding cassette sub-family D member 4 OS=Homo sapiens GN=ABCD4 PE=1 SV=1	ABCD4 (2)	ABCD4 (2)	ABCD4 (2;2)	Both		2	2		0.0700671	0.686427	0.0825868		0.659738	0.5289	-0.145577		1.1989	0.240609	0.248938		1.34709	0.254741	0.252188		0.0886128	1	0.0527928		0.325731	1	0.0374628		0.805827	0.977616	0.105693		0.873084	1	-0.103787			-0.023702	0.0233041	-0.263928	-0.201204	0.213655
4359	Q9NVU0	POLR3E	DNA-directed RNA polymerase III subunit RPC5 OS=Homo sapiens GN=POLR3E PE=1 SV=1	POLR3E (2)	POLR3E (3)	POLR3E (2;3)	Both		2	3		0.0271655	0.946319	0.0122444		1.56022	0.621124	-0.0831719		1.66565	0.330418	0.165195		0.401976	0.327594	0.250408		0.131876	1	-0.0468791		0.00136484	1	-0.000350866		0.00918379	0.995979	0.00812276		0.258189	1	-0.151977			-0.0421925	0.0409679	0.139483	-0.0717657	0.139876
2420	Q16836	HADH	Hydroxyacyl-coenzyme A dehydrogenase, mitochondrial OS=Homo sapiens GN=HADH PE=1 SV=3	HADH (17)	HADH (18)	HADH (17;18)	Both	Mitochondrion-Mtx	17	18		1.26875	0.572443	0.0777232		0.881023	0.668821	-0.0718801		2.44597	0.295805	0.179414		1.06793	0.261971	0.250069		0.252492	1	-0.0153073		0.248595	1	-0.0323465		0.220493	0.963373	0.0408898		0.483856	1	-0.0877046			-0.00813583	0.00808525	0.0886113	-0.0969291	0.190808
2470	Q5GLZ8	HERC4	Probable E3 ubiquitin-protein ligase HERC4 OS=Homo sapiens GN=HERC4 PE=1 SV=1	HERC4 (6)	HERC4 (8)	HERC4 (6;8)	Both		6	8		0.155141	0.855527	-0.0288158		1.4082	0.610803	0.0878102		1.56304	0.475056	0.104836		2.77746	0.22917	0.249978		0.5666	1	-0.109539		0.7836	1	-0.0940785		1.25692	1	-0.147802		0.299309	1	-0.0515879			-0.0414371	0.0402549	0.0261773	0.077668	0.10165
6249	Q86WT1	TTC30A	Tetratricopeptide repeat protein 30A OS=Homo sapiens GN=TTC30A PE=2 SV=3	TTC30A (1)	TTC30A (3)	TTC30A (1;3)	Both		1	3		0.290471	0.670958	0.0687818		0.154651	0.806554	0.0504116		4.42405	0.204305	0.243995		2.2385	0.238714	0.249791		1.11792	1	-0.252454		0.229376	1	-0.0172499		0.975433	0.97219	-0.0921286		0.550009	1	-0.13805			0.0243573	-0.0247598	0.140599	-0.0488294	0.249662
3853	Q9H1E3	NUCKS1	Nuclear ubiquitous casein and cyclin-dependent kinase substrate 1 OS=Homo sapiens GN=NUCKS1 PE=1 SV=1	NUCKS1 (7)	NUCKS1 (4)	NUCKS1 (7;4)	Both		7	4		1.21685	0.415203	-0.13187		0.22984	0.882613	-0.0257279		0.376781	0.496252	0.115564		1.17519	0.250654	0.249778		0.12567	1	-0.0420315		0.234954	1	-0.0730602		0.117024	0.972706	-0.0275758		0.582517	1	-0.115937			-0.0614751	0.0589257	-0.105859	-0.0206298	0.20875
3430	Q9BYN8	MRPS26	28S ribosomal protein S26, mitochondrial OS=Homo sapiens GN=MRPS26 PE=1 SV=1	MRPS26 (4)	MRPS26 (2)	MRPS26 (4;2)	Both	Mitochondrion-Mtx	4	2		0.122313	0.743864	0.0555946		0.122094	0.920206	0.0180788		0.214041	0.731246	0.0550175		1.75137	0.233954	0.249723		0.0548146	1	0.0144413		0.722076	1	-0.211463		0.815433	0.984806	-0.1261		0.343606	1	-0.163562			-0.0050839	0.0050627	0.188631	-0.00287187	-0.0239912
4565	P43686	PSMC4	26S protease regulatory subunit 6B OS=Homo sapiens GN=PSMC4 PE=1 SV=2	PSMC4 (30)	PSMC4 (31)	PSMC4 (30;31)	Both	Proteasome	30	31		0.168259	0.897877	-0.0188524		0.58881	0.737482	0.0548585		0.162278	0.90953	0.0169368		2.31528	0.229293	0.249466		0.16416	1	0.0297512		0.243355	1	-0.0404133		0.0283585	1	0.00137512		0.290971	1	-0.0355822			-0.07208	0.0686069	-0.0380642	0.0384354	0.0153946
846	Q8N4T8	CBR4	Carbonyl reductase family member 4 OS=Homo sapiens GN=CBR4 PE=1 SV=3	CBR4 (2)	CBR4 (2)	CBR4 (2;2)	Both	Mitochondrion-Mtx	2	2		0.64372	0.744274	0.044373		0.00664667	0.985218	0.00520703		1.3698	0.35945	0.15074		0.491788	0.31259	0.249261		0.85906	1	0.139223		0.141382	1	0.0451209		0.0963305	0.96373	-0.0495877		0.20995	1	0.174541			0.0661119	-0.0692425	0.0564118	-0.213381	0.119068
1751	Q15717	ELAVL1	ELAV-like protein 1 OS=Homo sapiens GN=ELAVL1 PE=1 SV=2	ELAVL1 (16)	ELAVL1 (13)	ELAVL1 (16;13)	Both		16	13		0.668373	0.807168	0.0333648		0.0019517	0.997981	0.000447508		0.56783	0.457437	0.127832		2.03199	0.236742	0.248837		0.294577	1	-0.0613931		0.209409	1	-0.049723		0.340374	0.967262	-0.0529082		0.138961	1	0.0122513			-0.0473685	0.0458338	0.040097	-0.0625828	0.0636954
1910	Q8TC76	FAM110B	Protein FAM110B OS=Homo sapiens GN=FAM110B PE=1 SV=1	FAM110B (1)	FAM110B (1)	FAM110B (1;1)	Both		1	1		0.711484	0.807369	0.0343315		0.833521	0.403235	0.206793		0.320255	0.421797	-0.158197		0.493123	0.314792	0.24848		0.20622	1	0.183621		0.1083	1	0.0611462		0.590387	1	-0.320056		0.19313	1	-0.110773			-0.0128378	0.0127164	0.0192318	0.153062	-0.306525
258	Q9P2R3	ANKFY1	Rabankyrin-5 OS=Homo sapiens GN=ANKFY1 PE=1 SV=2	ANKFY1 (17)	ANKFY1 (13)	ANKFY1 (17;13)	Both	Endosome	17	13		0.579756	0.410421	0.159275		0.117807	0.936547	-0.0150313		1.35481	0.491709	0.0996433		2.22672	0.233988	0.248385		0.110981	1	-0.0155831		0.407856	1	-0.0699928		0.806714	1	-0.177064		0.312028	1	0.0626643			-0.0205492	0.020248	0.0822714	0.0206	0.0779747
5217	O75396	SEC22B	Vesicle-trafficking protein SEC22b OS=Homo sapiens GN=SEC22B PE=1 SV=4	SEC22B (10)	SEC22B (10)	SEC22B (10;10)	Both	ER_high_curvature	10	10		0.0359729	0.985475	-0.00250142		0.810465	0.584371	-0.109016		1.96106	0.356016	0.148659		1.18925	0.263161	0.248324		0.139537	1	-0.0205154		0.0556276	1	-0.0130731		0.160588	0.964512	0.0358994		0.310746	1	0.0699617			-0.0136043	0.0134685	0.0120709	-0.146004	0.166651
2681	C9J406	IMMT	MICOS complex subunit MIC60 OS=Homo sapiens GN=IMMT PE=1 SV=1	IMMT (8)	IMMT (7)	IMMT (8;7)	Both		8	7		0.261293	0.491149	-0.119999		0.438902	0.591285	0.103748		0.294594	0.541881	-0.095911		0.857141	0.253246	0.247954		0.030264	1	0.00949727		0.193173	1	-0.0607036		0.218425	0.963437	0.0608914		0.208196	1	-0.0993034			-0.119773	0.110519	0.00864114	0.119662	-0.0184854
4372	O75817	POP7	Ribonuclease P protein subunit p20 OS=Homo sapiens GN=POP7 PE=1 SV=2	POP7 (1)	POP7 (1)	POP7 (1;1)	Both		1	1		0.289178	0.83317	0.02937		0.044056	0.952682	0.0120846		0.0758321	0.928632	-0.0146851		0.354893	0.340084	0.247528		0.379917	1	0.106642		0.0656869	1	0.0354412		0.295043	1	-0.202881		0.329874	1	-0.226706			-0.0445683	0.0432057	0.0540944	0.08845	-0.0699569
2610	P10809	HSPD1	60 kDa heat shock protein, mitochondrial OS=Homo sapiens GN=HSPD1 PE=1 SV=2	HSPD1 (118)	HSPD1 (102)	HSPD1 (118;102)	Both	Mitochondrion-Mtx	118	102		1.00677	0.686636	0.061306		0.8013	0.930026	-0.0169621		0.797969	0.43236	0.139134		1.43664	0.275672	0.247067		0.0723966	1	0.00886302		0.00749641	1	0.0011123		0.994684	0.967924	-0.076625		0.190894	1	-0.0369673			0.00218871	-0.00219057	0.0718538	-0.0223052	0.174903
3731	P14543	NID1	Nidogen-1 OS=Homo sapiens GN=NID1 PE=1 SV=3	NID1 (11)	NID1 (11)	NID1 (11;11)	Both		11	11		0.517282	0.548466	0.0919629		0.848948	0.592494	-0.100544		0.137713	0.577414	-0.111558		1.55743	0.245619	0.246793		0.379721	1	0.314755		0.396117	1	0.317867		0.857432	1	-0.219263		0.323973	1	-0.232152			0.0663676	-0.0695234	0.146006	-0.0657067	-0.358052
2315	P43304	GPD2	Glycerol-3-phosphate dehydrogenase, mitochondrial OS=Homo sapiens GN=GPD2 PE=1 SV=3	GPD2 (12)	GPD2 (8)	GPD2 (12;8)	Both	Mitochondrion-IM	12	8		0.853799	0.572159	-0.0787185		0.823416	0.64457	-0.0781015		0.585279	0.459545	0.120923		1.7174	0.239388	0.246703		0.21081	1	-0.0650588		0.178239	1	-0.0611248		0.263085	0.965256	-0.0358557		0.802792	1	-0.140062			-0.0931508	0.0874455	-0.0609034	-0.0577261	0.0558577
2439	Q9Y3Q4	HCN4	Potassium/sodium hyperpolarization-activated cyclic nucleotide-gated channel 4 OS=Homo sapiens GN=HCN4 PE=1 SV=1	HCN4 (3)	HCN4 (1)	HCN4 (3;1)	Both		3	1		2.12249	0.331549	-0.167384		1.18002	0.531186	-0.126409		0.292574	0.702451	0.0622772		0.653986	0.296943	0.246663		0.181056	1	0.0391292		0.306153	1	-0.0672186		0.0338158	0.994751	0.0133273		0.0551426	1	0.0247418			0.0622524	-0.0650181	-0.156427	-0.15881	0.127355
2205	O75223	GGCT	Gamma-glutamylcyclotransferase OS=Homo sapiens GN=GGCT PE=1 SV=1	GGCT (9)	GGCT (6)	GGCT (9;6)	Both		9	6		0.000970801	0.997488	-0.000627473		0.752317	0.284118	0.322301		0.364935	0.32177	0.218966		0.353887	0.340055	0.246423		0.0836118	1	-0.0512437		0.418444	1	-0.256471		0.269569	1	-0.185975		0.0837202	1	-0.0667258			0.00314128	-0.00314615	-0.180042	0.207501	0.0361755
3407	Q9Y6G3	MRPL42	39S ribosomal protein L42, mitochondrial OS=Homo sapiens GN=MRPL42 PE=1 SV=1	MRPL42 (3)	MRPL42 (3)	MRPL42 (3;3)	Both		3	3		0.785668	0.366986	0.168793		0.040447	0.949753	-0.0136628		1.60392	0.174102	0.298125		0.380038	0.336606	0.246324		0.73056	1	-0.144499		0.778022	1	-0.126787		0.176293	0.976388	-0.111376		0.010456	1	-0.00766729			0.0829324	-0.0879345	0.229872	-0.11024	0.25134
6295	O95881	TXNDC12	Thioredoxin domain-containing protein 12 OS=Homo sapiens GN=TXNDC12 PE=1 SV=1	TXNDC12 (8)	TXNDC12 (4)	TXNDC12 (8;4)	Both	ER-Lumen	8	4		0.646598	0.388652	0.169782		0.0872468	0.871212	-0.0341394		0.562047	0.311664	0.212913		0.386153	0.338982	0.246093		0.0612153	1	-0.0398203		0.137978	1	-0.0812438		0.0536898	0.970211	-0.0348911		0.0667111	1	0.0516924			-0.0190956	0.0188342	0.102843	-0.150352	0.112696
4622	P43378	PTPN9	Tyrosine-protein phosphatase non-receptor type 9 OS=Homo sapiens GN=PTPN9 PE=1 SV=1	PTPN9 (6)	PTPN9 (4)	PTPN9 (6;4)	Both	Endosome	6	4		0.472043	0.72418	0.0482169		0.646039	0.34115	0.260672		0.0502922	0.965338	-0.00719288		0.388974	0.334941	0.24606		0.47664	1	-0.0492455		0.259725	1	0.0591107		0.294566	1	-0.180726		0.160177	1	0.0993483			-0.0655086	0.0626239	0.0705915	0.149621	-0.0398958
6186	Q9C026	TRIM9	E3 ubiquitin-protein ligase TRIM9 OS=Homo sapiens GN=TRIM9 PE=1 SV=1	TRIM9 (3)	TRIM9 (1)	TRIM9 (3;1)	Both		3	1		0.557414	0.619112	-0.0700733		3.01388	0.224	-0.531253		1.64528	0.132478	0.353437		1.29275	0.248821	0.246001		0.557698	1	-0.39135		1.08336	1	-0.344702		0.93201	1	-0.282376		0.805773	1	-0.402356			0.00870319	-0.00875048	-0.0852288	-0.512924	0.294413
2640	Q9Y5U9	IER3IP1	Immediate early response 3-interacting protein 1 OS=Homo sapiens GN=IER3IP1 PE=1 SV=1	IER3IP1 (2)	IER3IP1 (4)	IER3IP1 (2;4)	Both	Ergic/cisGolgi	2	4		0.0325151	0.946424	-0.0119345		0.0881096	0.952758	0.0118608		1.28132	0.459315	0.116738		0.495236	0.319245	0.245823		0.330948	1	0.0278155		0.226585	1	-0.0437403		0.107949	0.964056	0.0498509		0.0387399	1	0.0184611			-0.0123271	0.0122151	-0.116832	0.051484	0.135815
4880	O43665	RGS10	Regulator of G-protein signaling 10 OS=Homo sapiens GN=RGS10 PE=1 SV=2	RGS10 (2)	RGS10 (1)	RGS10 (2;1)	Both		2	1		0.562062	0.633538	0.0667821		1.27592	0.385591	0.190001		0.577955	0.257283	0.260108		0.500391	0.314576	0.245567		0.177912	1	-0.0726822		0.397957	1	-0.166505		0.360299	1	-0.170981		0.127191	1	-0.0889667			-0.010315	0.0102353	0.0305262	0.14631	0.134025
3015	O75427	LRCH4	Leucine-rich repeat and calponin homology domain-containing protein 4 OS=Homo sapiens GN=LRCH4 PE=1 SV=2	LRCH4 (1)	LRCH4 (5)	LRCH4 (1;5)	Both		1	5		0.169125	0.412807	0.204003		0.507258	0.592231	0.101821		1.19537	0.266221	0.208417		0.636611	0.285223	0.245443		0.360713	1	-0.0466316		0.521589	1	-0.0702364		0.133398	0.964114	-0.0912343		0.126257	1	0.0562661			0.162147	-0.182583	0.566661	0.146651	0.242825
4280	O60664	PLIN3	Perilipin-3 OS=Homo sapiens GN=PLIN3 PE=1 SV=3	PLIN3 (12)	PLIN3 (12)	PLIN3 (12;12)	Both		12	12		0.00494553	0.997049	0.000585728		0.145754	0.919042	0.0180248		2.12314	0.230725	0.225942		2.13364	0.236634	0.245283		0.674096	1	0.0572246		0.625133	1	-0.056641		0.203872	0.964608	0.0387369		0.247747	1	-0.0327151			-0.0571646	0.0549514	-0.00512144	-0.00931501	0.24876
3531	P14649	MYL6B	Myosin light chain 6B OS=Homo sapiens GN=MYL6B PE=1 SV=1	MYL6B (12)	MYL6B (6)	MYL6B (12;6)	Both	Actin binding proteins	12	6		1.75242	0.540754	0.0857769		1.46334	0.616593	0.0886228		3.20356	0.364927	0.140694		1.843	0.251199	0.244986		0.590796	1	0.0231587		0.183159	1	0.0258023		0.0611413	0.997477	-0.00438684		0.234822	1	0.0240584			-0.00343816	0.00342784	0.0733319	0.0734686	0.14376
4186	P46020	PHKA1	Phosphorylase b kinase regulatory subunit alpha, skeletal muscle isoform OS=Homo sapiens GN=PHKA1 PE=1 SV=2	PHKA1 (1)	PHKA1 (1)	PHKA1 (1;1)	Both		1	1		0.919748	0.590069	-0.0799603		0.084659	0.93055	0.0183622		0.10547	0.85162	0.0339562		0.534692	0.31503	0.244546		0.106129	1	-0.035344		0.043134	1	0.042409		0.480336	1	-0.198316		0.211849	1	-0.0899114			-0.0290802	0.0284877	-0.103542	-0.0458833	-0.0625178
3456	P26038	MSN	Moesin OS=Homo sapiens GN=MSN PE=1 SV=3	MSN (34)	MSN (27)	MSN (34;27)	Both	Plasma membrane	34	27		0.230082	0.931584	-0.0122652		0.273001	0.897891	0.0233417		1.00993	0.316924	0.188685		0.497502	0.319996	0.244454		0.0274896	0.999626	-0.00416794		0.116966	1	-0.0167706		0.228659	0.972741	-0.10179		0.233674	1	0.156544			0.014152	-0.0142831	-0.00459719	-0.00243475	0.231466
4762	Q9H6Z4	RANBP3	Ran-binding protein 3 OS=Homo sapiens GN=RANBP3 PE=1 SV=1	RANBP3 (14)	RANBP3 (11)	RANBP3 (14;11)	Both		14	11		0.075334	0.899623	-0.0226157		1.14255	0.272879	0.345502		4.74938	0.108728	0.376965		4.69079	0.228787	0.244119		0.19881	1	0.184923		2.70433	1	-0.169034		0.487863	1	-0.190401		0.118606	1	-0.0261902			0.00284849	-0.0028524	-0.111161	0.390224	0.375083
920	Q08722	CD47	Leukocyte surface antigen CD47 OS=Homo sapiens GN=CD47 PE=1 SV=1	CD47 (1)	CD47 (2)	CD47 (1;2)	Both	Plasma membrane	1	2		0.995549	0.210803	-0.331639		0.0216055	0.953419	0.010925		0.668744	0.260613	-0.230654		0.959897	0.253224	0.244115		0.360891	1	0.122432		0.335778	1	-0.113598		0.163648	0.963976	-0.0458967		0.304929	1	-0.222392			-0.271487	0.228266	-0.242894	0.125303	-0.345736
6729	Q96NC0	ZMAT2	Zinc finger matrin-type protein 2 OS=Homo sapiens GN=ZMAT2 PE=1 SV=1	ZMAT2 (4)	ZMAT2 (3)	ZMAT2 (4;3)	Both		4	3		1.3926	0.551752	0.0831867		0.0864087	0.834242	0.0443301		0.839579	0.277995	0.223997		1.41687	0.253541	0.244003		0.722476	1	-0.170342		0.780817	1	-0.181335		1.35013	1	-0.318173		0.191242	1	0.0242092			0.0416216	-0.0428305	0.0773466	-0.108245	0.28861
1731	P38919	EIF4A3	Eukaryotic initiation factor 4A-III OS=Homo sapiens GN=EIF4A3 PE=1 SV=4	EIF4A3 (30)	EIF4A3 (32)	EIF4A3 (30;32)	Both		30	32		0.0718755	0.970127	-0.00517952		0.599529	0.843449	-0.032868		2.27985	0.321503	0.164211		2.90625	0.231449	0.243984		0.0600211	1	-0.015537		0.208055	1	-0.0625247		0.667451	0.966181	-0.0715748		0.123098	1	0.0419379			-0.0539754	0.0519963	-0.0154864	-0.0327785	0.146886
6267	P68366	TUBA4A	Tubulin alpha-4A chain OS=Homo sapiens GN=TUBA4A PE=1 SV=1	TUBA4A (10)	TUBA4A (50)	TUBA4A (10;50)	Both		10	50		0.38145	0.462648	0.130606		1.56839	0.223333	0.387735		1.60649	0.194956	0.267397		0.302967	0.34876	0.243874		0.230632	1	0.220032		0.0600416	1	0.0470536		0.21341	1	-0.171551		0.0731766	1	-0.0797805			0.135147	-0.149029	0.0200518	0.449859	0.306756
1322	Q13618	CUL3	Cullin-3 OS=Homo sapiens GN=CUL3 PE=1 SV=2	CUL3 (23)	CUL3 (21)	CUL3 (23;21)	Both		23	21		1.74703	0.312915	-0.179394		1.65303	0.437684	0.161547		0.442895	0.772287	0.0422058		0.37262	0.340564	0.243505		0.103178	1	-0.0297479		0.543396	1	-0.144214		0.240705	0.997435	-0.152254		0.121678	1	0.104352			-0.0630288	0.0603527	-0.206918	0.160495	0.0579374
421	F8W8Y7	ARMCX4	Armadillo repeat-containing X-linked protein 4 OS=Homo sapiens GN=ARMCX4 PE=1 SV=3	ARMCX4 (6)	ARMCX4 (2)	ARMCX4 (6;2)	Both		6	2		0.45941	0.804282	0.0396778		0.219253	0.756366	0.0620494		0.753185	0.459241	0.127766		1.82132	0.268626	0.243282		1.11437	1	-0.260646		0.476833	1	-0.0656212		0.730216	1	-0.159405		0.167632	1	0.0207856			0.00720097	-0.00723234	0.0153259	-0.024399	0.090963
1122	Q8IY22	CMIP	C-Maf-inducing protein OS=Homo sapiens GN=CMIP PE=1 SV=3	CMIP (3)	CMIP (1)	CMIP (3;1)	Both		3	1		0.611613	0.193164	-0.503912		0.247612	0.850247	0.0331693		0.402145	0.565884	0.0951391		0.339871	0.348395	0.243006		0.419912	1	0.102453		0.145267	1	0.0480103		0.468107	1	-0.332958		0.0814472	1	0.0716261			-0.0112006	0.0111071	-0.296233	0.0720505	0.0217018
632	Q9NSY1	BMP2K	BMP-2-inducible protein kinase OS=Homo sapiens GN=BMP2K PE=1 SV=2	BMP2K (3)	BMP2K (5)	BMP2K (3;5)	Both		3	5		0.345083	0.670842	0.0634221		0.894468	0.277217	0.353227		0.166269	0.818164	0.0390082		0.684966	0.297467	0.242916		0.0546362	1	-0.0190656		0.315891	1	0.0972964		0.450041	1	-0.150643		0.590944	1	0.21052			-0.0574297	0.0551964	0.119543	0.442757	-0.0327977
4301	Q92871	PMM1	Phosphomannomutase 1 OS=Homo sapiens GN=PMM1 PE=1 SV=2	PMM1 (5)	PMM1 (5)	PMM1 (5;5)	Both		5	5		0.104709	0.836286	0.0346742		1.06156	0.445193	0.164957		0.59693	0.579295	0.0853971		2.52055	0.236627	0.24268		0.00462348	0.998237	-0.000778439		0.228336	1	-0.033059		0.735895	0.969104	-0.0882711		0.338858	1	0.0448704			-0.0722766	0.0687852	-0.0646825	0.121194	0.128803
1274	P05813	CRYBA1	Beta-crystallin A3 OS=Homo sapiens GN=CRYBA1 PE=1 SV=4	CRYBA1 (4)	CRYBA1 (2)	CRYBA1 (4;2)	Both		4	2		1.60289	0.367167	0.153515		0.13435	0.916167	0.0193251		0.807708	0.129815	0.425111		0.507625	0.315621	0.242403		0.204319	1	-0.0929099		0.362509	1	-0.14574		0.190102	0.967955	0.0848144		0.0100861	1	-0.00505923			-0.00771951	0.00767354	0.150318	-0.0185045	0.300336
2939	Q14847	LASP1	LIM and SH3 domain protein 1 OS=Homo sapiens GN=LASP1 PE=1 SV=2	LASP1 (11)	LASP1 (9)	LASP1 (11;9)	Both		11	9		0.202578	0.668949	0.0685965		0.634434	0.28683	0.319699		0.177096	0.590735	0.0996764		0.290152	0.355542	0.242243		0.0817825	1	-0.0527868		0.5037	1	-0.288596		0.348508	1	-0.298866		0.0496651	1	-0.0500551			0.0610166	-0.0636706	-0.0370723	0.18117	-0.0743574
1889	P15311	EZR	Ezrin OS=Homo sapiens GN=EZR PE=1 SV=4	EZR (28)	EZR (22)	EZR (28;22)	Both		28	22		1.86363	0.487945	0.102513		0.878799	0.628412	-0.0876243		3.12075	0.171994	0.28308		1.05642	0.278305	0.242181		0.499071	1	-0.041562		0.656469	1	-0.0588882		0.845176	1	-0.186752		0.347231	1	0.0634672			0.00763249	-0.00766833	0.103172	-0.117313	0.29912
94	P12814	ACTN1	Alpha-actinin-1 OS=Homo sapiens GN=ACTN1 PE=1 SV=2	ACTN1 (33)	ACTN1 (28)	ACTN1 (33;28)	Both	Actin binding proteins	33	28		0.592672	0.704626	0.0516828		0.524662	0.649163	0.081764		0.528297	0.499337	0.10828		2.3334	0.236892	0.242154		0.290618	1	-0.0600968		0.634007	1	-0.165167		0.3709	0.968274	-0.0930964		0.367765	1	-0.10141			-0.0719855	0.0685211	0.0530714	0.0319749	0.0434959
3191	Q96RQ3	MCCC1	Methylcrotonoyl-CoA carboxylase subunit alpha, mitochondrial OS=Homo sapiens GN=MCCC1 PE=1 SV=3	MCCC1 (6)	MCCC1 (9)	MCCC1 (6;9)	Both	Mitochondrion-Mtx	6	9		0.0156868	0.991919	0.00135245		0.549908	0.898048	-0.0219581		0.227761	0.772398	0.0499083		0.462332	0.329345	0.242039		0.0958107	1	0.0273517		0.245869	1	-0.0542573		0.23897	0.978668	-0.115277		0.0612101	1	-0.0508471			0.0341834	-0.0349907	-0.0205145	-0.0199682	-0.0177176
4071	Q13442	PDAP1	28 kDa heat- and acid-stable phosphoprotein OS=Homo sapiens GN=PDAP1 PE=1 SV=1	PDAP1 (8)	PDAP1 (8)	PDAP1 (8;8)	Both		8	8		0.173156	0.692341	0.0666076		0.162714	0.833997	-0.0412684		0.155503	0.785821	0.0483397		0.581423	0.314674	0.241961		0.21936	1	0.0700364		0.24403	1	-0.0784682		0.143736	0.96427	0.0552963		0.0202189	1	0.0101934			0.0319931	-0.0326978	0.183752	-0.118773	0.142651
6106	O94826	TOMM70	Mitochondrial import receptor subunit TOM70 OS=Homo sapiens GN=TOMM70 PE=1 SV=1	TOMM70 (24)	TOMM70 (22)	TOMM70 (24;22)	Both	Mitochondrion-OM	24	22		0.653006	0.814466	-0.0320604		1.64335	0.623398	0.0830004		0.378461	0.853012	-0.0274407		0.692591	0.303102	0.241795		0.570487	1	0.0406592		0.00307921	1	-0.000495313		0.1069	0.972909	-0.0308578		0.027098	1	-0.00974282			-0.0358569	0.0349655	-0.0394971	0.0750807	-0.00704931
572	O75531	BANF1	Barrier-to-autointegration factor OS=Homo sapiens GN=BANF1 PE=1 SV=1	BANF1 (6)	BANF1 (6)	BANF1 (6;6)	Both		6	6		1.16669	0.322525	0.182181		0.833266	0.661158	-0.0733311		1.13654	0.211063	0.270048		0.484553	0.320612	0.241704		0.124863	1	0.0747721		0.00185719	1	-0.00129873		0.166996	0.963277	0.0879925		0.196591	1	0.0924058			-0.0947212	0.0888288	0.13574	-0.0610702	0.207896
6314	Q9UBT2	UBA2	SUMO-activating enzyme subunit 2 OS=Homo sapiens GN=UBA2 PE=1 SV=2	UBA2 (31)	UBA2 (28)	UBA2 (31;28)	Both		31	28		0.438112	0.761103	-0.0465983		0.80038	0.744609	0.0558494		1.21579	0.310164	0.190587		0.52293	0.321582	0.241569		0.551753	1	0.120967		0.166989	1	-0.0344909		0.328194	0.976962	-0.133353		0.0177389	1	-0.0140948			0.0232848	-0.0236516	-0.0792103	0.0763922	0.159969
150	P35573	AGL	Glycogen debranching enzyme OS=Homo sapiens GN=AGL PE=1 SV=3	AGL (15)	AGL (13)	AGL (15;13)	Both		15	13		0.516111	0.606642	-0.0728696		0.615246	0.540344	0.130544		0.0577922	0.959378	-0.0087691		1.41677	0.249741	0.241129		1.70683	1	0.0777545		0.365139	1	-0.0175178		0.444648	1	-0.139552		0.662919	1	-0.110073			-0.110244	0.102352	-0.110327	0.193812	-0.00356099
4708	Q9H2M9	RAB3GAP2	Rab3 GTPase-activating protein non-catalytic subunit OS=Homo sapiens GN=RAB3GAP2 PE=1 SV=1	RAB3GAP2 (32)	RAB3GAP2 (16)	RAB3GAP2 (32;16)	Both		32	16		1.51841	0.640201	0.0644336		0.718067	0.581376	0.119702		2.51491	0.330481	0.16242		3.85365	0.233861	0.240962		0.476663	1	0.0449876		0.453162	1	-0.0415733		0.20193	0.99514	0.00610416		0.0354717	0.999201	-0.0040493			0.0133247	-0.0134406	0.0753042	0.0795121	0.173093
2985	Q12907	LMAN2	Vesicular integral-membrane protein VIP36 OS=Homo sapiens GN=LMAN2 PE=1 SV=1	LMAN2 (9)	LMAN2 (11)	LMAN2 (9;11)	Both	Ergic/cisGolgi	9	11		0.310898	0.876213	-0.0218706		0.0121713	0.98995	-0.00315641		0.469262	0.642578	0.0729054		0.760976	0.296037	0.240925		0.446554	1	-0.111909		0.553571	1	-0.0899365		0.332542	0.965807	-0.0858153		0.0307692	1	-0.00850803			-0.0534496	0.051508	-0.00981941	-0.075156	0.0241174
4563	P35998	PSMC2	26S protease regulatory subunit 7 OS=Homo sapiens GN=PSMC2 PE=1 SV=3	PSMC2 (26)	PSMC2 (26)	PSMC2 (26;26)	Both	Proteasome	26	26		0.636395	0.925402	0.013596		0.0434	0.994298	-0.00162738		1.79523	0.762286	0.0431019		0.733267	0.305784	0.24081		0.248689	1	0.0397016		0.023915	1	-0.00299716		0.295474	0.965225	-0.0714166		0.0818944	1	0.0450789			-0.0184071	0.0181638	0.0147896	0.00698089	0.0446823
5846	Q13148	TARDBP	TAR DNA-binding protein 43 OS=Homo sapiens GN=TARDBP PE=1 SV=1	TARDBP (12)	TARDBP (9)	TARDBP (12;9)	Both		12	9		3.40691	0.312255	-0.175446		2.05839	0.647767	-0.0763235		0.616232	0.443948	0.134603		0.909833	0.291723	0.240786		0.217299	1	-0.040301		0.0798181	1	-0.0173923		0.970284	1	-0.209725		0.0638528	1	0.0382068			-0.0152413	0.0150723	-0.171791	-0.0771189	0.191342
2064	Q14254	FLOT2	Flotillin-2 OS=Homo sapiens GN=FLOT2 PE=1 SV=2	FLOT2 (15)	FLOT2 (10)	FLOT2 (15;10)	Both		15	10		0.196774	0.930256	0.0125845		1.42686	0.693693	0.0633311		2.18133	0.380113	0.136584		3.25344	0.234772	0.240715		0.284111	1	0.123435		0.0302823	1	-0.00279827		0.474658	0.963077	-0.0544484		2.01427	1	-0.0663117			-0.00429322	0.00427757	0.0282757	0.0592114	0.121113
3250	Q7Z7M0	MEGF8	Multiple epidermal growth factor-like domains protein 8 OS=Homo sapiens GN=MEGF8 PE=1 SV=2	MEGF8 (2)	MEGF8 (4)	MEGF8 (2;4)	Both		2	4		0.0531848	0.928109	-0.014032		0.466341	0.670933	0.07289		0.334013	0.714656	-0.0542849		1.20547	0.253058	0.240694		0.164201	1	-0.03891		0.825131	1	0.0917261		0.575622	0.977994	-0.126152		0.360482	1	0.0682893			0.145581	-0.161828	0.043801	0.0540528	-0.0452004
1381	P11182	DBT	Lipoamide acyltransferase component of branched-chain alpha-keto acid dehydrogenase complex, mitochondrial OS=Homo sapiens GN=DBT PE=1 SV=3	DBT (10)	DBT (10)	DBT (10;10)	Both	Mitochondrion-Mtx	10	10		0.745055	0.864467	0.0233865		0.146545	0.842685	-0.0399617		0.635425	0.505762	0.110168		0.952756	0.290479	0.240529		0.109057	1	0.0174455		0.00443932	1	-0.00088964		0.530643	0.978507	-0.118962		0.134404	1	-0.0639188			-0.0011629	0.00116128	0.0303654	-0.122854	0.0642655
5398	P05141	SLC25A5	ADP/ATP translocase 2 OS=Homo sapiens GN=SLC25A5 PE=1 SV=7	SLC25A5 (4)	SLC25A5 (4)	SLC25A5 (4;4)	Both	Mitochondrion-IM	4	4		0.171845	0.839178	-0.0324953		0.373261	0.442112	0.20557		1.11603	0.287472	0.207751		0.213011	0.387409	0.240253		0.151485	1	0.0488197		0.702228	1	-0.144962		0.217401	1	-0.244008		0.106397	1	0.156667			-0.047066	0.0455504	-0.0905126	0.367522	0.248173
1473	Q86XP1	DGKH	Diacylglycerol kinase eta OS=Homo sapiens GN=DGKH PE=1 SV=1	DGKH (2)	DGKH (1)	DGKH (2;1)	Both		2	1		0.26279	0.847131	0.0269095		0.26514	0.712492	-0.0702504		1.72095	0.36544	0.143201		2.34112	0.240156	0.240158		0.514141	1	0.0609573		0.0345307	1	-0.00645696		0.133691	0.965102	-0.0432348		0.182275	1	-0.0354331			-0.0141654	0.0140186	0.0487109	0.010473	0.155014
2549	Q9BUJ2	HNRNPUL1	Heterogeneous nuclear ribonucleoprotein U-like protein 1 OS=Homo sapiens GN=HNRNPUL1 PE=1 SV=2	HNRNPUL1 (21)	HNRNPUL1 (22)	HNRNPUL1 (21;22)	Both		21	22		0.999109	0.525088	-0.0936677		0.155425	0.896233	0.0259831		0.987737	0.454611	0.11865		3.39027	0.234045	0.240059		0.273358	1	0.058991		0.117664	1	0.0127807		0.541831	0.960136	-0.0519209		0.78729	1	-0.0954271			-0.041446	0.0402631	-0.0670964	0.0761638	0.0859902
3347	Q7L1V2	MON1B	Vacuolar fusion protein MON1 homolog B OS=Homo sapiens GN=MON1B PE=1 SV=1	MON1B (2)	MON1B (2)	MON1B (2;2)	Both	Endosome	2	2		0.644126	0.246902	0.27595		0.313149	0.56643	-0.128131		0.590622	0.191384	0.334918		1.1043	0.254185	0.239884		0.140949	1	-0.0960832		0.0316066	1	-0.0329475		0.0274021	0.995187	-0.00652292		0.0574371	1	-0.0488439			0.143395	-0.15913	0.399587	-0.260485	0.495787
4967	Q9H6T3	RPAP3	RNA polymerase II-associated protein 3 OS=Homo sapiens GN=RPAP3 PE=1 SV=2	RPAP3 (14)	RPAP3 (16)	RPAP3 (14;16)	Both		14	16		0.377271	0.824522	-0.0307289		0.120714	0.952606	0.00974487		0.97156	0.454633	0.115913		0.942521	0.284335	0.239787		0.765021	1	-0.110155		0.553236	1	-0.0861584		0.667027	1	-0.144376		0.0853546	1	0.0275709			0.00817452	-0.008216	-0.0104649	0.0216795	0.150391
6198	Q9UI30	TRMT112	Multifunctional methyltransferase subunit TRM112-like protein OS=Homo sapiens GN=TRMT112 PE=1 SV=1	TRMT112 (3)	TRMT112 (1)	TRMT112 (3;1)	Both		3	1		0.237331	0.380278	0.207516		0.236922	0.543622	0.160299		0.143544	0.850416	-0.0300853		0.759325	0.288863	0.239399		0.422514	1	0.184731		0.103507	1	-0.0395505		0.261868	0.972389	-0.0767173		0.755816	1	-0.238086			-0.102863	0.0959553	-0.0625386	-0.0496402	-0.0902537
4971	P49247	RPIA	Ribose-5-phosphate isomerase OS=Homo sapiens GN=RPIA PE=1 SV=3	RPIA (4)	RPIA (6)	RPIA (4;6)	Both		4	6		1.21484	0.257383	-0.230635		0.0129651	0.989683	-0.00319991		0.506933	0.338783	-0.180304		0.487138	0.312037	0.239015		0.349703	1	0.159065		0.139205	1	0.0631163		0.101856	0.960656	-0.0528445		0.395041	1	-0.206544			-0.16897	0.151148	-0.252109	-0.0128853	-0.297607
1741	A0A0A0MSA7	EIF4G3	Eukaryotic translation initiation factor 4 gamma 3 OS=Homo sapiens GN=EIF4G3 PE=1 SV=1	EIF4G3 (1)	EIF4G3 (1)	EIF4G3 (1;1)	Both		1	1		0.708915	0.261506	-0.261007		0.385287	0.57978	-0.129117		0.396681	0.626522	0.0824857		0.962392	0.296417	0.238991		0.0589939	1	-0.0460937		0.282764	1	0.112988		0.795791	1	-0.177183		0.570647	1	0.15346			0.0114716	-0.0115562	-0.177176	-0.227006	0.143132
2421	P40939	HADHA	Trifunctional enzyme subunit alpha, mitochondrial OS=Homo sapiens GN=HADHA PE=1 SV=2	HADHA (29)	HADHA (29)	HADHA (29;29)	Both	Mitochondrion-Mtx	29	29		0.330886	0.754493	-0.0443223		0.822253	0.585501	0.101754		0.258011	0.765488	0.0446841		1.58585	0.248643	0.238933		0.0786852	1	0.0119231		0.159637	1	-0.0224934		0.107318	0.993065	0.0158385		0.548832	1	-0.078847			-0.085328	0.0805123	-0.0409255	0.0859039	0.0846454
2516	P35914	HMGCL	Hydroxymethylglutaryl-CoA lyase, mitochondrial OS=Homo sapiens GN=HMGCL PE=1 SV=2	HMGCL (4)	HMGCL (4)	HMGCL (4;4)	Both		4	4		3.29735	0.262118	0.20619		0.0525796	0.979429	0.00547629		1.83408	0.310549	0.176612		1.75955	0.253445	0.238841		0.391853	1	-0.0286422		0.28233	1	-0.0199077		0.104432	0.993396	0.013429		0.314601	1	0.0273711			-0.0433455	0.0420548	0.196588	-0.0231988	0.197856
5891	P23193	TCEA1	Transcription elongation factor A protein 1 OS=Homo sapiens GN=TCEA1 PE=1 SV=2	TCEA1 (8)	TCEA1 (9)	TCEA1 (8;9)	Both		8	9		0.306677	0.478616	0.128981		0.159594	0.831131	0.036981		0.856086	0.176252	0.32862		1.17352	0.255898	0.238495		0.0598597	1	-0.0223118		0.0422613	1	-0.0275171		0.181692	0.964206	-0.0437966		0.117281	1	0.0234069			-0.0143432	0.0141928	-0.00580973	0.0907401	0.216079
3661	O95168	NDUFB4	NADH dehydrogenase [ubiquinone] 1 beta subcomplex subunit 4 OS=Homo sapiens GN=NDUFB4 PE=1 SV=3	NDUFB4 (3)	NDUFB4 (1)	NDUFB4 (3;1)	Both		3	1		0.755935	0.402713	0.147235		0.130831	0.711073	0.0793393		0.312922	0.731801	0.0507241		0.444823	0.329216	0.238491		0.0558658	1	-0.0504001		0.0696622	1	-0.0322021		0.153769	0.971877	-0.0809915		0.0710717	1	-0.0406232			-0.106545	0.099154	0.204476	-0.10608	0.00688178
1547	Q9NVH1	DNAJC11	DnaJ homolog subfamily C member 11 OS=Homo sapiens GN=DNAJC11 PE=1 SV=2	DNAJC11 (7)	DNAJC11 (6)	DNAJC11 (7;6)	Both	Mitochondrion-IM	7	6		0.0594441	0.946139	-0.0108827		0.900511	0.709141	0.0607248		1.07505	0.682454	0.0581358		0.922338	0.288831	0.238223		0.503711	1	-0.0147746		0.48508	1	-0.0911148		0.612064	1	-0.129		0.083396	1	-0.0173458			-0.0102439	0.0101651	0.0406616	0.0405533	0.0571957
4774	P54136	RARS	Arginine--tRNA ligase, cytoplasmic OS=Homo sapiens GN=RARS PE=1 SV=2	RARS (23)	RARS (24)	RARS (23;24)	Both		23	24		0.178021	0.92736	0.013346		0.460946	0.526301	0.15267		0.583236	0.492159	0.111542		0.306319	0.357411	0.238153		0.314747	1	0.133107		0.298655	1	0.0682983		0.169372	0.97492	-0.13048		0.0383044	1	0.0454007			0.0312139	-0.0318837	0.0174417	0.249009	0.0537325
4736	P63000	RAC1	Ras-related C3 botulinum toxin substrate 1 OS=Homo sapiens GN=RAC1 PE=1 SV=1	RAC1 (13)	RAC1 (7)	RAC1 (13;7)	Both	Plasma membrane	13	7		0.0947299	0.868432	-0.0272526		0.980241	0.279859	0.296932		0.0384559	0.961414	-0.00896841		0.368301	0.348393	0.237957		0.2292	1	0.134555		0.0683951	1	-0.0236087		0.255898	1	-0.161853		0.106344	1	-0.0774226			-0.00946249	0.00939468	-0.112673	0.369653	-0.0739739
1511	Q8TF46	DIS3L	DIS3-like exonuclease 1 OS=Homo sapiens GN=DIS3L PE=1 SV=2	DIS3L (2)	DIS3L (3)	DIS3L (2;3)	Both		2	3		0.676646	0.639648	0.0640997		0.747128	0.682735	-0.068019		2.54799	0.15991	0.295189		0.618291	0.308703	0.23791		0.353589	1	-0.064393		0.379827	1	-0.028797		0.486775	1	-0.180959		0.230388	1	-0.0805987			-0.0949587	0.0890379	0.0449955	-0.0625975	0.316418
3842	Q5TFE4	NT5DC1	5'-nucleotidase domain-containing protein 1 OS=Homo sapiens GN=NT5DC1 PE=1 SV=1	NT5DC1 (9)	NT5DC1 (6)	NT5DC1 (9;6)	Both		9	6		0.826601	0.498569	0.103393		1.10896	0.587304	0.100926		2.52727	0.200821	0.25504		0.725807	0.300016	0.237907		0.00871396	0.999666	0.00271407		0.0651776	1	-0.00285103		0.157955	0.964147	0.0457112		0.187019	1	-0.0536588			-0.0240903	0.0236797	0.0639625	0.0744848	0.243472
1195	Q9UNS2	COPS3	COP9 signalosome complex subunit 3 OS=Homo sapiens GN=COPS3 PE=1 SV=3	COPS3 (23)	COPS3 (24)	COPS3 (23;24)	Both		23	24		0.518926	0.670901	0.0653923		0.0105338	0.994605	-0.00164355		2.90959	0.522666	0.0889953		4.20321	0.236813	0.236814		0.268089	1	0.0123536		1.37318	1	-0.0443863		0.425093	0.96299	-0.0594361		1.96079	1	-0.0516773			-0.0210442	0.0207285	0.100946	0.0416393	0.0927068
1633	Q9BVJ7	DUSP23	Dual specificity protein phosphatase 23 OS=Homo sapiens GN=DUSP23 PE=1 SV=1	DUSP23 (1)	DUSP23 (1)	DUSP23 (1;1)	Both		1	1		0.11304	0.662368	-0.071278		0.286629	0.587371	-0.110099		0.348882	0.365232	-0.165514		0.666061	0.280881	0.236043		0.559895	1	0.261467		0.115728	1	0.0912874		0.408412	1	0.167182		0.853297	1	-0.331344			-0.143271	0.13024	0.0722303	-0.17492	-0.0611375
1168	Q9Y2V7	COG6	Conserved oligomeric Golgi complex subunit 6 OS=Homo sapiens GN=COG6 PE=1 SV=2	COG6 (8)	COG6 (2)	COG6 (8;2)	Both		8	2		0.363303	0.246805	-0.337722		0.101946	0.88644	0.0256572		0.14738	0.633605	-0.085573		1.2076	0.260871	0.235718		0.0273038	1	0.0175286		0.106162	1	-0.0908728		0.162491	0.974903	0.0269241		0.388048	1	-0.0632787			-0.0345366	0.033708	-0.0621921	-0.0209327	0.0812872
5107	Q06455	RUNX1T1	Protein CBFA2T1 OS=Homo sapiens GN=RUNX1T1 PE=1 SV=2	RUNX1T1 (2)	RUNX1T1 (3)	RUNX1T1 (2;3)	Both		2	3		1.20678	0.367618	-0.154347		0.857544	0.485774	-0.149288		1.09888	0.423694	-0.122294		1.34101	0.2587	0.235704		1.6998	1	0.342804		0.542577	1	0.0816095		0.0650818	0.996437	0.0112216		0.259062	1	-0.0892474			-0.114776	0.106249	-0.192196	-0.204738	-0.100274
4416	Q9BZL4	PPP1R12C	Protein phosphatase 1 regulatory subunit 12C OS=Homo sapiens GN=PPP1R12C PE=1 SV=1	PPP1R12C (3)	PPP1R12C (6)	PPP1R12C (3;6)	Both		3	6		0.294413	0.582489	0.0883262		0.215447	0.830686	0.0361235		0.445034	0.565116	0.08844		0.816812	0.28766	0.235587		0.110124	1	0.0242092		0.0727246	1	-0.0242112		0.135856	0.962501	-0.0416478		0.00688883	1	-0.00216919			0.0199882	-0.0202562	0.178763	0.0749733	0.146798
2972	P53671	LIMK2	LIM domain kinase 2 OS=Homo sapiens GN=LIMK2 PE=1 SV=1	LIMK2 (3)	LIMK2 (4)	LIMK2 (3;4)	Both		3	4		0.202221	0.886622	-0.0228249		1.87386	0.581551	0.102908		0.212388	0.542781	-0.114407		0.219295	0.390402	0.235529		0.018477	1	-0.0108325		0.00203894	1	0.00125093		0.287031	1	-0.305815		0.0940824	1	0.120463			0.00313047	-0.00313529	-0.0575535	0.0887465	-0.279292
6135	P67936	TPM4	Tropomyosin alpha-4 chain OS=Homo sapiens GN=TPM4 PE=1 SV=3	TPM4 (15)	TPM4 (11)	TPM4 (15;11)	Both		15	11		0.241873	0.792308	-0.0386159		0.116096	0.935828	-0.0144034		0.312987	0.649025	0.0736851		1.6114	0.253319	0.235488		0.00528717	0.999156	0.0017534		0.522913	1	-0.138481		0.0134914	0.998838	-0.00294447		0.339186	1	-0.052268			-0.0581141	0.0558289	0.00582137	0.00799563	0.145298
4473	P30041	PRDX6	Peroxiredoxin-6 OS=Homo sapiens GN=PRDX6 PE=1 SV=3	PRDX6 (26)	PRDX6 (27)	PRDX6 (26;27)	Both		26	27		0.332966	0.691339	0.06324		0.170931	0.756533	0.0637526		0.686386	0.369101	0.169626		0.505889	0.335831	0.235383		0.106676	1	-0.0211091		0.268489	1	-0.0512143		0.114252	0.96164	-0.0536094		0.344187	1	0.156626			-0.0146895	0.0145322	0.120053	-0.0500073	0.227582
5270	P35237	SERPINB6	Serpin B6 OS=Homo sapiens GN=SERPINB6 PE=1 SV=3	SERPINB6 (4)	SERPINB6 (3)	SERPINB6 (4;3)	Both		4	3		0.291559	0.645847	0.071196		0.973056	0.606242	-0.0897143		1.80548	0.303067	0.178461		2.12906	0.248885	0.235275		0.348987	1	-0.0710214		0.282875	1	0.134592		0.694515	0.979675	-0.11978		0.787028	1	0.0629914			-0.0237331	0.0233342	0.145166	-0.109181	0.164059
3518	Q96S97	MYADM	Myeloid-associated differentiation marker OS=Homo sapiens GN=MYADM PE=1 SV=2	MYADM (2)	MYADM (1)	MYADM (2;1)	Both	Plasma membrane	2	1		0.740908	0.533336	-0.0890852		0.00401117	0.992397	-0.00283992		0.0735181	0.834949	-0.0393088		1.73935	0.251405	0.234825		0.0112372	1	0.00643647		0.321834	1	-0.192914		0.127676	0.964319	-0.0449944		0.343338	1	-0.136602			-0.0550256	0.0529708	-0.0809338	-0.200355	-0.197559
5024	Q96P16	RPRD1A	Regulation of nuclear pre-mRNA domain-containing protein 1A OS=Homo sapiens GN=RPRD1A PE=1 SV=1	RPRD1A (6)	RPRD1A (7)	RPRD1A (6;7)	Both		6	7		0.399512	0.571968	-0.0827357		0.107833	0.87383	-0.0279911		0.084862	0.896	0.020307		1.01406	0.265816	0.234759		0.293921	1	-0.0831275		0.322123	1	-0.108269		0.0143874	0.998984	0.0033713		0.2797	1	-0.0658625			-0.169376	0.151473	-0.115213	-0.0797357	0.00060422
6699	Q9NP64	ZCCHC17	Nucleolar protein of 40 kDa OS=Homo sapiens GN=ZCCHC17 PE=1 SV=1	ZCCHC17 (3)	ZCCHC17 (4)	ZCCHC17 (3;4)	Both		3	4		0.573526	0.278773	0.250194		0.0972406	0.850341	-0.0391803		0.374207	0.619131	0.0826291		0.252387	0.378092	0.23427		0.225747	1	-0.105965		0.271648	1	-0.0912212		0.185278	1	-0.171574		0.132933	1	0.178739			0.0138149	-0.0139397	0.365029	-0.159619	0.015184
1117	Q5SYC1	CLVS2	Clavesin-2 OS=Homo sapiens GN=CLVS2 PE=2 SV=1	CLVS2 (2)	CLVS2 (2)	CLVS2 (2;2)	Both		2	2		0.407936	0.720399	0.0492541		1.49494	0.359453	0.202072		0.269909	0.842471	-0.0302018		0.318488	0.3575	0.234243		0.428639	1	0.0865116		0.14429	1	-0.0203355		0.0405835	0.974453	-0.0314512		0.139793	1	-0.103252			-0.110381	0.10247	0.0743679	0.162321	-0.0329616
6	Q2M2I8	AAK1	AP2-associated protein kinase 1 OS=Homo sapiens GN=AAK1 PE=1 SV=3	AAK1 (18)	AAK1 (15)	AAK1 (18;15)	Both		18	15		0.32983	0.677834	0.0654212		0.445697	0.901763	0.0211424		0.865655	0.792712	0.0380598		1.15563	0.284696	0.234226		1.18368	1	-0.0184149		0.203485	1	0.0126411		0.592894	0.971387	-0.0891089		0.374271	1	0.0533989			0.0423878	-0.0436431	0.125867	0.0279257	0.0351637
179	P54819	AK2	Adenylate kinase 2, mitochondrial OS=Homo sapiens GN=AK2 PE=1 SV=2	AK2 (17)	AK2 (15)	AK2 (17;15)	Both	Mitochondrion-Mtx	17	15		0.403021	0.653269	0.0714462		0.123631	0.92228	-0.0202541		0.987614	0.487251	0.111484		2.58545	0.25131	0.23401		0.106332	1	0.0342629		0.169379	1	-0.0486603		0.936697	0.966083	0.0701607		0.752869	1	-0.0807479			-0.0186646	0.0184147	0.0190146	-0.0696573	0.0855577
2814	Q9Y4C1	KDM3A	Lysine-specific demethylase 3A OS=Homo sapiens GN=KDM3A PE=1 SV=4	KDM3A (2)	KDM3A (1)	KDM3A (2;1)	Both		2	1		0.749682	0.219719	-0.336641		0.265809	0.411719	0.247667		0.328802	0.248577	0.308458		0.201127	0.399909	0.233487		0.044951	1	-0.0531165		0.0324592	1	-0.0322774		0.0963089	0.966639	-0.114883		0.0224336	1	-0.0411285			0.00601304	-0.00603458	-0.2155	-0.0415932	0.0205373
2241	P00367	GLUD1	Glutamate dehydrogenase 1, mitochondrial OS=Homo sapiens GN=GLUD1 PE=1 SV=2	GLUD1 (30)	GLUD1 (29)	GLUD1 (30;29)	Both	Mitochondrion-Mtx	30	29		0.499297	0.695004	0.0611223		0.54317	0.830389	0.0399002		0.380735	0.487224	0.125875		2.46225	0.261979	0.233414		0.147263	1	0.0468407		0.0152028	1	-0.0053016		1.28009	0.968122	-0.0725717		0.566267	1	-0.0757089			-0.0105381	0.010455	0.0273789	0.0600566	0.0293054
5339	P34896	SHMT1	Serine hydroxymethyltransferase, cytosolic OS=Homo sapiens GN=SHMT1 PE=1 SV=1	SHMT1 (10)	SHMT1 (7)	SHMT1 (10;7)	Both		10	7		0.912965	0.466897	0.119646		0.14545	0.965737	-0.00723184		0.56213	0.301506	0.222018		0.74521	0.31233	0.233135		0.330949	1	0.115757		0.0459299	1	-0.0183897		0.0241197	0.995695	-0.0110432		0.529152	1	-0.160449			-0.0289194	0.0283334	0.0849655	-0.00301517	0.116673
2998	Q9C0E8	LNP	Protein lunapark OS=Homo sapiens GN=LNP PE=1 SV=2	LNP (11)	LNP (7)	LNP (11;7)	Both	ER-Membrane	11	7		2.00285	0.488043	0.102141		0.385381	0.751221	0.0590134		1.44223	0.39862	0.13608		2.84332	0.24562	0.232965		0.843178	1	0.0777367		0.435635	1	0.0359705		0.529993	0.96941	0.0312511		0.0407776	1	0.00456077			0.0331896	-0.0339493	0.102799	0.0117635	0.11226
3439	P82675	MRPS5	28S ribosomal protein S5, mitochondrial OS=Homo sapiens GN=MRPS5 PE=1 SV=2	MRPS5 (5)	MRPS5 (3)	MRPS5 (5;3)	Both	Mitochondrion-Mtx	5	3		0.647619	0.49402	0.113389		0.595746	0.43223	0.195838		0.515825	0.226144	0.303744		0.216071	0.395769	0.232783		0.172463	1	-0.0905912		0.31395	1	-0.167719		0.206977	1	-0.222274		0.0286131	1	0.0367643			0.0412561	-0.0424435	0.063244	0.107631	0.143007
2057	Q8NFF5	FLAD1	FAD synthase OS=Homo sapiens GN=FLAD1 PE=1 SV=1	FLAD1 (9)	FLAD1 (9)	FLAD1 (9;9)	Both		9	9		1.80648	0.444304	0.118918		0.386879	0.839416	-0.0339793		0.590074	0.551562	0.0938137		0.618571	0.320601	0.232765		0.177694	1	0.0280602		0.309301	1	0.0482113		0.209983	0.961783	-0.067981		0.177146	1	-0.0575928			-0.0487519	0.0471287	0.122819	-0.0600341	0.141033
1388	Q96PD2	DCBLD2	Discoidin, CUB and LCCL domain-containing protein 2 OS=Homo sapiens GN=DCBLD2 PE=1 SV=1	DCBLD2 (2)	DCBLD2 (1)	DCBLD2 (2;1)	Both		2	1		0.27384	0.414876	0.172133		1.20638	0.364456	-0.201032		0.130985	0.867674	-0.0256026		0.313961	0.357627	0.232669		0.0626025	1	-0.0221089		0.329954	1	0.302287		0.0589212	0.965036	-0.0458847		0.123099	1	0.179473			-0.167758	0.150177	-0.026353	-0.162502	0.000372122
2652	Q96LB3	IFT74	Intraflagellar transport protein 74 homolog OS=Homo sapiens GN=IFT74 PE=1 SV=1	IFT74 (7)	IFT74 (6)	IFT74 (7;6)	Both		7	6		0.503001	0.808855	-0.03397		0.822096	0.827086	-0.0352218		1.12907	0.686564	0.0567322		0.720857	0.315207	0.232261		0.665752	1	-0.142466		0.0127555	1	-0.00139658		0.448726	0.981214	-0.114203		0.197011	1	-0.050182			-0.0437006	0.0423893	-0.0136256	-0.044653	0.0707496
3242	Q9H204	MED28	Mediator of RNA polymerase II transcription subunit 28 OS=Homo sapiens GN=MED28 PE=1 SV=1	MED28 (2)	MED28 (1)	MED28 (2;1)	Both	Nuclear (100% filter)	2	1		0.00436058	0.986951	-0.00297458		0.0110416	0.990723	-0.00278937		0.508498	0.406168	0.147793		0.886522	0.28796	0.232166		0.184609	1	-0.0796623		0.00855811	1	0.00847794		0.0465901	0.992008	0.0144256		0.389123	1	0.125342			-0.0992587	0.09281	-0.19335	-0.0690161	0.0560884
6737	P52747	ZNF143	Zinc finger protein 143 OS=Homo sapiens GN=ZNF143 PE=1 SV=2	ZNF143 (4)	ZNF143 (1)	ZNF143 (4;1)	Both		4	1		0.360771	0.66425	-0.0673069		0.110639	0.820682	-0.0469219		0.219294	0.341791	0.233781		0.420689	0.34866	0.232061		0.236915	1	-0.251574		0.0824769	1	0.0926498		0.128821	0.968469	-0.0746923		0.066853	1	-0.0363149			0.0373586	-0.0383275	-0.0104455	-0.174492	-0.0924628
4606	Q16647	PTGIS	Prostacyclin synthase OS=Homo sapiens GN=PTGIS PE=1 SV=1	PTGIS (1)	PTGIS (2)	PTGIS (1;2)	Both		1	2		0.0546299	0.853032	0.0339967		0.378861	0.679046	0.073309		1.80107	0.216043	0.243336		0.449387	0.340074	0.231776		0.140739	1	-0.0163312		0.0768611	1	-0.0275032		0.0198494	0.996779	-0.0112849		0.218521	1	-0.109312			-0.00847201	0.00841717	0.211456	0.129838	0.276005
5847	P26639	TARS	Threonine--tRNA ligase, cytoplasmic OS=Homo sapiens GN=TARS PE=1 SV=3	TARS (36)	TARS (32)	TARS (36;32)	Both		36	32		0.944662	0.570462	-0.0807015		2.10997	0.463377	0.145707		0.444095	0.700292	0.0598409		0.403868	0.348954	0.231534		0.475786	1	-0.0721925		0.150685	1	-0.0208271		0.109689	0.963823	-0.0657036		0.171264	1	0.103028			-0.00960636	0.00953684	-0.107151	0.128963	0.0173163
6414	P31930	UQCRC1	Cytochrome b-c1 complex subunit 1, mitochondrial OS=Homo sapiens GN=UQCRC1 PE=1 SV=3	UQCRC1 (22)	UQCRC1 (21)	UQCRC1 (22;21)	Both	Mitochondrion-IM	22	21		0.128872	0.897833	-0.022534		0.442001	0.753502	0.060176		1.2999	0.452655	0.122984		1.43453	0.291024	0.231443		0.0560284	0.999444	0.00378666		0.895028	1	-0.0523916		0.509446	0.963923	-0.056738		0.047722	1	-0.00649186			-0.00210893	0.00210439	-0.0753508	0.0990082	0.108337
3413	Q13405	MRPL49	39S ribosomal protein L49, mitochondrial OS=Homo sapiens GN=MRPL49 PE=1 SV=1	MRPL49 (3)	MRPL49 (2)	MRPL49 (3;2)	Both	Mitochondrion-Mtx	3	2		0.171358	0.840241	0.0286998		0.307906	0.450042	-0.20459		0.137519	0.694179	0.0713624		0.522257	0.328008	0.231369		0.100989	1	-0.0883819		0.0170117	1	0.0170195		0.0827547	0.96492	-0.0393131		0.086808	1	-0.0465435			-0.0328649	0.0321127	-0.0137613	-0.409984	-0.0876587
3507	O75431	MTX2	Metaxin-2 OS=Homo sapiens GN=MTX2 PE=1 SV=1	MTX2 (7)	MTX2 (7)	MTX2 (7;7)	Both		7	7		1.50571	0.428235	-0.125077		0.425236	0.609753	0.102014		0.885313	0.59271	-0.0756925		1.10463	0.28304	0.231009		0.718262	1	-0.0588203		0.488366	1	-0.0697998		0.372195	0.964071	-0.0667972		0.444325	1	-0.0806512			-0.0612899	0.0587554	-0.112235	0.0267605	-0.0570538
6368	Q8WUN7	UBTD2	Ubiquitin domain-containing protein 2 OS=Homo sapiens GN=UBTD2 PE=1 SV=2	UBTD2 (5)	UBTD2 (4)	UBTD2 (5;4)	Both		5	4		0.492158	0.652407	0.0692107		1.62483	0.590627	0.0981778		0.328755	0.744512	-0.0544945		1.30804	0.285083	0.230751		0.0784086	1	-0.0136453		0.111465	1	0.018881		0.260596	0.969603	0.0294692		0.160529	1	-0.0174815			-0.0294982	0.0288888	0.0271523	0.0817825	-0.00395974
5389	Q6NUK1	SLC25A24	Calcium-binding mitochondrial carrier protein SCaMC-1 OS=Homo sapiens GN=SLC25A24 PE=1 SV=2	SLC25A24 (22)	SLC25A24 (15)	SLC25A24 (22;15)	Both	Mitochondrion-IM	22	15		0.188886	0.861462	-0.0276934		0.184903	0.898349	-0.0243622		1.85243	0.510619	0.0924611		3.2757	0.245134	0.230664		0.208696	1	0.0285489		0.177044	1	-0.0216829		0.298939	0.993526	0.011382		0.700994	1	-0.0890963			-0.0376119	0.0366333	0.0165609	-0.0645923	0.102095
3910	Q02218	OGDH	2-oxoglutarate dehydrogenase, mitochondrial OS=Homo sapiens GN=OGDH PE=1 SV=3	OGDH (38)	OGDH (29)	OGDH (38;29)	Both	Mitochondrion-Mtx	38	29		0.53736	0.610673	0.0821399		1.03059	0.61978	0.0945536		0.488858	0.436029	0.142968		0.885762	0.312459	0.230558		0.122961	1	0.0407922		0.087632	1	-0.0246827		0.396891	0.968536	-0.0669885		0.117808	1	0.0267585			0.0154704	-0.015628	0.0408352	0.0759261	0.223281
5272	P50453	SERPINB9	Serpin B9 OS=Homo sapiens GN=SERPINB9 PE=1 SV=1	SERPINB9 (18)	SERPINB9 (17)	SERPINB9 (18;17)	Both		18	17		0.148502	0.807391	-0.0412613		0.831643	0.582357	0.118008		0.873586	0.261171	0.245374		0.933778	0.311174	0.230515		0.099592	1	0.0198288		0.442783	1	-0.0953989		0.0201572	0.999121	-0.0032549		0.265801	1	-0.038504			-0.00128055	0.00127847	-0.125647	0.148042	0.191535
5933	Q9UBB9	TFIP11	Tuftelin-interacting protein 11 OS=Homo sapiens GN=TFIP11 PE=1 SV=1	TFIP11 (14)	TFIP11 (10)	TFIP11 (14;10)	Both		14	10		0.0851422	0.946227	-0.0098347		0.0738611	0.953562	-0.00946184		1.41858	0.308459	0.177977		0.851946	0.297043	0.230209		0.0776166	1	-0.0164461		0.0839319	1	-0.0307997		0.143952	0.966419	-0.0356989		0.107128	1	-0.0412611			-0.0693901	0.0661643	-0.0166585	-0.0318448	0.140822
4684	P61106	RAB14	Ras-related protein Rab-14 OS=Homo sapiens GN=RAB14 PE=1 SV=4	RAB14 (26)	RAB14 (18)	RAB14 (26;18)	Both	Endosome	26	18		0.351035	0.924817	0.0142315		0.139395	0.943862	0.0142394		0.331833	0.809008	-0.0407273		1.00832	0.305684	0.230132		0.618472	1	0.0807148		0.418638	1	-0.0541424		0.916176	1	-0.142252		0.235747	1	0.0992363			0.022729	-0.0230778	0.00183097	0.044987	-0.00347436
4540	Q8WUY3	PRUNE2	Protein prune homolog 2 OS=Homo sapiens GN=PRUNE2 PE=1 SV=3	PRUNE2 (4)	PRUNE2 (3)	PRUNE2 (4;3)	Both		4	3		3.28261	0.125268	0.516675		1.81304	0.212842	0.426549		0.34065	0.446539	0.142426		0.382172	0.351281	0.230087		0.168025	1	-0.070717		0.0409698	1	-0.0180892		0.259189	1	0.174645		0.323586	1	0.187532			0.0511191	-0.0529629	0.540834	0.384358	0.267979
1240	P31327	CPS1	Carbamoyl-phosphate synthase [ammonia], mitochondrial OS=Homo sapiens GN=CPS1 PE=1 SV=2	CPS1 (24)	CPS1 (21)	CPS1 (24;21)	Both	Mitochondrion-Mtx	24	21		0.451994	0.724164	-0.0501872		1.61776	0.545942	-0.117303		0.0976259	0.849054	0.0348602		1.24695	0.281028	0.229823		0.472372	1	0.181777		0.342463	1	0.117981		0.0797898	0.99448	-0.0124262		0.543427	1	-0.179852			-0.0164709	0.0162748	-0.016834	-0.136264	-0.0718566
1772	Q5J8M3	EMC4	ER membrane protein complex subunit 4 OS=Homo sapiens GN=EMC4 PE=1 SV=2	EMC4 (1)	EMC4 (1)	EMC4 (1;1)	Both		1	1		0.184587	0.496889	-0.135591		0.302175	0.782097	0.0469115		0.898181	0.182473	-0.319194		1.18681	0.270052	0.229579		0.209722	1	0.102621		0.305966	1	-0.104555		0.106389	0.985656	-0.0201467		0.532431	1	-0.197379			-0.113284	0.104968	-0.36417	0.0445774	-0.423312
4494	A0A0C4DGP4	PRKCSH	Glucosidase 2 subunit beta (Fragment) OS=Homo sapiens GN=PRKCSH PE=1 SV=1	PRKCSH (1)	PRKCSH (1)	PRKCSH (1;1)	Both		1	1		0.0389709	0.843811	0.0340071		0.189154	0.534554	0.154225		0.247521	0.345313	-0.191708		0.139334	0.435474	0.229579		0.224268	1	-0.124126		0.0657225	1	0.0380805		0.229241	1	0.365177		0.190507	1	-0.478209			-0.7196	0.477663	-0.182209	0.268487	-0.0864235
287	P50995	ANXA11	Annexin A11 OS=Homo sapiens GN=ANXA11 PE=1 SV=1	ANXA11 (2)	ANXA11 (5)	ANXA11 (2;5)	Both		2	5		1.30093	0.185333	0.34641		0.289161	0.593334	0.105345		0.0597192	0.885119	0.0235774		0.574992	0.301547	0.229541		0.391726	1	0.0993217		0.156861	1	-0.097146		0.01678	0.995065	0.00860134		0.255742	1	-0.161116			-0.102973	0.0960517	0.286224	0.184663	0.0879285
588	P51572	BCAP31	B-cell receptor-associated protein 31 OS=Homo sapiens GN=BCAP31 PE=1 SV=3	BCAP31 (11)	BCAP31 (10)	BCAP31 (11;10)	Both	ER-Membrane	11	10		2.79618	0.200347	0.304719		0.1331	0.938785	0.0135048		1.57228	0.394827	0.132116		0.566646	0.329512	0.229335		0.200586	1	0.0398146		0.48744	1	0.0319898		0.0748417	0.974894	0.0286991		0.178376	1	0.0950008			0.0791661	-0.0837092	0.315364	-0.00361203	0.112133
3041	Q9UFC0	LRWD1	Leucine-rich repeat and WD repeat-containing protein 1 OS=Homo sapiens GN=LRWD1 PE=1 SV=2	LRWD1 (4)	LRWD1 (6)	LRWD1 (4;6)	Both	Nuclear (100% filter)	4	6		0.368642	0.736115	0.0466998		0.149237	0.764979	-0.0586879		1.43259	0.287861	0.190375		1.86322	0.257249	0.228939		0.653743	1	-0.0922249		0.543309	1	-0.0689754		2.24709	1	-0.228801		0.215681	1	-0.0690849			0.0495962	-0.0513289	0.0720272	-0.179498	0.151109
5720	Q8WXE9	STON2	Stonin-2 OS=Homo sapiens GN=STON2 PE=1 SV=1	STON2 (3)	STON2 (3)	STON2 (3;3)	Both	Plasma membrane	3	3		1.97209	0.367232	0.151765		1.91192	0.486981	0.141594		2.42219	0.249285	0.214292		1.46202	0.273792	0.22873		0.622418	1	0.0243771		0.531631	1	0.0696368		0.336014	0.970044	0.0690735		0.0863059	1	0.0226243			-0.0432203	0.0419368	0.150518	0.137474	0.210916
56	P11310	ACADM	Medium-chain specific acyl-CoA dehydrogenase, mitochondrial OS=Homo sapiens GN=ACADM PE=1 SV=1	ACADM (17)	ACADM (14)	ACADM (17;14)	Both	Mitochondrion-Mtx	17	14		3.81075	0.375152	-0.142708		0.196427	0.904921	-0.0237091		0.604945	0.576802	0.0922494		0.560454	0.339344	0.228675		0.439862	1	-0.0627837		0.355821	1	-0.0692176		0.473781	1	-0.167129		0.352773	1	-0.153424			-0.021815	0.0214763	-0.137899	-0.0607999	0.0520124
4782	E9PAU2	RAVER1	Ribonucleoprotein PTB-binding 1 OS=Homo sapiens GN=RAVER1 PE=1 SV=1	RAVER1 (6)	RAVER1 (6)	RAVER1 (6;6)	Both		6	6		0.290967	0.872063	-0.0227867		0.378652	0.71566	-0.0653566		0.722494	0.326443	0.188589		2.41185	0.252814	0.228478		0.088469	1	0.0478857		0.16088	1	-0.0401215		0.953187	0.965559	-0.0327137		1.01089	1	-0.0254834			-0.0688293	0.0656538	-0.0327964	-0.120043	0.258819
5256	Q9P0V9	SEPT10	Septin-10 OS=Homo sapiens GN=SEPT10 PE=1 SV=2	SEPT10 (2)	SEPT10 (1)	SEPT10 (2;1)	Both		2	1		0.214415	0.647613	0.0745056		0.0558644	0.898187	-0.0278747		1.16338	0.19268	0.288862		1.69428	0.258801	0.228468		0.0779818	1	-0.0310301		0.00141268	1	-0.000399135		0.29312	0.962064	-0.0489449		0.194648	1	-0.0560834			-0.059986	0.0575553	0.179172	0.113799	0.351986
3830	Q96MF7	NSMCE2	E3 SUMO-protein ligase NSE2 OS=Homo sapiens GN=NSMCE2 PE=1 SV=2	NSMCE2 (3)	NSMCE2 (1)	NSMCE2 (3;1)	Both		3	1		0.100384	0.800459	0.0391407		0.0818169	0.73514	0.077439		0.0896427	0.722974	0.0670993		0.732249	0.290397	0.228353		0.46901	1	0.341722		0.39731	1	0.291574		0.497139	1	-0.160259		0.011433	1	0.0127699			0.110998	-0.120176	-0.0691776	0.345026	0.275664
6235	Q16762	TST	Thiosulfate sulfurtransferase OS=Homo sapiens GN=TST PE=1 SV=4	TST (7)	TST (11)	TST (7;11)	Both	Mitochondrion-Mtx	7	11		0.347478	0.692185	0.0600589		0.558944	0.765209	-0.0497117		0.78409	0.382352	0.155278		1.18623	0.288389	0.228226		1.07908	1	0.232084		0.655287	1	0.117738		0.0923068	0.976184	-0.025924		0.564613	1	-0.147917			0.0477658	-0.0493698	0.113089	-0.0227011	0.102363
4602	Q96BW5	PTER	Phosphotriesterase-related protein OS=Homo sapiens GN=PTER PE=1 SV=1	PTER (1)	PTER (2)	PTER (1;2)	Both		1	2		0.0518545	0.908174	0.0208376		0.31484	0.526047	0.162006		1.34935	0.257768	0.218522		0.276728	0.376911	0.22804		0.576122	1	-0.240191		0.274361	1	-0.0681405		0.0825382	0.963692	0.0757683		0.157678	1	-0.178785			0.0140915	-0.0142215	0.133854	0.317441	0.262113
3463	Q13126	MTAP	S-methyl-5'-thioadenosine phosphorylase OS=Homo sapiens GN=MTAP PE=1 SV=2	MTAP (11)	MTAP (8)	MTAP (11;8)	Both		11	8		1.29528	0.644218	0.0647971		1.14943	0.652808	-0.0806051		1.47116	0.2418	0.242451		4.40174	0.247301	0.227999		0.294175	1	0.0594017		0.0919468	1	-0.0157677		0.662114	0.968724	0.0330655		0.953469	1	-0.0941505			0.0124015	-0.0125013	0.077219	-0.0968314	0.220041
5221	O95486	SEC24A	Protein transport protein Sec24A OS=Homo sapiens GN=SEC24A PE=1 SV=2	SEC24A (14)	SEC24A (16)	SEC24A (14;16)	Both		14	16		0.0500411	0.937262	0.0137075		1.21376	0.546593	0.1203		1.02891	0.483173	0.106822		0.698124	0.321012	0.22766		0.00182349	0.99874	0.000322321		0.726913	1	-0.116419		0.488607	1	-0.133226		0.175005	1	-0.0607388			-0.029913	0.0292869	-0.0654045	0.0918271	0.0761842
6506	Q5THJ4	VPS13D	Vacuolar protein sorting-associated protein 13D OS=Homo sapiens GN=VPS13D PE=1 SV=2	VPS13D (6)	VPS13D (1)	VPS13D (6;1)	Both		6	1		0.441278	0.292256	0.253467		0.288141	0.631274	0.102927		0.885494	0.460118	0.121251		0.717012	0.32565	0.227488		0.154021	1	0.0275457		0.467204	1	0.0530968		0.777211	1	-0.211347		0.465928	1	0.15326			-0.0254416	0.0249849	0.090577	0.211124	0.0881568
984	Q8N960	CEP120	Centrosomal protein of 120 kDa OS=Homo sapiens GN=CEP120 PE=1 SV=2	CEP120 (3)	CEP120 (1)	CEP120 (3;1)	Both		3	1		0.633592	0.50269	-0.101782		0.0244784	0.98014	-0.00510119		1.4496	0.217207	0.248652		0.85621	0.288736	0.227228		0.11751	1	-0.0632054		0.621077	1	-0.0897657		0.152771	0.964151	-0.0461351		0.0681348	1	-0.0188988			-0.0985158	0.0921598	-0.111167	-0.014931	0.241513
4100	O00151	PDLIM1	PDZ and LIM domain protein 1 OS=Homo sapiens GN=PDLIM1 PE=1 SV=4	PDLIM1 (12)	PDLIM1 (12)	PDLIM1 (12;12)	Both	Actin binding proteins	12	12		0.533813	0.514296	-0.0985308		0.361514	0.721579	-0.0593867		1.23358	0.293999	0.188126		1.45658	0.265122	0.227002		0.112221	1	-0.0156195		0.803156	1	-0.123986		0.484561	0.976373	-0.108451		0.619403	1	-0.115972			-0.0933282	0.087602	-0.047863	-0.0241402	0.143261
5271	P50452	SERPINB8	Serpin B8 OS=Homo sapiens GN=SERPINB8 PE=1 SV=2	SERPINB8 (5)	SERPINB8 (5)	SERPINB8 (5;5)	Both		5	5		0.0186673	0.983186	0.00320022		1.05651	0.423307	-0.184824		1.80979	0.216661	0.25184		0.530342	0.341222	0.226929		1.08918	1	-0.112913		0.266981	1	-0.0432819		0.370893	0.998474	-0.145777		0.0240232	1	0.0111984			0.040271	-0.0414009	-0.0446124	-0.223569	0.226287
630	P30043	BLVRB	Flavin reductase (NADPH) OS=Homo sapiens GN=BLVRB PE=1 SV=3	BLVRB (6)	BLVRB (5)	BLVRB (6;5)	Both		6	5		1.85999	0.317837	0.177299		0.217507	0.828454	0.0381121		0.85602	0.592813	0.075976		1.43116	0.272633	0.226765		0.237941	1	-0.0891916		0.02148	1	-0.00470045		0.583559	0.968647	0.0847234		0.378142	1	-0.0530186			-0.0941717	0.0883452	0.161732	-0.0146823	0.0587411
1012	Q9UFW8	CGGBP1	CGG triplet repeat-binding protein 1 OS=Homo sapiens GN=CGGBP1 PE=1 SV=2	CGGBP1 (5)	CGGBP1 (5)	CGGBP1 (5;5)	Both	Nuclear (100% filter)	5	5		0.0493132	0.922966	0.0170939		0.775584	0.279084	0.310485		0.953867	0.224531	0.263065		0.41934	0.348642	0.226765		0.134159	1	0.146347		0.11357	1	-0.0659327		0.0369009	0.986724	0.0210017		0.0197041	1	0.0137218			0.0951156	-0.101765	-0.0826997	0.412211	0.334366
3483	P46199	MTIF2	Translation initiation factor IF-2, mitochondrial OS=Homo sapiens GN=MTIF2 PE=1 SV=2	MTIF2 (8)	MTIF2 (5)	MTIF2 (8;5)	Both		8	5		0.198478	0.82658	-0.0357479		0.657969	0.633235	0.0930238		1.46291	0.279414	0.208199		0.386268	0.357429	0.226493		0.0145266	0.999223	-0.00165939		0.0929184	1	-0.0176887		0.348712	1	-0.194301		0.101548	1	0.0628953			0.024696	-0.0251102	-0.0910978	0.130737	0.232831
218	Q9H2A2	ALDH8A1	Aldehyde dehydrogenase family 8 member A1 OS=Homo sapiens GN=ALDH8A1 PE=1 SV=1	ALDH8A1 (4)	ALDH8A1 (3)	ALDH8A1 (4;3)	Both		4	3		1.34544	0.518995	0.0927591		0.984722	0.816917	-0.0374283		0.361215	0.573826	-0.0968856		0.589743	0.339248	0.226432		0.537282	1	0.143931		0.992966	1	0.307355		0.184239	0.971875	-0.0738143		0.0595975	1	0.0599385			0.0217049	-0.0220225	0.11146	-0.0449552	-0.177515
3576	Q6XQN6	NAPRT	Nicotinate phosphoribosyltransferase OS=Homo sapiens GN=NAPRT PE=1 SV=2	NAPRT (10)	NAPRT (4)	NAPRT (10;4)	Both		10	4		0.345568	0.64053	0.0744109		1.71134	0.5922	-0.0959477		1.56427	0.216576	0.254627		3.01896	0.250941	0.226407		0.538419	1	0.0622794		0.19973	1	-0.0276129		0.27364	0.963185	-0.0701664		0.402441	1	-0.0255692			0.0438235	-0.0451674	0.139901	-0.0928178	0.2206
1161	Q96BR5	COA7	Cytochrome c oxidase assembly factor 7 OS=Homo sapiens GN=COA7 PE=1 SV=2	COA7 (6)	COA7 (5)	COA7 (6;5)	Both	Mitochondrion-Mtx	6	5		0.0663983	0.845401	0.0351906		0.0816826	0.941621	-0.0147894		1.38618	0.609122	0.072214		0.313596	0.372387	0.226399		0.0122041	0.999305	-0.00178392		2.55828	1	-0.163699		0.394744	1	-0.287948		0.0177878	1	-0.0196125			0.0477142	-0.0493146	-0.120422	-0.0678419	0.0693322
4559	P28074	PSMB5	Proteasome subunit beta type-5 OS=Homo sapiens GN=PSMB5 PE=1 SV=3	PSMB5 (16)	PSMB5 (10)	PSMB5 (16;10)	Both	Proteasome	16	10		0.754316	0.403148	0.161596		0.313438	0.547488	0.149973		0.504026	0.31845	0.212791		0.564454	0.341008	0.226186		0.201759	1	-0.100176		0.350214	1	-0.131436		0.304632	0.975241	-0.10413		0.0418844	1	0.0203119			-0.000124865	0.000124682	0.114729	0.00639217	0.0984628
4373	P16435	POR	NADPH--cytochrome P450 reductase OS=Homo sapiens GN=POR PE=1 SV=2	POR (26)	POR (25)	POR (26;25)	Both	ER-Membrane	26	25		1.33141	0.380246	0.152062		0.875764	0.778373	0.046199		2.33639	0.355303	0.145881		2.7701	0.253713	0.226107		0.250421	1	0.017927		0.0744735	1	0.0129274		0.356366	0.996219	0.00492574		0.586308	1	0.00837276			0.0103756	-0.0104443	0.12155	0.0448055	0.134485
5274	P50454	SERPINH1	Serpin H1 OS=Homo sapiens GN=SERPINH1 PE=1 SV=2	SERPINH1 (14)	SERPINH1 (24)	SERPINH1 (14;24)	Both	ER-Lumen	14	24		1.33008	0.41504	0.142188		1.03033	0.607077	-0.0991803		0.638199	0.33033	0.196076		2.05246	0.276152	0.226066		0.0743081	1	-0.0284174		0.149797	1	-0.0545934		0.126146	0.991539	-0.015336		1.52912	1	-0.125282			-0.0206891	0.0203837	0.161013	-0.120075	0.120628
2419	Q9UJ83	HACL1	2-hydroxyacyl-CoA lyase 1 OS=Homo sapiens GN=HACL1 PE=1 SV=2	HACL1 (7)	HACL1 (5)	HACL1 (7;5)	Both	Peroxisome	7	5		0.850605	0.658226	0.0600611		0.115028	0.920409	-0.0191174		0.958336	0.294354	0.203401		2.33475	0.257333	0.226009		0.331041	1	0.0614125		0.510489	1	0.149512		0.963514	0.963338	-0.0581049		0.661951	1	-0.124606			-0.0739237	0.0702762	0.0495377	-0.0672519	0.146767
293	P08133	ANXA6	Annexin A6 OS=Homo sapiens GN=ANXA6 PE=1 SV=3	ANXA6 (46)	ANXA6 (44)	ANXA6 (46;44)	Both		46	44		0.608087	0.51617	0.102169		1.18998	0.495098	-0.141285		1.18477	0.215879	0.265447		1.23449	0.286249	0.225936		0.080963	1	0.0166416		0.150364	1	-0.0255515		0.394765	0.963296	-0.0578203		0.23067	1	-0.034063			0.0581928	-0.0606001	0.152237	-0.176081	0.316214
6231	Q9UJ04	TSPYL4	Testis-specific Y-encoded-like protein 4 OS=Homo sapiens GN=TSPYL4 PE=1 SV=2	TSPYL4 (5)	TSPYL4 (2)	TSPYL4 (5;2)	Both		5	2		1.17179	0.240714	0.265663		0.0160904	0.96429	-0.00913284		1.79292	0.103498	0.425668		0.486885	0.32569	0.225664		0.64935	1	0.155991		0.179103	1	0.0737349		0.523711	1	0.323372		0.475824	1	0.326315			-0.0108981	0.0108094	0.209168	-0.166631	0.372993
2148	Q9H2C0	GAN	Gigaxonin OS=Homo sapiens GN=GAN PE=1 SV=1	GAN (9)	GAN (5)	GAN (9;5)	Both		9	5		0.345082	0.792049	0.0415335		0.351533	0.804466	-0.0470207		1.99616	0.645998	0.0641127		0.554171	0.340882	0.225481		0.41414	1	-0.054769		0.0273829	1	0.00819127		0.49102	1	-0.189719		0.0380664	1	-0.0150954			-0.00917827	0.00911443	0.0782911	-0.0879058	0.0605543
229	Q9Y673	ALG5	Dolichyl-phosphate beta-glucosyltransferase OS=Homo sapiens GN=ALG5 PE=1 SV=1	ALG5 (5)	ALG5 (4)	ALG5 (5;4)	Both	ER-Membrane	5	4		0.727142	0.688638	-0.0568823		1.10914	0.679094	0.0698405		0.5933	0.484425	0.119196		0.787197	0.322467	0.22548		0.387734	1	-0.07196		0.535357	1	-0.0974905		0.00535115	1	-0.00126337		0.384525	1	0.0844469			-0.00269861	0.00269194	-0.0339093	0.0875229	0.173005
3596	H7BYX6	NCAM1	Neural cell adhesion molecule 1 OS=Homo sapiens GN=NCAM1 PE=1 SV=2	NCAM1 (2)	NCAM1 (2)	NCAM1 (2;2)	Both		2	2		0.628377	0.431692	-0.143881		0.922481	0.762342	-0.0482548		1.53655	0.219901	-0.252826		0.79752	0.31566	0.225349		0.0104914	1	0.00368847		0.00707124	1	-0.00420503		0.792099	1	-0.236219		0.321358	1	-0.0727831			-0.0528466	0.0509473	-0.0811936	-0.0585351	-0.218866
6299	Q8NBS9	TXNDC5	Thioredoxin domain-containing protein 5 OS=Homo sapiens GN=TXNDC5 PE=1 SV=2	TXNDC5 (10)	TXNDC5 (16)	TXNDC5 (10;16)	Both	ER-Lumen	10	16		0.583028	0.791779	0.0413018		0.62968	0.424364	0.20423		0.357382	0.487082	0.126337		0.23073	0.399942	0.225223		0.15722	1	0.0539412		0.0393433	1	-0.0158012		0.140223	0.980596	-0.140315		0.0121887	1	0.0149061			-0.00701258	0.00697421	0.0605647	0.283517	0.0219668
5205	P21912	SDHB	Succinate dehydrogenase [ubiquinone] iron-sulfur subunit, mitochondrial OS=Homo sapiens GN=SDHB PE=1 SV=3	SDHB (7)	SDHB (5)	SDHB (7;5)	Both	Mitochondrion-IM	7	5		0.930884	0.496626	-0.100933		0.15338	0.889412	-0.0244816		0.0765582	0.916993	-0.0163465		1.81136	0.260742	0.225216		0.199166	1	0.036422		0.37149	1	-0.0691737		0.117824	0.994143	0.0121695		0.747263	1	-0.0982314			-0.051604	0.0497907	-0.0854151	0.010209	0.036963
5717	Q9H169	STMN4	Stathmin-4 OS=Homo sapiens GN=STMN4 PE=2 SV=1	STMN4 (3)	STMN4 (1)	STMN4 (3;1)	Both		3	1		1.05087	0.170851	-0.479408		0.405113	0.425176	0.194038		1.00794	0.105588	-0.455604		0.481599	0.31498	0.225057		0.461436	1	-0.113945		0.718217	1	-0.2107		1.23435	0.97847	-0.115396		1.37847	1	-0.208989			-0.357862	0.286338	-0.433898	0.121389	-0.424856
783	Q9ULU8	CADPS	Calcium-dependent secretion activator 1 OS=Homo sapiens GN=CADPS PE=1 SV=3	CADPS (43)	CADPS (34)	CADPS (43;34)	Both		43	34		1.78966	0.533058	-0.0911135		0.0727857	0.935774	0.0178728		0.690774	0.547143	0.0997131		1.03765	0.315118	0.225056		0.356056	1	0.039981		0.00686178	1	-0.00101777		1.03739	1	-0.158329		0.47385	1	-0.0605296			0.0108721	-0.0109478	-0.0831503	0.0901203	0.133712
2227	P23378	GLDC	Glycine dehydrogenase (decarboxylating), mitochondrial OS=Homo sapiens GN=GLDC PE=1 SV=2	GLDC (30)	GLDC (29)	GLDC (30;29)	Both		30	29		1.95358	0.734244	0.0452498		0.461669	0.720566	0.0673306		4.4194	0.177444	0.273425		0.654463	0.33731	0.225004		0.24418	1	0.0879336		0.116879	1	0.0206935		0.0758734	0.984222	-0.0213956		0.370766	1	-0.115714			0.0142257	-0.0143584	0.0498328	0.109145	0.275467
3508	Q5HYI7	MTX3	Metaxin-3 OS=Homo sapiens GN=MTX3 PE=1 SV=2	MTX3 (5)	MTX3 (5)	MTX3 (5;5)	Both		5	5		0.649776	0.631572	-0.0657899		0.638036	0.556733	-0.121622		1.10959	0.340523	0.163171		0.454757	0.347899	0.224477		0.0952585	1	0.0271312		0.170769	1	0.0463738		0.0508206	0.970209	-0.033505		0.179249	1	-0.0972436			-0.0129902	0.0128659	-0.0907732	-0.0644892	0.205014
4922	Q8TDP1	RNASEH2C	Ribonuclease H2 subunit C OS=Homo sapiens GN=RNASEH2C PE=1 SV=1	RNASEH2C (3)	RNASEH2C (2)	RNASEH2C (3;2)	Both		3	2		0.265091	0.513325	-0.11992		0.11526	0.950308	-0.0111963		1.74455	0.419928	0.122407		0.418179	0.352603	0.224457		1.09304	1	-0.0447342		0.017417	1	0.00820867		0.32284	1	-0.163934		0.171979	1	-0.0933966			-0.0387323	0.0376959	-0.259166	0.00982554	0.114445
4966	Q9BWH6	RPAP1	RNA polymerase II-associated protein 1 OS=Homo sapiens GN=RPAP1 PE=1 SV=3	RPAP1 (10)	RPAP1 (9)	RPAP1 (10;9)	Both		10	9		0.819411	0.488478	0.113214		0.126545	0.952573	0.0102775		0.671174	0.490113	0.113845		0.849024	0.316895	0.224386		0.763608	1	0.130474		0.4214	1	0.0663789		0.18101	0.961701	0.0575319		0.0176646	1	-0.00886933			-0.0418265	0.0406227	0.149573	0.0325035	0.159635
865	P13994	CCDC130	Coiled-coil domain-containing protein 130 OS=Homo sapiens GN=CCDC130 PE=1 SV=2	CCDC130 (4)	CCDC130 (3)	CCDC130 (4;3)	Both		4	3		2.43213	0.194987	0.358972		0.337449	0.743339	-0.0562668		2.23359	0.156946	0.304903		0.845979	0.304586	0.224038		1.09952	1	0.241024		0.260431	1	0.0276327		0.825073	1	0.238879		0.128984	1	0.0355588			0.0366063	-0.0375353	0.354043	-0.00967864	0.335122
5090	Q9Y3I0	RTCB	tRNA-splicing ligase RtcB homolog OS=Homo sapiens GN=RTCB PE=1 SV=1	RTCB (33)	RTCB (33)	RTCB (33;33)	Both		33	33		0.544714	0.807555	0.0354847		0.0604623	0.932495	-0.0186907		1.90165	0.403599	0.131251		3.56712	0.252923	0.223848		0.16742	1	-0.0274675		0.395309	1	-0.0452866		1.08562	0.961675	-0.0490232		0.992217	1	-0.0595803			-0.0289971	0.0284079	0.015196	-0.10897	0.145906
4470	P30048	PRDX3	Thioredoxin-dependent peroxide reductase, mitochondrial OS=Homo sapiens GN=PRDX3 PE=1 SV=3	PRDX3 (14)	PRDX3 (10)	PRDX3 (14;10)	Both	Mitochondrion-Mtx	14	10		0.0966079	0.957438	-0.00838698		0.281479	0.861706	-0.0333336		1.47424	0.503821	0.101161		0.494708	0.348543	0.223743		1.02015	1	0.0867814		0.561054	1	-0.0289219		0.382153	1	-0.161555		0.0454996	1	0.0470086			0.0160314	-0.0162013	-0.0341329	0.00283733	0.11478
3908	Q5BJF6	ODF2	Outer dense fiber protein 2 OS=Homo sapiens GN=ODF2 PE=1 SV=1	ODF2 (4)	ODF2 (6)	ODF2 (4;6)	Both		4	6		1.00913	0.627075	0.0665751		0.695638	0.751071	0.0516341		2.25108	0.301482	0.177375		2.40483	0.260645	0.22365		0.266731	1	-0.0410087		0.321873	1	0.0194033		0.010065	0.998402	0.0025478		0.67651	1	-0.0847136			-0.0710495	0.0676723	0.0557455	0.0324366	0.186389
4577	Q5VWC4	PSMD4	26S proteasome non-ATPase regulatory subunit 4 OS=Homo sapiens GN=PSMD4 PE=1 SV=1	PSMD4 (4)	PSMD4 (2)	PSMD4 (4;2)	Both		4	2		0.234546	0.82765	0.0307012		0.82199	0.446579	0.167089		0.429263	0.43289	-0.13943		1.73227	0.265898	0.223349		0.392857	1	0.293636		0.810794	1	0.294355		0.493308	1	-0.173047		1.35857	1	-0.203854			0.108485	-0.117234	0.00837938	0.102907	-0.0414764
4550	P25788	PSMA3	Proteasome subunit alpha type-3 OS=Homo sapiens GN=PSMA3 PE=1 SV=2	PSMA3 (16)	PSMA3 (11)	PSMA3 (16;11)	Both	Proteasome	16	11		1.57177	0.516367	0.0908801		1.6112	0.593195	-0.0951991		1.77471	0.390268	0.134042		0.927761	0.311047	0.223231		0.0995635	1	-0.0270084		0.178124	1	-0.0524878		0.470614	0.967463	-0.0886411		0.191716	1	0.0737135			0.0234285	-0.0237999	0.0764767	-0.0946991	0.153518
5501	E5RGY9	SNAP91	Clathrin coat assembly protein AP180 (Fragment) OS=Homo sapiens GN=SNAP91 PE=1 SV=8	SNAP91 (1)	SNAP91 (1)	SNAP91 (1;1)	Both		1	1		0.858981	0.149034	-0.597085		0.00695632	0.991961	0.00248124		0.832912	0.145695	-0.374532		0.844023	0.291064	0.223132		0.306915	1	-0.140469		0.554551	1	-0.466228		0.955644	1	-0.211643		0.857838	1	-0.251593			-0.204982	0.179341	-0.414424	-0.0314423	-0.525351
1	A0A0B4J2A0	A0A0B4J2A0	Uncharacterized protein OS=Homo sapiens PE=1 SV=1	A0A0B4J2A0 (9)	A0A0B4J2A0 (6)	A0A0B4J2A0 (9;6)	Both		9	6		1.05046	0.515632	0.092563		0.103315	0.94505	-0.012321		0.983816	0.554985	0.0854982		2.0924	0.264299	0.223121		0.513266	1	0.0650447		0.504366	1	-0.0278433		1.06457	0.963512	-0.0565292		1.77834	1	-0.0755631			-0.0363082	0.0353947	0.109101	0.00796519	0.0808421
5999	P49755	TMED10	Transmembrane emp24 domain-containing protein 10 OS=Homo sapiens GN=TMED10 PE=1 SV=2	TMED10 (15)	TMED10 (13)	TMED10 (15;13)	Both	Ergic/cisGolgi	15	13		0.671795	0.544374	-0.0907184		0.402211	0.871869	0.0273018		0.0567068	0.954823	-0.0101985		2.57264	0.258889	0.222923		0.36141	1	0.0599978		0.139473	1	0.0229887		0.314505	0.968915	0.0340507		0.109148	1	-0.0142893			-0.015355	0.0151836	-0.0500068	0.0259575	0.0389953
5754	Q96I99	SUCLG2	Succinate--CoA ligase [GDP-forming] subunit beta, mitochondrial OS=Homo sapiens GN=SUCLG2 PE=1 SV=2	SUCLG2 (7)	SUCLG2 (6)	SUCLG2 (7;6)	Both	Mitochondrion-Mtx	7	6		0.547859	0.852226	0.0261746		0.40147	0.93624	0.0138452		1.24582	0.32403	0.180089		1.51702	0.29029	0.222713		0.349496	1	0.0916758		0.349421	1	-0.033393		0.000975584	1	0.000280477		0.390295	1	-0.109877			-0.0318144	0.0311085	0.040364	0.00925474	0.208772
2636	O43837	IDH3B	Isocitrate dehydrogenase [NAD] subunit beta, mitochondrial OS=Homo sapiens GN=IDH3B PE=1 SV=2	IDH3B (10)	IDH3B (12)	IDH3B (10;12)	Both	Mitochondrion-Mtx	10	12		0.696415	0.548359	0.0927285		0.407919	0.739292	0.0610674		0.619254	0.497761	0.111987		0.330944	0.374285	0.222706		0.0076698	1	-0.00308682		0.135598	1	0.0336189		0.054581	0.965403	-0.0425894		0.0698495	1	0.0832995			-0.03518	0.0343211	0.0545442	0.0149486	0.0613625
625	Q13867	BLMH	Bleomycin hydrolase OS=Homo sapiens GN=BLMH PE=1 SV=1	BLMH (13)	BLMH (13)	BLMH (13;13)	Both		13	13		0.50973	0.783315	0.041697		0.262483	0.609914	0.113386		0.44923	0.34436	0.194815		1.76617	0.284568	0.2227		0.157254	1	0.14629		0.0542133	1	0.0302351		0.98261	0.994305	-0.12409		0.198957	1	-0.0131925			0.0263321	-0.0268046	0.0664226	0.24473	0.317184
3154	Q9UQF2	MAPK8IP1	C-Jun-amino-terminal kinase-interacting protein 1 OS=Homo sapiens GN=MAPK8IP1 PE=1 SV=1	MAPK8IP1 (6)	MAPK8IP1 (7)	MAPK8IP1 (6;7)	Both		6	7		0.855518	0.548524	0.0861446		0.0415098	0.947495	-0.0142808		1.06308	0.289895	0.203405		0.792328	0.317718	0.222588		0.248085	1	-0.0432889		0.889369	1	-0.187749		0.570618	1	-0.141425		0.524244	1	-0.137119			-0.040287	0.0391679	0.0546027	-0.113117	0.251439
6411	Q9BRT2	UQCC2	Ubiquinol-cytochrome-c reductase complex assembly factor 2 OS=Homo sapiens GN=UQCC2 PE=1 SV=1	UQCC2 (2)	UQCC2 (2)	UQCC2 (2;2)	Both	Mitochondrion-IM	2	2		0.374028	0.800045	0.0350051		0.330834	0.793048	-0.0451625		0.0955929	0.810115	-0.0446297		0.900034	0.307314	0.222449		0.00450367	0.998825	0.00236555		0.251117	1	0.113502		0.141472	0.960527	-0.0550189		0.190775	1	-0.0409236			0.0412198	-0.042405	0.0535806	-0.0867641	0.0927678
2185	P31150	GDI1	Rab GDP dissociation inhibitor alpha OS=Homo sapiens GN=GDI1 PE=1 SV=2	GDI1 (79)	GDI1 (72)	GDI1 (79;72)	Both		79	72		0.68794	0.716962	0.05371		0.700723	0.899074	0.0216411		0.526773	0.489674	-0.119557		0.529942	0.348037	0.222416		0.1838	1	0.0371363		0.19429	1	-0.0392477		0.279853	0.974455	-0.102202		0.155136	1	0.100242			-0.0231469	0.0227669	0.0755931	0.0123816	-0.0579216
3111	Q5SRI9	MANEA	Glycoprotein endo-alpha-1,2-mannosidase OS=Homo sapiens GN=MANEA PE=1 SV=1	MANEA (1)	MANEA (1)	MANEA (1;1)	Both		1	1		0.556203	0.348165	0.180516		0.776674	0.409673	-0.183369		0.303028	0.649112	0.0692174		1.06019	0.284197	0.222301		0.155473	1	0.06841		0.561178	1	0.0335626		0.424852	0.966675	0.0516676		0.445641	1	-0.489475			0.0227924	-0.0231436	0.270715	-0.131502	0.0637116
2295	Q9BQQ3	GORASP1	Golgi reassembly-stacking protein 1 OS=Homo sapiens GN=GORASP1 PE=1 SV=3	GORASP1 (3)	GORASP1 (4)	GORASP1 (3;4)	Both		3	4		0.111239	0.761248	0.0545938		0.43249	0.563901	-0.133586		0.102397	0.918438	0.0178121		0.485233	0.350829	0.222239		0.383785	1	0.0706339		0.0416024	1	0.00781148		0.0600403	0.981184	-0.0260393		0.146327	1	-0.0935364			0.00875208	-0.00880005	0.201861	-0.045887	-0.0342063
4624	P23468	PTPRD	Receptor-type tyrosine-protein phosphatase delta OS=Homo sapiens GN=PTPRD PE=1 SV=2	PTPRD (11)	PTPRD (14)	PTPRD (11;14)	Both		11	14		2.11459	0.306974	-0.183891		0.468988	0.871937	-0.0265224		0.302187	0.635898	-0.0806159		1.29565	0.292626	0.222066		0.664309	1	-0.228985		0.0869197	1	0.0269486		1.04834	1	-0.247642		0.0348239	1	-0.0082797			0.00781074	-0.00784815	-0.163624	-0.038502	0.000685532
4933	Q8NC42	RNF149	E3 ubiquitin-protein ligase RNF149 OS=Homo sapiens GN=RNF149 PE=2 SV=2	RNF149 (1)	RNF149 (1)	RNF149 (1;1)	Both		1	1		0.446632	0.527609	0.106274		0.124429	0.687722	0.0903612		0.568331	0.444796	-0.135503		0.437737	0.356407	0.221579		0.155482	1	-0.0379506		0.0844086	1	0.0191313		0.444246	1	-0.22236		0.611071	1	-0.378937			-0.025342	0.0248887	0.174503	0.309207	-0.0719584
492	P13637	ATP1A3	Sodium/potassium-transporting ATPase subunit alpha-3 OS=Homo sapiens GN=ATP1A3 PE=1 SV=3	ATP1A3 (21)	ATP1A3 (13)	ATP1A3 (21;13)	Both		21	13		0.546298	0.536223	-0.101043		3.95116	0.358753	0.195562		1.41445	0.578996	-0.0811944		0.566741	0.348199	0.221496		0.390572	1	-0.117052		0.111971	1	-0.0296208		0.682632	1	-0.297188		0.0309366	1	-0.0119083			0.02193	-0.0222545	-0.0504379	0.201221	-0.0665776
5447	O95391	SLU7	Pre-mRNA-splicing factor SLU7 OS=Homo sapiens GN=SLU7 PE=1 SV=2	SLU7 (13)	SLU7 (12)	SLU7 (13;12)	Both		13	12		1.1659	0.258545	-0.246518		0.136926	0.966441	-0.00715291		3.53434	0.194319	0.255192		2.65902	0.261809	0.221132		2.12158	1	-0.285325		0.576876	1	0.0478336		1.27911	1	-0.295134		0.176922	1	-0.00984944			-0.039301	0.0382346	-0.204126	-0.0103631	0.244106
3685	Q92692	NECTIN2	Nectin-2 OS=Homo sapiens GN=NECTIN2 PE=1 SV=1	NECTIN2 (3)	NECTIN2 (6)	NECTIN2 (3;6)	Both	Plasma membrane	3	6		0.203207	0.807549	0.03643		0.405663	0.833198	0.0351379		0.85153	0.499401	0.100169		2.19004	0.266332	0.220949		0.896633	1	0.121052		0.331961	1	-0.0415082		0.0798301	0.991475	0.0163369		0.743164	1	0.12278			0.0360388	-0.0369385	0.0882435	0.0338073	0.134608
112	O14672	ADAM10	Disintegrin and metalloproteinase domain-containing protein 10 OS=Homo sapiens GN=ADAM10 PE=1 SV=1	ADAM10 (6)	ADAM10 (6)	ADAM10 (6;6)	Both	ER-Membrane	6	6		0.734668	0.518158	0.0998112		0.146697	0.955686	0.0089871		0.0648578	0.963551	0.00796183		1.12791	0.303354	0.220853		0.447485	1	-0.155858		0.849899	1	0.121109		0.616355	0.97625	-0.0950613		0.216994	1	0.0345408			0.0336767	-0.0344596	0.138852	0.0139758	0.0409445
3221	Q9HAF1	MEAF6	Chromatin modification-related protein MEAF6 OS=Homo sapiens GN=MEAF6 PE=1 SV=1	MEAF6 (6)	MEAF6 (8)	MEAF6 (6;8)	Both		6	8		0.344477	0.286181	0.274856		1.50052	0.558503	-0.110475		0.3502	0.772886	0.0442048		0.822883	0.317012	0.220685		0.102427	1	0.0289005		0.103137	1	-0.0133757		0.0687526	0.973854	0.0282335		0.317225	1	-0.0718753			0.000978765	-0.000978827	0.0359339	-0.115815	0.0051076
2676	Q12905	ILF2	Interleukin enhancer-binding factor 2 OS=Homo sapiens GN=ILF2 PE=1 SV=2	ILF2 (32)	ILF2 (34)	ILF2 (32;34)	Both		32	34		0.290034	0.664123	-0.0619116		0.177101	0.85564	0.0309008		0.066729	0.885738	0.0244902		1.30075	0.278909	0.220662		0.0252902	1	-0.00907513		0.0744722	1	-0.0281609		0.125669	0.964383	0.039995		0.118859	1	-0.0188571			-0.150297	0.136024	-0.123377	0.00385397	-0.0808888
3864	A8MXV4	NUDT19	Nucleoside diphosphate-linked moiety X motif 19 OS=Homo sapiens GN=NUDT19 PE=1 SV=1	NUDT19 (4)	NUDT19 (2)	NUDT19 (4;2)	Both		4	2		2.03289	0.241963	0.251683		0.183895	0.754844	0.0602218		0.443411	0.492349	0.11215		1.59244	0.273539	0.220573		0.375575	1	0.101725		0.374897	1	0.102251		0.133257	0.975507	-0.0251086		0.841642	1	0.131731			-0.00611445	0.00608462	0.275813	0.157158	0.188651
1642	O14576	DYNC1I1	Cytoplasmic dynein 1 intermediate chain 1 OS=Homo sapiens GN=DYNC1I1 PE=1 SV=2	DYNC1I1 (9)	DYNC1I1 (7)	DYNC1I1 (9;7)	Both		9	7		1.58994	0.227459	-0.284264		1.02715	0.437639	0.164456		1.33288	0.234604	-0.230912		0.523289	0.337122	0.220504		1.24136	1	-0.227832		0.0967999	1	-0.0350451		0.409724	1	-0.175419		0.0838487	1	0.0376333			-0.158136	0.142416	-0.28835	0.182574	-0.278408
2988	Q68DH5	LMBRD2	LMBR1 domain-containing protein 2 OS=Homo sapiens GN=LMBRD2 PE=1 SV=1	LMBRD2 (6)	LMBRD2 (7)	LMBRD2 (6;7)	Both	Endosome	6	7		0.162375	0.519019	0.126897		0.208733	0.663922	0.0904111		0.160104	0.749653	0.0552476		0.232436	0.405747	0.220425		0.67488	1	0.245859		0.0997094	1	0.043404		0.221976	1	-0.210366		0.13687	1	-0.134157			0.0739608	-0.0779075	-0.112698	0.221944	-0.050828
292	E5RK69	ANXA6	Annexin OS=Homo sapiens GN=ANXA6 PE=1 SV=1	ANXA6 (2)	ANXA6 (1)	ANXA6 (2;1)	Both		2	1		0.780601	0.397571	0.162596		0.249159	0.593846	-0.125083		0.585693	0.21422	0.311048		0.248157	0.399988	0.220136		0.0437385	1	0.0211188		0.152803	1	-0.0693416		0.108276	0.965072	0.102513		0.0652914	1	0.0630015			0.025121	-0.0255499	0.210645	0.0278191	0.446537
4564	P17980	PSMC3	26S protease regulatory subunit 6A OS=Homo sapiens GN=PSMC3 PE=1 SV=3	PSMC3 (31)	PSMC3 (28)	PSMC3 (31;28)	Both	Proteasome	31	28		0.38378	0.928447	-0.0129617		0.329612	0.828762	-0.0409229		0.0466786	0.969916	0.00717253		2.3723	0.27628	0.220118		0.277468	1	0.0590829		0.00111819	0.999998	-0.000267416		0.207494	0.994375	0.00925455		0.153639	1	-0.0217584			-0.0135981	0.0134626	-0.0224653	-0.0788827	0.0512435
496	O14983	ATP2A1	Sarcoplasmic/endoplasmic reticulum calcium ATPase 1 OS=Homo sapiens GN=ATP2A1 PE=1 SV=1	ATP2A1 (2)	ATP2A1 (3)	ATP2A1 (2;3)	Both		2	3		0.0321234	0.937449	-0.0124885		0.0736296	0.80111	-0.0533882		0.542536	0.37201	-0.15346		0.735954	0.297451	0.220074		0.430105	1	0.476957		0.830941	1	0.463303		0.365186	1	-0.19823		1.29009	1	-0.400956			0.160798	-0.180873	0.0296101	0.134786	-0.142894
6179	Q13049	TRIM32	E3 ubiquitin-protein ligase TRIM32 OS=Homo sapiens GN=TRIM32 PE=1 SV=2	TRIM32 (4)	TRIM32 (4)	TRIM32 (4;4)	Both		4	4		0.503669	0.743024	-0.0455662		0.253768	0.818055	0.0400116		0.705707	0.667108	-0.0619161		0.824369	0.315277	0.220068		0.0435161	1	0.0125557		0.0484325	1	0.0118319		0.166153	0.961427	0.0576072		0.231322	1	-0.0602305			-0.0468885	0.0453839	-0.0391507	-0.0071416	-0.0586742
6697	Q9NQZ6	ZC4H2	Zinc finger C4H2 domain-containing protein OS=Homo sapiens GN=ZC4H2 PE=1 SV=1	ZC4H2 (2)	ZC4H2 (1)	ZC4H2 (2;1)	Both		2	1		1.16891	0.421563	0.131606		0.447302	0.280785	0.371216		0.190505	0.793684	-0.0442811		0.155515	0.450478	0.220033		0.0115394	1	-0.00722104		0.376181	1	-0.274264		0.129886	0.998996	-0.185365		0.1714	1	-0.245651			-0.0180739	0.0178391	0.163089	0.135328	-0.116028
3381	Q7Z7H8	MRPL10	39S ribosomal protein L10, mitochondrial OS=Homo sapiens GN=MRPL10 PE=1 SV=3	MRPL10 (4)	MRPL10 (2)	MRPL10 (4;2)	Both	Mitochondrion-Mtx	4	2		0.29439	0.68311	0.0595479		0.357763	0.661248	0.0806505		0.203879	0.739868	-0.054219		0.34028	0.370892	0.219957		0.0364039	1	-0.019275		0.00517272	1	-0.0017123		0.37684	1	-0.244174		0.296476	1	-0.192695			-0.0131421	0.0130149	-0.00281233	0.00891037	0.0234359
6635	P13010	XRCC5	X-ray repair cross-complementing protein 5 OS=Homo sapiens GN=XRCC5 PE=1 SV=3	XRCC5 (61)	XRCC5 (56)	XRCC5 (61;56)	Both		61	56		0.17316	0.874287	0.025534		0.184092	0.964303	-0.00755693		0.895707	0.337223	0.180983		3.04356	0.261529	0.21973		0.340222	1	0.0519985		0.140164	1	-0.0210028		0.0754293	0.996179	-0.00757933		0.275625	1	-0.0118628			0.00144101	-0.00144159	0.0702705	-0.00570397	0.226178
3148	P53778	MAPK12	Mitogen-activated protein kinase 12 OS=Homo sapiens GN=MAPK12 PE=1 SV=3	MAPK12 (7)	MAPK12 (5)	MAPK12 (7;5)	Both		7	5		0.499024	0.598233	0.0765311		0.287483	0.649796	0.0902965		0.852662	0.479199	0.105198		0.56858	0.340131	0.219677		0.60649	1	0.0724159		0.454938	1	-0.0861844		0.129249	0.963236	0.049543		0.059752	1	-0.0267159			-0.10399	0.0969358	0.0287175	0.185719	0.138276
3597	P13591	NCAM1	Neural cell adhesion molecule 1 OS=Homo sapiens GN=NCAM1 PE=1 SV=3	NCAM1 (55)	NCAM1 (51)	NCAM1 (55;51)	Both		55	51		1.14427	0.498608	-0.0984174		0.561264	0.461453	0.176262		1.40129	0.425529	-0.122139		1.507	0.282138	0.219666		0.5839	1	-0.0972849		0.818887	1	-0.131234		0.991743	1	-0.211805		0.480627	1	-0.0630453			-0.0535842	0.051633	-0.119775	0.0838768	-0.12569
4148	P35080	PFN2	Profilin-2 OS=Homo sapiens GN=PFN2 PE=1 SV=3	PFN2 (12)	PFN2 (7)	PFN2 (12;7)	Both		12	7		0.25692	0.949202	-0.00892332		0.366992	0.606177	0.111983		1.36349	0.47789	0.107619		0.779378	0.334924	0.219653		0.325281	1	-0.0518956		0.886967	1	-0.0712855		0.767445	1	-0.174578		0.176266	1	-0.0376582			-0.00374436	0.00373235	-0.00674128	0.0212645	0.126695
2648	Q9H7X7	IFT22	Intraflagellar transport protein 22 homolog OS=Homo sapiens GN=IFT22 PE=1 SV=1	IFT22 (2)	IFT22 (1)	IFT22 (2;1)	Both		2	1		0.313504	0.414923	0.149716		0.593263	0.336953	0.251447		0.476925	0.262247	0.241423		0.604389	0.312431	0.219507		0.138589	1	-0.100501		0.11522	1	-0.0562821		1.71248	1	-0.220176		0.166459	1	0.118921			0.0143313	-0.0144659	0.00806832	0.118939	0.0718522
5118	Q9NTJ5	SACM1L	Phosphatidylinositide phosphatase SAC1 OS=Homo sapiens GN=SACM1L PE=1 SV=2	SACM1L (18)	SACM1L (16)	SACM1L (18;16)	Both	ER-Membrane	18	16		0.506886	0.932578	0.0120851		0.227949	0.897581	-0.0254864		3.02044	0.308598	0.171519		2.46229	0.27594	0.21915		0.577571	1	0.0459791		0.483425	1	-0.0277167		0.170561	0.972939	0.0284043		0.83124	1	-0.0721885			-0.0239355	0.02353	0.0146738	0.00882285	0.161876
1836	P84090	ERH	Enhancer of rudimentary homolog OS=Homo sapiens GN=ERH PE=1 SV=1	ERH (8)	ERH (7)	ERH (8;7)	Both		8	7		0.538701	0.293194	-0.214425		0.861013	0.285763	0.297591		0.13651	0.697932	-0.0620142		0.613565	0.308053	0.219146		0.121657	1	-0.0329324		0.447693	1	-0.125636		0.0274011	0.995742	0.0103619		0.33375	1	0.0686611			-0.232016	0.199703	-0.14016	0.215448	-0.00243897
6304	Q16881	TXNRD1	Thioredoxin reductase 1, cytoplasmic OS=Homo sapiens GN=TXNRD1 PE=1 SV=3	TXNRD1 (26)	TXNRD1 (25)	TXNRD1 (26;25)	Both		26	25		1.26071	0.643749	0.0633043		0.233161	0.753307	0.0626077		0.743917	0.602618	0.0810388		1.39194	0.301158	0.2191		0.0891426	1	-0.0179593		0.442718	1	-0.0488336		0.334624	0.970399	-0.0305787		0.218395	1	0.0275316			0.0318435	-0.0325413	0.0775891	-0.0198106	0.0510751
800	P49069	CAMLG	Calcium signal-modulating cyclophilin ligand OS=Homo sapiens GN=CAMLG PE=1 SV=1	CAMLG (7)	CAMLG (3)	CAMLG (7;3)	Both		7	3		0.488907	0.314193	-0.219472		0.124297	0.880013	0.0270284		0.0175725	0.984401	0.00318085		1.53542	0.276393	0.21908		1.4502	1	-0.236387		0.598561	1	-0.159951		0.904264	1	-0.255187		0.121865	1	0.0200095			-0.0982848	0.0919573	-0.0872867	-0.0293567	0.0143427
2210	Q8N2G8	GHDC	GH3 domain-containing protein OS=Homo sapiens GN=GHDC PE=1 SV=2	GHDC (8)	GHDC (5)	GHDC (8;5)	Both	ER-Membrane	8	5		0.103723	0.914488	0.0181808		1.21961	0.707373	0.0600817		0.52361	0.576657	0.0905285		3.06346	0.261907	0.218975		0.109424	1	0.0411252		0.364064	1	-0.0627911		0.158368	0.965282	-0.042691		0.932489	1	0.0992238			-0.00117882	0.00117708	-0.0338764	0.0483542	0.14129
3375	Q9Y605	MRFAP1	MORF4 family-associated protein 1 OS=Homo sapiens GN=MRFAP1 PE=1 SV=1	MRFAP1 (1)	MRFAP1 (2)	MRFAP1 (1;2)	Both		1	2		0.145022	0.474572	-0.162006		0.385534	0.279436	0.385824		0.602828	0.347906	0.172596		1.02219	0.296598	0.218817		1.06542	1	-0.395205		0.695541	1	-0.212602		1.24741	1	-0.360002		0.435034	1	-0.258423			-0.0917483	0.0862078	0.17394	0.0867998	0.0816742
2916	O15230	LAMA5	Laminin subunit alpha-5 OS=Homo sapiens GN=LAMA5 PE=1 SV=8	LAMA5 (11)	LAMA5 (12)	LAMA5 (11;12)	Both		11	12		0.794375	0.721334	0.0496813		0.323781	0.917561	0.0182859		0.127542	0.685199	-0.0768527		2.51972	0.270536	0.218591		0.281199	1	0.166187		0.188557	1	0.112758		0.53964	0.995097	-0.135695		0.563967	1	-0.214999			0.00102878	-0.00102882	0.0686043	0.0337302	-0.259035
1318	Q2VPK5	CTU2	Cytoplasmic tRNA 2-thiolation protein 2 OS=Homo sapiens GN=CTU2 PE=1 SV=1	CTU2 (3)	CTU2 (2)	CTU2 (3;2)	Both		3	2		0.554221	0.196184	0.483671		0.250817	0.647059	0.0844679		0.0550701	0.879674	-0.0255019		0.735419	0.300744	0.218567		1.07827	1	0.424031		0.0226887	1	0.0123586		0.286424	0.964174	-0.0849621		0.559797	1	-0.0998909			-0.0620595	0.0594628	0.205719	0.113421	0.0572382
2668	O75054	IGSF3	Immunoglobulin superfamily member 3 OS=Homo sapiens GN=IGSF3 PE=2 SV=3	IGSF3 (10)	IGSF3 (9)	IGSF3 (10;9)	Both	Plasma membrane	10	9		0.00339399	0.997865	0.000361566		0.871647	0.546182	0.123639		0.470798	0.587424	-0.0861074		2.16528	0.269286	0.21848		0.0793257	1	0.0175489		0.653087	1	0.140272		1.18635	1	-0.197598		0.39196	1	0.142691			0.059544	-0.0620677	0.0130011	0.165205	-0.030381
3496	P03897	MT-ND3	NADH-ubiquinone oxidoreductase chain 3 OS=Homo sapiens GN=MT-ND3 PE=1 SV=1	MT-ND3 (1)	MT-ND3 (1)	MT-ND3 (1;1)	Both		1	1		0.257561	0.234156	-0.459953		0.299746	0.306364	0.390182		0.464871	0.194902	0.353943		1.12737	0.287357	0.218245		0.192936	1	0.387778		0.0233647	1	0.0297977		1.64278	1	-0.496265		0.771532	1	-0.179141			0.149965	-0.16727	-1.0092	0.780972	0.573002
4851	Q96HR9	REEP6	Receptor expression-enhancing protein 6 OS=Homo sapiens GN=REEP6 PE=1 SV=2	REEP6 (2)	REEP6 (2)	REEP6 (2;2)	Both	ER_high_curvature	2	2		0.120396	0.804271	-0.0418621		0.117331	0.688944	0.0904767		0.106659	0.593931	0.112152		0.178543	0.439781	0.218018		0.0108205	1	-0.0123419		0.0455122	1	0.0551722		0.0780571	0.963231	-0.104975		0.0116798	1	0.0201186			0.0322731	-0.0329906	-0.14695	-0.142253	-0.2036
2682	Q16891	IMMT	MICOS complex subunit MIC60 OS=Homo sapiens GN=IMMT PE=1 SV=1	IMMT (48)	IMMT (52)	IMMT (48;52)	Both	Mitochondrion-IM	48	52		0.111228	0.899262	0.0210993		0.239791	0.871554	-0.0293954		0.728729	0.622453	0.0734401		0.897911	0.320513	0.218001		0.168196	1	0.0179831		0.0606508	1	0.00641821		0.417052	0.963919	-0.0790328		0.129062	1	-0.0341506			0.0485421	-0.0502002	0.0767639	-0.0671322	0.10386
1969	Q658Y4	FAM91A1	Protein FAM91A1 OS=Homo sapiens GN=FAM91A1 PE=1 SV=3	FAM91A1 (7)	FAM91A1 (8)	FAM91A1 (7;8)	Both		7	8		1.67397	0.594678	0.0729829		0.314489	0.66409	-0.0880843		2.42649	0.49401	0.0968272		1.03508	0.319259	0.217725		0.0346647	1	0.00712895		0.183698	1	-0.047323		0.553183	0.965826	-0.0766117		0.15501	1	0.0416104			-0.0335888	0.032804	0.0609686	-0.00359685	0.09207
3808	Q96F24	NRBF2	Nuclear receptor-binding factor 2 OS=Homo sapiens GN=NRBF2 PE=1 SV=1	NRBF2 (4)	NRBF2 (2)	NRBF2 (4;2)	Both		4	2		0.876196	0.462395	0.125842		0.211389	0.958484	0.00839674		1.18754	0.680851	0.0590355		0.751625	0.340182	0.217643		0.0101186	1	-0.00295201		0.456841	1	-0.0688036		0.331134	0.969392	0.0710689		0.189243	1	0.0409379			-0.0292957	0.0286946	0.091791	-0.00069644	0.0444915
160	O00116	AGPS	Alkyldihydroxyacetonephosphate synthase, peroxisomal OS=Homo sapiens GN=AGPS PE=1 SV=1	AGPS (14)	AGPS (11)	AGPS (14;11)	Both	Peroxisome	14	11		1.69107	0.268504	0.21216		2.33147	0.299239	0.250046		1.59197	0.213285	0.253791		0.456068	0.355906	0.217504		0.0816734	1	0.023273		0.196397	1	0.0400792		0.057964	0.974565	-0.0286522		0.418398	1	0.202629			0.0291146	-0.0296955	0.177654	0.273694	0.292639
2631	O60725	ICMT	Protein-S-isoprenylcysteine O-methyltransferase OS=Homo sapiens GN=ICMT PE=1 SV=1	ICMT (3)	ICMT (3)	ICMT (3;3)	Both		3	3		2.09652	0.411089	0.133604		0.47273	0.681774	0.0776168		0.547506	0.460713	0.128521		1.82318	0.28741	0.21747		0.104512	1	0.0515954		0.239501	1	0.125066		0.0483864	0.990599	-0.0186219		0.715557	1	-0.0544466			0.000621411	-0.000621335	0.148184	0.125523	0.0638545
1595	Q9BQC3	DPH2	2-(3-amino-3-carboxypropyl)histidine synthase subunit 2 OS=Homo sapiens GN=DPH2 PE=1 SV=1	DPH2 (1)	DPH2 (1)	DPH2 (1;1)	Both		1	1		0.389182	0.161333	-0.831368		0.214741	0.365169	0.300759		0.426137	0.259944	0.248445		0.351006	0.340894	0.217408		1.31103	1	-0.547205		0.540656	1	-0.582579		0.614073	1	-0.643422		0.399575	1	-0.656824			-0.11626	0.10752	-0.233705	-0.178737	0.129209
2406	H0YHG0	H0YHG0	Uncharacterized protein (Fragment) OS=Homo sapiens PE=1 SV=1	H0YHG0 (20)	H0YHG0 (18)	H0YHG0 (20;18)	Both		20	18		0.23733	0.563565	0.0994454		0.210895	0.643315	-0.098209		0.785497	0.313068	0.188684		0.838162	0.312155	0.217227		0.187501	1	-0.0448758		0.405745	1	-0.0959808		0.507274	1	-0.132629		0.0895241	1	0.0373223			0.108591	-0.117357	0.226181	-0.243817	0.258607
2692	Q9UK53	ING1	Inhibitor of growth protein 1 OS=Homo sapiens GN=ING1 PE=1 SV=2	ING1 (2)	ING1 (1)	ING1 (2;1)	Both		2	1		0.317835	0.429606	0.159078		0.265809	0.635784	-0.0960417		0.962879	0.0645063	0.667274		1.48412	0.282918	0.217057		0.156519	1	-0.112819		0.0895686	1	-0.0704276		0.565254	1	-0.270022		0.767236	1	0.250066			0.0653154	-0.0683689	0.00297704	-0.210229	0.51966
666	Q8WUW1	BRK1	Protein BRICK1 OS=Homo sapiens GN=BRK1 PE=1 SV=1	BRK1 (3)	BRK1 (1)	BRK1 (3;1)	Both		3	1		0.199647	0.662678	0.0664497		0.906288	0.338885	0.243076		0.481617	0.265537	0.252707		0.160576	0.447936	0.216936		0.236785	1	-0.123999		0.0633443	1	-0.0357024		0.120455	0.977458	-0.164539		0.0276441	1	0.0503172			0.155918	-0.174716	-0.0346561	0.155839	0.0869168
4338	Q9UHN1	POLG2	DNA polymerase subunit gamma-2, mitochondrial OS=Homo sapiens GN=POLG2 PE=1 SV=1	POLG2 (2)	POLG2 (3)	POLG2 (2;3)	Both		2	3		0.00262719	0.995382	-0.0011428		0.224901	0.707119	0.075217		0.680636	0.203905	0.31532		0.313352	0.383857	0.216768		0.494492	1	-0.184999		0.380025	1	-0.13966		0.0324773	0.983196	-0.0239046		0.135738	1	-0.0935004			0.0501144	-0.0518845	-0.12178	-0.0278846	0.202082
3018	O94898	LRIG2	Leucine-rich repeats and immunoglobulin-like domains protein 2 OS=Homo sapiens GN=LRIG2 PE=2 SV=3	LRIG2 (7)	LRIG2 (4)	LRIG2 (7;4)	Both		7	4		0.833039	0.354911	0.182013		2.42364	0.526645	0.122864		0.189547	0.87266	0.0268148		0.589004	0.34909	0.216315		0.671225	1	0.10056		0.543079	1	0.0829537		0.294134	0.969263	0.0919881		0.124745	1	0.0399669			0.0414767	-0.042677	0.233378	0.133241	0.069709
6376	P15374	UCHL3	Ubiquitin carboxyl-terminal hydrolase isozyme L3 OS=Homo sapiens GN=UCHL3 PE=1 SV=1	UCHL3 (8)	UCHL3 (4)	UCHL3 (8;4)	Both		8	4		0.0618518	0.9486	0.00939121		0.401588	0.611821	0.100788		0.443857	0.593667	0.0819487		0.312913	0.382845	0.21628		0.197618	1	0.0973821		0.297584	1	0.0780067		0.153681	0.968008	-0.106067		0.0598221	1	0.0659214			0.0969165	-0.103831	-0.0249343	0.177162	0.137533
6006	Q9BVK6	TMED9	Transmembrane emp24 domain-containing protein 9 OS=Homo sapiens GN=TMED9 PE=1 SV=2	TMED9 (13)	TMED9 (6)	TMED9 (13;6)	Both	Ergic/cisGolgi	13	6		0.25184	0.836598	-0.0310912		1.46603	0.591543	-0.0966507		1.17693	0.669587	0.0594789		0.629633	0.347928	0.216189		0.213532	1	-0.0387936		0.212449	1	0.0456034		0.212217	0.963363	0.0617186		0.21399	1	-0.0877426			-0.013173	0.0130454	0.00625604	-0.115693	0.0703093
1350	P08574	CYC1	Cytochrome c1, heme protein, mitochondrial OS=Homo sapiens GN=CYC1 PE=1 SV=3	CYC1 (13)	CYC1 (14)	CYC1 (13;14)	Both	Mitochondrion-IM	13	14		0.843513	0.688644	0.0554619		1.01439	0.556242	0.123597		2.23522	0.530854	0.0875508		0.908452	0.330895	0.215921		0.125949	1	0.0248841		0.230885	1	-0.0285877		0.200567	0.961224	-0.0512129		0.247894	1	-0.0644567			-0.0319912	0.0312775	0.0354841	0.152746	0.0928971
1162	Q13057	COASY	Bifunctional coenzyme A synthase OS=Homo sapiens GN=COASY PE=1 SV=4	COASY (4)	COASY (2)	COASY (4;2)	Both		4	2		0.834463	0.443576	0.132021		0.111269	0.92729	0.0184356		0.68843	0.374702	0.162431		0.635896	0.347755	0.215764		0.536463	1	0.121729		0.511156	1	0.118251		0.588903	1	0.180046		0.046869	1	0.0167008			0.00561735	-0.00563577	0.0884264	0.0666112	0.224622
4427	Q15435	PPP1R7	Protein phosphatase 1 regulatory subunit 7 OS=Homo sapiens GN=PPP1R7 PE=1 SV=1	PPP1R7 (15)	PPP1R7 (13)	PPP1R7 (15;13)	Both		15	13		0.938656	0.629607	0.0680317		0.402566	0.646532	0.0916538		1.02656	0.584887	-0.0806489		0.840612	0.334896	0.21562		0.0707696	1	-0.0116746		0.439496	1	-0.0713344		0.269004	0.965752	-0.066156		0.169532	1	-0.0326023			-0.0179943	0.0177615	0.0459434	0.0234424	-0.0580065
2265	P62879	GNB2	Guanine nucleotide-binding protein G(I)/G(S)/G(T) subunit beta-2 OS=Homo sapiens GN=GNB2 PE=1 SV=3	GNB2 (19)	GNB2 (16)	GNB2 (19;16)	Both	Plasma membrane	19	16		0.0806228	0.829427	-0.0377765		1.41412	0.22715	0.380656		1.84803	0.358188	0.146302		0.436017	0.361488	0.215581		0.178269	1	0.141398		0.15944	1	-0.0601716		0.385757	1	-0.186653		0.0790482	1	-0.0426079			0.0498854	-0.0516392	-0.176789	0.434565	0.132324
414	Q8N2F6	ARMC10	Armadillo repeat-containing protein 10 OS=Homo sapiens GN=ARMC10 PE=1 SV=1	ARMC10 (8)	ARMC10 (3)	ARMC10 (8;3)	Both		8	3		0.171429	0.608348	0.0923096		1.04401	0.606567	0.0903858		0.192747	0.688708	0.0693717		0.853122	0.319242	0.215488		0.0691231	1	-0.0308733		0.062086	1	-0.0397598		0.189473	0.963065	0.043126		0.0941793	1	-0.0219553			-0.0932345	0.0875195	-0.0734719	0.0820847	-0.042293
1664	Q9NTX5	ECHDC1	Ethylmalonyl-CoA decarboxylase OS=Homo sapiens GN=ECHDC1 PE=1 SV=2	ECHDC1 (8)	ECHDC1 (9)	ECHDC1 (8;9)	Both		8	9		2.0431	0.312286	0.183292		0.0604434	0.938436	0.0165028		0.356191	0.545046	0.10482		0.849053	0.335139	0.215272		0.0158619	1	-0.00505797		0.471131	1	-0.140587		0.35265	0.960441	-0.0668321		0.36416	1	-0.0815434			-0.0329557	0.0321995	0.163336	-0.0631846	0.016246
477	O95352	ATG7	Ubiquitin-like modifier-activating enzyme ATG7 OS=Homo sapiens GN=ATG7 PE=1 SV=1	ATG7 (8)	ATG7 (10)	ATG7 (8;10)	Both		8	10		0.332222	0.65732	-0.0718383		0.147445	0.950788	-0.0120976		0.658499	0.543055	0.0992407		0.610203	0.349132	0.215201		0.282772	1	0.0472989		0.568447	1	-0.0822332		0.498207	1	-0.161434		0.0844886	1	-0.0327684			0.00621306	-0.00623579	-0.137198	-0.0367412	0.0594385
878	Q4VC31	CCDC58	Coiled-coil domain-containing protein 58 OS=Homo sapiens GN=CCDC58 PE=1 SV=1	CCDC58 (3)	CCDC58 (2)	CCDC58 (3;2)	Both	Mitochondrion-Mtx	3	2		1.25587	0.286758	0.207156		0.967627	0.587592	-0.102825		0.177382	0.599626	0.0967836		0.574557	0.347912	0.214838		0.162514	1	0.0890318		0.109563	1	0.0616677		0.0512953	0.977707	-0.0263013		0.319772	1	-0.110018			0.0519252	-0.0538295	0.250679	-0.13567	0.262227
247	P48728	AMT	Aminomethyltransferase, mitochondrial OS=Homo sapiens GN=AMT PE=1 SV=1	AMT (6)	AMT (7)	AMT (6;7)	Both		6	7		0.0298586	0.961613	0.00814448		0.278144	0.606283	-0.111967		0.120378	0.928568	-0.0134691		2.28209	0.278395	0.214806		0.203384	1	-0.0612828		0.383048	1	-0.108415		0.538513	0.977302	-0.12933		1.44412	1	-0.146613			-0.021395	0.0210689	-0.0688267	-0.236238	-0.0416685
1650	Q9NP97	DYNLRB1	Dynein light chain roadblock-type 1 OS=Homo sapiens GN=DYNLRB1 PE=1 SV=3	DYNLRB1 (9)	DYNLRB1 (6)	DYNLRB1 (9;6)	Both		9	6		0.907074	0.355228	-0.166155		0.340733	0.606477	0.0979316		0.56479	0.296162	-0.211207		0.881207	0.302697	0.214594		0.0781231	1	-0.0324764		0.242727	1	-0.0971284		0.138491	0.963293	-0.0430834		0.044614	1	-0.0129015			-0.127579	0.117137	-0.163243	0.00905633	-0.101156
5304	Q9H9B4	SFXN1	Sideroflexin-1 OS=Homo sapiens GN=SFXN1 PE=1 SV=4	SFXN1 (14)	SFXN1 (11)	SFXN1 (14;11)	Both	Mitochondrion-IM	14	11		0.319309	0.829131	0.0339441		0.0367816	0.952749	0.0121036		0.403811	0.61127	0.0855236		1.13809	0.326387	0.214039		0.340786	1	0.0714379		0.0096911	1	-0.00221306		0.0139716	0.999218	0.00155748		0.117231	1	-0.0170861			-0.0115928	0.0114933	0.00133792	0.106289	0.147191
2533	G3V4C1	HNRNPC	Heterogeneous nuclear ribonucleoproteins C1/C2 OS=Homo sapiens GN=HNRNPC PE=1 SV=1	HNRNPC (7)	HNRNPC (6)	HNRNPC (7;6)	Both		7	6		0.285546	0.725074	-0.054175		0.981014	0.698277	-0.0626579		0.058576	0.889919	-0.0255294		0.473274	0.360138	0.213602		0.315319	1	0.130114		0.289483	1	0.119422		0.0569432	0.974538	-0.0277748		0.0524891	1	-0.0249762			-0.0646145	0.0618058	-0.113746	-0.0538997	-0.152797
462	Q9NVI7	ATAD3A	ATPase family AAA domain-containing protein 3A OS=Homo sapiens GN=ATAD3A PE=1 SV=2	ATAD3A (10)	ATAD3A (6)	ATAD3A (10;6)	Both	Mitochondrion-IM	10	6		0.1004	0.899729	0.0211935		0.340349	0.828724	0.0377128		0.608448	0.526905	0.101092		0.806084	0.336594	0.213557		0.236182	1	0.0556643		0.330323	1	0.0543996		0.35946	0.965528	-0.0781496		0.0136407	0.999659	-0.00318722			-0.049084	0.0474393	0.0828148	0.00317097	0.149688
3377	Q9HC36	MRM3	rRNA methyltransferase 3, mitochondrial OS=Homo sapiens GN=MRM3 PE=1 SV=2	MRM3 (2)	MRM3 (1)	MRM3 (2;1)	Both	Mitochondrion-Mtx	2	1		0.0552788	0.709571	0.0808425		2.59612	0.214667	0.401073		0.455147	0.337729	0.193462		0.109445	0.502227	0.213493		0.450363	1	0.191181		0.51924	1	0.223469		0.0597211	0.96367	0.123993		0.0397417	1	0.0891844			0.0294584	-0.0300535	-0.346464	0.411238	0.063202
6562	O75083	WDR1	WD repeat-containing protein 1 OS=Homo sapiens GN=WDR1 PE=1 SV=4	WDR1 (29)	WDR1 (20)	WDR1 (29;20)	Both		29	20		0.769767	0.551603	0.0851974		2.00585	0.357752	0.204529		1.29276	0.460238	0.110021		0.25213	0.408703	0.213396		0.125983	1	0.0397242		0.297201	1	-0.0529215		0.145527	0.978308	-0.12428		0.0203083	1	-0.020582			0.0687801	-0.0721774	0.117026	0.201369	0.111919
1026	O14647	CHD2	Chromodomain-helicase-DNA-binding protein 2 OS=Homo sapiens GN=CHD2 PE=1 SV=2	CHD2 (9)	CHD2 (12)	CHD2 (9;12)	Both	Nuclear (100% filter)	9	12		0.0324448	0.975591	0.00490611		0.222617	0.571221	0.144461		0.320968	0.679948	0.0686223		0.401779	0.374727	0.213169		0.22647	1	0.123132		0.399329	1	0.209659		0.121685	0.968251	0.0760895		0.000187678	1	-0.000132481			-0.045441	0.044026	-0.0371339	0.342482	0.133853
1605	Q2PZI1	DPY19L1	Probable C-mannosyltransferase DPY19L1 OS=Homo sapiens GN=DPY19L1 PE=2 SV=1	DPY19L1 (1)	DPY19L1 (3)	DPY19L1 (1;3)	Both		1	3		0.200791	0.950901	0.0083031		0.754462	0.606066	0.100376		0.636026	0.34232	0.186701		0.650587	0.348878	0.213078		0.578159	1	0.209026		0.385009	1	0.129694		0.370488	1	-0.153753		0.11555	1	0.0495315			-0.00530638	0.00528342	0.0162237	0.135067	0.260616
1850	P62508	ESRRG	Estrogen-related receptor gamma OS=Homo sapiens GN=ESRRG PE=1 SV=1	ESRRG (4)	ESRRG (2)	ESRRG (4;2)	Both		4	2		0.901876	0.274237	-0.233573		1.81903	0.284781	-0.280257		0.590447	0.5281	0.101085		1.33453	0.305673	0.212888		1.25142	1	-0.387511		0.571278	1	-0.100997		1.34367	1	-0.26623		0.0836856	1	0.0300016			-0.0204429	0.0201447	-0.173687	-0.249584	0.0501833
760	P00918	CA2	Carbonic anhydrase 2 OS=Homo sapiens GN=CA2 PE=1 SV=2	CA2 (3)	CA2 (2)	CA2 (3;2)	Both		3	2		0.102825	0.897715	0.0198136		0.0886166	0.855327	-0.0355952		0.0763965	0.862404	-0.0297392		1.32995	0.290896	0.212722		0.357636	1	0.130261		0.109841	1	0.0597304		0.452668	0.960864	-0.0453608		0.134878	1	-0.0486977			-0.0701214	0.0668291	0.02364	-0.153442	0.0736344
884	Q9Y3X0	CCDC9	Coiled-coil domain-containing protein 9 OS=Homo sapiens GN=CCDC9 PE=1 SV=1	CCDC9 (3)	CCDC9 (1)	CCDC9 (3;1)	Both		3	1		0.255864	0.638898	-0.0706737		0.558855	0.619708	0.0889337		0.469114	0.350651	0.177266		0.196906	0.432201	0.212504		0.490356	1	-0.211052		0.0607094	1	0.0555544		0.1049	0.972904	0.119156		0.0845753	1	-0.136874			-0.172725	0.154147	-0.155056	0.0802606	0.0551126
1718	B5ME19	EIF3CL	Eukaryotic translation initiation factor 3 subunit C-like protein OS=Homo sapiens GN=EIF3CL PE=3 SV=1	EIF3CL (26)	EIF3CL (19)	EIF3CL (26;19)	Both		26	19		0.574625	0.630574	-0.066685		0.366115	0.799535	0.0423018		0.0977285	0.928776	0.0134563		0.590739	0.348213	0.212463		1.01679	1	-0.10757		0.716929	1	-0.0678024		0.494603	1	-0.169771		0.18524	1	-0.0707784			-0.0620956	0.0594958	-0.0380263	0.0155018	-0.0152341
3219	Q16798	ME3	NADP-dependent malic enzyme, mitochondrial OS=Homo sapiens GN=ME3 PE=2 SV=2	ME3 (5)	ME3 (6)	ME3 (5;6)	Both		5	6		0.292511	0.918318	-0.0155232		1.20626	0.559613	-0.117431		1.44728	0.228449	0.250482		1.46348	0.310206	0.212315		0.131233	1	0.0320018		0.84141	1	-0.10381		0.220826	0.963706	0.0707796		0.519103	1	-0.047842			0.0319046	-0.0326051	-0.0311659	-0.140536	0.278811
3677	P19404	NDUFV2	NADH dehydrogenase [ubiquinone] flavoprotein 2, mitochondrial OS=Homo sapiens GN=NDUFV2 PE=1 SV=2	NDUFV2 (8)	NDUFV2 (8)	NDUFV2 (8;8)	Both	Mitochondrion-IM	8	8		0.589875	0.518727	-0.0953634		0.0895703	0.92501	0.0176283		0.536023	0.552931	-0.0879801		0.81398	0.314649	0.212094		0.355621	1	0.0662297		0.0676052	1	-0.0138641		0.0267714	0.995798	0.00754921		0.193959	1	-0.0507851			-0.12189	0.112321	-0.0987722	0.00621015	-0.07695
3569	P43490	NAMPT	Nicotinamide phosphoribosyltransferase OS=Homo sapiens GN=NAMPT PE=1 SV=1	NAMPT (14)	NAMPT (17)	NAMPT (14;17)	Both		14	17		1.50524	0.443611	0.118996		0.0466789	0.928223	-0.0201395		2.4641	0.226209	0.230043		1.69446	0.288465	0.211831		0.04525	1	-0.00708602		0.706709	1	0.0404435		0.0305605	0.998198	-0.00355352		0.0938833	1	-0.0258908			0.0551965	-0.0573554	0.103076	0.102411	0.245135
480	Q8WXF7	ATL1	Atlastin-1 OS=Homo sapiens GN=ATL1 PE=1 SV=1	ATL1 (11)	ATL1 (9)	ATL1 (11;9)	Both		11	9		0.4839	0.761091	-0.042028		1.31946	0.434486	0.165642		0.374222	0.403128	-0.161955		0.544561	0.351097	0.211729		0.178591	1	-0.0763699		0.127365	1	-0.0555856		0.510577	1	-0.204181		0.150667	1	-0.0718648			-0.0666947	0.0637076	-0.0578702	0.128438	-0.293616
344	Q9UKG1	APPL1	DCC-interacting protein 13-alpha OS=Homo sapiens GN=APPL1 PE=1 SV=1	APPL1 (10)	APPL1 (7)	APPL1 (10;7)	Both		10	7		0.640785	0.464705	0.121644		0.0490887	0.9524	0.0111965		1.16213	0.275901	0.207485		0.695452	0.341007	0.211552		0.0754606	1	-0.0132377		0.756722	1	-0.175941		0.297782	0.968178	-0.0827438		0.103495	1	0.0457002			0.0873864	-0.092962	0.178458	-0.0525704	0.255569
3256	Q14696	MESDC2	LDLR chaperone MESD OS=Homo sapiens GN=MESDC2 PE=1 SV=2	MESDC2 (6)	MESDC2 (6)	MESDC2 (6;6)	Both	ER-Lumen	6	6		1.3616	0.213428	0.3075		0.702518	0.322832	0.269161		2.01789	0.0634326	0.567468		0.208844	0.422281	0.21125		0.320626	1	-0.171319		0.449587	1	-0.237635		0.274417	1	-0.280173		0.0420235	1	0.048697			0.212483	-0.249103	0.328573	0.141293	0.488866
1988	Q8WUP2	FBLIM1	Filamin-binding LIM protein 1 OS=Homo sapiens GN=FBLIM1 PE=1 SV=2	FBLIM1 (1)	FBLIM1 (1)	FBLIM1 (1;1)	Both		1	1		0.00431351	0.987072	-0.0025496		1.06736	0.208242	0.471361		0.532585	0.212178	-0.289377		0.454286	0.33971	0.211215		0.644776	1	-0.317492		0.14806	1	-0.0710764		0.126329	0.97593	-0.148379		0.538227	1	-0.282286			-0.326484	0.26591	-0.0627503	0.39812	-0.469097
3457	Q9UJ68	MSRA	Mitochondrial peptide methionine sulfoxide reductase OS=Homo sapiens GN=MSRA PE=1 SV=1	MSRA (5)	MSRA (2)	MSRA (5;2)	Both		5	2		0.308425	0.327632	-0.238713		0.674872	0.319551	-0.297482		0.5486	0.351984	0.184566		0.72822	0.349031	0.210889		0.365298	1	-0.118887		0.418253	1	-0.121342		0.612078	1	-0.458487		0.723955	1	-0.413754			-0.00374039	0.00372841	-0.00621506	-0.194287	0.27288
4376	A0A0D9SF23	POU2F2	POU domain, class 2, transcription factor 2 OS=Homo sapiens GN=POU2F2 PE=1 SV=1	POU2F2 (1)	POU2F2 (1)	POU2F2 (1;1)	Both		1	1		0.681631	0.515654	-0.0948956		0.40971	0.682607	0.0700318		0.326525	0.483734	0.123347		0.803406	0.325813	0.210844		0.00699776	1	-0.00298499		0.299243	1	-0.114676		0.30224	0.967732	-0.0761005		0.113026	1	0.0292128			0.031102	-0.031767	-0.13519	0.018426	0.238028
2072	Q9H479	FN3K	Fructosamine-3-kinase OS=Homo sapiens GN=FN3K PE=1 SV=1	FN3K (7)	FN3K (4)	FN3K (7;4)	Both		7	4		0.0127937	0.976509	0.00414562		0.615457	0.491988	0.145411		1.34844	0.191153	-0.278098		0.915679	0.305018	0.210719		0.205429	1	0.0460276		0.287247	1	-0.121225		0.526723	0.973903	0.107711		0.258645	1	-0.0514389			-0.195119	0.171744	-0.0654722	0.0778774	-0.318168
3287	Q9BQP7	MGME1	Mitochondrial genome maintenance exonuclease 1 OS=Homo sapiens GN=MGME1 PE=1 SV=1	MGME1 (1)	MGME1 (3)	MGME1 (1;3)	Both	Mitochondrion-Mtx	1	3		0.618847	0.321195	0.190098		0.195255	0.516691	-0.178032		0.622589	0.201733	0.302051		0.595234	0.322821	0.210385		0.199193	1	0.0977824		0.0589917	1	0.0344601		0.281916	1	-0.163027		0.0269893	1	0.0137187			0.269812	-0.331918	0.235691	-0.471655	0.436764
5862	Q8TBP0	TBC1D16	TBC1 domain family member 16 OS=Homo sapiens GN=TBC1D16 PE=2 SV=1	TBC1D16 (1)	TBC1D16 (1)	TBC1D16 (1;1)	Both		1	1		0.714711	0.187815	0.469336		0.00777313	0.991953	-0.0024926		0.455435	0.37303	0.157077		0.311693	0.378145	0.210101		0.141084	1	-0.0832553		0.262928	1	-0.10314		0.0242806	0.991806	-0.0182628		0.326306	1	0.227679			0.148376	-0.165293	0.64977	-0.0369509	0.0462716
2961	Q08380	LGALS3BP	Galectin-3-binding protein OS=Homo sapiens GN=LGALS3BP PE=1 SV=1	LGALS3BP (6)	LGALS3BP (7)	LGALS3BP (6;7)	Both	ER-Lumen	6	7		0.455419	0.65821	-0.070277		3.00293	0.656574	-0.072286		0.860025	0.59099	0.0856038		0.813892	0.347865	0.210065		0.0999463	1	-0.0404723		0.357195	1	0.0769735		0.128263	0.967095	-0.0351731		0.353626	1	0.0638054			-0.00405313	0.00403937	-0.114296	-0.0681302	0.108296
1411	O95865	DDAH2	N(G),N(G)-dimethylarginine dimethylaminohydrolase 2 OS=Homo sapiens GN=DDAH2 PE=1 SV=1	DDAH2 (20)	DDAH2 (15)	DDAH2 (20;15)	Both		20	15		0.0279568	0.960056	-0.00875058		0.300747	0.683075	0.0814331		0.118552	0.888058	0.024936		0.633468	0.356201	0.209722		0.612848	1	0.190231		0.402907	1	0.088327		0.24738	0.960739	-0.0653105		0.158123	1	-0.0597551			0.0129356	-0.0130443	-0.0977998	0.163091	0.0881818
2941	Q14739	LBR	Lamin-B receptor OS=Homo sapiens GN=LBR PE=1 SV=2	LBR (3)	LBR (5)	LBR (3;5)	Both	ER-Membrane	3	5		0.147757	0.580435	0.100496		0.249335	0.619202	0.0982239		0.195179	0.468952	0.141179		0.459849	0.35073	0.209537		0.0133186	1	-0.0123232		0.00135919	1	0.0014498		0.0247043	0.993861	-0.0132562		0.278556	1	-0.135576			-0.222902	0.192913	-0.111596	0.206819	-0.0879444
5637	P61011	SRP54	Signal recognition particle 54 kDa protein OS=Homo sapiens GN=SRP54 PE=1 SV=1	SRP54 (14)	SRP54 (18)	SRP54 (14;18)	Both	ER-Membrane	14	18		0.141863	0.946128	0.0113914		0.373081	0.952635	0.0105213		4.12497	0.4006	0.126744		0.684847	0.353404	0.209337		0.0960363	1	-0.0207492		0.218478	1	0.0119084		0.520632	0.986746	-0.130885		0.109824	1	0.0546378			-0.00649145	0.00645826	0.0357011	0.019249	0.123126
3610	Q6PIU2	NCEH1	Neutral cholesterol ester hydrolase 1 OS=Homo sapiens GN=NCEH1 PE=1 SV=3	NCEH1 (4)	NCEH1 (4)	NCEH1 (4;4)	Both	ER-Membrane	4	4		0.198637	0.861846	-0.0247455		0.180334	0.828585	-0.0390111		0.224742	0.835558	-0.0314493		1.85061	0.290255	0.209304		0.251657	1	0.0528042		0.233957	1	-0.0358762		1.4439	1	-0.220674		1.55344	1	-0.113817			-0.097304	0.091098	-0.002491	-0.104374	-0.0679839
3725	Q8NEJ9	NGDN	Neuroguidin OS=Homo sapiens GN=NGDN PE=1 SV=1	NGDN (2)	NGDN (1)	NGDN (2;1)	Both		2	1		1.70054	0.260366	0.224752		0.0405458	0.955705	-0.00982915		2.5149	0.103963	0.404003		0.242678	0.416361	0.209221		0.301287	1	-0.0995118		0.22813	1	0.0833007		0.0343237	0.974269	-0.0322532		0.15699	1	-0.136447			0.0398695	-0.0409765	0.188187	-0.0749029	0.437516
2993	P20700	LMNB1	Lamin-B1 OS=Homo sapiens GN=LMNB1 PE=1 SV=2	LMNB1 (75)	LMNB1 (65)	LMNB1 (75;65)	Both		75	65		1.89681	0.676961	-0.0557338		0.952595	0.498469	-0.153105		0.387737	0.401165	0.164978		1.59138	0.314025	0.209		0.329118	1	-0.136103		0.129965	1	-0.0535142		0.0467657	0.992121	0.0158584		0.578998	1	0.0454924			-0.0249435	0.0245041	-0.0558302	-0.186684	0.0407044
4079	Q8WUM4	PDCD6IP	Programmed cell death 6-interacting protein OS=Homo sapiens GN=PDCD6IP PE=1 SV=1	PDCD6IP (27)	PDCD6IP (34)	PDCD6IP (27;34)	Both		27	34		0.777664	0.687277	0.0563495		0.32339	0.756985	-0.0581292		2.34017	0.343851	0.153126		1.24011	0.321776	0.208969		0.79779	1	-0.069908		0.45268	1	-0.0604834		0.742349	0.978152	-0.106051		0.0333943	1	-0.00818704			0.0313019	-0.0319757	0.0780469	-0.113361	0.167423
5233	Q13228	SELENBP1	Selenium-binding protein 1 OS=Homo sapiens GN=SELENBP1 PE=1 SV=2	SELENBP1 (6)	SELENBP1 (5)	SELENBP1 (6;5)	Both		6	5		0.107864	0.836352	0.0354189		1.20872	0.568529	-0.113885		0.858362	0.459127	0.121925		0.33556	0.394455	0.208364		0.655973	1	0.15312		0.426764	1	0.0788564		0.00595578	0.998413	0.00412945		0.0673907	1	-0.0447826			0.03149	-0.0321721	0.13355	-0.0913914	0.156421
2186	P50395	GDI2	Rab GDP dissociation inhibitor beta OS=Homo sapiens GN=GDI2 PE=1 SV=2	GDI2 (39)	GDI2 (33)	GDI2 (39;33)	Both		39	33		0.213829	0.828358	0.0349909		3.04566	0.491712	0.13435		0.268202	0.820868	0.0384379		0.438428	0.376205	0.208149		0.0920571	1	0.0149573		0.638935	1	-0.0963918		0.385193	1	-0.178522		0.0367483	1	0.0231105			-0.00471616	0.00469779	-0.0154472	0.140801	-0.00589547
5840	Q92844	TANK	TRAF family member-associated NF-kappa-B activator OS=Homo sapiens GN=TANK PE=1 SV=2	TANK (4)	TANK (4)	TANK (4;4)	Both		4	4		0.0235347	0.914599	-0.0229652		0.235969	0.662034	-0.091878		0.0572337	0.884932	0.0275211		0.587726	0.36061	0.208005		0.129958	1	0.06056		0.0895458	1	-0.0598997		0.522097	1	0.165604		0.106119	1	-0.101117			-0.0043592	0.00434307	0.253242	0.026999	0.167243
3422	O60783	MRPS14	28S ribosomal protein S14, mitochondrial OS=Homo sapiens GN=MRPS14 PE=1 SV=1	MRPS14 (1)	MRPS14 (1)	MRPS14 (1;1)	Both	Mitochondrion-Mtx	1	1		0.586944	0.618209	0.0703672		0.138686	0.507948	0.218921		0.0963869	0.820411	0.0409867		0.145637	0.47671	0.207964		0.224804	1	-0.170173		0.298536	1	-0.173685		0.0100192	0.994893	-0.0187345		0.0660293	1	-0.100604			0.0727393	-0.0765526	0.0619946	-0.261887	0.162853
5421	Q8N1S5	SLC39A11	Zinc transporter ZIP11 OS=Homo sapiens GN=SLC39A11 PE=2 SV=3	SLC39A11 (1)	SLC39A11 (2)	SLC39A11 (1;2)	Both		1	2		0.0360193	0.863195	0.0340871		0.00460539	0.994649	0.00167003		1.29904	0.200888	0.268884		0.622049	0.339466	0.207748		0.0767544	1	0.0503259		0.0480629	1	0.0302267		0.664782	1	0.243292		0.0775382	1	-0.0355191			0.0688201	-0.0722214	-0.240521	0.0823523	0.319687
[truncated: 5,793 more rows]
[truncated: 15 more columns]

## Sheet: SiteQuant
												Kenp_DMSO vs DMSO_DMSO				MAP4K4_DMSO vs DMSO_DMSO				DMSO_Thap_d1 vsDMSO_DMSO				DMSO_Thap_d2 vs DMSO_DMSO				Kenp_Thap_d1 vs DMSO_Thap_d1				MAP4K4_Thap_d1 vs DMSO_Thap_d1				Kenp_Thap_d2 vs DMSO_Thap_d2				MAP4K4_Thap_d2 vs DMSO_Thap_d2							Log2 ratio
[truncated: 8,004 more rows]
[truncated: 17 more columns]
